# Supplementary material for: Transcriptomic Analysis Revealed Key Defense Genes and Signaling Pathways Mediated by the Arabidopsis thaliana Gene SAD2 in Response to Infection with Pseudomonas syringae pv. Tomato DC3000
Source: MDPI journal article supplement (doi:10.3390/ijms24044229), 2023-02-20
Supplement: s1 [file s1]

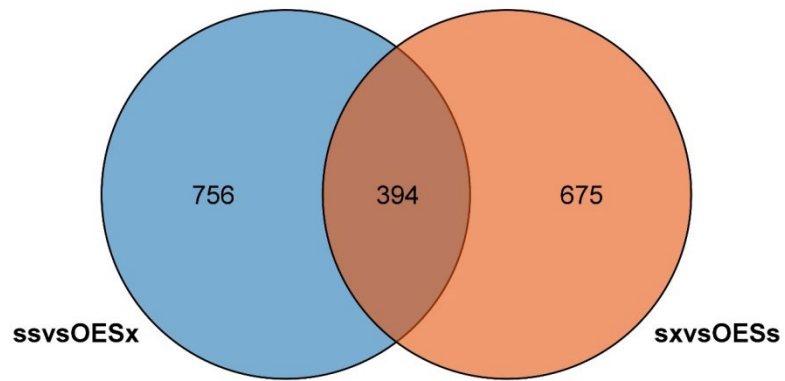

Figure S1 1825 differentially expressed genes (DEGs) presumed to be pathogen defense-related. ssvsOESx represents all the DEGs in Figure 3C, and sxvsOESs represents all the DEGs in Figure 3F.
