# Supplementary material for: Transcriptomic Analysis Revealed Key Defense Genes and Signaling Pathways Mediated by the Arabidopsis thaliana Gene SAD2 in Response to Infection with Pseudomonas syringae pv. Tomato DC3000
Source: Int J Mol Sci. 2023 Feb 20;24(4):4229. doi: 10.3390/ijms24044229 (PMC9963955; doi:10.3390/ijms24044229)
Supplement: Supplementary file 1 [file ijms-24-04229-s001.zip › Table S1.xlsx]

## Sheet: Summary information of DEGS
Table S1. Differentially expressed genes (DEGs) in SAD2 knockout and overexpression lines (sad2-5 and OESAD2, respectively) compared to wild-type Col-0 plants after infection with Pseudomonas syringae pv. tomato DC3000
Col-0_vs_sad2-5
DEGs Table	times	up	down
C0vss0	0d	357	637
C1vss1	1d	62	97
C2vss2	2d	186	575
C3vss3	3d	35	47
Col-0_vs_OESAD2/Col-0
DEGs Table	times	up	down
C0vsOS0	0d	1195	1872
C1vsOS1	1d	352	636
C2vsOS2	2d	91	380
C3vsOS3	3d	42	108

## Sheet: C0vss0
DEGs between sad2-5 and Col-0 before inoculation of Pst DC3000
GeneID	Short_description	NormalizedTPM_Col_0d_rep1	NormalizedTPM_Col_0d_rep2	NormalizedTPM_Col_0d_rep3	NormalizedTPM_sad2_0d_rep1	NormalizedTPM_sad2_0d_rep2	NormalizedTPM_sad2_0d_rep3	Log2Foldchange_Col_0d_VS_sad2_0d	Pvalue_Col_0d_VS_sad2_0d	adjPvalue_Col_0d_VS_sad2_0d	MeanTPMCol_0d	MeanTPMsad2_0d	Significant
AT1G01030	AP2/B3-like transcriptional factor family protein	14.9394	20.9856	16.4726	4.2975	3.51357	3.05711	-2.25007	1.89342e-24	1.54823e-21	17.4659	3.62273	down
AT1G01070	nodulin MtN21 /EamA-like transporter family protein	0.586848	0.549284	0.535411	2.3541	1.61888	1.39839	1.69987	5.5438e-05	0.00133176	0.557181	1.79046	up
AT1G01130		7.78988	8.17504	8.08164	13.0549	14.198	19.4544	1.01855	0.00149955	0.0190673	8.01552	15.5691	up
AT1G02810	Plant invertase/pectin methylesterase inhibitor superfamily	0.417992	0.478178	0.322033	1.20871	0.99765	0.804946	1.32907	0.00339374	0.0350078	0.406068	1.00377	up
AT1G02900	rapid alkalinization factor 1	10.167	7.36967	11.9923	1.84736	1.70776	5.29957	-1.63422	0.000555275	0.00891627	9.84299	2.95156	down
AT1G03300	DOMAIN OF UNKNOWN FUNCTION 724 1	0.461736	0.22638	0.228687	0.735727	0.793481	0.902148	1.4766	0.00470759	0.0444223	0.305601	0.810452	up
AT1G03820		10.2932	5.68425	6.7803	3.68341	2.43218	3.2403	-1.23527	0.000134806	0.00280427	7.58591	3.11863	down
AT1G03905	P-loop containing nucleoside triphosphate hydrolases superfamily protein	6.05142	5.33729	7.96831	2.23544	2.06651	2.03067	-1.58037	8.1645e-08	4.42799e-06	6.45234	2.11087	down
AT1G04100	indoleacetic acid-induced protein 10	6.49439	7.03674	7.73975	2.42768	3.30568	3.82021	-1.096	0.000219886	0.00417018	7.09029	3.18452	down
AT1G04160	myosin XI B	8.13854	8.60199	7.81216	5.41765	3.83429	1.43933	-1.21684	0.000176682	0.00352369	8.18423	3.56376	down
AT1G04540	Calcium-dependent lipid-binding (CaLB domain) family protein	1.86258	1.60572	1.84801	0.455586	0.568561	0.502775	-1.75506	4.62665e-06	0.000156379	1.7721	0.508974	down
AT1G04570	Major facilitator superfamily protein	4.02578	3.85373	3.66771	0.191346	0.668235	1.0356	-2.49813	8.85681e-08	4.76698e-06	3.84907	0.631727	down
AT1G05090	dentin sialophosphoprotein-related	3.19278	4.37519	4.01528	1.59049	1.57788	0.885735	-1.50959	4.3241e-07	1.96013e-05	3.86108	1.35137	down
AT1G05420	ovate family protein 12	8.51417	11.9842	6.92886	2.83928	1.28443	2.02301	-2.13217	1.03287e-08	6.99322e-07	9.14241	2.04891	down
AT1G05575		65.9903	32.2585	53.2594	168.945	216.245	156.554	1.88041	1.05321e-13	1.80575e-11	50.5027	180.581	up
AT1G06160	octadecanoid-responsive Arabidopsis AP2/ERF 59	0.142623	0.0444979	0.0412054	0.751203	1.14377	0.605363	3.51672	0.000320316	0.00570172	0.0761088	0.833446	up
AT1G06520	glycerol-3-phosphate acyltransferase 1	1.90798	1.76508	2.40365	5.03158	5.73792	4.47296	1.35526	1.29846e-07	6.73301e-06	2.02557	5.08082	up
AT1G07090	Protein of unknown function (DUF640)	31.4002	43.7999	43.2846	8.81247	5.8074	14.7423	-1.94443	8.21677e-09	5.69018e-07	39.4949	9.78738	down
AT1G07135	glycine-rich protein	159.447	113.416	186.308	418.419	491.798	365.763	1.50596	3.15921e-12	4.60033e-10	153.057	425.326	up
AT1G07747	Bifunctional inhibitor/lipid-transfer protein/seed storage 2S albumin superfamily protein	0.461049	0.719229	2.26444	0	0	0	-5.60993	0.00159792	0.0199248	1.14824	0	down
AT1G08250	arogenate dehydratase 6	34.7959	33.6294	40.0348	11.5019	7.31658	8.60233	-1.95918	4.46367e-21	2.15677e-18	36.1534	9.14029	down
AT1G09350	galactinol synthase 3	1.87113	3.98036	2.86021	0.316214	0.380012	1.2996	-2.01492	0.000412683	0.00700211	2.9039	0.665275	down
AT1G10370	Glutathione S-transferase family protein	108.581	161.921	189.02	37.9321	15.8131	51.002	-2.07863	1.11984e-08	7.41679e-07	153.174	34.9157	down
AT1G10410	Protein of unknown function (DUF1336)	58.748	68.9629	81.3202	27.7562	25.0867	23.589	-1.42514	7.75736e-14	1.36299e-11	69.677	25.4773	down
AT1G10550	xyloglucan:xyloglucosyl transferase 33	1.28472	1.12491	1.00575	5.66244	4.30869	3.66465	2.02097	1.72919e-09	1.41395e-07	1.13846	4.54526	up
AT1G10657	Plant protein 1589 of unknown function	11.251	14.4277	7.21708	5.66646	4.55684	5.04899	-1.06789	0.000351777	0.00612513	10.9653	5.09076	down
AT1G10690		5.8692	8.14333	6.46352	1.09106	1.7799	1.90502	-2.03743	2.0723e-07	1.01514e-05	6.82535	1.59199	down
AT1G10770	Plant invertase/pectin methylesterase inhibitor superfamily protein	2.38633	4.25444	4.62907	1.37307	1.26931	1.68813	-1.33859	0.00212964	0.0250923	3.75661	1.4435	down
AT1G11055		10.7526	5.85135	11.2703	17.8968	15.6849	27.5959	1.20242	0.00444824	0.0424797	9.2914	20.3925	up
AT1G11080	serine carboxypeptidase-like 31	0.250575	0.490393	0.394876	0	0	0.0644586	-3.91886	0.000633351	0.00991395	0.378615	0.0214862	down
AT1G11390	Protein kinase superfamily protein	19.1761	22.204	20.837	11.2139	10.2752	8.76	-1.01514	3.6171e-09	2.77616e-07	20.739	10.083	down
AT1G11785		6.07319	7.75152	9.17184	2.48034	2.29289	1.49719	-1.8694	1.48908e-06	5.9149e-05	7.66552	2.09014	down
AT1G11925	Stigma-specific Stig1 family protein	2.37012	3.04387	2.86642	8.76069	5.02021	4.05519	1.10382	0.00163709	0.0203298	2.76014	5.94536	up
AT1G12330		5.66965	6.308	3.98689	4.10151	1.56258	2.15675	-1.01842	0.00292714	0.0313349	5.32151	2.60695	down
AT1G12610	Integrase-type DNA-binding superfamily protein	118.894	92.2284	97.5129	222.321	272.587	288.298	1.39978	9.11136e-12	1.25784e-09	102.878	261.069	up
AT1G12740	cytochrome P450, family 87, subfamily A, polypeptide 2	0.023234	0.0217468	0	0.323932	0.479124	0.246541	4.61552	0.00038661	0.00662848	0.0149936	0.349866	up
AT1G13100	cytochrome P450, family 71, subfamily B, polypeptide 29	4.96922	5.54351	4.83284	1.71862	1.71286	2.39123	-1.33833	6.37383e-06	0.000206882	5.11519	1.9409	down
AT1G13110	cytochrome P450, family 71 subfamily B, polypeptide 7	99.5421	93.218	100.362	34.5307	49.769	45.4841	-1.12458	9.63778e-08	5.16119e-06	97.7075	43.2613	down
AT1G13245	ROTUNDIFOLIA like 17	29.2778	31.9829	27.43	11.8658	9.39266	16.9262	-1.15224	4.97684e-05	0.00122463	29.5636	12.7282	down
AT1G13609	Defensin-like (DEFL) family protein	1.04828	0.21804	0.403813	18.1879	2.20176	3.04868	3.7905	2.19257e-06	8.35376e-05	0.556711	7.81279	up
AT1G14120	2-oxoglutarate (2OG) and Fe(II)-dependent oxygenase superfamily protein	0.855459	0.139252	2.22436	0.0691418	0.159792	0	-3.86137	0.000313887	0.00561247	1.07302	0.0763112	down
AT1G14250	GDA1/CD39 nucleoside phosphatase family protein	453.372	479.738	385.305	121.724	103.729	68.0322	-2.15393	6.04835e-29	6.12323e-26	439.472	97.8284	down
AT1G14280	phytochrome kinase substrate 2	33.072	40.4483	27.1533	11.9934	9.71362	14.1649	-1.43659	3.34004e-09	2.60691e-07	33.5579	11.9573	down
AT1G14290	sphingoid base hydroxylase 2	21.0748	29.8783	22.9669	14.1078	13.073	9.19238	-1.00815	5.74924e-06	0.000190684	24.64	12.1244	down
AT1G14780	MAC/Perforin domain-containing protein	10.2932	11.7123	12.6824	6.15309	4.49151	4.68305	-1.1552	3.10125e-08	1.81632e-06	11.5626	5.10921	down
AT1G14800	Nucleic acid-binding, OB-fold-like protein	0.766419	1.04017	1.02964	2.35082	2.00853	2.1416	1.22585	0.002188	0.025601	0.945409	2.16699	up
AT1G15570	CYCLIN A2;3	1.85397	2.21855	1.62724	1.35241	0.766255	0.547855	-1.10096	0.00420647	0.0406868	1.89992	0.888839	down
AT1G15580	indole-3-acetic acid inducible 5	8.38698	9.03754	9.22404	4.52009	3.57292	4.43735	-1.04901	0.000323875	0.00572844	8.88285	4.17679	down
AT1G15890	Disease resistance protein (CC-NBS-LRR class) family	4.94831	4.27529	4.96188	11.5762	15.2017	6.89332	1.26271	9.17507e-07	3.86935e-05	4.72849	11.2237	up
AT1G16060	ARIA-interacting double AP2 domain protein	3.00497	3.60367	3.52694	6.80807	5.64808	8.34806	1.08709	0.000119076	0.00253663	3.37853	6.93474	up
AT1G16400	cytochrome P450, family 79, subfamily F, polypeptide 2	3.62947	3.39715	3.28877	15.7066	10.429	9.50326	1.80569	4.37508e-16	1.19249e-13	3.43846	11.8796	up
AT1G16500		26.116	29.1024	25.1168	5.40338	3.10298	10.1254	-2.02503	4.24697e-08	2.40775e-06	26.7784	6.21058	down
AT1G17232		24.2011	19.7194	20.3516	14.9628	11.7588	5.01889	-1.02305	0.00052633	0.00856798	21.4241	10.5802	down
AT1G17940	Endosomal targeting BRO1-like domain-containing protein	19.3226	16.485	22.3005	11.7914	7.54468	9.11876	-1.00304	6.04968e-06	0.000198482	19.3694	9.48494	down
AT1G18300	nudix hydrolase homolog 4	193.376	118.059	165.552	383.774	519.214	445.553	1.54981	4.53608e-12	6.51602e-10	158.995	449.514	up
AT1G18460	alpha/beta-Hydrolases superfamily protein	15.959	15.3754	12.3975	8.94698	6.77127	4.93844	-1.06764	4.4093e-07	1.99027e-05	14.5773	6.88557	down
AT1G18570	myb domain protein 51	13.7545	6.78771	9.97325	34.4735	41.6173	22.6407	1.72278	1.44312e-10	1.5264e-08	10.1718	32.9105	up
AT1G18740	Protein of unknown function (DUF793)	288.363	247.233	281.093	517.192	639.107	639.464	1.18712	7.55871e-10	6.75202e-08	272.23	598.588	up
AT1G18810	phytochrome kinase substrate-related	0.647717	1.64556	0.1604	0.143343	0.13251	0.130916	-2.55485	0.00276297	0.0302476	0.817891	0.13559	down
AT1G18870	isochorismate synthase 2	4.97096	3.82512	3.91493	1.22174	1.27316	1.06511	-1.79822	4.16714e-11	5.03372e-09	4.237	1.18667	down
AT1G19050	response regulator 7	84.024	114.837	130.774	40.6296	37.512	51.525	-1.30018	2.2275e-07	1.08018e-05	109.878	43.2222	down
AT1G19210	Integrase-type DNA-binding superfamily protein	9.30161	5.37565	5.89772	27.6777	20.5439	10.6872	1.52456	2.02918e-06	7.84369e-05	6.85833	19.6363	up
AT1G19570	dehydroascorbate reductase	3455.76	3423.08	3748.08	1813.23	1364.37	1781.71	-1.05984	1.53346e-08	9.8197e-07	3542.31	1653.1	down
AT1G19610	Arabidopsis defensin-like protein	5.59503	3.36657	1.81852	0.742924	0.600932	0.565431	-2.44996	0.000102592	0.00224393	3.59338	0.636429	down
AT1G19770	purine permease 14	203.168	164.048	194.806	416.08	536.921	286.843	1.16441	4.91397e-08	2.77848e-06	187.341	413.281	up
AT1G20680	Protein of unknown function (DUF833)	0.262935	0.492209	0.493771	1.30343	1.84504	1.55004	1.94297	0.000483002	0.00798494	0.416305	1.56617	up
AT1G20823	RING/U-box superfamily protein	108.006	64.5222	86.9984	185.647	176.863	176.924	1.09996	6.65342e-08	3.66455e-06	86.509	179.811	up
AT1G21050	Protein of unknown function, DUF617	3.1335	5.91168	3.09783	1.27423	1.43035	1.48934	-1.48958	0.000303069	0.00543733	4.04767	1.39797	down
AT1G21090	Cupredoxin superfamily protein	7.21385	7.85641	4.61632	15.3529	16.8284	14.4034	1.28418	1.01422e-07	5.40408e-06	6.56219	15.5282	up
AT1G21140	Vacuolar iron transporter (VIT) family protein	2.954	2.35017	2.00559	0.960987	0.676849	1.07968	-1.36764	0.0023627	0.0271079	2.43659	0.905839	down
AT1G21270	wall-associated kinase 2	73.5527	67.9889	57.1005	29.8756	33.009	28.2799	-1.08337	1.27778e-10	1.36511e-08	66.214	30.3882	down
AT1G21326	VQ motif-containing protein	6.70058	5.4086	8.04541	20.1697	37.3966	15.2205	1.87365	1.11803e-08	7.41679e-07	6.7182	24.2623	up
AT1G21540	AMP-dependent synthetase and ligase family protein	3.84667	4.36553	4.00084	1.63127	0.351177	1.25855	-1.88348	1.06208e-05	0.000324422	4.07101	1.08033	down
AT1G21790	TRAM, LAG1 and CLN8 (TLC) lipid-sensing domain containing protein	25.2559	37.9304	33.8472	10.5186	7.13071	11.5636	-1.68971	2.2012e-10	2.3053e-08	32.3445	9.73764	down
AT1G21830		25.54	32.7274	28.1975	10.4968	7.98676	13.3969	-1.38579	1.45814e-07	7.45196e-06	28.8216	10.6268	down
AT1G21910	Integrase-type DNA-binding superfamily protein	14.8296	14.0227	13.6113	72.0646	93.6058	33.9738	2.24131	1.84146e-15	4.71681e-13	14.1546	66.5481	up
AT1G21980	phosphatidylinositol-4-phosphate 5-kinase 1	26.1176	28.4398	30.8865	15.5837	11.8187	6.89372	-1.31859	2.78817e-08	1.66976e-06	28.4813	11.432	down
AT1G22250		2.86775	2.12709	1.36003	0.905268	0.139476	0.344495	-2.19401	0.00068021	0.0104413	2.11829	0.463079	down
AT1G22410	Class-II DAHP synthetase family protein	298.385	262.727	309.976	126.291	121.285	80.6345	-1.39008	5.95514e-15	1.42254e-12	290.363	109.404	down
AT1G22470		3.21446	2.31439	1.85739	7.8908	9.06498	3.61502	1.49346	0.00038341	0.00658956	2.46208	6.85693	up
AT1G22490	basic helix-loop-helix (bHLH) DNA-binding superfamily protein	3.89786	3.54606	6.7568	1.62526	1.37723	2.06161	-1.44011	0.000135016	0.00280591	4.73357	1.68804	down
AT1G22550	Major facilitator superfamily protein	6.59506	5.23694	6.12887	3.58504	2.04575	1.09478	-1.43093	1.91559e-05	0.000543007	5.98696	2.24185	down
AT1G22640	myb domain protein 3	6.12335	5.57753	7.58696	3.17045	2.01275	2.87815	-1.22332	5.65827e-05	0.0013486	6.42928	2.68711	down
AT1G23500	GDSL-like Lipase/Acylhydrolase superfamily protein	0	0	0	0.634133	0.219829	0.060329	5.32693	0.00387248	0.0384597	0	0.304764	up
AT1G24070	cellulose synthase-like A10	64.2947	47.916	57.0478	16.0749	10.8688	13.532	-2.02747	3.26602e-24	2.41317e-21	56.4195	13.4919	down
AT1G24140	Matrixin family protein	30.7814	18.1381	28.1647	59.1513	82.2907	41.3358	1.27159	1.17165e-06	4.78103e-05	25.6947	60.9259	up
AT1G25320	Leucine-rich repeat protein kinase family protein	3.84713	4.66716	4.14377	1.5449	1.71699	1.46645	-1.38656	2.46235e-08	1.50864e-06	4.21935	1.57611	down
AT1G25440	B-box type zinc finger protein with CCT domain	108.71	156.462	98.5628	44.6237	19.924	42.4296	-1.7254	7.71224e-09	5.41242e-07	121.245	35.6591	down
AT1G25530	Transmembrane amino acid transporter family protein	2.0743	1.84067	1.26084	4.65729	3.0091	2.64893	1.01572	0.00138429	0.0178689	1.72527	3.43844	up
AT1G26250	Proline-rich extensin-like family protein	6.20248	0.458326	1.43829	0.101142	0	0	-6.39507	0.000427023	0.00722811	2.6997	0.0337139	down
AT1G27020		7.66584	10.0322	9.53042	22.8588	31.4735	11.4103	1.2755	2.91152e-05	0.000787519	9.07616	21.9142	up
AT1G27730	salt tolerance zinc finger	214.567	154.166	226.349	434.719	513.064	391.401	1.20473	1.37173e-09	1.14815e-07	198.361	446.395	up
AT1G27910	plant U-box 45	55.053	59.4289	67.0506	32.2228	30.3821	25.5467	-1.01733	1.44542e-09	1.20038e-07	60.5108	29.3838	down
AT1G28310	Dof-type zinc finger DNA-binding family protein	8.77093	13.0744	7.71937	1.86197	1.62821	1.35967	-2.58527	2.35635e-20	1.06587e-17	9.85489	1.61662	down
AT1G28370	ERF domain protein 11	147.991	99.7757	131.979	271.554	373.849	272.358	1.31483	4.80252e-10	4.53784e-08	126.582	305.92	up
AT1G28660	GDSL-like Lipase/Acylhydrolase superfamily protein	2.65034	1.67447	2.29714	6.18938	6.0917	4.54662	1.37442	8.96001e-07	3.78707e-05	2.20732	5.60923	up
AT1G29400	MEI2-like protein 5	54.0656	56.3765	52.547	22.5594	15.1419	15.6399	-1.58918	3.47317e-19	1.41999e-16	54.3297	17.7804	down
AT1G29920	chlorophyll A/B-binding protein 2	561.426	936.171	371.748	300.08	229.444	354.163	-1.02973	0.000803468	0.0117968	623.115	294.562	down
AT1G30135	jasmonate-zim-domain protein 8	153.186	103.055	145.627	312.557	383.001	257.37	1.27781	8.65828e-10	7.5751e-08	133.956	317.643	up
AT1G30320	Remorin family protein	116.854	121.344	142.675	35.6352	20.5066	53.3222	-1.73362	3.05591e-08	1.79969e-06	126.958	36.488	down
AT1G30760	FAD-binding Berberine family protein	0.728281	0.593707	0.692312	0.283871	0.080744	0.0830964	-2.19422	0.000886859	0.0126882	0.671433	0.149237	down
AT1G30840	purine permease 4	0.473228	1.0422	0.627307	2.32864	2.3201	2.42215	1.7567	1.26739e-05	0.000377377	0.714246	2.35696	up
AT1G31173	MIR167D; miRNA	1.13065	2.52953	0.573641	0.51264	0.497594	0.33164	-1.64051	0.00448529	0.0427228	1.41127	0.447292	down
AT1G31710	Copper amine oxidase family protein	17.159	6.11657	9.31257	7.13604	3.22087	3.92802	-1.1627	0.000932241	0.0131944	10.8627	4.76165	down
AT1G32240	Homeodomain-like superfamily protein	3.00536	3.52902	2.5338	1.95539	1.07988	0.715122	-1.2827	0.000524063	0.00854416	3.02272	1.25013	down
AT1G32700	PLATZ transcription factor family protein	54.2918	62.9187	68.0866	22.946	20.3724	31.5411	-1.2528	3.60659e-07	1.67415e-05	61.7657	24.9532	down
AT1G32900	UDP-Glycosyltransferase superfamily protein	13.6699	9.24183	11.2356	3.71606	2.2728	2.41401	-1.99836	5.73559e-17	1.71745e-14	11.3825	2.80096	down
AT1G32920		361.671	269.947	413.09	737.191	945.93	701.777	1.22598	7.91853e-09	5.51944e-07	348.236	794.966	up
AT1G33260	Protein kinase superfamily protein	12.0409	14.2755	13.6271	6.35487	3.44866	4.75829	-1.43149	9.03853e-09	6.19869e-07	13.3145	4.85394	down
AT1G33760	Integrase-type DNA-binding superfamily protein	40.4546	21.2596	31.0197	166.783	208.508	94.3665	2.36198	1.8917e-17	6.18732e-15	30.9113	156.552	up
AT1G35140	Phosphate-responsive 1 family protein	315.377	225.766	295.206	760.824	1194.73	568.876	1.62075	7.65914e-11	8.52531e-09	278.783	841.478	up
AT1G36622		42.5394	46.2608	67.8443	76.565	123.388	119.039	1.0761	0.000122648	0.00259971	52.2148	106.33	up
AT1G36920		0	0	0	8.04121	7.49989	3.06004	8.86715	2.80836e-12	4.11764e-10	0	6.20038	up
AT1G36922		0	0	0	7.19735	5.97297	4.6686	8.64074	5.49359e-12	7.8385e-10	0	5.94631	up
AT1G42980	Actin-binding FH2 (formin homology 2) family protein	6.74681	3.53789	4.22724	11.5221	11.4545	8.39553	1.14833	2.86224e-05	0.000777154	4.83731	10.4574	up
AT1G43675	transposable element gene	6.10492	6.81302	5.29134	17.6779	13.921	10.2985	1.21692	7.79406e-05	0.00177601	6.06976	13.9658	up
AT1G45010	TRAM, LAG1 and CLN8 (TLC) lipid-sensing domain containing protein	11.6656	19.7733	18.3952	5.33035	5.98042	3.81415	-1.70733	2.27445e-09	1.85267e-07	16.6114	5.04164	down
AT1G45120	transposable element gene	2.55447	1.88264	2.12688	1.4302	1.24435	0.498012	-1.05189	0.00137945	0.017828	2.188	1.05752	down
AT1G45191	Glycosyl hydrolase superfamily protein	7.52537	7.73086	5.90887	3.8751	2.50082	2.46702	-1.23822	6.96997e-07	3.01182e-05	7.05503	2.94764	down
AT1G45616	receptor like protein 6	1.09725	2.08179	2.75026	0.275641	0.356734	0.304191	-2.63494	4.26795e-10	4.10573e-08	1.97643	0.312189	down
AT1G46768	related to AP2 1	3.33543	4.85634	3.3957	0.836567	0.773346	1.94756	-1.61251	0.000866712	0.0124502	3.86249	1.18582	down
AT1G47400		5.6503	2.29174	3.99946	15.7555	8.33433	8.32733	1.46038	0.000193466	0.00374598	3.9805	10.8057	up
AT1G47840	hexokinase 3	1.92787	1.15285	1.02114	0.248877	0.230069	0.0378835	-3.01099	7.61379e-07	3.25692e-05	1.36729	0.172277	down
AT1G48330		11.4273	17.3996	10.1137	2.76756	1.31378	3.41572	-2.3171	8.62163e-09	5.95116e-07	12.9802	2.49902	down
AT1G48750	Bifunctional inhibitor/lipid-transfer protein/seed storage 2S albumin superfamily protein	13.9942	13.7838	14.95	40.1563	33.1368	55.4269	1.64994	1.18444e-09	1.01129e-07	14.2427	42.9067	up
AT1G49500		30.8037	40.3396	49.2121	55.6421	63.5761	119.677	1.06198	0.00123298	0.0163221	40.1185	79.6316	up
AT1G50420	scarecrow-like 3	11.9556	13.6959	10.5983	3.66902	2.49508	3.72327	-1.82929	8.77753e-14	1.52959e-11	12.0833	3.29579	down
AT1G50750	Plant mobile domain protein family	4.42442	2.15528	3.20754	9.89119	9.55354	4.10728	1.2772	6.91898e-05	0.00159889	3.26242	7.85067	up
AT1G51440	alpha/beta-Hydrolases superfamily protein	6.20941	8.9969	8.13744	3.16279	2.43292	3.56682	-1.30564	2.56639e-06	9.50546e-05	7.78125	3.05418	down
AT1G51500	ABC-2 type transporter family protein	41.1235	52.4832	40.7701	21.6061	17.7161	10.2542	-1.43564	7.90696e-10	6.97058e-08	44.7923	16.5255	down
AT1G51680	4-coumarate:CoA ligase 1	247.999	225.125	257.061	46.2515	32.5762	35.8474	-2.64256	6.20779e-53	2.19963e-49	243.395	38.225	down
AT1G51780	IAA-leucine resistant (ILR)-like gene 5	26.3656	19.9426	54.6492	3.62758	1.56494	2.51549	-3.69848	1.29254e-23	8.86432e-21	33.6525	2.56934	down
AT1G51850	Leucine-rich repeat protein kinase family protein	9.48793	6.30187	9.07129	3.92453	4.94466	1.96053	-1.18788	6.22378e-05	0.00146207	8.28703	3.6099	down
AT1G52030	myrosinase-binding protein 2	41.0287	25.2599	27.7484	10.1972	4.59759	9.94577	-1.87345	3.85732e-10	3.76177e-08	31.3457	8.24686	down
AT1G52040	myrosinase-binding protein 1	544.267	481.58	566.898	219.475	216.486	252.255	-1.16298	4.46757e-10	4.27841e-08	530.915	229.406	down
AT1G52342		1.37509	3.70033	2.97959	5.432	5.39072	8.81565	1.33845	0.00403137	0.0394417	2.685	6.54612	up
AT1G52400	beta glucosidase 18	1983.69	1669.38	1802.38	725.131	700.6	752.64	-1.27989	7.75721e-15	1.75445e-12	1818.48	726.124	down
AT1G52410	TSK-associating protein 1	296.445	226.863	287.932	115.995	98.8024	153.091	-1.08197	3.6581e-06	0.000127794	270.414	122.629	down
AT1G52760	lysophospholipase 2	80.8965	78.777	87.6131	26.3913	23.2426	30.4631	-1.57839	7.04453e-15	1.62928e-12	82.4289	26.699	down
AT1G52770	Phototropic-responsive NPH3 family protein	11.4826	11.6613	6.67943	4.20228	2.27344	3.81617	-1.48927	8.87832e-07	3.76002e-05	9.9411	3.43063	down
AT1G52855		7.12333	6.89211	10.475	5.20752	2.20068	2.49127	-1.31122	0.00080257	0.0117917	8.16349	3.29982	down
AT1G53500	NAD-dependent epimerase/dehydratase family protein	51.9178	63.9618	61.8412	34.1688	23.3211	19.1881	-1.20488	4.84891e-09	3.61712e-07	59.2403	25.5593	down
AT1G53690	DNA directed RNA polymerase, 7 kDa subunit	1.26459	1.01455	3.75793	6.54872	4.34633	10.9907	1.9103	0.00335047	0.0346286	2.01236	7.29525	up
AT1G53700	WAG 1	1.27286	1.54338	1.75513	0.161331	0.149139	0.184181	-3.16264	4.14858e-09	3.12761e-07	1.52379	0.164884	down
AT1G53920	GDSL-motif lipase 5	9.44934	16.3092	9.79531	5.58596	3.11778	5.37443	-1.2987	5.16263e-05	0.00126158	11.8513	4.69273	down
AT1G54000	GDSL-like Lipase/Acylhydrolase superfamily protein	2.72331	1.44185	2.1458	1.35512	0.827262	0.622712	-1.16134	0.00386766	0.0384497	2.10366	0.935031	down
AT1G54010	GDSL-like Lipase/Acylhydrolase superfamily protein	23.955	20.378	26.4129	3.85591	2.92129	3.15535	-2.80183	3.23046e-39	6.24359e-36	23.582	3.31085	down
AT1G54020	GDSL-like Lipase/Acylhydrolase superfamily protein	23.4984	18.2884	41.4591	4.06906	3.89985	4.9414	-2.64527	3.58029e-17	1.10314e-14	27.7486	4.30344	down
AT1G54540	Late embryogenesis abundant (LEA) hydroxyproline-rich glycoprotein family	1.69247	0.0960083	0.355617	0	0	0	-6.44011	0.000123531	0.00261526	0.714699	0	down
AT1G55850	cellulose synthase like E1	12.832	11.3832	10.0097	32.0428	45.156	28.0591	1.65611	5.95298e-15	1.42254e-12	11.4083	35.086	up
AT1G55990	glycine-rich protein	4.10992	0.394548	1.09606	0	0	0	-6.79188	1.51063e-05	0.000443591	1.86684	0	down
AT1G56020		2.64808	4.98665	3.03291	1.43578	1.19184	1.36037	-1.38627	0.000130358	0.00273314	3.55588	1.32933	down
AT1G56060		42.1289	32.686	42.0577	83.6941	98.129	84.5965	1.22932	7.87766e-10	6.97058e-08	38.9575	88.8065	up
AT1G56430	nicotianamine synthase 4	7.00278	4.7801	6.43841	13.6652	9.24166	14.5059	1.08788	7.18745e-05	0.00165016	6.07377	12.4709	up
AT1G56520	Disease resistance protein (TIR-NBS-LRR class) family	12.4941	6.80171	8.19325	23.6007	28.124	10.2987	1.1884	0.000105506	0.00228847	9.16303	20.6745	up
AT1G57850	Toll-Interleukin-Resistance (TIR) domain family protein	40.4563	36.3034	41.8204	72.188	95.1159	96.8861	1.2085	6.7847e-08	3.7176e-06	39.5267	88.0633	up
AT1G58170	Disease resistance-responsive (dirigent-like protein) family protein	3.87047	6.71956	6.11415	2.32098	1.28735	1.81064	-1.60355	5.49751e-05	0.00132364	5.56806	1.80632	down
AT1G60060	Serine/threonine-protein kinase WNK (With No Lysine)-related	2.11629	2.80145	1.88667	0.646316	0.857243	0.748549	-1.54972	6.6373e-05	0.00153881	2.26814	0.750703	down
AT1G60140	trehalose phosphate synthase	9.89042	10.2318	8.32848	5.79299	4.00129	3.39382	-1.0937	1.85704e-07	9.24605e-06	9.48356	4.39604	down
AT1G61120	terpene synthase 04	165.913	83.0838	194.934	54.8336	52.3427	28.481	-1.70019	7.94426e-09	5.51944e-07	147.977	45.2191	down
AT1G61460	S-locus protein kinase, putative	8.33847	6.18609	8.07313	16.7422	22.3328	11.095	1.17206	2.01865e-06	7.82528e-05	7.53257	16.7233	up
AT1G61470	Polynucleotidyl transferase, ribonuclease H-like superfamily protein	5.55242	3.1182	2.42915	11.2556	18.1292	8.1176	1.79613	6.9565e-07	3.01182e-05	3.69992	12.5008	up
AT1G61580	R-protein L3 B	19.7114	23.1615	18.0478	74.2879	71.4826	76.8894	1.91184	2.96481e-24	2.33451e-21	20.3069	74.22	up
AT1G61800	glucose-6-phosphate/phosphate translocator 2	65.9256	55.2104	68.4114	10.6192	8.58048	8.70075	-2.73301	1.99729e-53	1.06156e-49	63.1824	9.30013	down
AT1G61810	beta-glucosidase 45	0.409347	0.574718	0.310446	0.14268	0.0659487	0.0180987	-2.56437	0.00371454	0.0372505	0.431504	0.0755758	down
AT1G62050	Ankyrin repeat family protein	7.67238	7.90873	5.82083	3.83424	1.60957	1.28288	-1.68118	4.70498e-07	2.11476e-05	7.13398	2.24223	down
AT1G62320	ERD (early-responsive to dehydration stress) family protein	9.27367	8.26758	11.3094	4.59479	4.03353	4.81182	-1.06076	3.42178e-06	0.000121245	9.61688	4.48005	down
AT1G62560	flavin-monooxygenase glucosinolate S-oxygenase 3	25.4162	26.234	27.2625	70.9237	55.9597	49.1515	1.17813	1.76153e-12	2.65604e-10	26.3042	58.6783	up
AT1G62800	aspartate aminotransferase 4	5.05921	3.87691	4.20548	9.62486	9.15171	7.11608	1.00757	4.02858e-06	0.000137919	4.38054	8.63088	up
AT1G62870		1.15925	1.59743	1.04662	0.359165	0.179846	0.318916	-2.10932	7.39546e-07	3.17631e-05	1.26777	0.285976	down
AT1G62975	basic helix-loop-helix (bHLH) DNA-binding superfamily protein	4.73202	3.09275	4.87925	0.75833	0.350511	0.634872	-2.82641	1.30608e-11	1.75636e-09	4.23467	0.581238	down
AT1G64200	vacuolar H+-ATPase subunit E isoform 3	227.286	221.252	211.971	109.119	77.4772	97.3008	-1.18132	7.63524e-11	8.52531e-09	220.17	94.6322	down
AT1G65450	HXXXD-type acyl-transferase family protein	3.46704	6.07151	3.51391	1.16947	1.08109	1.22632	-1.86828	5.60576e-08	3.13628e-06	4.35082	1.15896	down
AT1G65880	benzoyloxyglucosinolate 1	0.557057	0.4266	0.526712	0.0235351	0.0435131	0.107474	-2.98316	0.000464482	0.00770709	0.503456	0.058174	down
AT1G65890	acyl activating enzyme 12	25.6464	15.4224	25.5549	10.8722	7.02951	5.12092	-1.52675	1.24792e-08	8.18852e-07	22.2079	7.67422	down
AT1G66020	Terpenoid cyclases/Protein prenyltransferases superfamily protein	0	0	0	0.163902	0.113637	0.124744	5.1761	0.00361517	0.0364777	0	0.134094	up
AT1G66100	Plant thionin	275.874	241.128	281	55.056	40.9645	35.724	-2.57946	4.14365e-49	1.25849e-45	266.001	43.9148	down
AT1G66230	myb domain protein 20	12.1288	12.6448	12.5825	5.65406	3.7838	7.57688	-1.07414	0.000293962	0.00530529	12.4521	5.67158	down
AT1G66370	myb domain protein 113	7.58584	6.98846	6.31605	1.05486	1.43705	0.591566	-2.74898	4.09577e-13	6.80282e-11	6.96345	1.02782	down
AT1G66725	MIR163; miRNA	11.9623	5.40073	10.1242	2.22375	1.39062	3.4845	-1.8719	1.65619e-05	0.000479709	9.16243	2.36629	down
AT1G66820	glycine-rich protein	20.4879	24.6785	16.4838	41.8625	38.4018	51.9196	1.15472	5.20093e-06	0.000174115	20.5501	44.0613	up
AT1G66960	Terpenoid cyclases family protein	2.26419	1.14597	1.52635	1.04446	0.475561	0.427126	-1.33693	0.00106261	0.0146126	1.6455	0.64905	down
AT1G67070	Mannose-6-phosphate isomerase, type I	2.37743	2.81707	1.90715	1.38699	0.673682	0.644107	-1.39027	0.0002499	0.00464819	2.36722	0.901591	down
AT1G67810	sulfur E2	8.0614	4.46956	8.27769	15.988	19.2799	18.9245	1.43048	4.42211e-07	1.99182e-05	6.93622	18.0641	up
AT1G67880	beta-1,4-N-acetylglucosaminyltransferase family protein	14.6896	9.31158	12.1144	28.9377	38.2659	18.1854	1.26446	1.19304e-06	4.85903e-05	12.0385	28.463	up
AT1G68130	indeterminate(ID)-domain 14	7.00597	6.95629	6.40054	2.81596	2.21675	3.95152	-1.11647	0.000111808	0.00239863	6.7876	2.99474	down
AT1G68470	Exostosin family protein	4.8891	2.61109	3.29033	2.05831	1.21085	1.44449	-1.16072	0.000633728	0.00991395	3.59684	1.57121	down
AT1G68490		29.5623	39.6614	32.9393	16.5542	12.5441	18.0558	-1.07179	4.57404e-06	0.000154847	34.0543	15.718	down
AT1G68500		17.1304	31.9863	20.7261	6.70839	4.48296	13.9022	-1.39522	0.000919185	0.0130366	23.2809	8.36452	down
AT1G68520	B-box type zinc finger protein with CCT domain	70.9391	125.71	69.2731	30.5194	17.4902	29.0743	-1.74984	1.38821e-09	1.15738e-07	88.6409	25.6946	down
AT1G69140		1.75538	1.87774	0.869399	6.87599	3.44752	4.61235	1.76267	0.00110888	0.0150349	1.50084	4.97862	up
AT1G69160		2.80049	3.46485	1.72979	0.807828	0.110634	0.774229	-2.18607	0.000106332	0.00230206	2.66504	0.56423	down
AT1G69170	Squamosa promoter-binding protein-like (SBP domain) transcription factor family protein	4.98508	5.6173	4.55145	2.67665	2.03772	1.93445	-1.16397	2.40499e-06	9.01764e-05	5.05127	2.21627	down
AT1G69320	CLAVATA3/ESR-RELATED 10	0.745586	1.14195	0.704972	0.252002	0	0	-3.4846	0.0044109	0.0421843	0.864171	0.0840008	down
AT1G69870	nitrate transporter 1.7	253.595	273.552	289.106	133.1	108.475	85.7831	-1.30213	2.484e-14	4.98206e-12	272.084	109.12	down
AT1G70740	Protein kinase superfamily protein	25.4505	15.8885	22.7285	49.8476	69.5668	35.9399	1.30525	1.69746e-07	8.55165e-06	21.3558	51.7848	up
AT1G70830	MLP-like protein 28	417.211	250.303	354.513	168.071	103.893	192.203	-1.08172	5.61016e-05	0.00134014	340.676	154.722	down
AT1G70985	hydroxyproline-rich glycoprotein family protein	0.144172	0.269886	0.562313	1.34005	2.10592	1.68282	2.40955	0.00108917	0.014872	0.325457	1.7096	up
AT1G71020	ARM repeat superfamily protein	3.80221	6.11566	2.91156	2.5562	1.04671	1.4885	-1.32089	0.000263705	0.00484652	4.27648	1.69714	down
AT1G71030	MYB-like 2	5.43159	7.31075	5.91385	3.62995	3.3942	1.87356	-1.06428	0.000673559	0.0103617	6.21873	2.9659	down
AT1G71400	receptor like protein 12	0.881049	0.329861	0.666445	1.32516	3.63374	1.63183	1.8613	4.5223e-05	0.0011405	0.625785	2.19691	up
AT1G71692	AGAMOUS-like 12	0.368157	0.0765759	0.283639	0	0	0	-5.23914	0.00510918	0.0472677	0.242791	0	down
AT1G71880	sucrose-proton symporter 1	152.365	195.909	191.356	93.0256	82.0099	72.4334	-1.10192	5.88606e-10	5.44076e-08	179.877	82.4896	down
AT1G71900	Protein of unknown function (DUF803)	14.8805	16.8753	16.3969	9.53546	8.6403	4.31129	-1.0981	1.52209e-05	0.000446341	16.0509	7.49569	down
AT1G72130	Major facilitator superfamily protein	10.1337	12.4172	10.2231	5.29408	4.60851	4.01248	-1.21137	3.99511e-09	3.02263e-07	10.9246	4.63836	down
AT1G72140	Major facilitator superfamily protein	0.33048	0.220947	0.470577	0.109705	0.0202829	0.0166991	-2.86417	0.00419407	0.0406318	0.340668	0.0488957	down
AT1G72240		4.26329	3.55508	3.76232	12.8966	17.8497	10.8025	1.8748	3.37959e-10	3.35772e-08	3.86023	13.8496	up
AT1G72910	Toll-Interleukin-Resistance (TIR) domain-containing protein	7.57419	2.85909	3.32292	31.4919	44.3242	16.1625	2.77166	3.23219e-14	6.36262e-12	4.5854	30.6595	up
AT1G72920	Toll-Interleukin-Resistance (TIR) domain family protein	4.79836	2.28432	2.68894	16.5327	18.3044	9.71511	2.21816	1.16205e-12	1.84368e-10	3.25721	14.8507	up
AT1G72940	Toll-Interleukin-Resistance (TIR) domain-containing protein	15.9629	8.96465	10.9427	34.8808	38.0055	27.3687	1.5199	2.03562e-11	2.60706e-09	11.9567	33.4183	up
AT1G72950	Disease resistance protein (TIR-NBS class)	1.25394	0.856466	0.822467	3.05553	3.55261	2.58925	1.68955	2.02073e-06	7.82528e-05	0.977624	3.0658	up
AT1G73325	Kunitz family trypsin and protease inhibitor protein	34.6676	53.1932	36.4126	27.6722	12.8473	19.5166	-1.02941	0.000330558	0.00583693	41.4245	20.012	down
AT1G73330	drought-repressed 4	3.14251	7.70553	4.06639	0.246836	0.418335	0.250486	-4.00012	6.90144e-15	1.62928e-12	4.97148	0.305219	down
AT1G73480	alpha/beta-Hydrolases superfamily protein	112.964	92.5263	100.223	50.0775	47.8225	49.6918	-1.00772	7.93453e-10	6.97058e-08	101.904	49.1972	down
AT1G73510		4.1288	1.28817	1.43143	10.8477	4.44634	6.42571	1.70609	0.000203847	0.00391843	2.2828	7.23992	up
AT1G73540	nudix hydrolase homolog 21	121.881	77.0308	91.7287	366.906	486.798	378.774	2.13087	7.99495e-24	5.66575e-21	96.88	410.826	up
AT1G74090	desulfo-glucosinolate sulfotransferase 18	48.4973	41.4276	43.5269	91.6592	68.7803	100.462	1.01694	1.37983e-06	5.52453e-05	44.4839	86.9673	up
AT1G74450	Protein of unknown function (DUF793)	238.763	203.023	257.235	420.611	556.978	396.402	1.00962	1.75863e-07	8.81801e-06	233.007	457.997	up
AT1G74460	GDSL-like Lipase/Acylhydrolase superfamily protein	1.20165	0.062485	0.231446	0	0	0	-6.53863	9.0158e-05	0.00200708	0.498526	0	down
AT1G74550	cytochrome P450, family 98, subfamily A, polypeptide 9	1.67272	2.48516	2.1632	4.04731	3.69582	6.32977	1.21512	0.00038885	0.00666152	2.10702	4.69096	up
AT1G74650	myb domain protein 31	0.291765	0.327707	0.505764	1.81697	2.15598	1.56863	2.31753	2.94636e-07	1.39509e-05	0.375078	1.84719	up
AT1G74930	Integrase-type DNA-binding superfamily protein	26.5178	7.80716	11.4084	92.7205	68.8939	52.2869	2.26027	4.72231e-11	5.57757e-09	15.2445	71.3004	up
AT1G74940	Protein of unknown function (DUF581)	11.2944	14.6215	16.6544	5.65794	2.26859	4.92878	-1.69697	2.78491e-07	1.32455e-05	14.1901	4.28511	down
AT1G75230	DNA glycosylase superfamily protein	36.43	32.9827	37.6983	86.2345	93.6377	61.0559	1.19191	4.98334e-11	5.81546e-09	35.7036	80.3094	up
AT1G75450	cytokinin oxidase 5	31.7221	31.7698	43.7677	11.791	10.8718	12.2309	-1.58231	1.00813e-13	1.74251e-11	35.7532	11.6313	down
AT1G75750	GAST1 protein homolog 1	251.496	172.356	319.954	798.178	489.492	611.663	1.37862	3.49625e-08	1.99813e-06	247.935	633.111	up
AT1G75880	SGNH hydrolase-type esterase superfamily protein	4.10634	2.93396	3.01573	2.12689	1.48136	1.15309	-1.0625	0.00101252	0.0140603	3.35201	1.58711	down
AT1G75890	GDSL-like Lipase/Acylhydrolase superfamily protein	0.698853	0.763139	0.504766	0.108262	0.13344	0	-3.07364	0.00132196	0.0172741	0.655586	0.0805672	down
AT1G76240	Arabidopsis protein of unknown function (DUF241)	5.2211	4.8869	5.27952	2.20587	1.12154	1.81877	-1.546	2.54235e-06	9.44937e-05	5.12917	1.71539	down
AT1G76600		86.2113	53.3196	63.3497	157.73	234.455	147.468	1.45298	5.23069e-10	4.87739e-08	67.6269	179.884	up
AT1G76610	Protein of unknown function, DUF617	3.68839	4.74691	4.39567	1.28561	2.02477	2.28307	-1.1351	0.00324882	0.0338412	4.27699	1.86448	down
AT1G76650	calmodulin-like 38	444.221	316.263	444.412	766.81	1019.34	1068.07	1.30078	1.50804e-08	9.68607e-07	401.632	951.409	up
AT1G76952	inflorescence deficient in abscission (IDA)-like 5	4.33533	4.34093	6.81607	0.655981	1.29945	1.28381	-2.19672	2.33535e-05	0.000653283	5.16411	1.07975	down
AT1G77640	Integrase-type DNA-binding superfamily protein	6.45763	5.51485	8.21172	22.6508	36.6534	14.6384	1.88773	1.54519e-09	1.27824e-07	6.72807	24.6475	up
AT1G77680	Ribonuclease II/R family protein	69.878	75.2719	76.874	35.0423	23.2672	22.2415	-1.44693	4.92169e-15	1.2027e-12	74.008	26.8503	down
AT1G77740	phosphatidylinositol-4-phosphate 5-kinase 2	31.6781	35.777	33.016	19.3651	11.9109	9.38858	-1.30199	6.09902e-09	4.39543e-07	33.4903	13.5549	down
AT1G77855		2.59013	1.56869	2.07988	4.4609	3.43648	4.60769	1.05417	0.00136289	0.0176569	2.07956	4.16836	up
AT1G78100	F-box family protein	62.2941	80.2148	81.7598	29.0286	34.1351	43.6878	-1.01447	4.20373e-05	0.00107417	74.7562	35.6171	down
AT1G78170		5.82124	11.8429	3.29415	0.983768	0.16535	0.816802	-3.37568	1.58889e-09	1.3093e-07	6.98609	0.655307	down
AT1G78210	alpha/beta-Hydrolases superfamily protein	42.2631	44.3972	46.1705	22.7177	15.2795	18.0106	-1.21798	4.22814e-10	4.08627e-08	44.2769	18.6693	down
AT1G78290	Protein kinase superfamily protein	7.73176	7.72841	6.2209	16.3256	14.791	19.1126	1.26483	2.57244e-08	1.55899e-06	7.22703	16.743	up
AT1G78310	VQ motif-containing protein	4.78066	7.2602	6.31138	2.29533	2.23068	3.15795	-1.20324	0.000120385	0.00256195	6.11741	2.56132	down
AT1G78490	cytochrome P450, family 708, subfamily A, polypeptide 3	60.3266	37.857	48.0058	26.0701	19.7086	14.5655	-1.2584	1.03266e-08	6.99322e-07	48.7298	20.1147	down
AT1G78730	FBD, F-box, Skp2-like and Leucine Rich Repeat domains containing protein	1.25207	0.966839	1.05808	2.73487	2.23234	1.79361	1.0679	0.00235612	0.0270566	1.09233	2.25361	up
AT1G79110	zinc ion binding	46.129	62.1414	47.7992	9.70099	6.69823	13.1943	-2.34013	8.79629e-17	2.56177e-14	52.0232	9.86449	down
AT1G79160		63.4587	72.9485	66.8757	10.6043	5.51166	22.1703	-2.32029	0.000288752	0.00523794	67.761	12.7621	down
AT1G79170		2.43	2.59938	3.15924	0.483993	0.447417	0.245574	-2.80084	0.0014441	0.0184868	2.72954	0.392328	down
AT1G79180	myb domain protein 63	0.756253	0.409805	0.896958	0.147983	0.0342	0.0563143	-3.12725	0.000771976	0.011463	0.687672	0.0794992	down
AT1G79960	ovate family protein 14	2.95071	1.77881	1.86393	5.62471	4.51208	4.88235	1.23333	0.000209579	0.0040141	2.19782	5.00638	up
AT1G80050	adenine phosphoribosyl transferase 2	3.86487	3.17149	3.57925	9.94038	5.68637	8.16476	1.1989	8.06499e-05	0.00182795	3.53854	7.9305	up
AT1G80080	Leucine-rich repeat (LRR) family protein	0.557791	2.87148	1.08778	0.518455	0.143782	0.41432	-2.04982	0.00195774	0.0233697	1.50568	0.358852	down
AT1G80510	Transmembrane amino acid transporter family protein	13.6764	13.8873	13.2739	6.72613	5.57258	5.15138	-1.19955	3.49286e-11	4.26772e-09	13.6125	5.8167	down
AT1G80520	Sterile alpha motif (SAM) domain-containing protein	12.6132	11.3049	11.5285	6.53683	3.61256	5.51588	-1.14128	0.000126533	0.00266875	11.8155	5.22176	down
AT1G80760	NOD26-like intrinsic protein 6;1	10.4444	9.57073	10.4452	4.92179	2.63577	4.67594	-1.27366	6.91965e-06	0.000222897	10.1534	4.07784	down
AT1G80850	DNA glycosylase superfamily protein	14.9125	12.2318	13.9724	25.2984	23.6871	35.427	1.09927	7.55647e-06	0.000240855	13.7056	28.1375	up
AT2G01008		0.785904	0.534981	0.619245	1.49417	1.93375	2.57764	1.70453	0.000242856	0.00456106	0.64671	2.00185	up
AT2G01150	RING-H2 finger protein 2B	179.028	200.339	250.872	52.6992	50.0637	93.3038	-1.61734	3.48582e-08	1.99813e-06	210.08	65.3556	down
AT2G01180	phosphatidic acid phosphatase 1	123.521	74.4534	103.159	214.786	294.73	175.274	1.21937	1.4094e-07	7.22022e-06	100.378	228.263	up
AT2G01280	Cyclin/Brf1-like TBP-binding protein	6.54988	4.90082	5.60901	12.3947	10.0426	15.9953	1.23222	1.38504e-06	5.53497e-05	5.68657	12.8108	up
AT2G01422		0	0	0	35.9129	34.347	42.0233	11.9857	2.11993e-23	1.36575e-20	0	37.4277	up
AT2G01610	Plant invertase/pectin methylesterase inhibitor superfamily protein	3.1335	2.01639	3.01296	0.910163	0.841381	0.450265	-1.88387	4.17932e-05	0.00107051	2.72095	0.733937	down
AT2G02060	Homeodomain-like superfamily protein	1.54698	2.45348	2.1602	0.479294	0.996914	0.455982	-1.65087	0.00108846	0.014872	2.05355	0.644063	down
AT2G02310	phloem protein 2-B6	15.7116	7.66679	12.7044	24.3987	22.7195	23.4492	1.01393	9.95595e-05	0.00218887	12.0276	23.5224	up
AT2G04090	MATE efflux family protein	0.77163	0.115558	0.214015	0	0	0	-6.21955	0.00014786	0.00302551	0.367068	0	down
AT2G04240	RING/U-box superfamily protein	30.0147	37.7852	25.1935	9.43564	5.26262	11.5381	-1.76846	4.70528e-09	3.52233e-07	30.9978	8.74544	down
AT2G04790		4.64315	4.74103	3.60626	8.79957	8.39364	8.48888	1.026	0.000178664	0.00354342	4.33015	8.5607	up
AT2G05100	photosystem II light harvesting complex gene 2.1	489.842	691.099	368.779	251.358	234.193	257.141	-1.01915	1.49769e-05	0.000440875	516.574	247.564	down
AT2G05350		0	0	0	0.490403	0.251857	0.0829424	5.73851	0.00063345	0.00991395	0	0.275068	up
AT2G05440	GLYCINE RICH PROTEIN 9	69.8308	55.5597	116.459	49.288	30.8114	29.2435	-1.13796	6.89717e-05	0.00159558	80.6164	36.4477	down
AT2G06255	ELF4-like 3	4.02942	2.71077	4.58382	1.63855	1.24424	1.29162	-1.41128	0.000716755	0.0109078	3.77467	1.39147	down
AT2G06550	transposable element gene	0.833983	0.3903	0.67121	0	0.051185	0.0842819	-3.65156	0.0040396	0.0394907	0.631831	0.0451556	down
AT2G07213	other RNA	0.432623	0.124594	0.0576875	1.97964	2.43052	1.71856	3.39645	1.30786e-08	8.55543e-07	0.204968	2.04291	up
AT2G07215		0.479791	0	0.0519813	3.90211	4.94705	2.12132	4.44661	3.07276e-09	2.42851e-07	0.177257	3.65683	up
AT2G07667		0.265299	0.372476	0.383239	0.863064	1.13977	1.59525	1.88002	0.00292087	0.0312835	0.340338	1.19936	up
AT2G11320	transposable element gene	0.0520637	0.0426398	0.0282034	0	0	0	-5.32615	0.00285322	0.0308852	0.040969	0	down
AT2G15000		11.0501	12.4904	10.2578	21.3274	21.0127	23.5792	1.00968	7.15656e-06	0.000229485	11.2661	21.9731	up
AT2G17040	NAC domain containing protein 36	28.6048	25.2113	32.4573	70.6205	77.9992	77.8141	1.43492	3.09311e-13	5.219e-11	28.7578	75.4779	up
AT2G17660	RPM1-interacting protein 4 (RIN4) family protein	116.557	120.822	135.113	207.892	289.949	374.93	1.29377	9.40175e-07	3.93467e-05	124.164	290.924	up
AT2G18700	trehalose phosphatase/synthase 11	17.8624	22.4301	18.7016	7.74302	5.96263	8.36444	-1.37426	6.6692e-10	6.05928e-08	19.6647	7.3567	down
AT2G18780	F-box and associated interaction domains-containing protein	1.39839	1.76547	1.43753	0.45341	0.419145	0.575142	-1.61333	0.000508712	0.00833221	1.53379	0.482566	down
AT2G18790	phytochrome B	29.341	23.43	23.4148	16.3281	12.1534	7.1695	-1.08978	3.0952e-06	0.000111765	25.3953	11.8837	down
AT2G18917	other RNA	10.2263	12.6626	13.5722	8.36649	5.40023	2.18535	-1.21817	0.000913325	0.0129882	12.1537	5.31736	down
AT2G18969		3.26926	9.65074	5.15856	0.779155	0.576219	3.20224	-1.87144	0.00415385	0.040343	6.02618	1.5192	down
AT2G18970		4.75115	9.67423	4.04573	2.32426	1.79051	2.59449	-1.41448	0.00191039	0.0230027	6.15704	2.23642	down
AT2G19650	Cysteine/Histidine-rich C1 domain family protein	5.55849	5.09688	5.50365	1.66379	1.18187	0.399882	-2.33786	1.07693e-10	1.18019e-08	5.38634	1.08185	down
AT2G19800	myo-inositol oxygenase 2	10.6118	13.9244	4.65702	2.74679	1.32731	0.57015	-2.67719	5.35215e-09	3.92368e-07	9.73109	1.54808	down
AT2G19810	CCCH-type zinc finger family protein	12.0529	13.7199	11.067	4.31085	2.73052	4.7999	-1.58667	5.02011e-09	3.73174e-07	12.2799	3.94709	down
AT2G20670	Protein of unknown function (DUF506)	5.41751	7.98724	4.05105	1.44811	1.03443	3.05593	-1.56621	0.000385814	0.00662018	5.8186	1.84615	down
AT2G20721	snoRNA	8.26848	8.64971	7.58813	24.8645	18.3883	17.8919	1.34421	0.00302731	0.0321161	8.16877	20.3816	up
AT2G22900	Galactosyl transferase GMA12/MNN10 family protein	18.146	15.2311	16.8425	7.9524	5.02107	9.53366	-1.10112	4.61772e-05	0.0011577	16.7399	7.50238	down
AT2G22930	UDP-Glycosyltransferase superfamily protein	2.13734	1.77825	1.95542	3.42138	3.67296	4.91396	1.09463	0.000536493	0.00870186	1.957	4.00277	up
AT2G23170	Auxin-responsive GH3 family protein	2.52859	2.32761	1.3041	1.28196	0.897791	0.399145	-1.26099	0.00274744	0.0301397	2.05343	0.859634	down
AT2G23290	myb domain protein 70	10.3041	9.71758	7.88218	13.0238	26.7957	24.7946	1.27943	2.5595e-05	0.000703036	9.30128	21.538	up
AT2G23300	Leucine-rich repeat protein kinase family protein	3.9076	3.78236	3.88248	1.66542	1.29389	1.53722	-1.32548	1.34393e-07	6.93495e-06	3.85748	1.49884	down
AT2G23770	protein kinase family protein / peptidoglycan-binding LysM domain-containing protein	13.2373	14.9581	15.3324	3.42269	4.96319	4.01813	-1.76928	2.84757e-14	5.65788e-12	14.5092	4.13467	down
AT2G23810	tetraspanin8	296.805	199.755	264.923	494.537	652.673	425.241	1.08098	2.40869e-07	1.15857e-05	253.828	524.151	up
AT2G24130	Leucine-rich receptor-like protein kinase family protein	0.0751966	0.267456	0.0521403	0.670979	0.620272	0.265976	1.9741	0.00423621	0.0409372	0.131598	0.519076	up
AT2G24165		0.862221	1.07604	0.871869	2.84948	3.33384	2.9142	1.73333	1.82039e-05	0.000520181	0.93671	3.03251	up
AT2G24210	terpene synthase 10	2.16076	3.6752	6.94749	0.561482	0.0598904	0.328722	-3.75409	1.5733e-11	2.07753e-09	4.26115	0.316698	down
AT2G24850	tyrosine aminotransferase 3	882.168	551.728	707.925	292.861	203.423	218.603	-1.55044	1.9896e-14	4.0672e-12	713.941	238.296	down
AT2G25200	Plant protein of unknown function (DUF868)	8.23279	7.74116	7.0047	11.5836	13.6611	19.262	1.02283	0.000242672	0.00456106	7.65955	14.8356	up
AT2G25460		74.0544	39.7723	54.4778	207.135	243.293	103.315	1.73543	5.08043e-10	4.75815e-08	56.1015	184.581	up
AT2G25680	molybdate transporter 1	0.949928	0.861338	0.771876	3.55934	1.78547	2.12098	1.54967	5.405e-05	0.00130432	0.861047	2.4886	up
AT2G25810	tonoplast intrinsic protein 4;1	1.51838	0.781652	0.888319	0.317542	0.42401	0.187972	-1.75337	0.00455723	0.0432115	1.06278	0.309841	down
AT2G25900	Zinc finger C-x8-C-x5-C-x3-H type family protein	4.03721	3.87152	2.53315	1.86474	0.87255	1.50684	-1.2592	0.000298521	0.00537074	3.48063	1.41471	down
AT2G26010	plant defensin 1.3	0.894155	2.84553	16.9724	78.5388	99.3401	164.271	4.08941	0.000345787	0.00604062	6.90402	114.05	up
AT2G26020	plant defensin 1.2b	7.43063	8.31575	26.7415	44.1423	89.9406	65.5926	2.26293	3.5796e-07	1.66526e-05	14.1626	66.5585	up
AT2G26190	calmodulin-binding family protein	88.9592	46.9594	66.2327	127.833	178.679	92.8638	1.01421	9.60128e-05	0.00211966	67.3838	133.125	up
AT2G26560	phospholipase A 2A	101.12	66.8214	95.1592	122.239	258.269	131.249	1.00003	0.000445796	0.00747447	87.7002	170.586	up
AT2G26695	Ran BP2/NZF zinc finger-like superfamily protein	2.23334	2.40711	2.229	4.96944	7.15251	6.60685	1.49789	2.80119e-05	0.000764484	2.28981	6.24293	up
AT2G27080	Late embryogenesis abundant (LEA) hydroxyproline-rich glycoprotein family	440.825	351.947	445.405	669.386	909.387	1018.36	1.12886	1.21689e-06	4.94667e-05	412.726	865.71	up
AT2G27310	F-box family protein	112.933	68.4342	93.4082	203.577	268.826	221.865	1.38535	2.98009e-10	3.06071e-08	91.5917	231.423	up
AT2G27390	proline-rich family protein	0.437143	0.10229	0.663051	2.74263	3.19268	1.08235	2.53288	0.00229589	0.0266143	0.400828	2.33922	up
AT2G27770	Plant protein of unknown function (DUF868)	3.20401	5.52014	4.22697	0.790635	0.609072	1.1032	-2.31372	8.91599e-10	7.73689e-08	4.31704	0.834301	down
AT2G27820	prephenate dehydratase 1	21.7084	39.9568	30.9975	8.84456	6.17588	7.53434	-2.01339	1.93812e-14	4.00043e-12	30.8875	7.51826	down
AT2G28140	Protein of unknown function (DUF1635)	5.93232	10.1942	8.3955	1.72312	1.55308	3.96712	-1.67576	7.57951e-05	0.00173269	8.17401	2.41444	down
AT2G28550	related to AP2.7	72.9323	84.3986	77.4677	28.5094	18.6657	26.9867	-1.62489	1.88394e-14	3.92672e-12	78.2662	24.7206	down
AT2G28630	3-ketoacyl-CoA synthase 12	1.12547	1.52639	1.19446	8.19799	9.96646	3.81838	2.51751	5.7988e-14	1.06278e-11	1.28211	7.32761	up
AT2G28650	exocyst subunit exo70 family protein H8	9.11387	7.21811	10.3298	5.36506	3.33318	4.2982	-1.0068	5.70588e-05	0.00135842	8.88728	4.33215	down
AT2G28670	Disease resistance-responsive (dirigent-like protein) family protein	2.56622	2.40196	1.90321	0.639345	1.09113	1.31007	-1.09793	0.00539218	0.0490114	2.29046	1.01352	down
AT2G28930	protein kinase 1B	20.6274	35.0779	30.0683	7.10007	5.80527	13.6363	-1.62043	3.09671e-06	0.000111765	28.5912	8.8472	down
AT2G29460	glutathione S-transferase tau 4	97.1683	50.1155	100.606	38.4603	43.4034	28.5114	-1.13971	1.56408e-05	0.00045802	82.6298	36.7917	down
AT2G29970	Double Clp-N motif-containing P-loop nucleoside triphosphate hydrolases superfamily protein	26.2577	29.3231	27.3237	14.2125	10.2675	11.5214	-1.1743	5.72789e-11	6.58243e-09	27.6348	12.0005	down
AT2G30020	Protein phosphatase 2C family protein	192.48	139.441	200.184	432.257	530.392	383.344	1.37265	6.91564e-12	9.6728e-10	177.369	448.664	up
AT2G30040	mitogen-activated protein kinase kinase kinase 14	161.218	148.685	170.686	281.608	337.273	314.158	1.00076	3.03839e-08	1.79434e-06	160.196	311.013	up
AT2G30490	cinnamate-4-hydroxylase	335.478	326.182	389.005	58.8227	45.4129	58.4363	-2.65191	8.19095e-43	1.7414e-39	350.222	54.224	down
AT2G30760		43.9434	50.0398	34.0997	142.587	57.1138	82.4853	1.15457	9.91473e-05	0.00218206	42.6943	94.062	up
AT2G30766		32.1462	32.6778	20.0079	95.4008	45.0792	61.8117	1.27889	5.19306e-06	0.000174115	28.2773	67.4306	up
AT2G30840	2-oxoglutarate (2OG) and Fe(II)-dependent oxygenase superfamily protein	0.422873	0.461772	0.366518	1.24466	1.27172	1.27138	1.64157	0.0011535	0.0155212	0.417054	1.26259	up
AT2G31380	salt tolerance homologue	7.39645	8.32234	8.08164	3.54713	2.70439	3.47897	-1.25074	1.88362e-06	7.34784e-05	7.93348	3.2435	down
AT2G31560	Protein of unknown function (DUF1685)	29.1216	32.0793	32.1356	15.1789	11.8939	16.9817	-1.03684	2.98113e-06	0.00010834	31.1122	14.6848	down
AT2G31790	UDP-Glycosyltransferase superfamily protein	40.8372	37.384	33.6994	77.6067	63.2206	78.9592	1.01922	4.01206e-08	2.28383e-06	37.3069	73.2622	up
AT2G32130	Plant protein of unknown function (DUF641)	8.43719	2.78341	5.57451	17.3557	22.1052	27.0544	2.06123	1.65308e-08	1.05466e-06	5.59837	22.1718	up
AT2G32240		189.738	116.201	173.384	95.3736	92.9623	39.8653	-1.06519	0.000109582	0.00235801	159.774	76.0671	down
AT2G32510	mitogen-activated protein kinase kinase kinase 17	45.8428	29.0622	53.3437	20.4043	9.99191	14.0465	-1.50643	1.12529e-07	5.93641e-06	42.7496	14.8142	down
AT2G32990	glycosyl hydrolase 9B8	30.0222	18.2219	20.2524	15.7532	9.80376	7.04576	-1.06077	5.91464e-05	0.00140028	22.8322	10.8676	down
AT2G33320	Calcium-dependent lipid-binding (CaLB domain) family protein	10.544	10.4496	10.3036	4.86819	4.27824	4.98486	-1.1042	1.94236e-08	1.20744e-06	10.4324	4.71043	down
AT2G33380	Caleosin-related family protein	346.624	346.94	312.087	164.857	91.5738	181.967	-1.14672	8.48796e-06	0.000268134	335.217	146.133	down
AT2G33480	NAC domain containing protein 41	14.6132	15.2545	13.0672	6.8109	5.7896	6.70306	-1.11113	4.09562e-07	1.86852e-05	14.3116	6.43452	down
AT2G33750	purine permease 2	0.354653	0.165976	0.30739	1.21968	0.670408	1.43006	2.06435	0.00100593	0.0140052	0.276006	1.10671	up
AT2G33830	Dormancy/auxin associated family protein	129.246	141.197	131.544	222.859	269.082	300.88	1.03297	8.35351e-07	3.55903e-05	133.996	264.273	up
AT2G33850		0.447983	0.503169	0.271797	0	0	0	-5.86235	0.000316709	0.00565343	0.40765	0	down
AT2G33890	pre-tRNA	0	0	0.532809	11.999	23.2408	12.6113	6.31569	3.34217e-06	0.000119099	0.177603	15.9504	up
AT2G34070	TRICHOME BIREFRINGENCE-LIKE 37	64.9752	63.8123	60.1577	29.2954	18.0102	25.3229	-1.34344	9.60883e-11	1.05846e-08	62.9817	24.2095	down
AT2G34080	Cysteine proteinases superfamily protein	2.32781	0.726269	1.98957	0.390659	0.305577	0.686138	-1.77915	0.0019305	0.0231617	1.68121	0.460791	down
AT2G34430	light-harvesting chlorophyll-protein complex II subunit B1	979.575	1281.87	793.923	369.03	318.92	529.239	-1.26599	1.99526e-06	7.7549e-05	1018.46	405.73	down
AT2G34600	jasmonate-zim-domain protein 7	183.123	139.03	227.85	409.692	555.851	489.826	1.44831	6.52086e-10	5.94993e-08	183.334	485.123	up
AT2G34650	Protein kinase superfamily protein	7.91655	9.62313	8.71058	2.89075	2.95939	3.43654	-1.45178	2.40621e-09	1.94509e-07	8.75009	3.09556	down
AT2G34810	FAD-binding Berberine family protein	180.374	185.587	183.999	70.6222	61.3285	61.3393	-1.47582	7.32732e-23	4.58173e-20	183.32	64.43	down
AT2G34960	cationic amino acid transporter 5	0.183941	0.0860833	0.219213	0.57702	0.809999	0.618082	2.07221	0.000873766	0.0125431	0.163079	0.668367	up
AT2G35155	Trypsin family protein	7.62778	6.99308	6.35697	4.6175	2.89051	1.75716	-1.18249	3.05106e-05	0.000817978	6.99261	3.08839	down
AT2G35930	plant U-box 23	202.686	114.943	164.23	347.487	459.63	271.392	1.19561	4.27892e-07	1.9438e-05	160.62	359.503	up
AT2G36026	Ovate family protein	2.80638	2.62675	1.32044	0.968862	0.413374	0.453779	-1.86767	0.00346624	0.0354801	2.25119	0.612005	down
AT2G36090	F-box family protein	1.10754	1.30541	1.35103	0.381273	0.387706	0.290183	-1.80887	0.00117677	0.015762	1.25466	0.353054	down
AT2G36320	A20/AN1-like zinc finger family protein	46.7148	67.8029	66.4895	19.3487	17.2415	41.3392	-1.13818	0.000910831	0.0129693	60.3357	25.9764	down
AT2G36400	growth-regulating factor 3	2.32951	5.00209	2.16159	0.738726	0.824189	0.697948	-2.0384	9.90024e-07	4.11896e-05	3.1644	0.753621	down
AT2G36420		11.937	11.0474	9.7068	19.3854	21.6946	23.7677	1.04164	1.23001e-06	4.99047e-05	10.897	21.6159	up
AT2G36430	Plant protein of unknown function (DUF247)	7.88748	7.22327	5.68056	19.9368	24.1835	13.9493	1.50876	6.13101e-11	6.93326e-09	6.93044	19.3565	up
AT2G36590	proline transporter 3	26.5786	28.5868	40.1878	20.2992	13.4309	8.11687	-1.19829	1.84141e-05	0.000525354	31.7844	13.949	down
AT2G36640	embryonic cell protein 63	2.30756	0.910782	1.34942	0.413461	0.143331	0.354016	-2.27138	3.98098e-05	0.00102838	1.52259	0.303603	down
AT2G36690	2-oxoglutarate (2OG) and Fe(II)-dependent oxygenase superfamily protein	0.94481	0.408153	1.13386	1.51993	3.74684	3.0848	1.81028	0.000323602	0.00572837	0.828941	2.78386	up
AT2G36780	UDP-Glycosyltransferase superfamily protein	0.239247	0.497628	0.0921615	0.914209	1.64456	0.601768	1.95426	0.00278561	0.0304015	0.276346	1.05351	up
AT2G36880	methionine adenosyltransferase 3	596.522	632.395	676.872	179.819	155.816	161.39	-1.90619	2.08598e-32	2.60871e-29	635.263	165.675	down
AT2G37040	PHE ammonia lyase 1	186.175	159.848	201.985	46.1802	31.0256	26.3852	-2.39109	1.62103e-33	2.15394e-30	182.669	34.5303	down
AT2G37180	Aquaporin-like superfamily protein	193.327	153.286	175.623	105.664	58.4879	70.0192	-1.13414	8.71931e-08	4.70488e-06	174.079	78.0571	down
AT2G37630	myb-like HTH transcriptional regulator family protein	6.05985	7.25678	4.66011	14.1917	14.1657	13.575	1.26201	2.43471e-08	1.49601e-06	5.99225	13.9775	up
AT2G37770	NAD(P)-linked oxidoreductase superfamily protein	8.47683	5.51156	10.1514	5.95439	2.363	1.39617	-1.34292	0.00109916	0.0149604	8.0466	3.23785	down
AT2G37900	Major facilitator superfamily protein	8.91361	5.84973	6.68231	5.42811	2.92711	1.66701	-1.10635	0.00109721	0.0149531	7.14855	3.34074	down
AT2G38380	Peroxidase superfamily protein	3.56527	0.300635	0.501103	0	0.0275983	0.0227219	-6.28495	1.87948e-06	7.34518e-05	1.45567	0.0167734	down
AT2G38400	alanine:glyoxylate aminotransferase 3	87.2628	91.2323	95.0672	52.3179	35.8275	43.5284	-1.0244	3.08971e-08	1.81456e-06	91.1874	43.8912	down
AT2G38790		32.4551	20.2903	30.6612	55.5535	85.1443	59.3333	1.3052	1.03658e-07	5.49567e-06	27.8022	66.677	up
AT2G39030	Acyl-CoA N-acyltransferases (NAT) superfamily protein	361.115	190.626	317.864	10.6642	13.3262	13.8268	-4.46534	3.89176e-68	2.75796e-64	289.868	12.6057	down
AT2G39310	jacalin-related lectin 22	0.274911	0.36024	0.333584	0	0	0	-6.24129	4.57071e-05	0.00114862	0.322912	0	down
AT2G39330	jacalin-related lectin 23	453.324	290.94	447.978	40.8345	23.9364	35.4687	-3.53401	4.32358e-48	1.14899e-44	397.414	33.4132	down
AT2G39705	ROTUNDIFOLIA like 8	1.59388	3.84439	4.09126	0.455838	0.316042	0.867334	-2.4677	4.12669e-05	0.0010583	3.17651	0.546405	down
AT2G39710	Eukaryotic aspartyl protease family protein	28.7847	32.2474	32.992	14.2038	15.0642	13.0707	-1.11869	4.58201e-10	4.36832e-08	31.3414	14.1129	down
AT2G39720	RING-H2 finger C2A	60.166	67.0952	67.0982	29.5928	26.8381	34.3177	-1.05219	1.97251e-07	9.7073e-06	64.7865	30.2495	down
AT2G40000	ortholog of sugar beet HS1 PRO-1 2	460.439	347.239	398.598	824.494	1096.77	764.485	1.19275	5.04724e-10	4.74798e-08	402.092	895.251	up
AT2G40130	Double Clp-N motif-containing P-loop nucleoside triphosphate hydrolases superfamily protein	14.8507	14.4867	12.2653	4.63275	5.15922	3.59811	-1.60647	2.17951e-17	6.91588e-15	13.8676	4.46336	down
AT2G40160	Plant protein of unknown function (DUF828)	2.57116	2.01367	1.59179	1.02422	1.03699	0.872321	-1.03341	0.00313107	0.0329226	2.05887	0.977842	down
AT2G40180	phosphatase 2C5	3.62626	3.48931	3.46611	1.44901	1.98014	1.00693	-1.23414	0.000224239	0.00424517	3.52723	1.4787	down
AT2G40200	basic helix-loop-helix (bHLH) DNA-binding superfamily protein	1.17601	1.2008	1.20461	0.298112	0.0918609	0.0756298	-2.97864	0.000168551	0.00339015	1.19381	0.155201	down
AT2G40230	HXXXD-type acyl-transferase family protein	53.1128	77.9843	68.7265	22.7638	18.1394	32.3165	-1.39237	4.09121e-07	1.86852e-05	66.6079	24.4065	down
AT2G40475		7.08607	9.11543	4.97638	2.49944	0.312237	0.822614	-2.56233	3.94451e-07	1.81124e-05	7.05929	1.21143	down
AT2G40610	expansin A8	2.52346	2.88681	2.11773	8.60018	8.08792	6.29048	1.63614	7.0691e-10	6.34131e-08	2.50933	7.65953	up
AT2G40670	response regulator 16	7.39983	13.0756	7.85227	21.8553	19.2529	21.9175	1.19036	2.50893e-05	0.000691827	9.44256	21.0086	up
AT2G40890	cytochrome P450, family 98, subfamily A, polypeptide 3	43.9554	55.1635	50.0032	15.3209	11.7622	16.9261	-1.71624	1.13378e-14	2.4596e-12	49.7074	14.6697	down
AT2G41178	other RNA	5.38826	5.64376	5.11496	10.1358	18.1885	9.07558	1.24196	0.000849255	0.0122824	5.38233	12.4666	up
AT2G41460	apurinic endonuclease-redox protein	2.43957	2.79601	2.97749	5.94647	6.18155	4.75472	1.06317	9.69621e-06	0.00030006	2.73769	5.62758	up
AT2G41640	Glycosyltransferase family 61 protein	31.9188	17.5602	23.4385	91.2451	123.645	51.4695	1.89106	1.69639e-11	2.22626e-09	24.3058	88.7864	up
AT2G41800	Protein of unknown function, DUF642	3.53399	1.63783	3.2712	0.892948	0.383252	0.121359	-2.63684	2.39355e-06	8.9906e-05	2.81434	0.465853	down
AT2G41810	Protein of unknown function, DUF642	1.17344	0.686455	1.84342	0.136336	0	0	-4.89445	1.04212e-06	4.31042e-05	1.23444	0.0454453	down
AT2G41900	CCCH-type zinc finger protein with ARM repeat domain	34.2342	36.0034	30.6951	20.9901	16.4794	8.61127	-1.1315	4.18979e-06	0.00014252	33.6442	15.3602	down
AT2G41940	zinc finger protein 8	38.3486	68.4228	46.1178	13.2181	6.89902	8.90152	-2.38258	1.54752e-17	5.22226e-15	50.9631	9.67287	down
AT2G42190		13.6341	12.0107	6.69058	16.9123	14.0407	30.8498	1.02152	0.00452209	0.042977	10.7785	20.6009	up
AT2G42320	nucleolar protein gar2-related	20.5699	25.9918	20.4721	10.1365	6.52124	9.55881	-1.31636	1.06383e-08	7.1573e-07	22.3446	8.73885	down
AT2G42620	RNI-like superfamily protein	7.20258	8.09341	7.49455	4.68095	2.85759	3.23997	-1.05933	3.66069e-06	0.000127794	7.59684	3.59284	down
AT2G43100	isopropylmalate isomerase 2	90.9278	90.8189	99.0341	191.718	174.202	209.934	1.08048	6.12403e-09	4.39854e-07	93.5936	191.951	up
AT2G43200	S-adenosyl-L-methionine-dependent methyltransferases superfamily protein	1.30179	0.812305	1.08651	3.1594	2.96207	1.41546	1.24354	0.000765393	0.0113872	1.06687	2.51231	up
AT2G43510	trypsin inhibitor protein 1	64.7234	54.9274	83.7562	31.9228	32.5311	31.3107	-1.0512	2.23207e-06	8.45877e-05	67.8023	31.9216	down
AT2G43590	Chitinase family protein	9.72581	11.8034	8.28681	31.9462	28.3281	31.7189	1.66682	7.73438e-15	1.75445e-12	9.93867	30.6644	up
AT2G44500	O-fucosyltransferase family protein	122.804	75.5412	117.958	262.466	340.069	136.583	1.23832	9.36934e-06	0.000292513	105.434	246.373	up
AT2G44730	Alcohol dehydrogenase transcription factor Myb/SANT-like family protein	31.6968	40.0836	32.1396	16.8161	12.0599	18.9693	-1.07135	1.01908e-05	0.000313995	34.64	15.9484	down
AT2G44735		6.93578	5.89142	6.28946	3.16743	2.17021	1.95692	-1.37179	6.9422e-07	3.01182e-05	6.37222	2.43152	down
AT2G44810	alpha/beta-Hydrolases superfamily protein	34.0943	30.8988	35.2798	8.87461	6.14465	8.91467	-2.02327	1.23328e-19	5.24391e-17	33.4243	7.97798	down
AT2G44830	Protein kinase superfamily protein	14.2985	11.8463	12.7608	7.68255	4.18509	5.18148	-1.16627	3.30613e-07	1.56196e-05	12.9685	5.68304	down
AT2G44840	ethylene-responsive element binding factor 13	64.9188	23.7808	43.5074	110.441	99.0342	72.3305	1.12419	0.000103472	0.00226086	44.069	93.9351	up
AT2G44940	Integrase-type DNA-binding superfamily protein	22.6636	31.5163	31.7594	5.91246	3.01102	5.7394	-2.51438	5.15924e-18	1.76912e-15	28.6465	4.88763	down
AT2G45050	GATA transcription factor 2	0.395538	0.518307	0.377108	0.0735288	0.0339861	0	-3.6723	0.00320801	0.0335146	0.430318	0.0358383	down
AT2G45080	cyclin p3;1	4.40092	9.17997	3.9779	2.22059	1.56659	1.02294	-1.87119	2.78346e-05	0.000760622	5.85293	1.60337	down
AT2G45300	RNA 3'-terminal phosphate cyclase/enolpyruvate transferase, alpha/beta	74.9338	68.6682	83.8177	16.4224	14.2373	15.4492	-2.26568	1.83503e-37	3.00098e-34	75.8066	15.3696	down
AT2G45970	cytochrome P450, family 86, subfamily A, polypeptide 8	3.6051	8.33563	1.94905	1.90767	1.34947	1.22465	-1.61556	0.00017172	0.00344088	4.62993	1.49393	down
AT2G46150	Late embryogenesis abundant (LEA) hydroxyproline-rich glycoprotein family	4.77143	3.40268	2.44195	2.06964	1.01519	1.28586	-1.25082	0.00206524	0.0245017	3.53868	1.4569	down
AT2G46370	Auxin-responsive GH3 family protein	359.008	391.49	397.343	136.437	100.408	117.62	-1.66358	2.7134e-21	1.34156e-18	382.613	118.155	down
AT2G46400	WRKY DNA-binding protein 46	55.7062	27.1551	40.0574	100.862	120.129	72.0762	1.28623	4.38191e-07	1.98211e-05	40.9729	97.6891	up
AT2G46520	cellular apoptosis susceptibility protein, putative / importin-alpha re-exporter, putative	159.289	151.214	179.431	90.7522	81.4906	64.1605	-1.03005	2.99897e-10	3.06529e-08	163.312	78.8011	down
AT2G46790	pseudo-response regulator 9	1.36337	0.957073	0.717445	0.248918	0.0627565	0.137781	-2.73354	7.26565e-06	0.000232282	1.01263	0.149819	down
AT2G46800	zinc transporter of Arabidopsis thaliana	61.9828	60.8771	62.6763	27.3987	22.3438	24.9688	-1.27609	3.61348e-14	6.92096e-12	61.8454	24.9038	down
AT2G46970	phytochrome interacting factor 3-like 1	2.03031	3.25774	3.59489	0.889646	0.523355	1.78508	-1.39506	0.00371073	0.0372299	2.96098	1.06603	down
AT2G47180	galactinol synthase 1	114.98	89.9483	92.7771	27.993	12.602	26.7586	-2.09703	5.08228e-14	9.39558e-12	99.2351	22.4512	down
AT2G47190	myb domain protein 2	6.4563	3.16713	5.12395	3.0728	1.26991	1.5958	-1.29752	0.000780815	0.0115469	4.9158	1.9795	down
AT2G47270	sequence-specific DNA binding transcription factors;transcription regulators	0.598117	0.209937	0.388806	2.84918	2.56962	1.58669	2.57477	6.99777e-05	0.00161359	0.398954	2.33517	up
AT3G01345	Expressed protein	0.027457	0	0	0.102083	0.778539	0.252506	5.41074	0.000539582	0.00873687	0.00915234	0.377709	up
AT3G01350	Major facilitator superfamily protein	3.68839	3.67266	3.17418	1.3859	1.14631	1.98005	-1.15687	0.000486134	0.00803047	3.51174	1.50409	down
AT3G01420	Peroxidase superfamily protein	0.078546	0.0918979	0.136157	1.56965	0.101235	0.208368	2.54206	0.00546256	0.0494819	0.1022	0.626417	up
AT3G01830	Calcium-binding EF-hand family protein	286.26	206.601	280.328	412.613	523.517	628.592	1.07934	6.84669e-06	0.000220881	257.73	521.574	up
AT3G01840	Protein kinase superfamily protein	12.3903	7.87103	9.5954	21.5155	22.4839	23.2576	1.22235	1.1391e-08	7.52086e-07	9.95225	22.419	up
AT3G02150	plastid transcription factor 1	49.9169	50.1065	61.4546	23.2127	25.4156	23.4612	-1.12687	2.80825e-09	2.24449e-07	53.826	24.0298	down
AT3G02250	O-fucosyltransferase family protein	20.9084	25.7652	22.2113	13.2504	11.3012	6.83122	-1.12842	3.41049e-07	1.59707e-05	22.9616	10.461	down
AT3G02840	ARM repeat superfamily protein	114.219	53.9725	101.219	163.012	231.426	157.975	1.07808	5.91291e-05	0.00140028	89.8034	184.138	up
AT3G02850	STELAR K+ outward rectifier	0.835751	0.415074	0.413928	1.41095	1.49484	1.42376	1.43694	0.000177619	0.00353575	0.554918	1.44318	up
AT3G02885	GAST1 protein homolog 5	3.87281	1.29461	3.6564	0.128561	0.23769	0	-4.63137	6.36479e-08	3.52384e-06	2.94127	0.122084	down
AT3G03190	glutathione S-transferase F11	11.8694	11.4211	13.5566	27.1169	19.7777	33.7434	1.18307	1.08107e-05	0.000329278	12.2824	26.8794	up
AT3G03280		0.57172	0.267562	0.0825882	0.929954	1.39186	1.28074	2.05673	0.00439344	0.0421005	0.30729	1.20085	up
AT3G03440	ARM repeat superfamily protein	5.5681	5.21168	5.76172	2.56131	1.80632	2.13026	-1.31576	3.3241e-07	1.56697e-05	5.51383	2.16596	down
AT3G03480	acetyl CoA:(Z)-3-hexen-1-ol acetyltransferase	1.35552	1.82039	3.11597	0.766913	0.886195	0.938072	-1.24421	0.00466115	0.0440623	2.09729	0.863726	down
AT3G03990	alpha/beta-Hydrolases superfamily protein	118.249	184.296	153.112	58.7654	41.169	79.83	-1.28755	6.298e-06	0.000205442	151.886	59.9215	down
AT3G04140	Ankyrin repeat family protein	2.75659	3.16158	1.447	1.19088	0.43368	0.727837	-1.62365	9.16348e-05	0.00202933	2.45505	0.784132	down
AT3G04181		6.33913	4.97978	5.10188	2.73561	2.23708	1.68165	-1.28338	0.0026483	0.029355	5.4736	2.21812	down
AT3G05640	Protein phosphatase 2C family protein	83.0684	91.2027	82.4666	40.6894	31.5497	35.7631	-1.21531	1.45756e-12	2.27851e-10	85.5792	36.0007	down
AT3G05650	receptor like protein 32	40.4219	40.4542	40.2445	20.655	16.8206	13.5781	-1.22714	7.60738e-14	1.34777e-11	40.3735	17.0179	down
AT3G05660	receptor like protein 33	25.8903	33.123	34.4289	8.36848	6.58628	7.96402	-1.99405	1.5853e-21	8.22034e-19	31.1474	7.63959	down
AT3G06030	NPK1-related protein kinase 3	2.38448	2.06584	1.2981	0.769303	0.507975	0.683093	-1.50488	4.85808e-05	0.00120486	1.91614	0.653457	down
AT3G06150		32.5077	43.3588	34.3296	19.4792	15.3825	18.2026	-1.01918	4.89811e-07	2.19692e-05	36.7321	17.6881	down
AT3G06520	agenet domain-containing protein	1.99031	1.06452	1.0679	4.90384	3.85462	1.922	1.38478	0.000440814	0.0074026	1.37424	3.56015	up
AT3G06870	proline-rich family protein	3.04263	4.3163	2.43112	1.45822	1.9199	0.874414	-1.18931	0.00484073	0.0454366	3.26335	1.41751	down
AT3G07195	RPM1-interacting protein 4 (RIN4) family protein	257.145	182.616	232.497	423.285	597.211	451.66	1.1748	1.6569e-08	1.05466e-06	224.086	490.719	up
AT3G07200	RING/U-box superfamily protein	4.31578	3.32139	3.03406	10.5634	7.99339	9.19308	1.42095	1.04417e-07	5.52214e-06	3.55708	9.24996	up
AT3G08570	Phototropic-responsive NPH3 family protein	2.55442	1.9887	2.33815	1.30918	0.676917	0.996404	-1.17444	0.000730423	0.0110368	2.29376	0.994168	down
AT3G08870	Concanavalin A-like lectin protein kinase family protein	4.11404	3.73908	3.63468	1.27464	1.40031	1.75745	-1.31333	2.82072e-06	0.000103216	3.82927	1.47747	down
AT3G09070	Protein of unknown function (DUF740)	9.34333	7.42931	7.01842	5.57458	2.07967	3.34888	-1.09198	0.000298599	0.00537074	7.93035	3.66771	down
AT3G09260	Glycosyl hydrolase superfamily protein	1.71553	2.61503	4.60941	0.706158	0.947602	1.45631	-1.46182	0.00129664	0.016985	2.97999	1.03669	down
AT3G09940	monodehydroascorbate reductase	92.9859	45.0528	104.067	19.0445	26.8525	18.7613	-1.86625	1.2197e-10	1.3114e-08	80.7021	21.5528	down
AT3G10100	transposable element gene	0.249563	0.302291	0.0763427	0.736825	0.567618	0.550404	1.60288	0.00322474	0.0336398	0.209399	0.618283	up
AT3G10150	purple acid phosphatase 16	1.13854	0.69934	0.431729	2.01729	1.62027	1.86254	1.33514	0.00375755	0.0375755	0.756536	1.83336	up
AT3G10525	LOSS OF GIANT CELLS FROM ORGANS	91.0939	120.27	117.831	29.9809	26.6383	50.4892	-1.55424	1.03158e-07	5.48284e-06	109.731	35.7028	down
AT3G10930		25.5617	17.0896	26.357	48.6884	51.4466	47.2556	1.13435	2.11082e-07	1.03163e-05	23.0027	49.1302	up
AT3G10960	AZA-guanine resistant1	3.64619	3.46968	3.00226	1.93929	1.81014	1.11773	-1.0406	0.00013478	0.00280427	3.37271	1.62239	down
AT3G11430	glycerol-3-phosphate acyltransferase 5	1.03252	0.128857	0.0198871	0.0213268	0	0	-5.76772	0.000631468	0.00990776	0.393755	0.00710893	down
AT3G11480	S-adenosyl-L-methionine-dependent methyltransferases superfamily protein	6.93127	4.80025	19.8007	2.0223	1.30863	2.24276	-2.46618	7.32511e-08	3.99312e-06	10.5107	1.8579	down
AT3G11580	AP2/B3-like transcriptional factor family protein	10.2048	13.5969	7.66551	3.86844	2.78523	2.23648	-1.80973	7.93283e-10	6.97058e-08	10.4891	2.96338	down
AT3G11660	NDR1/HIN1-like 1	154.573	167.466	168.738	58.018	42.5228	65.4448	-1.51671	5.60033e-12	7.93754e-10	163.593	55.3285	down
AT3G11670	UDP-Glycosyltransferase superfamily protein	16.5875	17.4529	14.4911	8.19113	6.27	4.92908	-1.30736	1.82049e-11	2.37445e-09	16.1772	6.4634	down
AT3G12320		5.48716	5.88421	5.07087	2.06035	1.90464	2.41643	-1.3138	5.50024e-06	0.000182997	5.48075	2.12714	down
AT3G12920	SBP (S-ribonuclease binding protein) family protein	37.3613	51.3736	42.7137	12.7111	9.50099	16.9736	-1.69081	3.3798e-10	3.35772e-08	43.8162	13.0619	down
AT3G13682	LSD1-like2	2.07379	1.99651	2.20827	1.06474	1.15398	0.642702	-1.1211	0.000462753	0.00768819	2.09286	0.953808	down
AT3G13810	indeterminate(ID)-domain 11	5.32475	4.03835	3.59361	2.32791	1.33821	1.19109	-1.40152	1.87211e-06	7.32985e-05	4.3189	1.61907	down
AT3G14680	cytochrome P450, family 72, subfamily A, polypeptide 14	0.260664	0.146387	0.0903704	1.23564	1.29904	0.460994	2.6117	5.37755e-05	0.00129917	0.165807	0.998556	up
AT3G14720	MAP kinase 19	47.1138	50.1674	54.2113	24.0052	15.8235	19.8952	-1.31328	2.79415e-11	3.515e-09	50.4975	19.9079	down
AT3G14810	mechanosensitive channel of small conductance-like 5	19.0241	20.3252	18.2506	7.49078	7.65036	4.86066	-1.5077	3.14704e-15	7.77978e-13	19.2	6.66727	down
AT3G15270	squamosa promoter binding protein-like 5	24.6715	18.7971	15.7811	11.8327	6.402	9.2152	-1.07201	5.77073e-05	0.00136926	19.7499	9.14998	down
AT3G15310	transposable element gene	5.21726	5.07112	3.35421	1.0125	0.344836	0.709764	-2.69059	2.64617e-12	3.90677e-10	4.54753	0.689033	down
AT3G15356	Legume lectin family protein	69.665	74.7093	47.414	125.46	211.161	97.7141	1.2087	8.84284e-06	0.00027893	63.9294	144.778	up
AT3G15450	Aluminium induced protein with YGL and LRDR motifs	47.4192	44.2656	23.1779	8.41576	6.04289	15.283	-1.8615	2.90357e-07	1.3779e-05	38.2876	9.91388	down
AT3G15470	Transducin/WD40 repeat-like superfamily protein	13.6197	12.8831	13.9106	6.9705	6.52273	5.50958	-1.06069	1.2104e-10	1.3114e-08	13.4711	6.33427	down
AT3G15500	NAC domain containing protein 3	4.23847	1.43078	2.64982	4.52081	11.6121	6.93064	1.53563	0.000232416	0.00438824	2.77302	7.68785	up
AT3G15760		2.88771	2.55544	3.18547	6.24655	6.22562	7.83697	1.28634	4.02161e-05	0.00103385	2.87621	6.76971	up
AT3G16400	nitrile specifier protein 1	229.305	142.241	237.168	72.2633	55.2779	60.4505	-1.66087	3.75119e-14	7.12056e-12	202.905	62.6639	down
AT3G16410	nitrile specifier protein 4	1.09286	0.727835	1.49369	0.351619	0.361163	0.431155	-1.48618	0.0015681	0.0196568	1.10479	0.381312	down
AT3G16420	PYK10-binding protein 1	22.0956	9.88539	27.1607	4.29477	6.41801	6.09503	-1.76037	3.85285e-07	1.77298e-05	19.7139	5.6026	down
AT3G16460	Mannose-binding lectin superfamily protein	23.0251	13.7408	28.8666	10.7431	11.5629	8.12478	-1.08446	4.21997e-05	0.00107574	21.8775	10.1436	down
AT3G16470	Mannose-binding lectin superfamily protein	681.303	505.349	817.792	156.965	144.554	227.863	-1.86048	1.72184e-12	2.61473e-10	668.148	176.461	down
AT3G16670	Pollen Ole e 1 allergen and extensin family protein	53.6791	118.928	70.6646	34.6409	16.6321	32.1691	-1.51208	5.15868e-06	0.000173534	81.0907	27.814	down
AT3G16712		2.25402	3.06871	4.44007	6.85657	12.1486	11.4516	1.68708	0.000859064	0.012357	3.25427	10.1523	up
AT3G16860	COBRA-like protein 8 precursor	125.115	91.0319	111.09	239.797	313.94	137.364	1.0961	1.03927e-05	0.00031883	109.079	230.367	up
AT3G17130	Plant invertase/pectin methylesterase inhibitor superfamily protein	8.57952	9.83154	6.3937	2.38489	1.86018	3.00629	-1.71308	4.07435e-06	0.000139262	8.26825	2.41712	down
AT3G18400	NAC domain containing protein 58	1.03041	0.0438387	0.0405949	0	0	0	-5.61235	0.00494783	0.0461566	0.371614	0	down
AT3G18710	plant U-box 29	8.79827	5.18195	6.53636	23.2539	34.302	15.5813	1.86155	5.00578e-11	5.81546e-09	6.83886	24.379	up
AT3G19030		185.875	163.853	275.933	518.209	568.154	739.453	1.598	1.3005e-09	1.10154e-07	208.553	608.605	up
AT3G19040	histone acetyltransferase of the TAFII250 family 2	0.140353	0.200917	0.178895	0.391365	0.638452	0.362109	1.44564	0.0011383	0.0153848	0.173388	0.463975	up
AT3G19470	F-box and associated interaction domains-containing protein	3.45931	3.03552	3.05184	2.32539	1.38003	0.873991	-1.06571	0.00277871	0.0303574	3.18222	1.52647	down
AT3G19580	zinc-finger protein 2	47.7833	26.6098	41.4513	88.9042	107.005	74.6122	1.25937	5.30255e-08	2.98233e-06	38.6148	90.1738	up
AT3G19680	Protein of unknown function (DUF1005)	67.6788	75.6901	63.2067	161.454	221.462	126.407	1.32811	2.73031e-10	2.81779e-08	68.8585	169.774	up
AT3G19690	CAP (Cysteine-rich secretory proteins, Antigen 5, and Pathogenesis-related 1 protein) superfamily protein	3.54363	4.16227	1.8067	6.8458	9.61209	11.0595	1.60308	3.59884e-05	0.0009411	3.17087	9.17247	up
AT3G20100	cytochrome P450, family 705, subfamily A, polypeptide 19	3.22251	2.74203	3.00465	9.39421	10.5092	10.483	1.80717	8.21481e-16	2.21072e-13	2.98973	10.1288	up
AT3G20600	Late embryogenesis abundant (LEA) hydroxyproline-rich glycoprotein family	82.61	79.3215	83.6133	148.767	191.902	159.927	1.06908	5.68831e-09	4.12743e-07	81.8483	166.865	up
AT3G20830	AGC (cAMP-dependent, cGMP-dependent and protein kinase C) kinase family protein	5.31947	5.64921	4.19679	2.78911	1.46496	1.06138	-1.51832	1.12671e-05	0.000341223	5.05516	1.77182	down
AT3G21460	Glutaredoxin family protein	6.54289	4.61107	6.73841	14.8102	9.92098	16.1727	1.24234	7.92787e-05	0.00180264	5.96412	13.6346	up
AT3G21520	DUF679 domain membrane protein 1	5.56572	1.7861	2.94034	5.17322	12.2517	7.38709	1.33576	0.0019882	0.0236802	3.43072	8.27067	up
AT3G21670	Major facilitator superfamily protein	34.0735	31.2581	32.5233	19.3002	14.3651	13.3379	-1.03485	8.8005e-10	7.66797e-08	32.6183	15.6677	down
AT3G21700	Ras-related small GTP-binding family protein	9.4943	8.88657	8.34872	3.88289	3.73778	3.6635	-1.20428	6.75432e-08	3.71051e-06	8.90986	3.76139	down
AT3G21870	cyclin p2;1	0.124678	0	0.0540313	1.91211	0.160692	0.440996	3.80804	0.00476052	0.0448222	0.0595698	0.837934	up
AT3G21890	B-box type zinc finger family protein	2.20947	2.06804	1.9768	0.463729	0.122481	0.504199	-2.45742	0.000233712	0.00440489	2.08477	0.36347	down
AT3G22275		20.6819	14.755	30.8883	69.1918	53.6015	51.5174	1.41442	1.25655e-07	6.54761e-06	22.1084	58.1036	up
AT3G22360	alternative oxidase 1B	0.633589	0.84719	0.353027	0.0420648	0.0777718	0	-3.97804	0.00101231	0.0140603	0.611268	0.0399456	down
AT3G22415		18.1909	18.9786	19.8841	14.3234	4.9778	7.62277	-1.07741	0.00201312	0.0239368	19.0179	8.97466	down
AT3G22460	O-acetylserine (thiol) lyase (OAS-TL) isoform A2	4.28453	3.29415	4.11142	8.00031	10.6498	6.71138	1.14829	1.6127e-05	0.000470961	3.8967	8.45384	up
AT3G22620	Bifunctional inhibitor/lipid-transfer protein/seed storage 2S albumin superfamily protein	7.2408	3.72275	6.40843	3.17551	1.00772	2.81364	-1.26592	0.00376069	0.0375892	5.79066	2.33229	down
AT3G23000	CBL-interacting protein kinase 7	33.4767	51.0355	42.4359	14.3653	10.2323	19.2964	-1.47804	2.12223e-07	1.03483e-05	42.316	14.6313	down
AT3G23010	receptor like protein 36	1.98034	1.48287	0.944037	3.17519	3.33936	3.53734	1.2493	0.000144454	0.00297011	1.46908	3.35063	up
AT3G23170		71.8539	58.4891	61.94	127.822	178.322	135.732	1.24401	3.52131e-10	3.48201e-08	64.0943	147.292	up
AT3G23230	Integrase-type DNA-binding superfamily protein	9.16829	3.4523	7.12441	11.8521	19.5585	11.1824	1.15204	0.00285359	0.0308852	6.58167	14.1977	up
AT3G23240	ethylene response factor 1	1.93439	0.603523	0.678624	2.22606	4.55099	3.06265	1.68859	0.000936634	0.0132223	1.07218	3.2799	up
AT3G23450		3.14173	4.35213	5.57679	11.2602	10.3229	6.98758	1.13393	3.10156e-05	0.000829424	4.35688	9.52354	up
AT3G23810	S-adenosyl-l-homocysteine (SAH) hydrolase 2	227.168	312.197	229.011	118.879	64.625	78.2515	-1.53635	3.48231e-11	4.26772e-09	256.125	87.2519	down
AT3G23820	UDP-D-glucuronate 4-epimerase 6	541.234	600.956	590.197	286.448	204.147	206.784	-1.29044	3.54686e-14	6.85512e-12	577.462	232.46	down
AT3G24450	Heavy metal transport/detoxification superfamily protein	0	0.054871	0	0.435914	0.201486	0.829424	4.73012	0.00400518	0.0392759	0.0182903	0.488941	up
AT3G24840	Sec14p-like phosphatidylinositol transfer family protein	4.21064	3.95945	4.80376	3.3312	1.39669	1.30231	-1.115	0.000758003	0.0113009	4.32462	2.01007	down
AT3G25150	Nuclear transport factor 2 (NTF2) family protein with RNA binding (RRM-RBD-RNP motifs) domain	28.7052	27.9827	27.309	6.29574	4.19439	4.79162	-2.43021	8.7208e-37	1.23603e-33	27.999	5.09391	down
AT3G25250	AGC (cAMP-dependent, cGMP-dependent and protein kinase C) kinase family protein	17.8632	6.11497	10.0497	21.3082	31.3043	15.1974	1.03362	0.00234227	0.0269608	11.3426	22.6033	up
AT3G25590		2.92132	3.50819	2.26925	1.33204	1.16033	1.38422	-1.11943	0.000678835	0.0104278	2.89958	1.2922	down
AT3G25700	Eukaryotic aspartyl protease family protein	5.90988	6.26755	4.44078	3.74852	2.00504	1.39956	-1.22143	0.000158963	0.00322477	5.53941	2.38437	down
AT3G25760	allene oxide cyclase 1	1292.16	1266.09	1532.95	569.568	589.034	682.38	-1.10517	2.48912e-08	1.51629e-06	1363.73	613.661	down
AT3G25870		34.0185	43.225	47.3979	15.6823	13.4364	24.7445	-1.14886	8.23217e-05	0.00185792	41.5472	17.9544	down
AT3G26330	cytochrome P450, family 71, subfamily B, polypeptide 37	1.2849	0.230295	1.30323	0.0762311	0.0469801	0.0193396	-4.32924	2.73252e-06	0.000100334	0.939473	0.0475169	down
AT3G27170	chloride channel B	8.16006	11.3888	12.4433	1.75029	1.53505	1.65093	-2.66588	3.72546e-27	3.44362e-24	10.6641	1.64542	down
AT3G27400	Pectin lyase-like superfamily protein	5.92805	4.82986	6.89508	2.42668	1.45154	1.56445	-1.68064	1.09806e-08	7.3643e-07	5.88433	1.81423	down
AT3G27415		1.62337	1.25132	5.09013	1.0651	0.328202	0.878187	-1.79293	0.00458567	0.0433873	2.65494	0.757162	down
AT3G27520		4.51911	5.2251	4.30087	1.85313	1.37047	2.60139	-1.20528	0.000933433	0.0131947	4.68169	1.94166	down
AT3G28290	Protein of unknown function (DUF677)	3.28794	4.1033	3.48305	1.14929	1.95585	1.78919	-1.09634	0.00100084	0.0139436	3.62476	1.63144	down
AT3G28580	P-loop containing nucleoside triphosphate hydrolases superfamily protein	2.92997	1.72312	1.8653	5.08519	6.90652	5.4294	1.47025	3.61613e-07	1.67492e-05	2.17279	5.80703	up
AT3G28600	P-loop containing nucleoside triphosphate hydrolases superfamily protein	7.63703	3.74682	6.42241	4.16935	2.85411	1.58663	-1.04724	0.0026095	0.0290309	5.93542	2.87003	down
AT3G28899		0.234184	0	0.405949	8.27141	10.6646	14.7442	5.75933	5.60269e-09	4.07922e-07	0.213378	11.2267	up
AT3G28915	transposable element gene	0.0609891	0.0978604	0.00755162	0.299637	0.34437	0.191069	2.36212	0.000900236	0.0128536	0.0554671	0.278359	up
AT3G29000	Calcium-binding EF-hand family protein	32.43	14.2	24.0065	73.9345	92.2059	66.2153	1.76083	8.61581e-11	9.54022e-09	23.5455	77.4519	up
AT3G29200	chorismate mutase 1	37.4116	41.6695	47.4347	17.2065	17.3774	15.084	-1.32016	1.5079e-12	2.34e-10	42.1719	16.556	down
AT3G29633		8.29888	2.58922	3.99606	0.428535	0.792301	0	-3.63253	0.00492023	0.0459798	4.96139	0.406945	down
AT3G29781	transposable element gene	0	0	0	0.397269	0.510065	0.184774	6.48719	1.15125e-05	0.00034692	0	0.364036	up
AT3G29782	transposable element gene	0	0	0	0.0298761	0.128886	0.0454767	5.25168	0.00396368	0.0390672	0	0.0680795	up
AT3G30122		0.149529	0.0874738	0.178203	3.40512	2.44114	2.85605	4.41582	2.74982e-25	2.33845e-22	0.138402	2.90077	up
AT3G30180	brassinosteroid-6-oxidase 2	2.80351	3.57615	1.69878	1.22219	0.490303	0.702035	-1.72567	3.20972e-05	0.000855122	2.69281	0.804843	down
AT3G33528		0.347143	0	0.15044	4.83993	4.17589	5.52543	4.95296	1.17022e-14	2.51301e-12	0.165861	4.84708	up
AT3G41979	rRNA	157.881	69.467	67.3678	37.1258	22.2617	5.91849	-2.18899	2.11711e-06	8.12449e-05	98.2386	21.7687	down
AT3G42090	transposable element gene	0	0	0	13.3523	8.34001	11.8102	7.42652	2.9871e-08	1.76896e-06	0	11.1675	up
AT3G42100	transposable element gene	0	0	0	0.172099	0.209713	0.184566	7.07344	2.52652e-07	1.20705e-05	0	0.188793	up
AT3G42110	transposable element gene	0	0	0	0.82462	0.649369	0.348672	6.75152	2.21014e-06	8.39264e-05	0	0.607554	up
AT3G42658	transposable element gene	0	0	0	0.459658	0.382429	0.17492	5.3162	0.00237471	0.027187	0	0.339002	up
AT3G42810	transposable element gene	0	0	0	0.442359	1.30857	0.26934	5.38128	0.00259477	0.0288972	0	0.673424	up
AT3G43600	aldehyde oxidase 2	1.89778	1.66953	1.78868	4.7906	4.47312	2.23753	1.10844	3.08514e-05	0.00082607	1.78533	3.83375	up
AT3G44260	Polynucleotidyl transferase, ribonuclease H-like superfamily protein	248.668	211.161	272.888	518.791	624.028	650.722	1.34119	5.61514e-11	6.48793e-09	244.239	597.847	up
AT3G44320	nitrilase 3	53.8468	49.6006	59.5314	29.2593	25.6617	21.9108	-1.06043	3.35627e-10	3.35772e-08	54.3262	25.6106	down
AT3G44350	NAC domain containing protein 61	30.9093	18.2601	25.2578	32.7528	64.9556	47.3974	1.0206	0.00044021	0.00739832	24.8091	48.3686	up
AT3G44450		30.0639	33.54	44.6791	10.2319	9.00206	17.5082	-1.49304	3.75109e-06	0.000129883	36.0943	12.2474	down
AT3G44540	fatty acid reductase 4	1.02633	0.216144	0.0444779	0	0	0	-6.6988	4.96292e-05	0.00122262	0.428986	0	down
AT3G44550	fatty acid reductase 5	3.52284	0.520634	3.03041	0.393914	0.705532	0.187377	-2.44182	0.000105173	0.00228394	2.35796	0.428941	down
AT3G44560	fatty acid reductase 8	0.808942	0.459705	0.626015	0.16112	0.12412	0	-2.78771	0.00120365	0.0160135	0.631554	0.0950802	down
AT3G44750	histone deacetylase 3	23.3238	24.5743	25.6958	49.196	39.7215	54.9789	1.01331	2.26786e-06	8.54872e-05	24.5313	47.9655	up
AT3G44990	xyloglucan endo-transglycosylase-related 8	6.15408	6.34594	6.78044	15.3828	22.3164	12.175	1.3954	2.69872e-08	1.62535e-06	6.42682	16.6247	up
AT3G45130	lanosterol synthase 1	3.71152	1.8019	3.65283	0.0644818	0.253338	0.171767	-4.15515	3.23877e-19	1.35012e-16	3.05542	0.163196	down
AT3G45210	Protein of unknown function, DUF584	14.7113	14.4225	20.2803	8.48721	4.90364	8.43327	-1.13991	0.000155972	0.00317832	16.4714	7.2747	down
AT3G45260	C2H2-like zinc finger protein	19.4418	20.461	20.5548	11.3924	8.31222	9.56763	-1.01513	8.45595e-08	4.57439e-06	20.1526	9.75743	down
AT3G45640	mitogen-activated protein kinase 3	308.571	195.712	248.358	544.632	717.321	375.053	1.14829	9.30734e-07	3.91056e-05	250.881	545.669	up
AT3G46080	C2H2-type zinc finger family protein	17.0784	9.12243	12.1674	32.9946	44.6377	36.3078	1.62222	1.65318e-09	1.35702e-07	12.7894	37.9801	up
AT3G46090	C2H2 and C2HC zinc fingers superfamily protein	40.9847	17.7454	32.8646	114.413	141.461	115.332	2.06627	2.35781e-14	4.77401e-12	30.5316	123.735	up
AT3G46130	myb domain protein 48	1.42346	2.08179	0.963875	4.96153	4.16615	3.39855	1.51152	5.25039e-05	0.00127862	1.48971	4.17541	up
AT3G46600	GRAS family transcription factor	19.2042	13.8971	13.0003	35.0954	35.1809	26.6341	1.10579	7.81737e-09	5.46702e-07	15.3672	32.3035	up
AT3G46700	UDP-Glycosyltransferase superfamily protein	5.116	4.37808	10.9968	2.49988	3.06454	3.14348	-1.19602	0.00124236	0.0164156	6.8303	2.90264	down
AT3G46710	NB-ARC domain-containing disease resistance protein	0	0	0	0.0970269	0.269083	0.172308	5.96544	0.000180597	0.00357828	0	0.179473	up
AT3G46880		0.191605	0.53802	0.830351	4.98659	2.30487	1.76208	2.49547	0.000429977	0.00726077	0.519992	3.01785	up
AT3G46900	copper transporter 2	1.67021	0.84679	1.74922	3.3636	4.66411	3.49538	1.47361	0.0010766	0.0147763	1.42208	3.84103	up
AT3G47340	glutamine-dependent asparagine synthase 1	7.19701	3.55093	4.35202	0.725989	0.511334	0.197337	-3.40386	2.14418e-18	7.9974e-16	5.03332	0.47822	down
AT3G47420	phosphate starvation-induced gene 3	15.8952	17.3026	19.2001	4.95877	5.05563	5.52908	-1.7105	4.04435e-16	1.11666e-13	17.466	5.18116	down
AT3G47430	peroxin 11B	8.45429	8.97104	5.76021	18.8258	17.3643	11.6736	1.06712	1.63016e-05	0.00047346	7.72851	15.9545	up
AT3G47500	cycling DOF factor 3	21.1895	18.8197	14.9919	8.19433	6.13537	7.73195	-1.27316	3.80746e-09	2.91175e-07	18.3337	7.35388	down
AT3G47580	Leucine-rich repeat protein kinase family protein	0.625828	0.660548	0.704	1.86885	1.56744	1.2999	1.26957	1.66533e-05	0.000481699	0.663459	1.57873	up
AT3G48350	Cysteine proteinases superfamily protein	4.98902	5.58468	5.87266	0.720644	1.62201	1.1208	-2.19822	3.78116e-10	3.70449e-08	5.48212	1.15448	down
AT3G48360	BTB and TAZ domain protein 2	23.5913	18.6266	23.9664	42.7975	42.6818	67.7565	1.27789	1.15441e-06	4.71974e-05	22.0614	51.0786	up
AT3G48460	GDSL-like Lipase/Acylhydrolase superfamily protein	27.739	29.4737	33.7939	17.2723	11.4672	13.3847	-1.08631	1.82658e-07	9.13719e-06	30.3355	14.0414	down
AT3G48640		16.7863	7.85589	10.9688	16.2729	28.9595	23.8889	1.02216	0.00146497	0.0187284	11.8703	23.0404	up
AT3G48650		40.7186	18.2482	27.9139	50.6012	78.4905	49.7561	1.08863	0.000107806	0.00232922	28.9602	59.6159	up
AT3G48720	HXXXD-type acyl-transferase family protein	13.8232	14.5805	11.1976	7.63488	8.13143	2.99003	-1.07722	0.00035949	0.00622881	13.2004	6.25211	down
AT3G49220	Plant invertase/pectin methylesterase inhibitor superfamily	309.48	361.185	373.644	208.062	153.548	121.049	-1.10361	9.80927e-09	6.68414e-07	348.103	160.886	down
AT3G49340	Cysteine proteinases superfamily protein	3.58054	1.93813	4.82332	0.561356	0.630134	0.122069	-3.00275	5.88056e-08	3.26425e-06	3.44733	0.437853	down
AT3G49668	other RNA	14.8342	26.7129	13.9753	5.5452	6.37304	3.8782	-1.7962	5.58299e-08	3.13178e-06	18.5075	5.26548	down
AT3G49670	Leucine-rich receptor-like protein kinase family protein	11.3601	19.7057	10.124	7.06711	5.03474	4.68028	-1.27852	2.09594e-06	8.05782e-05	13.7299	5.59404	down
AT3G49940	LOB domain-containing protein 38	65.39	84.2507	87.4319	30.7259	27.3058	50.2057	-1.06773	0.000184554	0.0036431	79.0242	36.0791	down
AT3G50060	myb domain protein 77	32.1153	20.5134	25.9459	74.3187	73.5523	51.744	1.37313	1.47234e-11	1.95637e-09	26.1915	66.5383	up
AT3G50400	GDSL-like Lipase/Acylhydrolase superfamily protein	1.06363	0.0963432	0.416334	0	0	0	-6.58866	3.58097e-05	0.000938892	0.525435	0	down
AT3G50410	OBF binding protein 1	5.46159	5.0302	7.68759	3.49258	1.80203	3.27635	-1.04856	0.00270216	0.0297818	6.05979	2.85699	down
AT3G50700	indeterminate(ID)-domain 2	8.72467	11.8071	8.1334	5.49478	4.21092	4.15093	-1.0235	8.96516e-06	0.000281952	9.55505	4.61888	down
AT3G50750	BES1/BZR1 homolog 1	30.6888	33.1168	31.076	10.5751	7.74533	10.819	-1.65996	9.73883e-15	2.15675e-12	31.6272	9.71316	down
AT3G50760	galacturonosyltransferase-like 2	157.327	126.072	166.353	69.4695	64.1619	60.6764	-1.17702	7.45315e-12	1.03565e-09	149.917	64.7693	down
AT3G51110	Tetratricopeptide repeat (TPR)-like superfamily protein	9.97508	11.0884	11.9073	4.47851	4.8757	5.6903	-1.08271	2.6536e-06	9.76049e-05	10.9902	5.01484	down
AT3G51660	Tautomerase/MIF superfamily protein	122.764	143.403	169.906	40.7742	51.2511	58.175	-1.48655	6.95619e-10	6.29174e-08	145.358	50.0668	down
AT3G52170	DNA binding	2.57851	2.79122	1.86564	4.96007	4.73935	4.4571	1.0075	6.23119e-05	0.0014622	2.41179	4.71884	up
AT3G52470	Late embryogenesis abundant (LEA) hydroxyproline-rich glycoprotein family	378.634	478.894	455.363	194.119	180.86	254.359	-1.00952	9.07936e-06	0.000284701	437.631	209.779	down
AT3G52480		2.53196	2.23317	3.03859	1.31248	1.0041	0.585569	-1.43076	0.00118623	0.0158412	2.60124	0.967384	down
AT3G52920	Family of unknown function (DUF662)	10.0385	9.82303	12.3679	24.6759	18.6766	21.7737	1.04633	1.37922e-06	5.52453e-05	10.7432	21.7088	up
AT3G53232	ROTUNDIFOLIA like 1	6.35131	8.91715	4.90279	3.13619	2.89918	2.24651	-1.26051	0.00158317	0.0197908	6.72375	2.76063	down
AT3G53260	phenylalanine ammonia-lyase 2	320.697	227.309	315.742	51.9303	50.4507	37.2995	-2.60276	4.52392e-44	1.06865e-40	287.916	46.5602	down
AT3G53510	ABC-2 type transporter family protein	3.16863	2.65361	2.87644	1.84461	1.69088	0.637069	-1.06522	0.00176391	0.0215894	2.89956	1.39085	down
AT3G53600	C2H2-type zinc finger family protein	11.2328	5.96306	9.00931	16.4402	19.5914	17.8495	1.09026	0.000139005	0.00288035	8.73506	17.9604	up
AT3G54000		17.0626	12.9447	13.3983	50.7408	52.5659	37.3803	1.72637	2.14315e-21	1.08484e-18	14.4685	46.8957	up
AT3G54600	Class I glutamine amidotransferase-like superfamily protein	36.87	41.4276	39.3496	84.2673	76.1086	95.9764	1.16968	3.01533e-09	2.39201e-07	39.2157	85.4508	up
AT3G54810	Plant-specific GATA-type zinc finger transcription factor family protein	203.558	162.276	198.848	389.409	552.302	280.821	1.13879	5.46657e-07	2.43647e-05	188.227	407.511	up
AT3G54950	patatin-like protein 6	36.0222	34.4246	38.8358	12.5215	9.24576	17.8706	-1.40073	1.93161e-07	9.52809e-06	36.4276	13.2126	down
AT3G55110	ABC-2 type transporter family protein	2.63852	3.15654	2.57465	0.812068	0.030028	0.173056	-3.09024	0.0031511	0.0330798	2.7899	0.338384	down
AT3G55130	white-brown complex homolog 19	18.599	15.4797	14.8075	10.1007	4.79731	4.14902	-1.35982	6.16562e-07	2.71953e-05	16.2954	6.349	down
AT3G55290	NAD(P)-binding Rossmann-fold superfamily protein	13.8693	12.6766	13.1908	4.7585	4.51886	4.57644	-1.48016	3.37015e-11	4.16567e-09	13.2455	4.61793	down
AT3G55720	Protein of unknown function (DUF620)	2.36215	0.552736	1.27959	0.411668	0.126853	0.167102	-2.55989	9.05395e-05	0.00201136	1.39816	0.235208	down
AT3G55970	jasmonate-regulated gene 21	60.0886	30.1672	49.9234	17.0252	7.34835	6.45629	-2.18606	1.05604e-11	1.4392e-09	46.7264	10.2766	down
AT3G55980	salt-inducible zinc finger 1	326.518	170.809	266.469	747.77	896.762	496.769	1.5142	1.35695e-09	1.14026e-07	254.599	713.767	up
AT3G56080	S-adenosyl-L-methionine-dependent methyltransferases superfamily protein	1.77212	1.71792	1.86508	4.74534	5.18432	2.49232	1.22211	4.00586e-05	0.00103105	1.78504	4.14066	up
AT3G56260		10.2785	11.1521	9.99963	3.23656	1.80239	4.09562	-1.7226	1.38195e-07	7.09666e-06	10.4767	3.04486	down
AT3G56790	RNA splicing factor-related	6.05823	2.80186	2.84165	10.3345	10.8396	8.72264	1.40299	4.37658e-05	0.0011082	3.90058	9.96559	up
AT3G57260	beta-1,3-glucanase 2	459.51	233.109	390.748	107.707	80.0801	75.582	-2.01073	2.03301e-17	6.54875e-15	361.122	87.7896	down
AT3G57270	beta-1,3-glucanase 1	2.85673	1.38902	2.47602	0.724164	0.828827	0.68238	-1.54601	0.000441438	0.00740724	2.24059	0.745124	down
AT3G57980	DNA-binding bromodomain-containing protein	9.50941	7.02458	6.46441	5.24262	3.30438	1.50041	-1.20395	0.00038051	0.00654502	7.66613	3.34914	down
AT3G58620	tetratricopetide-repeat thioredoxin-like 4	84.2418	122.659	121.052	18.4733	25.2598	22.8558	-2.2593	8.09252e-22	4.41146e-19	109.317	22.1963	down
AT3G58795	other RNA	114.025	119.126	118.628	81.013	75.7417	19.925	-1.01001	0.00352293	0.0358533	117.26	58.8932	down
AT3G58980	F-box family protein	1.76051	2.43692	1.74081	4.54031	3.40889	4.71854	1.13584	0.0001337	0.00278673	1.97941	4.22258	up
AT3G58990	isopropylmalate isomerase 1	23.8354	21.8442	21.8597	65.407	51.2159	65.8631	1.4778	1.32891e-14	2.82526e-12	22.5131	60.8287	up
AT3G59010	pectin methylesterase 61	6.35266	6.96225	5.66624	2.51217	2.85824	1.42173	-1.47033	6.4889e-08	3.58322e-06	6.32705	2.26404	down
AT3G59710	NAD(P)-binding Rossmann-fold superfamily protein	2.97052	3.85777	2.54246	1.17344	0.350952	0.210139	-2.47786	2.21067e-06	8.39264e-05	3.12358	0.578177	down
AT3G59750	Concanavalin A-like lectin protein kinase family protein	1.3177	1.03514	0.611838	2.64639	1.37484	2.66333	1.23216	0.0026399	0.0293077	0.988226	2.22819	up
AT3G59940	Galactose oxidase/kelch repeat superfamily protein	71.2195	99.8297	79.0909	24.8439	18.225	47.4134	-1.39019	3.45573e-05	0.000910394	83.38	30.1608	down
AT3G60080	RING/U-box superfamily protein	26.7706	26.811	34.3146	13.4367	11.5267	13.8878	-1.13855	9.41092e-08	5.05243e-06	29.2987	12.9504	down
AT3G60530	GATA transcription factor 4	11.5094	14.288	11.0956	7.05676	4.40681	6.05646	-1.0406	4.78695e-05	0.0011903	12.2977	5.84001	down
AT3G60690	SAUR-like auxin-responsive protein family	63.6414	58.0686	85.7018	21.984	25.6442	39.6955	-1.18101	5.05654e-05	0.00124136	69.1373	29.1079	down
AT3G61190	BON association protein 1	48.2333	25.3148	40.0316	90.4843	103.92	95.5503	1.40076	3.15272e-09	2.48248e-07	37.8599	96.6515	up
AT3G61460	brassinosteroid-responsive RING-H2	97.3278	127.173	111.32	22.8552	12.3329	26.9418	-2.38348	1.16185e-16	3.33797e-14	111.94	20.71	down
AT3G61750	Cytochrome b561/ferric reductase transmembrane with DOMON related domain	1.95975	2.45727	1.1858	1.16854	0.349486	0.235419	-1.7108	0.0034653	0.0354801	1.86761	0.584481	down
AT3G61820	Eukaryotic aspartyl protease family protein	47.4827	59.7718	39.4331	31.3218	19.2546	18.6802	-1.06771	2.55243e-06	9.47028e-05	48.8959	23.0855	down
AT3G61890	homeobox 12	20.6041	15.84	23.2274	9.42952	6.09413	10.1299	-1.17048	1.8843e-05	0.000535564	19.8905	8.5512	down
AT3G61898		4.78886	5.84061	4.15067	1.34883	0.87283	1.2319	-2.0565	0.000246195	0.00460344	4.92671	1.15119	down
AT3G61970	AP2/B3-like transcriptional factor family protein	2.07123	4.20539	2.89995	1.45128	0.98567	0.901677	-1.45125	0.000187188	0.00367463	3.05886	1.11288	down
AT3G62550	Adenine nucleotide alpha hydrolases-like superfamily protein	37.1612	37.0668	36.3432	64.4414	76.8234	76.2366	1.02349	1.33952e-07	6.929e-06	36.8571	72.5004	up
AT3G62630	Protein of unknown function (DUF1645)	11.4241	11.4362	9.42509	3.52056	2.59835	3.15484	-1.76022	3.38131e-14	6.59511e-12	10.7618	3.09125	down
AT3G62660	galacturonosyltransferase-like 7	22.2095	25.8684	23.7975	12.3187	11.7375	9.63161	-1.06797	1.10902e-09	9.50716e-08	23.9585	11.2293	down
AT3G62930	Thioredoxin superfamily protein	4.18928	3.06871	3.63099	9.14209	8.37295	8.56858	1.30171	5.32405e-05	0.0012912	3.62966	8.69454	up
AT3G62980	F-box/RNI-like superfamily protein	28.348	34.7588	27.5513	15.581	8.97986	9.23814	-1.41047	2.16665e-10	2.28034e-08	30.2194	11.2663	down
AT3G63010	alpha/beta-Hydrolases superfamily protein	39.1363	39.0182	49.1458	13.0485	11.6119	14.2981	-1.66559	2.05927e-15	5.15061e-13	42.4334	12.9862	down
AT4G00130	DNA-binding storekeeper protein-related transcriptional regulator	0	0	0	3.6481	6.48541	2.00765	8.62246	2.62581e-11	3.3229e-09	0	4.04705	up
AT4G01090	Protein of unknown function (DUF3133)	39.3377	29.722	31.8426	73.6104	91.9824	35.1827	1.00464	0.000193176	0.00374598	33.6341	66.9252	up
AT4G01360		72.4905	51.8293	64.9058	131.432	209.991	167.714	1.47941	1.36942e-10	1.45569e-08	63.0752	169.712	up
AT4G01410	Late embryogenesis abundant (LEA) hydroxyproline-rich glycoprotein family	5.85739	8.24429	5.42033	3.80693	2.83809	2.86626	-1.01222	0.000616493	0.00969426	6.50734	3.17043	down
AT4G01720	WRKY family transcription factor	7.99252	9.13079	12.0549	4.80296	4.12878	3.12595	-1.26363	3.46073e-07	1.61703e-05	9.72607	4.01923	down
AT4G01950	glycerol-3-phosphate acyltransferase 3	144.913	124.736	137.856	258.584	387.024	192.147	1.06508	3.56266e-06	0.000125401	135.835	279.252	up
AT4G01975	transposable element gene	0.0922098	0.463902	0.169833	0.0214268	0.039615	0	-3.62816	0.000492087	0.0081225	0.241982	0.0203473	down
AT4G02170		0.895663	1.32736	0.711609	4.37063	5.25885	1.42562	1.90834	0.000784829	0.0115893	0.978211	3.68503	up
AT4G03010	RNI-like superfamily protein	2.71972	3.83589	2.45415	1.03887	1.18445	0.448049	-1.75558	3.88493e-05	0.00100601	3.00325	0.890457	down
AT4G03400	Auxin-responsive GH3 family protein	185.2	220.57	232.231	59.7534	64.101	64.1939	-1.72368	6.46323e-20	2.86267e-17	212.667	62.6828	down
AT4G03420	Protein of unknown function (DUF789)	69.945	61.292	82.2079	24.6696	22.3071	30.4905	-1.41131	3.18846e-10	3.22793e-08	71.1483	25.8224	down
AT4G03510	RING membrane-anchor 1	6.83437	7.23459	6.18215	1.73935	1.25836	2.14878	-1.9184	4.77787e-11	5.61202e-09	6.75037	1.7155	down
AT4G08040	1-aminocyclopropane-1-carboxylate synthase 11	2.17623	3.65449	2.77384	7.46637	5.91218	6.54288	1.23895	1.21302e-05	0.000363735	2.86819	6.64048	up
AT4G08555		11.0935	6.46312	8.63395	11.1529	22.079	19.8595	1.08838	0.00238617	0.0272695	8.73018	17.6971	up
AT4G08870	Arginase/deacetylase superfamily protein	898.623	736.63	836.47	340.297	218.32	239.537	-1.60532	2.64494e-18	9.53074e-16	823.908	266.051	down
AT4G08910		0.91872	0.859913	0.374722	0	0	0	-6.40144	2.58208e-05	0.000708323	0.717785	0	down
AT4G08950	Phosphate-responsive 1 family protein	351.779	285.169	332.702	847.143	1101.49	517.392	1.36493	3.87712e-09	2.94384e-07	323.216	822.008	up
AT4G09820	basic helix-loop-helix (bHLH) DNA-binding superfamily protein	0.700251	0.632827	0.104643	0	0	0	-6.9734	3.35002e-06	0.000119099	0.47924	0	down
AT4G09875	transposable element gene	0	0	0	0.322595	0.14126	0.0258446	5.6508	0.00132965	0.0173532	0	0.163233	up
AT4G10120	Sucrose-phosphate synthase family protein	8.40813	5.2904	7.6636	18.0496	17.738	8.15036	1.0484	0.000117653	0.00251135	7.12071	14.646	up
AT4G10160	RING/U-box superfamily protein	0	0	0	0.348147	0.214558	0.574104	5.22123	0.00375284	0.0375461	0	0.378936	up
AT4G10290	RmlC-like cupins superfamily protein	6.71876	6.28869	15.489	1.22324	0.119031	1.02899	-3.55837	4.2285e-10	4.08627e-08	9.49881	0.79042	down
AT4G11000	Ankyrin repeat family protein	21.206	16.1842	17.4374	37.6353	47.904	27.2847	1.06881	1.07547e-06	4.43969e-05	18.2759	37.608	up
AT4G11280	1-aminocyclopropane-1-carboxylic acid (acc) synthase 6	85.8198	50.9042	59.5019	215.6	230.417	140.675	1.60816	4.59349e-13	7.51212e-11	65.4086	195.564	up
AT4G11310	Papain family cysteine protease	1.29107	0.929564	3.07012	0.15385	0	0.117093	-4.26124	3.30504e-08	1.91458e-06	1.76359	0.0903143	down
AT4G11320	Papain family cysteine protease	177.909	125.499	177.351	16.1968	7.76565	9.5246	-3.82779	3.29073e-53	1.39922e-49	160.253	11.1624	down
AT4G11521	Receptor-like protein kinase-related family protein	18.458	13.2453	16.4314	34.67	36.0149	29.8418	1.0981	6.53519e-09	4.67805e-07	16.0449	33.5089	up
AT4G11911		47.6529	31.2975	54.1365	9.15877	5.59815	3.58055	-2.86509	6.94653e-22	3.8864e-19	44.3623	6.11249	down
AT4G12300	cytochrome P450, family 706, subfamily A, polypeptide 4	6.87409	7.90034	5.77561	3.23812	2.31035	1.88559	-1.45275	7.63363e-09	5.39173e-07	6.85001	2.47802	down
AT4G12310	cytochrome P450, family 706, subfamily A, polypeptide 5	2.58187	2.43962	2.81323	8.36501	9.97242	4.7488	1.5703	2.0612e-08	1.27758e-06	2.61158	7.69541	up
AT4G12470	azelaic acid induced 1	9.14019	6.63671	8.83435	15.2406	28.5109	8.38611	1.09793	0.00247459	0.027969	8.20375	17.3792	up
AT4G12490	Bifunctional inhibitor/lipid-transfer protein/seed storage 2S albumin superfamily protein	9.40399	6.21941	6.88177	1.72723	1.5967	0.995889	-2.36261	4.26078e-12	6.16218e-10	7.50172	1.43994	down
AT4G12500	Bifunctional inhibitor/lipid-transfer protein/seed storage 2S albumin superfamily protein	4.43745	2.34295	3.79677	1.4806	1.27094	0.764658	-1.57647	0.000321943	0.00571806	3.52572	1.17206	down
AT4G12830	alpha/beta-Hydrolases superfamily protein	11.2286	15.2643	11.7404	29.4878	29.7097	22.674	1.1222	2.83928e-08	1.69559e-06	12.7444	27.2905	up
AT4G13395	ROTUNDIFOLIA like 12	23.6333	13.1947	18.1479	57.1327	54.3292	78.1669	1.85224	3.15617e-11	3.94707e-09	18.3253	63.2096	up
AT4G13410	Nucleotide-diphospho-sugar transferases superfamily protein	19.2509	30.5958	17.8738	8.99765	5.65508	4.73347	-1.79905	4.36004e-11	5.20755e-09	22.5735	6.46207	down
AT4G13930	serine hydroxymethyltransferase 4	135.26	176.42	160.797	79.4564	54.1861	55.4039	-1.3031	2.54202e-11	3.23613e-09	157.492	63.0154	down
AT4G13950	ralf-like 31	25.7943	23.8003	32.7095	10.4211	8.05943	13.6855	-1.30009	5.82557e-06	0.000192316	27.4347	10.722	down
AT4G14040	selenium-binding protein 2	65.2565	82.1397	70.8863	172.905	147.319	117.42	1.02169	7.71385e-09	5.41242e-07	72.7608	145.881	up
AT4G14440	3-hydroxyacyl-CoA dehydratase 1	25.3545	38.923	28.3249	12.2725	8.89513	12.9091	-1.40113	5.73504e-08	3.20018e-06	30.8675	11.3589	down
AT4G14450		10.5166	3.25755	7.54129	12.7989	26.3288	13.006	1.33745	0.000993989	0.0138927	7.10516	17.3779	up
AT4G15200	formin 3	10.7082	13.9088	5.94321	1.16992	0.274413	0.505012	-3.97127	2.30312e-22	1.39898e-19	10.1868	0.649783	down
AT4G15210	beta-amylase 5	346.628	389.06	254.097	55.6592	24.8165	24.2245	-3.23976	6.05291e-32	7.14916e-29	329.928	34.9	down
AT4G15910	drought-induced 21	6.65574	5.41985	5.59569	3.77369	1.37253	2.44836	-1.19455	0.00227745	0.0264438	5.89043	2.53152	down
AT4G16070	Mono-/di-acylglycerol lipase, N-terminal;Lipase, class 3	9.4418	8.80357	9.03009	5.73295	4.02529	2.82782	-1.10961	1.53564e-06	6.06837e-05	9.09182	4.19535	down
AT4G16447		10.5697	12.1603	13.2327	2.66076	0.946031	5.50404	-1.88913	0.000126086	0.00266195	11.9876	3.03694	down
AT4G16590	cellulose synthase-like A01	123.289	145.377	98.8727	31.9925	16.8714	15.8442	-2.49945	3.29172e-24	2.41317e-21	122.513	21.5694	down
AT4G16730	terpene synthase 02	0.745291	0.495061	2.89644	0.0223462	0	0	-7.58434	2.97516e-08	1.76681e-06	1.37893	0.00744874	down
AT4G16740	terpene synthase 03	23.8403	23.822	39.5436	4.19226	3.08758	5.46974	-2.72311	1.15051e-19	4.99181e-17	29.0686	4.24986	down
AT4G16820	alpha/beta-Hydrolases superfamily protein	1.50953	0.959712	0.617153	2.32964	4.74769	2.13574	1.6258	0.000173357	0.00346714	1.0288	3.07102	up
AT4G17470	alpha/beta-Hydrolases superfamily protein	231.492	231.065	207.257	81.3623	43.1451	38.4409	-2.03513	1.91867e-18	7.28408e-16	223.271	54.3161	down
AT4G17490	ethylene responsive element binding factor 6	32.6444	20.9122	23.2598	70.8118	90.2312	66.3404	1.60869	5.89588e-14	1.07134e-11	25.6055	75.7945	up
AT4G17500	ethylene responsive element binding factor 1	38.8588	20.1022	28.7717	114.065	120.155	108.632	2.01249	1.26557e-18	4.892e-16	29.2442	114.284	up
AT4G17680	SBP (S-ribonuclease binding protein) family protein	2.34853	2.26583	2.06686	1.34333	0.496724	0.996832	-1.20507	0.00543642	0.0493292	2.22707	0.945628	down
AT4G17880	Basic helix-loop-helix (bHLH) DNA-binding family protein	12.5548	12.8144	12.8335	6.11256	3.49311	3.90503	-1.48207	3.21455e-11	3.99657e-09	12.7342	4.50357	down
AT4G18160	Ca2+ activated outward rectifying K+ channel 6	10.7924	9.96359	11.5521	6.76977	3.85118	3.98425	-1.13252	3.69845e-06	0.000128548	10.7694	4.8684	down
AT4G18170	WRKY DNA-binding protein 28	15.8227	8.33888	14.4862	4.3723	4.28684	4.03359	-1.56522	1.11621e-08	7.41679e-07	12.8826	4.23091	down
AT4G18197	purine permease 7	27.7611	18.4123	21.8672	44.0605	75.6858	30.2609	1.16725	4.68588e-05	0.00116933	22.6802	50.0024	up
AT4G18440	L-Aspartase-like family protein	1125.71	1293.32	986.948	589.912	375.056	338.453	-1.37251	1.31355e-11	1.75636e-09	1135.33	434.473	down
AT4G18630	Protein of unknown function (DUF688)	2.27757	1.51593	1.99598	0.893823	0.391394	0.716083	-1.49483	0.000277056	0.00505598	1.92982	0.6671	down
AT4G19120	S-adenosyl-L-methionine-dependent methyltransferases superfamily protein	177.061	209.93	205.997	92.9743	73.1817	55.979	-1.40465	3.84815e-14	7.23997e-12	197.663	74.045	down
AT4G19180	GDA1/CD39 nucleoside phosphatase family protein	9.58205	8.72793	9.2387	4.88652	4.47579	3.45749	-1.08022	5.1195e-09	3.77919e-07	9.18289	4.27327	down
AT4G19370	Protein of unknown function (DUF1218)	1.7787	1.31639	0.788756	2.07619	5.01149	3.07255	1.45146	0.00139833	0.0180064	1.29462	3.38674	up
AT4G19700	SBP (S-ribonuclease binding protein) family protein	61.1876	83.0899	92.7721	22.4149	15.2265	44.4973	-1.45258	5.60439e-05	0.00134014	79.0165	27.3796	down
AT4G21760	beta-glucosidase 47	1.99396	1.84177	1.97837	3.80424	5.0046	5.6608	1.37453	4.33794e-06	0.000147324	1.93803	4.82321	up
AT4G21830	methionine sulfoxide reductase B7	17.6609	7.96099	29.7225	5.69003	3.72391	1.57129	-2.35676	1.66357e-07	8.42082e-06	18.4481	3.66174	down
AT4G21850	methionine sulfoxide reductase B9	91.2815	53.0531	110.729	30.0986	29.2639	21.5131	-1.63429	3.11512e-10	3.16878e-08	85.0213	26.9586	down
AT4G21865		9.04433	8.99449	9.40683	4.5185	3.15706	4.11878	-1.18104	1.76144e-05	0.000506058	9.14855	3.93145	down
AT4G21890		5.54823	5.62259	7.88215	3.68355	2.47323	1.62308	-1.29887	8.47002e-05	0.00190377	6.35099	2.59329	down
AT4G22270	Protein of unknown function (DUF3537)	4.91485	5.43437	4.58755	2.81123	2.0419	1.6047	-1.19788	7.17645e-06	0.000229776	4.97892	2.15261	down
AT4G22290	Ubiquitin-specific protease family C19-related protein	12.4435	15.1194	11.4997	8.33324	5.51198	4.10065	-1.11756	5.89863e-06	0.000194125	13.0209	5.98196	down
AT4G22490	Bifunctional inhibitor/lipid-transfer protein/seed storage 2S albumin superfamily protein	0.701437	1.05046	2.31024	2.60789	4.94215	4.21777	1.56869	0.00352775	0.0358852	1.35405	3.9226	up
AT4G22620	SAUR-like auxin-responsive protein family	58.831	69.2175	81.2516	26.7449	27.4795	35.3299	-1.17515	1.87088e-06	7.32985e-05	69.7667	29.8514	down
AT4G22880	leucoanthocyanidin dioxygenase	2.81691	3.29575	0.457783	0.0327282	0.332804	0.149455	-3.59777	3.1401e-06	0.000112578	2.19015	0.171662	down
AT4G23030	MATE efflux family protein	4.72231	4.52985	6.45726	2.29007	2.1422	2.96715	-1.035	0.000705887	0.0107578	5.23648	2.46647	down
AT4G24340	Phosphorylase superfamily protein	4.81513	3.82186	6.81105	0.895113	0.926764	0.899264	-2.46931	1.19416e-11	1.61706e-09	5.14935	0.907047	down
AT4G24410		12.5839	13.9717	17.6015	2.3393	2.53536	2.14878	-2.62341	2.03447e-16	5.76705e-14	14.719	2.34115	down
AT4G24415	MIR824a; miRNA	31.4445	27.6184	39.8089	4.93119	6.50487	11.4279	-2.03188	6.33633e-10	5.83161e-08	32.9572	7.62132	down
AT4G24510	HXXXD-type acyl-transferase family protein	24.0959	28.3772	24.1449	9.14793	8.165	7.94273	-1.56903	1.74075e-17	5.78257e-15	25.5393	8.41855	down
AT4G24570	dicarboxylate carrier 2	361.66	217.912	339.403	787.55	1199.11	651.826	1.5539	6.98425e-10	6.29174e-08	306.325	879.494	up
AT4G24960	HVA22 homologue D	356.01	469.753	439.372	180.298	132.032	256.714	-1.0945	6.41229e-05	0.00149973	421.712	189.681	down
AT4G25470	C-repeat/DRE binding factor 2	4.31354	4.56405	3.61678	10.1977	9.46732	8.29204	1.194	9.19106e-07	3.86935e-05	4.16479	9.31902	up
AT4G25490	C-repeat/DRE binding factor 1	3.36868	2.32099	3.81189	11.9156	8.52268	8.30761	1.61829	1.33461e-08	8.70361e-07	3.16719	9.58197	up
AT4G26150	cytokinin-responsive gata factor 1	3.86942	6.57631	7.97252	1.48278	1.25407	0.960452	-2.31188	7.32188e-11	8.23614e-09	6.13941	1.23244	down
AT4G26255	other RNA	3.07869	2.00019	2.54283	1.21196	0.311215	0.512451	-1.9051	8.54652e-05	0.00191868	2.54057	0.678543	down
AT4G26890	mitogen-activated protein kinase kinase kinase 16	1.46783	1.7966	1.88386	3.30584	4.53552	4.25331	1.2769	4.00004e-05	0.0010308	1.7161	4.03156	up
AT4G27280	Calcium-binding EF-hand family protein	101.7	56.5035	71.8787	288.223	298.181	168.089	1.73682	7.41994e-13	1.19506e-10	76.694	251.498	up
AT4G27310	B-box type zinc finger family protein	28.3328	29.7465	28.39	9.47495	12.4621	15.6421	-1.13829	8.45224e-06	0.000267403	28.8231	12.5264	down
AT4G27590	Heavy metal transport/detoxification superfamily protein	0.938088	0.957863	2.03268	0.3567	0.146553	0.0301645	-2.95583	0.000140962	0.00290674	1.30954	0.177806	down
AT4G27652		146.888	103.648	137.05	394.828	523.426	372.323	1.77347	4.73307e-18	1.64959e-15	129.195	430.193	up
AT4G27654		139.21	91.9658	134.984	445.193	634.367	529.294	2.18396	1.06114e-21	5.63994e-19	122.053	536.285	up
AT4G27657		63.8177	55.879	65.3699	183.431	223.278	184.224	1.71378	9.79978e-21	4.62985e-18	61.6889	196.978	up
AT4G27730	oligopeptide transporter 1	6.34787	7.91662	5.12403	4.86281	1.76816	2.50437	-1.07862	0.000892577	0.0127528	6.46284	3.04511	down
AT4G27950	cytokinin response factor 4	9.0167	12.6754	8.11223	3.31409	3.59389	4.72935	-1.29824	1.0384e-05	0.00031883	9.93476	3.87911	down
AT4G28110	myb domain protein 41	0.852894	0.0840316	0.233441	0	0	0	-5.76477	0.00118105	0.0158018	0.390122	0	down
AT4G28250	expansin B3	15.3762	9.52179	10.783	6.66539	4.15555	3.79882	-1.26647	1.50493e-06	5.95805e-05	11.8937	4.87325	down
AT4G28290		38.3056	42.2561	64.867	13.8378	11.824	28.0089	-1.36374	0.000175764	0.00350868	48.4763	17.8902	down
AT4G29190	Zinc finger C-x8-C-x5-C-x3-H type family protein	35.3531	46.0435	42.3427	9.85512	7.78617	10.1825	-2.11326	4.62759e-22	2.73285e-19	41.2464	9.27461	down
AT4G29700	Alkaline-phosphatase-like family protein	32.0508	40.5409	34.6902	20.692	14.5384	15.9904	-1.04137	1.29788e-07	6.73301e-06	35.7606	17.0736	down
AT4G29740	cytokinin oxidase 4	67.877	57.6079	77.7076	25.4301	24.327	19.483	-1.52784	2.73067e-17	8.53737e-15	67.7308	23.08	down
AT4G29780		399.876	241.574	333.676	861.723	1113.79	589.009	1.42178	2.31673e-09	1.87991e-07	325.042	854.842	up
AT4G29930	basic helix-loop-helix (bHLH) DNA-binding superfamily protein	4.09672	4.43598	6.54455	2.7252	0.690207	0.42619	-2.02842	0.00010248	0.00224379	5.02575	1.28053	down
AT4G29990	Leucine-rich repeat transmembrane protein kinase protein	0.570849	0.534309	0.391216	1.01183	1.1635	0.882786	1.06998	0.0021357	0.0251273	0.498791	1.01937	up
AT4G30080	auxin response factor 16	12.6218	17.0274	16.4665	5.29931	3.62578	5.06809	-1.68571	1.96535e-12	2.92191e-10	15.3719	4.6644	down
AT4G30290	xyloglucan endotransglucosylase/hydrolase 19	22.582	19.9235	21.8532	6.60712	5.66913	3.38945	-2.03046	2.27323e-18	8.33255e-16	21.4529	5.2219	down
AT4G30400	RING/U-box superfamily protein	1.73571	3.22461	1.45881	0.855543	0.474533	0.502311	-1.79781	5.17945e-05	0.00126424	2.13971	0.610796	down
AT4G30940	BTB/POZ domain with WD40/YVTN repeat-like protein	2.21983	2.62898	2.19886	1.28429	0.447646	1.26589	-1.18713	0.00397796	0.0391897	2.34922	0.999275	down
AT4G32190	Myosin heavy chain-related protein	40.101	45.7981	45.1312	18.4608	16.0485	16.6673	-1.32354	8.22136e-15	1.83985e-12	43.6767	17.0588	down
AT4G32290	Core-2/I-branching beta-1,6-N-acetylglucosaminyltransferase family protein	14.3677	18.8939	17.4444	7.72571	3.74948	8.56793	-1.29193	3.1568e-05	0.000843135	16.902	6.68104	down
AT4G32780	phosphoinositide binding	2.74446	3.59631	0.69199	1.25227	0.0857507	0.176498	-2.26654	0.00522967	0.047965	2.34425	0.50484	down
AT4G33610	glycine-rich protein	2.23417	0	0.209344	0.0561247	0	0	-5.41881	0.00331083	0.0343702	0.814504	0.0187082	down
AT4G34050	S-adenosyl-L-methionine-dependent methyltransferases superfamily protein	401.71	408.623	413.834	197.183	177.232	165.471	-1.15038	1.68123e-15	4.46786e-13	408.056	179.962	down
AT4G34138	UDP-glucosyl transferase 73B1	3.43576	2.24636	3.17496	5.91731	6.62059	6.30861	1.1354	9.38584e-06	0.000292585	2.95236	6.28217	up
AT4G34230	cinnamyl alcohol dehydrogenase 5	248.822	278.891	405.065	101.021	77.1092	111.913	-1.6453	5.90027e-11	6.74408e-09	310.926	96.6813	down
AT4G34410	redox responsive transcription factor 1	200.723	128.47	178.682	677.092	868.961	679.997	2.17469	1.79516e-25	1.59021e-22	169.292	742.017	up
AT4G34412		32.5681	25.5719	28.8211	83.021	81.0107	99.6618	1.65386	1.80793e-15	4.68739e-13	28.987	87.8978	up
AT4G34990	myb domain protein 32	18.0043	20.5382	24.7079	3.31207	3.30349	6.26878	-2.22304	9.66807e-12	1.32609e-09	21.0835	4.29478	down
AT4G35110	Arabidopsis phospholipase-like protein (PEARLI 4) family	48.678	51.2744	52.09	20.9344	19.4272	27.5896	-1.10724	7.75454e-07	3.31047e-05	50.6808	22.6504	down
AT4G35160	O-methyltransferase family protein	49.1643	39.4177	101.086	1.69801	0.523228	2.28992	-5.33689	6.67807e-14	1.20319e-11	63.2227	1.50372	down
AT4G35380	SEC7-like guanine nucleotide exchange family protein	0.194944	0.182465	0.17631	0.614491	0.888493	0.443699	1.8375	6.7522e-06	0.000218496	0.184573	0.648894	up
AT4G35720	Arabidopsis protein of unknown function (DUF241)	1.03361	0.932898	0.319952	0.0343114	0.0951554	0.0522281	-3.59148	0.000145993	0.00299595	0.762153	0.060565	down
AT4G36000	Pathogenesis-related thaumatin superfamily protein	2.67346	1.6285	2.57465	6.46871	6.89142	7.77515	1.67227	7.78995e-08	4.23566e-06	2.2922	7.04509	up
AT4G36110	SAUR-like auxin-responsive protein family	6.51041	8.36109	8.35483	3.65892	1.86466	4.71268	-1.12534	0.00256922	0.028718	7.74211	3.41209	down
AT4G36240	GATA transcription factor 7	6.63666	8.03887	6.55584	2.6761	1.34176	3.52116	-1.4309	0.000166337	0.00335196	7.07712	2.51301	down
AT4G36430	Peroxidase superfamily protein	1.85786	0.238677	0.189443	0.135438	0.0626015	0	-3.55954	0.00213037	0.0250923	0.761992	0.0660133	down
AT4G36610	alpha/beta-Hydrolases superfamily protein	0.616337	0.0721107	0.100162	0	0	0	-5.40922	0.00431138	0.0414938	0.26287	0	down
AT4G36920	Integrase-type DNA-binding superfamily protein	13.7124	14.0944	15.9127	6.89197	5.82566	5.06577	-1.2757	6.01689e-11	6.8406e-09	14.5732	5.9278	down
AT4G37095		4.31812	2.35767	4.36643	7.0238	10.2033	21.1284	1.89546	0.00298801	0.0317847	3.68074	12.7852	up
AT4G37150	methyl esterase 9	1.14221	1.47001	2.22748	0.486595	0.0408929	0	-3.31416	0.000189378	0.00371076	1.61324	0.175829	down
AT4G37240		9.87792	14.876	11.0312	35.0185	30.7399	25.0396	1.36232	3.84252e-09	2.92803e-07	11.9284	30.266	up
AT4G37290		0.154218	0	0.200499	0.788386	2.51769	0.872773	3.58247	0.000664367	0.0102574	0.118239	1.39295	up
AT4G37409		20.8508	9.30895	18.5762	0.243268	0.17491	0	-6.91752	1.37603e-12	2.167e-10	16.2453	0.139393	down
AT4G37410	cytochrome P450, family 81, subfamily F, polypeptide 4	20.4339	8.66082	18.0895	0.119452	0.287105	0.0181828	-6.80395	1.70854e-15	4.48439e-13	15.7281	0.14158	down
AT4G37620	transposable element gene	0.443716	1.4536	0.576875	2.16523	2.85943	5.41464	2.15709	0.00198748	0.0236802	0.82473	3.47977	up
AT4G37700		2.27921	0.894615	3.05878	0.546703	0	0.312067	-2.84722	0.000836586	0.0121571	2.07753	0.286257	down
AT4G37790	Homeobox-leucine zipper protein family	195.232	223.104	280.184	71.1681	63.5414	80.7909	-1.65483	7.56433e-14	1.34777e-11	232.84	71.8335	down
AT4G38620	myb domain protein 4	41.2687	39.2709	43.4593	11.4436	7.03282	15.4972	-1.80619	3.37983e-10	3.35772e-08	41.333	11.3245	down
AT4G38840	SAUR-like auxin-responsive protein family	19.8489	44.0613	19.9721	10.1788	7.90667	12.3737	-1.41382	6.18378e-05	0.00145428	27.9607	10.153	down
AT4G39570	Galactose oxidase/kelch repeat superfamily protein	13.2016	10.0344	12.2653	24.7406	27.8451	22.3834	1.11501	6.04005e-09	4.36774e-07	11.8338	24.9897	up
AT4G39580	Galactose oxidase/kelch repeat superfamily protein	4.0023	3.4523	2.85676	7.25775	13.0814	4.71882	1.30499	0.000212985	0.00406834	3.43712	8.35265	up
AT4G39838		172.798	197.191	196.365	111.636	97.4609	70.4754	-1.0038	1.73387e-08	1.10036e-06	188.785	93.1909	down
AT4G39980	3-deoxy-D-arabino-heptulosonate 7-phosphate synthase 1	421.307	433.715	457.106	222.449	143.298	157.435	-1.30451	1.01937e-12	1.62947e-10	437.376	174.394	down
AT4G40010	SNF1-related protein kinase 2.7	2.18571	2.16383	2.04016	0.859512	0.939023	0.981248	-1.15208	0.00501457	0.046592	2.1299	0.926595	down
AT4G40060	homeobox protein 16	65.9245	82.937	75.7641	22.5752	13.0276	29.5988	-1.72772	3.29373e-09	2.58394e-07	74.8752	21.7338	down
AT4G40070	RING/U-box superfamily protein	1.79391	2.0149	2.82699	0.788227	0.924837	1.03831	-1.22364	0.00250086	0.0281845	2.21193	0.917124	down
AT5G01075	Glycosyl hydrolase family 35 protein	20.1262	23.1484	16.7788	11.9693	6.00866	7.29981	-1.23132	1.92989e-05	0.00054633	20.0178	8.42591	down
AT5G01320	Thiamine pyrophosphate dependent pyruvate decarboxylase family protein	0.377348	0.602507	0.442493	1.03158	0.972694	1.66446	1.43075	0.00230609	0.0266599	0.474116	1.22291	up
AT5G01335	transposable element gene	5.21525	3.43142	4.43587	2.57828	1.47745	1.41722	-1.24193	8.44446e-07	3.59058e-05	4.36085	1.82432	down
AT5G01790		8.79681	9.78726	8.29583	5.65667	2.89982	3.79643	-1.10049	0.000216043	0.00411146	8.95997	4.11764	down
AT5G01820	serine/threonine protein kinase 1	30.4047	34.1869	28.3685	12.31	13.6935	10.6505	-1.31093	3.60107e-13	6.02825e-11	30.9867	12.218	down
AT5G01840	ovate family protein 1	6.69644	7.72742	5.00895	3.9221	1.57639	3.60155	-1.05032	0.00479179	0.0450245	6.4776	3.03334	down
AT5G01900	WRKY DNA-binding protein 62	4.08142	1.78274	3.89125	1.51744	1.63656	1.02658	-1.19828	0.00490203	0.0459107	3.2518	1.39352	down
AT5G02170	Transmembrane amino acid transporter family protein	35.7713	24.8339	29.8722	14.1178	10.3077	4.56829	-1.64747	2.57387e-08	1.55899e-06	30.1592	9.66459	down
AT5G03890		13.9339	20.8672	16.4815	5.18052	4.29603	7.94365	-1.49461	1.03209e-05	0.000317542	17.0942	5.80673	down
AT5G03960	IQ-domain 12	0.260933	0.0610576	0.0848096	0.727594	0.532482	0.646058	2.29831	0.00349611	0.0357171	0.1356	0.635378	up
AT5G04250	Cysteine proteinases superfamily protein	23.6884	29.2478	31.385	12.1219	9.04896	13.6755	-1.23092	4.22387e-07	1.9229e-05	28.1071	11.6155	down
AT5G04820	ovate family protein 13	2.46736	4.08591	2.13855	0.917345	0.750171	1.58433	-1.34362	0.00340168	0.0350726	2.89727	1.08395	down
AT5G04950	nicotianamine synthase 1	0.461789	0.797963	1.75493	4.25921	3.38794	3.19138	1.84694	4.8625e-05	0.00120486	1.00489	3.61285	up
AT5G05250		5.56709	6.24428	4.30678	13.6419	8.34139	14.4186	1.22522	3.8529e-05	0.00100015	5.37272	12.1339	up
AT5G05300		65.3168	60.1973	78.4625	96.6576	172.183	142.469	1.06272	5.59844e-05	0.00134014	67.9922	137.103	up
AT5G05410	DRE-binding protein 2A	22.1914	14.5139	16.1915	34.4152	53.9508	39.5379	1.32428	3.34838e-08	1.93442e-06	17.6323	42.6346	up
AT5G05890	UDP-Glycosyltransferase superfamily protein	0.0592909	0.416218	0.128474	2.12172	0.483977	0.629151	2.38235	0.00228372	0.0265021	0.201328	1.07828	up
AT5G06510	nuclear factor Y, subunit A10	0.774562	0.776767	1.24677	0.257121	0.261459	0.0782769	-2.25307	0.000298003	0.00536911	0.9327	0.198952	down
AT5G06980		13.2146	18.9133	17.8618	6.9654	6.58274	9.18259	-1.08709	4.35849e-05	0.00110707	16.6632	7.57691	down
AT5G07580	Integrase-type DNA-binding superfamily protein	62.884	95.7588	74.4534	21.6188	16.279	39.2668	-1.52253	4.11701e-06	0.000140269	77.6988	25.7215	down
AT5G07610	F-box family protein	7.53448	10.0043	8.53506	3.90873	2.6799	5.1069	-1.10051	0.000407205	0.00693128	8.69127	3.89851	down
AT5G07620	Protein kinase superfamily protein	4.42607	7.01967	5.61225	1.63796	2.39451	1.62352	-1.56284	2.96764e-06	0.000108034	5.686	1.88533	down
AT5G08200	peptidoglycan-binding LysM domain-containing protein	23.0996	29.0102	28.22	13.221	11.1181	10.1285	-1.19816	2.30245e-10	2.39951e-08	26.7766	11.4892	down
AT5G09480	hydroxyproline-rich glycoprotein family protein	2.09955	0.159337	0.196729	0	0	0	-6.48204	0.000133469	0.00278673	0.818537	0	down
AT5G09530	hydroxyproline-rich glycoprotein family protein	15.6265	0.888888	2.26981	0.615218	0.420362	0.183223	-3.91427	0.000650583	0.0101403	6.26173	0.406268	down
AT5G10140	K-box region and MADS-box transcription factor family protein	0.310135	1.16113	1.53602	2.14139	3.15969	3.38495	1.56439	0.00363794	0.0366379	1.00243	2.89534	up
AT5G10410	ENTH/ANTH/VHS superfamily protein	28.2012	34.0633	41.1685	7.58385	5.06331	12.2311	-1.9901	1.08047e-09	9.29992e-08	34.4777	8.29276	down
AT5G11160	adenine phosphoribosyltransferase 5	5.55891	5.08483	7.15413	3.01402	2.35202	3.24726	-1.00376	0.00111675	0.0151224	5.93262	2.8711	down
AT5G11790	N-MYC downregulated-like 2	220.91	255.758	262.924	100.079	72.6295	99.2613	-1.40505	6.23214e-12	8.77453e-10	246.531	90.6565	down
AT5G12010		112.957	148.76	161.663	49.1387	48.2643	55.7179	-1.42709	4.54847e-11	5.40226e-09	141.127	51.0403	down
AT5G12300	Calcium-dependent lipid-binding (CaLB domain) family protein	5.79	4.02264	6.467	3.05147	2.46185	0.971203	-1.33967	0.000245142	0.00459489	5.42654	2.16151	down
AT5G13460	IQ-domain 11	9.58607	12.6876	8.17875	4.59425	2.85282	4.23834	-1.34288	7.28808e-07	3.13653e-05	10.1508	3.89514	down
AT5G13930	Chalcone and stilbene synthase family protein	8.40092	8.33553	3.60209	1.07608	0.663173	1.70099	-2.47916	3.34754e-09	2.60691e-07	6.77951	1.14675	down
AT5G14940	Major facilitator superfamily protein	4.87833	5.08927	6.25423	2.17269	1.68102	2.10296	-1.40877	1.87687e-07	9.30256e-06	5.40728	1.98556	down
AT5G15310	myb domain protein 16	2.53873	5.19017	1.93983	0.838312	0.861066	0.921599	-1.83988	3.23159e-05	0.000858796	3.22291	0.873659	down
AT5G15410	Cyclic nucleotide-regulated ion channel family protein	113.155	140.818	128.103	64.9149	55.5602	40.0602	-1.23784	3.61106e-11	4.38692e-09	127.359	53.5118	down
AT5G15500	Ankyrin repeat family protein	2.64352	3.10991	3.46836	6.24417	8.50215	4.3063	1.06182	0.000190031	0.00371737	3.07393	6.35087	up
AT5G15845	other RNA	12.2662	11.2046	8.31068	1.90325	1.67483	2.33995	-2.36498	2.30087e-20	1.0634e-17	10.5938	1.97267	down
AT5G15850	CONSTANS-like 1	14.4147	16.371	11.0704	2.78624	2.75485	3.89079	-2.08756	7.05049e-15	1.62928e-12	13.952	3.14396	down
AT5G16010	3-oxo-5-alpha-steroid 4-dehydrogenase family protein	272.827	329.967	384.731	149.868	125.473	154.26	-1.16406	3.18106e-08	1.85795e-06	329.175	143.2	down
AT5G16350	O-acyltransferase (WSD1-like) family protein	1.54832	1.4742	1.01806	0.719567	0.160563	0.113308	-2.06906	0.000749874	0.0112349	1.34686	0.331146	down
AT5G16560	Homeodomain-like superfamily protein	7.48495	9.07114	8.41869	4.14209	4.05212	3.27493	-1.09805	1.91064e-07	9.44654e-06	8.32492	3.82304	down
AT5G17220	glutathione S-transferase phi 12	7.00652	5.70495	2.07363	0.158839	0.0489452	0	-6.237	1.68905e-12	2.5834e-10	4.92837	0.0692615	down
AT5G17350		99.0445	87.0127	100.283	184.611	243.222	223.851	1.23436	4.69655e-10	4.45753e-08	95.4466	217.228	up
AT5G17460		28.0586	31.1029	40.9015	13.8715	10.6945	21.4627	-1.05888	0.00036359	0.00629473	33.3543	15.3429	down
AT5G17490	RGA-like protein 3	31.8721	33.5944	37.5816	16.6599	10.003	13.3168	-1.33833	5.72023e-10	5.31057e-08	34.3494	13.3266	down
AT5G17600	RING/U-box superfamily protein	19.4549	23.4962	23.5899	4.78936	2.07181	7.52392	-2.13858	1.41016e-08	9.14022e-07	22.1803	4.79503	down
AT5G17860	calcium exchanger 7	33.0117	29.2307	34.8291	8.94425	10.1823	7.29586	-1.84882	1.63465e-23	1.08602e-20	32.3572	8.80746	down
AT5G18220	O-Glycosyl hydrolases family 17 protein	0.241367	0.367115	0.156901	0.953469	0.803642	1.08851	1.94919	0.000995375	0.0138927	0.255128	0.948541	up
AT5G18670	beta-amylase 3	3.26325	5.76458	3.64501	1.68744	0.84907	1.52815	-1.60625	6.34829e-06	0.000206368	4.22428	1.35489	down
AT5G19097	transposable element gene	1.20562	0.401652	0.673021	0.313389	0.149242	0.0433667	-2.1989	0.00018195	0.00360173	0.760099	0.168666	down
AT5G19100	Eukaryotic aspartyl protease family protein	12.2319	9.22961	9.16648	6.54172	4.10703	4.25996	-1.0134	4.3786e-05	0.0011082	10.2093	4.96957	down
AT5G19110	Eukaryotic aspartyl protease family protein	98.4535	53.191	56.4429	34.716	19.6919	19.3958	-1.47138	2.47909e-08	1.51453e-06	69.3625	24.6012	down
AT5G19160	TRICHOME BIREFRINGENCE-LIKE 11	1.30042	1.45627	1.06674	2.46059	2.6737	2.34913	1.0084	0.000854478	0.0123328	1.27447	2.49447	up
AT5G19580	glyoxal oxidase-related protein	1.90166	1.23226	1.05052	0.874066	0.466851	0.162615	-1.49883	0.00362279	0.0365343	1.39482	0.501178	down
AT5G19875		38.1115	37.5062	38.8308	16.9582	13.9348	22.6107	-1.0387	4.19141e-05	0.00107231	38.1495	17.8346	down
AT5G20150	SPX domain gene 1	10.8003	14.7247	11.9749	4.65943	6.65357	2.79663	-1.3995	4.00208e-06	0.000137677	12.5	4.70321	down
AT5G20270	heptahelical transmembrane protein1	24.4657	28.4907	23.0779	11.636	11.3027	11.0588	-1.124	2.56884e-09	2.06089e-07	25.3448	11.3325	down
AT5G20670	Protein of unknown function (DUF1677)	3.02836	4.46982	3.48289	1.62392	1.35108	1.35955	-1.31356	0.000890503	0.0127317	3.66036	1.44485	down
AT5G20960	aldehyde oxidase 1	0.97721	0.72064	0.710095	2.19276	3.12114	1.20802	1.45645	1.24542e-05	0.000372399	0.802648	2.17397	up
AT5G21482	cytokinin oxidase 7	15.7116	15.8043	17.2505	10.8859	6.81173	6.42141	-1.00344	3.12157e-06	0.000112292	16.2555	8.03968	down
AT5G22250	Polynucleotidyl transferase, ribonuclease H-like superfamily protein	98.7081	66.3771	93.0907	177.853	244.651	211.04	1.34423	1.00657e-09	8.69905e-08	86.0586	211.181	up
AT5G22380	NAC domain containing protein 90	41.7563	23.8468	32.059	60.9257	87.3583	94.6818	1.38209	2.2099e-07	1.07511e-05	32.554	80.9886	up
AT5G22680		0.375091	0.351081	0.216736	1.16213	0.859445	1.99009	2.17633	0.00338672	0.0349523	0.314302	1.33722	up
AT5G23020	2-isopropylmalate synthase 2	4.42853	6.19456	3.3479	19.8722	28.7289	11.3303	2.11535	1.93928e-11	2.51396e-09	4.657	19.9772	up
AT5G23530	carboxyesterase 18	3.70093	2.05589	2.37319	1.81785	1.08585	0.787558	-1.12994	0.00342867	0.0352358	2.71	1.23042	down
AT5G23820	MD-2-related lipid recognition domain-containing protein	165.816	194.317	133.616	83.4271	55.4303	65.6234	-1.24126	2.44837e-09	1.97168e-07	164.583	68.1602	down
AT5G24230	Lipase class 3-related protein	1.38212	2.09448	2.65255	0.642325	1.01791	0.838057	-1.25751	0.00436363	0.0419019	2.04305	0.832766	down
AT5G24290	Vacuolar iron transporter (VIT) family protein	15.3237	12.266	15.9258	9.49536	5.6996	5.72259	-1.04121	5.24323e-06	0.00017472	14.5052	6.97252	down
AT5G24420	6-phosphogluconolactonase 5	136.564	98.616	130.406	29.308	16.6559	32.1598	-2.17415	2.49255e-16	6.97258e-14	121.862	26.0412	down
AT5G24470	pseudo-response regulator 5	47.4572	53.9091	41.1327	19.6128	12.2836	14.8716	-1.57922	1.52213e-14	3.20401e-12	47.4997	15.5893	down
AT5G24530	2-oxoglutarate (2OG) and Fe(II)-dependent oxygenase superfamily protein	67.8727	52.8172	42.8706	23.324	16.9566	20.8292	-1.37621	1.0965e-10	1.19546e-08	54.5202	20.37	down
AT5G24570		22.4241	42.5274	28.0927	10.1028	6.64691	12.8845	-1.59913	2.9526e-06	0.000107671	31.0147	9.87808	down
AT5G24770	vegetative storage protein 2	2624.09	1999.59	2189.24	197.076	127.684	166.686	-3.75551	2.36005e-81	2.50873e-77	2270.98	163.816	down
AT5G24780	vegetative storage protein 1	1867.16	1464.01	1910.08	119.695	91.1826	118.345	-3.95042	8.36131e-89	1.77762e-84	1747.09	109.741	down
AT5G25810	Integrase-type DNA-binding superfamily protein	5.52715	9.65421	5.95991	1.77988	0.598316	3.23267	-1.83081	0.000233328	0.00440156	7.04709	1.87029	down
AT5G25830	GATA transcription factor 12	1.3921	2.49102	1.77439	0.418625	0.351808	0.405505	-2.23197	1.669e-05	0.000482106	1.88584	0.391979	down
AT5G25920		0.93804	0.947312	1.36931	2.01911	2.09984	2.37494	1.03784	0.00318573	0.0333474	1.08489	2.16463	up
AT5G25980	glucoside glucohydrolase 2	2961.44	2765.78	2260.63	1359.72	1053.3	565.243	-1.41999	3.54114e-09	2.72771e-07	2662.62	992.755	down
AT5G26220	ChaC-like family protein	120.245	127.172	121.672	31.5167	34.8884	41.3221	-1.72346	8.74871e-17	2.56177e-14	123.03	35.9091	down
AT5G26260	TRAF-like family protein	8.97176	4.72747	8.66894	0.0926563	0.0285514	0.235066	-5.83559	4.32615e-28	4.18064e-25	7.45606	0.118758	down
AT5G27060	receptor like protein 53	17.8182	9.05237	17.3925	7.17148	4.86959	3.50802	-1.49984	1.51096e-07	7.70338e-06	14.7544	5.18303	down
AT5G27420	carbon/nitrogen insensitive 1	37.1017	16.8213	25.3088	51.7141	91.2475	46.0205	1.29585	1.74772e-05	0.000502794	26.4106	62.994	up
AT5G28080	Protein kinase superfamily protein	0	0	0	0.27661	0.418428	0.516742	6.51354	9.54642e-06	0.000296288	0	0.403926	up
AT5G28150	Plant protein of unknown function (DUF868)	26.5016	37.9206	37.6758	13.8736	11.2547	21.3982	-1.07395	0.000281571	0.0051265	34.0327	15.5088	down
AT5G28235	Ulp1 protease family protein	1.01123	0.242692	1.37088	0.144602	0.0445582	0.110055	-3.10141	8.79297e-05	0.00196364	0.874934	0.0997387	down
AT5G28300	Duplicated homeodomain-like superfamily protein	47.6107	65.0109	52.7744	10.9831	7.34441	9.68048	-2.52995	6.02328e-31	6.73974e-28	55.132	9.33599	down
AT5G28610		5.26049	4.5842	4.87389	7.58718	19.8725	12.6398	1.50067	9.14524e-05	0.0020274	4.90619	13.3665	up
AT5G35390	Leucine-rich repeat protein kinase family protein	0	0	0	0.222484	0.261763	0.0769684	5.64251	0.000741008	0.0111335	0	0.187072	up
AT5G35580	Protein kinase superfamily protein	1.75042	1.06625	1.63756	2.60834	3.963	2.20138	1.00975	0.00427418	0.0411918	1.48474	2.92424	up
AT5G36970	NDR1/HIN1-like 25	0	0	0	0.440582	0.712752	0.754476	6.03127	0.000109437	0.00235728	0	0.635937	up
AT5G38005	other RNA	1.21818	2.2044	1.12623	0.30194	0.279122	0.114902	-2.72119	0.00109911	0.0149604	1.51627	0.231988	down
AT5G38120	AMP-dependent synthetase and ligase family protein	28.5429	18.8089	23.785	8.42299	3.40932	3.06045	-2.26155	4.24028e-13	6.98825e-11	23.7123	4.96425	down
AT5G38130	HXXXD-type acyl-transferase family protein	9.22728	7.44733	10.2264	0.702997	0.363928	0.449436	-4.13101	1.05567e-37	1.8703e-34	8.96701	0.505454	down
AT5G38210	Protein kinase family protein	28.0098	22.3479	28.7103	55.2619	74.9581	36.5848	1.0972	3.70045e-06	0.000128548	26.356	55.6016	up
AT5G38212		24.0838	17.2372	22.2097	48.8797	62.6958	29.2476	1.16695	2.04374e-06	7.88564e-05	21.1769	46.941	up
AT5G38280	PR5-like receptor kinase	6.26835	3.39863	5.3833	1.52763	1.06735	1.39249	-1.872	3.74115e-10	3.68226e-08	5.01676	1.32916	down
AT5G38400		1.16476	0.45425	8.8334	0.721744	0.0834001	0.549311	-2.94541	0.00295726	0.0316413	3.48414	0.451485	down
AT5G38430	Ribulose bisphosphate carboxylase (small chain) family protein	1008.19	1274.82	934.652	2181.81	2152.11	2107.74	1.03865	1.14707e-08	7.55006e-07	1072.55	2147.22	up
AT5G38700		96.9232	84.7569	98.1901	270.979	309.056	282.962	1.66621	6.50759e-22	3.73922e-19	93.2901	287.666	up
AT5G38710	Methylenetetrahydrofolate reductase family protein	187.241	140.319	206.97	78.416	88.8107	75.8059	-1.09977	2.24569e-08	1.38387e-06	178.177	81.0109	down
AT5G38780	S-adenosyl-L-methionine-dependent methyltransferases superfamily protein	0.0728571	0.272774	0.315738	1.11737	0.719918	0.979266	2.09878	0.00233235	0.026905	0.220457	0.93885	up
AT5G39080	HXXXD-type acyl-transferase family protein	6.82745	9.91617	8.2642	4.40388	2.25047	4.22612	-1.16308	0.000173918	0.0034751	8.33594	3.62682	down
AT5G39210	chlororespiratory reduction 7	16.9687	16.3053	16.7206	34.0629	37.8641	36.3314	1.15744	5.07364e-09	3.75838e-07	16.6649	36.0862	up
AT5G40150	Peroxidase superfamily protein	2.45092	2.02415	1.44952	6.67343	2.99784	3.24326	1.1372	0.00118754	0.0158488	1.97486	4.30484	up
AT5G40210	nodulin MtN21 /EamA-like transporter family protein	3.29846	3.58991	4.82021	2.35286	1.91141	0.841103	-1.21259	0.00175156	0.0214796	3.90286	1.70179	down
AT5G40350	myb domain protein 24	5.44335	4.25969	6.61284	13.644	13.418	16.476	1.46402	5.14126e-08	2.89929e-06	5.43863	14.5127	up
AT5G40390	Raffinose synthase family protein	17.648	18.1291	19.3506	8.01266	5.48477	6.69601	-1.41797	5.3517e-13	8.68528e-11	18.3759	6.73114	down
AT5G41040	HXXXD-type acyl-transferase family protein	2.95751	1.02614	1.74575	1.0901	0.240976	0.252506	-1.87526	0.00116171	0.0155963	1.9098	0.52786	down
AT5G41315	basic helix-loop-helix (bHLH) DNA-binding superfamily protein	2.15682	1.24562	1.63074	0.789091	0.532308	0.71419	-1.25961	0.00117539	0.0157558	1.67773	0.67853	down
AT5G41590	Protein of unknown function (DUF567)	0.331541	1.39643	1.77204	0.2568	0	0	-3.91134	0.000661527	0.0102284	1.16667	0.0856001	down
AT5G41750	Disease resistance protein (TIR-NBS-LRR class) family	107.84	50.8538	80.0047	217.204	247.143	85.2499	1.21294	0.000159677	0.00323562	79.5662	183.199	up
AT5G41761		1.48775	2.22804	1.35396	0.138284	0.127833	0.631477	-2.36028	0.00360492	0.0364297	1.68992	0.299198	down
AT5G42200	RING/U-box superfamily protein	2.1957	4.16439	1.70276	5.63921	5.90812	6.62185	1.21969	0.00181156	0.0220457	2.68762	6.0564	up
AT5G42380	calmodulin like 37	126.851	41.1657	81.5258	216.931	274.002	173.575	1.45515	3.42962e-06	0.000121321	83.1808	221.502	up
AT5G42680	Protein of unknown function, DUF617	6.3705	7.38666	6.84009	2.6513	3.75811	3.43039	-1.01726	0.000587999	0.009329	6.86575	3.27994	down
AT5G42800	dihydroflavonol 4-reductase	4.59555	2.28797	0.819223	0	0	0.161396	-5.34649	0.00167457	0.0207105	2.56758	0.0537985	down
AT5G42830	HXXXD-type acyl-transferase family protein	10.967	6.84333	8.58895	4.32455	4.49097	1.58157	-1.34182	6.61033e-05	0.00153423	8.79975	3.46569	down
AT5G43150		19.4654	14.3153	18.8798	7.17965	3.65039	10.3823	-1.24052	0.000825533	0.0120459	17.5535	7.07077	down
AT5G43500	actin-related protein 9	6.73928	5.53125	4.57821	20.2781	17.1633	12.8564	1.60264	1.07174e-14	2.349e-12	5.61625	16.7659	up
AT5G43650	basic helix-loop-helix (bHLH) DNA-binding superfamily protein	3.39709	2.48842	2.04826	11.6691	9.6874	8.60262	1.95312	1.82616e-12	2.7341e-10	2.64459	9.98638	up
AT5G44050	MATE efflux family protein	153.353	154.309	169.134	84.5032	80.2428	47.3846	-1.15774	6.90869e-09	4.92882e-07	158.932	70.7102	down
AT5G44190	GOLDEN2-like 2	24.211	34.2574	18.8259	16.4968	10.7265	6.40042	-1.20568	5.53164e-05	0.00133035	25.7648	11.2079	down
AT5G44370	phosphate transporter 4;6	10.6279	12.3309	14.796	6.81198	5.36497	5.07488	-1.11017	3.82935e-07	1.76599e-05	12.5849	5.75061	down
AT5G44550	Uncharacterised protein family (UPF0497)	1.85709	2.46248	0.134134	0.335636	0.0443245	0.145971	-3.07289	0.00155814	0.0195896	1.48457	0.17531	down
AT5G44910	Toll-Interleukin-Resistance (TIR) domain family protein	2.56054	2.28251	2.06078	6.57324	9.5338	6.16727	1.72802	1.7462e-07	8.77639e-06	2.30128	7.42477	up
AT5G45100	SBP (S-ribonuclease binding protein) family protein	39.4001	46.9412	50.8613	14.3614	16.6504	30.3771	-1.08487	0.000504734	0.00828587	45.7342	20.463	down
AT5G45330	decapping 5-like	3.53837	2.65338	3.24617	1.9233	1.90241	0.849006	-1.00944	0.00175393	0.0214796	3.14597	1.55824	down
AT5G45340	cytochrome P450, family 707, subfamily A, polypeptide 3	50.8381	40.183	39.8852	107.903	140.268	55.8856	1.23088	2.64801e-06	9.75678e-05	43.6354	101.352	up
AT5G45820	CBL-interacting protein kinase 20	2.57527	2.86073	1.71698	0.920639	1.26444	0.60059	-1.33908	0.000628821	0.00987351	2.38433	0.928556	down
AT5G46295		2.80678	1.51564	7.01748	0	0	0	-7.8272	1.79872e-08	1.12473e-06	3.77997	0	down
AT5G46350	WRKY DNA-binding protein 8	4.46668	2.31209	3.19685	1.85568	1.22116	0.909639	-1.30953	0.000473273	0.00783018	3.32521	1.32883	down
AT5G46690	beta HLH protein 71	4.861	9.40758	4.0548	1.52871	1.5074	0.723948	-2.28454	1.36456e-08	8.8717e-07	6.10779	1.25335	down
AT5G47060	Protein of unknown function (DUF581)	24.6633	23.5006	19.6048	7.64135	5.99476	12.6689	-1.28954	3.03045e-05	0.000815537	22.5896	8.76834	down
AT5G47220	ethylene responsive element binding factor 2	41.3161	32.9009	40.5555	131.287	134.727	181.68	2.02281	8.05855e-19	3.17268e-16	38.2575	149.232	up
AT5G47250	LRR and NB-ARC domains-containing disease resistance protein	2.56388	3.22776	2.40414	1.71414	1.12082	1.19855	-1.00074	0.000245844	0.00460092	2.73193	1.3445	down
AT5G47445	transposable element gene	5.29326	4.71726	5.02711	1.85808	2.2257	2.60923	-1.10862	8.98113e-05	0.00200146	5.01254	2.231	down
AT5G48660	B-cell receptor-associated protein 31-like	10.6079	10.6479	12.333	23.0177	24.9241	22.3315	1.10005	1.75638e-08	1.11133e-06	11.1963	23.4244	up
AT5G48930	hydroxycinnamoyl-CoA shikimate/quinate hydroxycinnamoyl transferase	354.726	376.662	398.727	73.2267	51.3091	69.3296	-2.50621	3.0019e-37	4.5586e-34	376.705	64.6218	down
AT5G49100		4.43875	5.8877	2.81396	2.28683	1.69993	1.63282	-1.19844	0.000202591	0.00390135	4.38014	1.87319	down
AT5G50450	HCP-like superfamily protein with MYND-type zinc finger	44.955	57.1538	62.6132	22.0055	15.0929	36.1977	-1.10177	0.000567027	0.00907838	54.9073	24.432	down
AT5G51190	Integrase-type DNA-binding superfamily protein	5.52594	3.38184	4.83557	23.2613	26.7537	16.6515	2.30562	6.5509e-19	2.62778e-16	4.58112	22.2221	up
AT5G51990	C-repeat-binding factor 4	6.62271	5.27818	9.54793	25.8416	25.9734	25.7444	1.88793	1.67164e-12	2.5753e-10	7.14961	25.8531	up
AT5G52020	Integrase-type DNA-binding superfamily protein	43.2335	45.817	45.9108	95.6045	132.704	181.988	1.67366	6.49785e-10	5.94993e-08	44.9871	136.765	up
AT5G52050	MATE efflux family protein	310.346	189.563	299.04	601.392	742.724	531.51	1.26704	7.58752e-09	5.37702e-07	266.316	625.209	up
AT5G52120	phloem protein 2-A14	26.9293	24.8178	38.4819	11.2315	11.332	16.4613	-1.15294	2.92097e-05	0.000789071	30.0763	13.0083	down
AT5G52390	PAR1 protein	6.18094	3.23653	8.69144	0.0803504	0.259974	0	-5.77246	4.03597e-18	1.43008e-15	6.0363	0.113441	down
AT5G52570	beta-carotene hydroxylase 2	29.2623	24.4224	27.2388	19.9409	8.03787	8.36776	-1.15678	7.53224e-05	0.00172374	26.9745	12.1155	down
AT5G52660	Homeodomain-like superfamily protein	18.6534	18.5768	20.2546	10.7079	8.28309	9.03641	-1.00514	1.37148e-07	7.05998e-06	19.1616	9.34247	down
AT5G52750	Heavy metal transport/detoxification superfamily protein	110.237	60.7173	95.426	153.051	235.016	204.058	1.20882	3.27759e-06	0.000117112	88.7934	197.375	up
AT5G52760	Copper transport protein family	116.435	45.8361	91.6131	165.073	227.171	192.225	1.2575	1.68403e-05	0.000485788	84.6282	194.823	up
AT5G52900		8.67857	16.2786	11.8547	3.54928	2.71433	7.49002	-1.34115	0.000781017	0.0115469	12.2706	4.58454	down
AT5G53290	cytokinin response factor 3	6.84444	6.66258	9.43895	2.9971	3.39791	3.18487	-1.22291	4.02173e-06	0.000137906	7.64866	3.19329	down
AT5G54060	UDP-glucose:flavonoid 3-o-glucosyltransferase	2.52325	1.63932	0.694688	0.0275918	0.0255067	0	-6.56934	1.89709e-08	1.18276e-06	1.61908	0.0176995	down
AT5G54145		9.79599	12.4483	13.2006	3.38951	1.96603	4.60303	-1.7723	1.47291e-06	5.86405e-05	11.815	3.31953	down
AT5G54160	O-methyltransferase 1	250.249	334.512	336.111	69.1575	65.2944	65.2097	-2.17414	1.50265e-29	1.59732e-26	306.957	66.5539	down
AT5G54300	Protein of unknown function (DUF761)	258.521	298.883	388.746	67.9851	62.8751	129.677	-1.78989	1.1092e-08	7.4156e-07	315.384	86.8457	down
AT5G54585		2.66777	2.1565	4.41428	1.35253	0.677254	0.60048	-1.82293	0.000394918	0.0067546	3.07952	0.876754	down
AT5G54630	zinc finger protein-related	4.74924	6.70732	3.87276	1.69782	1.03829	1.66991	-1.75485	1.62034e-07	8.24125e-06	5.10977	1.46867	down
AT5G54640	Histone superfamily protein	24.2805	33.5012	30.3342	13.0367	9.55024	19.4698	-1.00562	0.0012004	0.0159902	29.372	14.0189	down
AT5G55045	pre-tRNA	21.8272	38.0226	27.3265	5.07198	15.6289	8.14937	-1.55424	0.00361061	0.0364663	29.0588	9.61676	down
AT5G55050	GDSL-like Lipase/Acylhydrolase superfamily protein	93.513	113.021	129.266	50.1504	55.3598	51.824	-1.05871	1.1991e-07	6.27905e-06	111.933	52.4447	down
AT5G55090	mitogen-activated protein kinase kinase kinase 15	14.0964	17.3461	13.0437	5.77234	3.61388	5.99716	-1.48622	2.65473e-08	1.60339e-06	14.8287	5.12779	down
AT5G55930	oligopeptide transporter 1	15.9935	21.0664	19.9837	8.30082	7.21499	8.2496	-1.22733	2.82026e-09	2.24564e-07	19.0145	7.92181	down
AT5G56040	Leucine-rich receptor-like protein kinase family protein	9.98255	13.8386	8.54994	6.97538	5.72839	3.20537	-1.0223	0.000122638	0.00259971	10.7904	5.30305	down
AT5G56840	myb-like transcription factor family protein	9.58683	17.4432	10.9495	3.08129	1.69366	2.21837	-2.42175	1.14692e-13	1.95068e-11	12.6599	2.33111	down
AT5G57220	cytochrome P450, family 81, subfamily F, polypeptide 2	4.1101	3.84702	4.49749	6.87646	12.7577	5.4335	1.03291	0.000851588	0.0122994	4.15154	8.3559	up
AT5G57560	Xyloglucan endotransglucosylase/hydrolase family protein	772.324	508.496	684.378	1729.4	2410.45	1338.8	1.50937	4.20098e-11	5.04592e-09	655.066	1826.21	up
AT5G57660	CONSTANS-like 5	291.591	302.159	306.738	105.812	100.435	117.464	-1.43109	2.00714e-15	5.07997e-13	300.162	107.904	down
AT5G57780		1.98924	2.01707	0.862072	0.35952	0.617223	0.273627	-1.92896	0.00270222	0.0297818	1.6228	0.41679	down
AT5G58380	SOS3-interacting protein 1	21.8711	22.6026	22.6304	10.7511	9.37684	12.0585	-1.01312	6.58696e-07	2.8874e-05	22.368	10.7288	down
AT5G58480	O-Glycosyl hydrolases family 17 protein	1.86451	2.55063	1.46686	4.61252	3.13018	3.83521	1.01083	0.00143776	0.018436	1.96067	3.8593	up
AT5G58680	ARM repeat superfamily protein	9.88727	5.98027	8.41494	17.0198	22.2049	12.9788	1.13491	9.36976e-06	0.000292513	8.09416	17.4011	up
AT5G58860	cytochrome P450, family 86, subfamily A, polypeptide 1	3.06018	0.209583	0.0646918	0	0	0	-8.10769	0.00144434	0.0184868	1.11149	0	down
AT5G58940	calmodulin-binding receptor-like cytoplasmic kinase 1	13.1112	8.65957	15.492	24.0934	31.0923	21.2805	1.06833	1.90393e-05	0.000540422	12.4209	25.4887	up
AT5G59020	Protein of unknown function (DUF3527)	1.10199	1.46251	1.15472	0.703237	0.537033	0.372331	-1.20066	0.00118854	0.0158521	1.23974	0.537534	down
AT5G59510	ROTUNDIFOLIA like 5	12.4328	10.307	10.7759	6.5374	2.62489	5.37761	-1.16708	0.000657239	0.0101769	11.1719	4.84663	down
AT5G59580	UDP-glucosyl transferase 76E1	25.7945	28.5257	28.3306	10.2984	6.9964	12.981	-1.39409	1.22628e-07	6.40557e-06	27.5503	10.0919	down
AT5G59790	Domain of unknown function (DUF966)	7.26244	11.1153	8.81654	2.30873	1.58545	3.0792	-1.90754	1.34288e-09	1.13292e-07	9.06475	2.32446	down
AT5G59820	C2H2-type zinc finger family protein	59.5567	35.6399	45.3671	97.8573	115.396	99.0739	1.19871	2.07845e-08	1.28453e-06	46.8545	104.109	up
AT5G60700	glycosyltransferase family protein 2	12.8075	13.4221	13.3145	6.86787	4.96935	3.98805	-1.30925	1.22134e-10	1.3114e-08	13.1814	5.27509	down
AT5G60850	OBF binding protein 4	109.798	131.812	136.785	58.952	53.6162	59.2817	-1.10212	4.46298e-09	3.35275e-07	126.132	57.2833	down
AT5G61030	glycine-rich RNA-binding protein 3	19.68	21.9237	16.7563	38.8798	32.3607	44.4138	1.03696	3.2205e-06	0.000115266	19.4533	38.5514	up
AT5G61160	anthocyanin 5-aromatic acyltransferase 1	0.643894	2.75136	0.630878	5.33433	26.8691	4.17873	3.18662	0.00234649	0.0269948	1.34204	12.1274	up
AT5G61600	ethylene response factor 104	4.9555	4.12294	5.39641	16.1802	16.2676	7.3408	1.46166	8.5417e-07	3.62468e-05	4.82495	13.2628	up
AT5G62070	IQ-domain 23	99.174	128.496	123.175	31.3217	29.9602	49.1419	-1.60682	1.19893e-09	1.01957e-07	116.948	36.808	down
AT5G62180	carboxyesterase 20	8.97533	8.442	7.96988	2.0447	2.83527	4.45073	-1.36143	8.56716e-05	0.00192128	8.4624	3.11023	down
AT5G62920	response regulator 6	26.9018	40.5344	38.9136	13.8962	13.7441	14.6588	-1.2946	4.01766e-08	2.28383e-06	35.4499	14.0997	down
AT5G63340		23.6228	20.2748	22.1747	12.0485	14.4354	3.13711	-1.16752	0.00315238	0.0330798	22.0241	9.87369	down
AT5G63450	cytochrome P450, family 94, subfamily B, polypeptide 1	135.181	98.5231	178.97	80.3921	53.297	65.0831	-1.02589	2.49096e-05	0.000688634	137.558	66.2574	down
AT5G64870	SPFH/Band 7/PHB domain-containing membrane-associated protein family	61.0414	46.8599	66.4449	125.388	132.152	86.3812	1.00164	5.8373e-07	2.59626e-05	58.1154	114.641	up
AT5G65010	asparagine synthetase 2	16.0501	16.583	15.6153	33.6306	39.8851	26.4425	1.07776	5.50664e-09	4.02306e-07	16.0828	33.3194	up
AT5G65280	GCR2-like 1	91.4491	69.6907	103.692	44.7944	31.84	41.3822	-1.12864	2.23048e-07	1.08018e-05	88.2774	39.3389	down
AT5G65310	homeobox protein 5	104.941	130.295	104.853	50.1618	33.7564	50.0835	-1.30272	3.51577e-09	2.72771e-07	113.363	44.6672	down
AT5G65590	Dof-type zinc finger DNA-binding family protein	3.97742	5.27152	3.3922	3.01669	1.5584	1.30555	-1.10643	0.00156535	0.0196452	4.21371	1.96021	down
AT5G65630	global transcription factor group E7	197.887	195.679	195.672	100.105	88.7584	84.5416	-1.07596	3.99442e-14	7.44923e-12	196.413	91.1349	down
AT5G65683	Zinc finger (C3HC4-type RING finger) family protein	16.2011	17.2832	16.1652	7.33092	3.8748	5.3563	-1.55864	2.00361e-11	2.58162e-09	16.5498	5.52067	down
AT5G65970	Seven transmembrane MLO family protein	0.578571	0.631793	0.919356	1.88219	1.78138	1.19376	1.19647	0.00230496	0.0266599	0.709907	1.61911	up
AT5G66310	ATP binding microtubule motor family protein	1.46747	1.08554	0.553893	2.82696	2.1354	2.00925	1.20597	0.000263754	0.00484652	1.03563	2.32387	up
AT5G66770	GRAS family transcription factor	7.46357	8.57433	10.7815	4.37386	3.03249	3.15154	-1.32711	3.44773e-08	1.98641e-06	8.93981	3.5193	down
AT5G66800		0.645468	1.25146	0.63937	2.05697	3.40689	3.1963	1.82598	0.000122144	0.00259419	0.845432	2.88672	up
AT5G67180	target of early activation tagged (EAT) 3	11.2945	10.1691	12.1248	5.67532	3.74393	5.19142	-1.16327	1.02743e-06	4.25791e-05	11.1961	4.87022	down
AT5G67385	Phototropic-responsive NPH3 family protein	9.02254	8.19963	6.30534	24.5293	21.7558	11.9308	1.3188	6.86241e-08	3.75051e-06	7.8425	19.4053	up
AT5G67390		2.83376	4.58903	3.23584	1.63052	1.04352	1.40007	-1.35704	0.000472274	0.00781974	3.55288	1.35804	down
AT5G67450	zinc-finger protein 1	8.76033	8.70086	9.18439	26.6322	29.5829	31.5814	1.7675	4.49258e-17	1.36446e-14	8.88186	29.2655	up
ATCG01130	Ycf1 protein	0.115585	0.0386379	0.0500906	0.184172	0.468198	0.151852	2.02508	0.00302903	0.0321183	0.0681044	0.268074	up
ATMG00040	ATP synthase subunit C family protein	0.700327	1.1362	0.606997	1.95282	2.52734	3.99641	1.87149	0.000185629	0.00365154	0.814508	2.82552	up

## Sheet: C1vss1
DEGs between sad2-5 and Col-0 one day after inoculation of Pst DC3000
GeneID	Short_description	NormalizedTPM_Col_1d_rep1	NormalizedTPM_Col_1d_rep2	NormalizedTPM_Col_1d_rep3	NormalizedTPM_sad2_1d_rep1	NormalizedTPM_sad2_1d_rep2	NormalizedTPM_sad2_1d_rep3	Log2Foldchange_Col_1d_VS_sad2_1d	Pvalue_Col_1d_VS_sad2_1d	adjPvalue_Col_1d_VS_sad2_1d	MeanTPMCol_1d	MeanTPMsad2_1d	Significant
AT1G01250	Integrase-type DNA-binding superfamily protein	4.69037	6.00288	5.49331	2.37894	2.01804	0.850031	-1.658	2.04299e-05	0.00325021	5.39552	1.749	down
AT1G03820		18.6057	22.7551	33.4941	8.67801	13.7529	12.2694	-1.14793	7.79916e-05	0.00986641	24.9516	11.5668	down
AT1G04250	AUX/IAA transcriptional regulator family protein	13.4257	16.9723	19.0706	8.59159	9.6404	6.89722	-1.01191	1.06494e-05	0.0020745	16.4895	8.3764	down
AT1G04800	glycine-rich protein	7.99249	25.8807	11.0524	6.98421	1.52259	3.18295	-1.97678	0.000167592	0.0169896	14.9752	3.89658	down
AT1G09310	Protein of unknown function, DUF538	105.132	123.449	234.46	61.0741	59.515	35.442	-1.61905	7.13362e-07	0.000253908	154.347	52.0103	down
AT1G10240	FAR1-related sequence 11	4.79986	3.83627	2.60467	8.7961	6.84909	7.32867	1.01641	9.43898e-06	0.00194332	3.74693	7.65795	up
AT1G11545	xyloglucan endotransglucosylase/hydrolase 8	0.355152	0.282821	1.66758	0	0.0680674	0	-5.12278	0.000287862	0.0252933	0.768518	0.0226891	down
AT1G12845		1.53023	4.63891	12.5194	1.55225	0.866505	0.89219	-2.57229	0.000178228	0.0174897	6.22949	1.10365	down
AT1G12940	nitrate transporter2.5	2.60111	4.02009	2.53947	7.40647	5.37879	9.27541	1.24423	9.1799e-06	0.00190869	3.05356	7.35356	up
AT1G13480	Protein of unknown function (DUF1262)	2.88023	2.83718	2.40006	6.26946	4.08262	7.84482	1.14078	7.1905e-05	0.00938099	2.70582	6.06563	up
AT1G13530	Protein of unknown function (DUF1262)	2.25666	1.7625	1.35845	4.54306	3.46003	3.8709	1.12582	0.000108877	0.0130652	1.79254	3.958	up
AT1G14210	Ribonuclease T2 family protein	11.7316	9.38723	12.084	6.04176	4.79955	5.9658	-1.01383	5.17058e-06	0.00134052	11.0676	5.60237	down
AT1G14900	high mobility group A	4.1576	4.60709	2.8648	1.67106	1.87932	1.35452	-1.26166	7.48001e-05	0.00969631	3.8765	1.63497	down
AT1G22110	structural constituent of ribosome	0.175987	0.350363	0.0850132	1.05128	0.618367	0.983986	2.11189	0.000226269	0.0215007	0.203788	0.884546	up
AT1G22550	Major facilitator superfamily protein	2.33563	3.03535	2.91469	0.504564	0.642448	0.533461	-2.33072	1.85565e-13	2.29228e-10	2.76189	0.560157	down
AT1G24070	cellulose synthase-like A10	12.1172	15.228	11.364	5.202	3.525	3.88568	-1.64494	2.18808e-15	3.5346e-12	12.9031	4.20423	down
AT1G26208	other RNA	3.7548	5.01909	8.81515	2.04046	1.51637	1.79949	-1.7663	1.48955e-06	0.000453343	5.86301	1.78544	down
AT1G26290		5.95113	4.47583	5.86457	11.7382	10.7721	11.0914	1.01371	1.626e-05	0.00271	5.43051	11.2006	up
AT1G36920		0.0701626	0.139683	0	33.0241	28.7769	32.053	8.84273	4.34415e-25	2.28068e-21	0.0699486	31.2847	up
AT1G36922		0	0	0	26.2691	20.2971	23.8955	10.6833	5.74359e-19	1.72308e-15	0	23.4872	up
AT1G43590	transposable element gene	1.03085	1.97333	1.03424	3.78057	5.16721	3.20788	1.5718	0.000698302	0.0468509	1.34614	4.05189	up
AT1G45010	TRAM, LAG1 and CLN8 (TLC) lipid-sensing domain containing protein	2.89392	2.52613	3.36799	0.993579	1.27994	0.351434	-1.77519	0.000232079	0.0219534	2.92935	0.874984	down
AT1G45201	triacylglycerol lipase-like 1	82.1832	91.2401	122.114	63.3237	43.9974	40.159	-1.0433	6.79271e-06	0.00158496	98.5124	49.16	down
AT1G49430	long-chain acyl-CoA synthetase 2	1.4167	1.5134	1.35203	0.8237	0.562909	0.647782	-1.1027	0.000341148	0.0283166	1.42738	0.67813	down
AT1G51500	ABC-2 type transporter family protein	19.3635	22.4873	28.6734	14.7665	10.4952	10.0441	-1.03797	4.97638e-06	0.0013063	23.5081	11.7686	down
AT1G52000	Mannose-binding lectin superfamily protein	48.6014	53.7998	87.7145	28.7353	24.7567	20.1658	-1.41252	5.24788e-08	2.44901e-05	63.3719	24.5526	down
AT1G52030	myrosinase-binding protein 2	8.18743	7.32198	5.71515	4.58279	1.391	1.33568	-1.56723	0.000163871	0.016807	7.07485	2.43649	down
AT1G52040	myrosinase-binding protein 1	145.841	158.744	240.168	69.5306	64.6075	54.7472	-1.56945	6.65067e-12	6.65067e-09	181.584	62.9618	down
AT1G52410	TSK-associating protein 1	60.6246	69.8512	65.3434	43.9944	26.0877	20.5806	-1.14421	5.58102e-06	0.00141206	65.2731	30.2209	down
AT1G52560	HSP20-like chaperones superfamily protein	0.097818	0.0486852	0	3.47291	0.515557	1.496	5.24963	3.81148e-06	0.0010664	0.0488344	1.82816	up
AT1G54020	GDSL-like Lipase/Acylhydrolase superfamily protein	1.54965	3.40527	6.17793	0.415234	0.420285	0.576991	-3.03457	1.3093e-08	6.87384e-06	3.71095	0.470837	down
AT1G56600	galactinol synthase 2	41.0096	42.0833	61.4259	22.7572	19.0147	21.6242	-1.22814	1.0262e-08	5.56573e-06	48.1729	21.1321	down
AT1G58270	TRAF-like family protein	8.72815	12.4576	16.1126	5.36676	4.91549	7.63154	-1.09845	0.000165722	0.0168939	12.4328	5.97126	down
AT1G59359	Ribosomal protein S5 family protein	0	0	0	1.63128	1.3309	0.793363	7.58106	1.03364e-08	5.56573e-06	0	1.25185	up
AT1G61580	R-protein L3 B	38.2435	25.0046	24.9917	59.2151	73.5525	79.8343	1.25194	5.93166e-10	4.44875e-07	29.4133	70.8673	up
AT1G64390	glycosyl hydrolase 9C2	9.37067	9.28266	13.1156	5.55002	3.82365	3.71329	-1.31952	4.88797e-08	2.33289e-05	10.5896	4.36232	down
AT1G66100	Plant thionin	54.1013	56.0507	133.191	38.4826	29.552	42.6109	-1.19042	0.000650296	0.0449218	81.1143	36.8818	down
AT1G66870	Carbohydrate-binding X8 domain superfamily protein	0.541457	0.700673	1.01224	0.0274626	0.0259435	0.10685	-3.85667	6.19648e-06	0.00151309	0.751455	0.0534188	down
AT1G68530	3-ketoacyl-CoA synthase 6	55.4695	58.8391	83.945	29.4291	26.9857	25.9808	-1.3057	2.04735e-10	1.71977e-07	66.0846	27.4652	down
AT1G68600	Aluminium activated malate transporter family protein	55.7484	67.8513	86.9181	34.6266	42.6767	25.8107	-1.06697	1.17443e-05	0.0021864	70.1726	34.3713	down
AT1G71400	receptor like protein 12	0.625674	0.608327	0.493427	1.07748	1.07366	1.72283	1.14555	0.000779101	0.0497298	0.575809	1.29132	up
AT1G74290	alpha/beta-Hydrolases superfamily protein	8.5738	7.02847	6.85992	2.52146	3.96999	4.47866	-1.05287	9.09269e-05	0.0112986	7.4874	3.6567	down
AT1G75750	GAST1 protein homolog 1	81.9133	71.1586	89.0445	227.694	225.612	205.953	1.41413	1.12616e-21	4.72988e-18	80.7054	219.753	up
AT1G78490	cytochrome P450, family 708, subfamily A, polypeptide 3	14.5709	15.7645	19.468	11.6037	5.06587	5.21603	-1.22781	0.000104606	0.0126979	16.6011	7.2952	down
AT1G78780	pathogenesis-related family protein	44.9152	33.6075	26.6503	69.987	75.5195	91.9618	1.16041	6.95548e-09	4.10413e-06	35.0577	79.1561	up
AT2G01422		0	0	0	77.5113	94.7404	95.7025	13.2739	7.28357e-29	1.52955e-24	0	89.318	up
AT2G06950	transposable element gene	5.25345	3.73665	4.26067	9.75704	9.30888	11.7336	1.19321	2.71125e-11	2.47549e-08	4.41692	10.2665	up
AT2G07213	other RNA	0.15114	0.0902689	0.0262838	2.48371	2.95464	3.60891	5.09791	1.64614e-17	3.45689e-14	0.0892308	3.01575	up
AT2G07215		0	0.108453	0	3.8682	4.43729	4.19257	6.88408	2.29612e-10	1.85455e-07	0.0361511	4.16602	up
AT2G18780	F-box and associated interaction domains-containing protein	3.78105	4.93992	4.8288	0.868975	0.566145	0.990975	-2.51622	7.67862e-15	1.07501e-11	4.51659	0.808698	down
AT2G19200	unknown protein	0	0	0	0.534845	0.157894	0.715327	6.31459	4.55103e-05	0.00665574	0	0.469355	up
AT2G20720	Pentatricopeptide repeat (PPR) superfamily protein	9.46492	9.72903	6.41334	24.1595	11.8207	28.1961	1.30562	1.10775e-05	0.0021342	8.53576	21.3921	up
AT2G21900	WRKY DNA-binding protein 59	8.11986	3.81136	4.01809	13.1252	9.04637	14.0695	1.17016	0.000546303	0.0398346	5.31644	12.0804	up
AT2G22240	myo-inositol-1-phosphate synthase 2	4.84059	6.93532	5.26563	3.1023	2.29022	2.49799	-1.13986	1.04102e-06	0.000347007	5.68051	2.63017	down
AT2G23170	Auxin-responsive GH3 family protein	61.6335	58.8385	38.4895	20.1406	33.4512	26.5765	-1.0006	1.26724e-05	0.0023141	52.9872	26.7228	down
AT2G23180	cytochrome P450, family 96, subfamily A, polypeptide 1	3.7631	4.14891	4.10046	2.00527	1.50635	1.3395	-1.34019	1.28242e-07	5.17899e-05	4.00415	1.61704	down
AT2G35155	Trypsin family protein	7.85233	5.88882	5.54561	16.8137	12.7342	17.5465	1.26686	4.61188e-11	4.0354e-08	6.42892	15.6982	up
AT2G39330	jacalin-related lectin 23	45.4924	48.028	65.726	22.4439	6.85332	5.90489	-2.2248	0.000426821	0.0330747	53.0821	11.734	down
AT2G41800	Protein of unknown function, DUF642	9.28725	9.77214	11.0292	2.71879	5.4952	4.08982	-1.31698	2.84358e-06	0.000829378	10.0295	4.10127	down
AT2G42730	F-box family protein	1.33621	1.4631	1.14734	0.694665	0.608223	0.543851	-1.11947	0.000299111	0.0259559	1.31555	0.615579	down
AT2G46530	auxin response factor 11	2.65711	3.1378	4.04679	1.52346	1.26523	1.28645	-1.31167	1.30839e-06	0.000410092	3.28057	1.35838	down
AT2G46640		3.3426	3.47993	6.74617	1.99088	1.58689	1.66419	-1.42155	0.000116845	0.0135573	4.5229	1.74732	down
AT3G03341		11.542	17.2723	19.4657	7.62205	6.90353	8.94253	-1.07902	0.000159382	0.0166612	16.0933	7.8227	down
AT3G04040		5.30787	6.43446	5.94048	3.03865	3.2231	2.59269	-1.02653	0.000147773	0.0162257	5.89427	2.95148	down
AT3G04420	NAC domain containing protein 48	1.17971	0.618058	0.485895	3.4641	2.11224	3.89023	2.04248	1.2431e-06	0.000395531	0.76122	3.15553	up
AT3G04717		7.27959	16.1394	13.8103	25.8453	28.855	27.2616	1.10296	0.000694815	0.0468509	12.4098	27.3206	up
AT3G08030	Protein of unknown function, DUF642	16.6477	19.6013	38.2023	14.0146	9.71396	10.2892	-1.18199	0.000276259	0.024687	24.8171	11.3392	down
AT3G10200	S-adenosyl-L-methionine-dependent methyltransferases superfamily protein	0.390123	0.449654	0.607024	0.0833134	0.137734	0.0202595	-2.61783	0.000562911	0.0406225	0.482267	0.0804356	down
AT3G14150	Aldolase-type TIM barrel family protein	5.55725	5.81993	7.82704	3.0535	3.18971	2.59885	-1.15591	5.75061e-06	0.00143765	6.40141	2.94735	down
AT3G14680	cytochrome P450, family 72, subfamily A, polypeptide 14	3.64623	2.6868	2.51166	7.37341	6.28489	8.99425	1.33733	7.03566e-09	4.10413e-06	2.94823	7.55085	up
AT3G16420	PYK10-binding protein 1	9.65634	7.19341	10.0153	3.71327	2.87283	4.11004	-1.36058	2.78322e-08	1.35925e-05	8.95501	3.56538	down
AT3G17950		7.04861	7.64746	9.24199	3.17781	2.71613	2.06068	-1.62592	1.16292e-09	8.14044e-07	7.97935	2.65154	down
AT3G20210	delta vacuolar processing enzyme	0.10854	0.0432173	0.075502	0.48445	0.478456	0.535477	2.69612	0.000139965	0.0156808	0.0757531	0.499461	up
AT3G23450		0.93602	0.704484	2.32255	0.2779	0.175019	0.382941	-2.30431	0.000153639	0.0163581	1.32102	0.27862	down
AT3G25150	Nuclear transport factor 2 (NTF2) family protein with RNA binding (RRM-RBD-RNP motifs) domain	66.977	74.78	49.3647	19.5194	13.9873	15.4486	-1.98655	1.35482e-26	1.42256e-22	63.7072	16.3184	down
AT3G25717	ROTUNDIFOLIA like 16	13.1895	13.9716	24.9608	8.51412	8.11077	4.73234	-1.33391	0.000154234	0.0163581	17.374	7.11907	down
AT3G26960	Pollen Ole e 1 allergen and extensin family protein	5.28989	7.32409	9.07388	3.95136	1.84336	1.18625	-1.68301	0.00012712	0.0145679	7.22929	2.32699	down
AT3G27400	Pectin lyase-like superfamily protein	10.0159	10.831	14.7738	4.78289	5.77491	5.34047	-1.20016	3.35076e-07	0.000130307	11.8736	5.29942	down
AT3G28899		0	0	0.73984	31.0719	32.4109	26.2355	6.76838	6.84162e-18	1.59638e-14	0.246613	29.9061	up
AT3G28955	transposable element gene	0	0	0	0.657773	1.59786	0.319904	6.70323	9.13952e-06	0.00190869	0	0.858512	up
AT3G30122		0.0169777	0.1014	0.0590497	1.06777	0.553163	0.954849	3.82359	8.24433e-09	4.67921e-06	0.0591425	0.858594	up
AT3G33528		0.683192	0.784691	0.731136	8.84941	6.1944	6.8447	3.28408	9.45804e-21	3.31031e-17	0.733006	7.29617	up
AT3G41979	rRNA	62.0208	32.2106	27.2838	23.375	11.9807	7.01449	-1.5371	0.000664892	0.0454812	40.5051	14.1234	down
AT3G42090	transposable element gene	0.35266	0	0	16.8136	11.8282	13.2227	6.8278	1.03101e-07	4.41453e-05	0.117553	13.9548	up
AT3G42100	transposable element gene	0	0	0	0.186112	0.183144	0.120686	6.90197	5.09916e-07	0.000188161	0	0.163314	up
AT3G42110	transposable element gene	0	0	0	1.45325	0.886645	0.912927	7.66476	4.5219e-09	2.9675e-06	0	1.08427	up
AT3G43930	BRCT domain-containing DNA repair protein	0.235106	0.163821	0.204429	1.02551	1.26167	1.0671	2.44873	3.20896e-07	0.000127148	0.201119	1.11809	up
AT3G48360	BTB and TAZ domain protein 2	5.2524	2.72542	4.54276	9.74911	8.88859	9.45529	1.13753	9.91341e-06	0.00198268	4.17353	9.36433	up
AT3G49340	Cysteine proteinases superfamily protein	5.99521	5.69474	6.98467	2.18616	2.59094	2.31977	-1.42683	2.61384e-08	1.30692e-05	6.22488	2.36563	down
AT3G55290	NAD(P)-binding Rossmann-fold superfamily protein	5.07296	7.91127	8.16041	2.91606	1.25585	1.7519	-1.87871	3.79432e-07	0.000144874	7.04821	1.9746	down
AT3G55646		3.57974	4.22904	2.29173	7.06301	7.72785	14.633	1.53004	1.1691e-05	0.0021864	3.36683	9.80794	up
AT3G58120	Basic-leucine zipper (bZIP) transcription factor family protein	0.595028	1.80267	4.94893	0.787295	0.198333	0.382897	-2.50481	0.000577361	0.0411003	2.44887	0.456175	down
AT3G58270	Arabidopsis phospholipase-like protein (PEARLI 4) with TRAF-like domain	5.82608	6.82474	6.80116	3.13456	2.28257	3.27127	-1.19507	8.47121e-07	0.000286928	6.48399	2.89613	down
AT3G60170	transposable element gene	0.0100008	0.0298651	0.00869588	0.375356	0.182089	0.177618	3.90895	2.08562e-05	0.00329308	0.0161873	0.245021	up
AT3G60530	GATA transcription factor 4	11.1513	13.072	20.1579	9.78617	5.4485	7.05774	-1.04009	0.000744378	0.0481885	14.7937	7.4308	down
AT3G61390	RING/U-box superfamily protein	6.8912	5.0973	3.00785	9.64287	9.34442	13.1958	1.0938	0.000150373	0.0162774	4.99878	10.7277	up
AT3G62550	Adenine nucleotide alpha hydrolases-like superfamily protein	118.04	115.594	212.942	83.9657	75.2177	50.6042	-1.13589	8.7341e-05	0.0109176	148.859	69.9292	down
AT4G00130	DNA-binding storekeeper protein-related transcriptional regulator	0	0	0	0.55637	0.367917	0.86588	5.92896	0.000141624	0.015699	0	0.596722	up
AT4G04410	transposable element gene	7.20043	4.94472	3.59529	20.9236	17.1459	18.205	1.8247	1.94239e-16	3.70821e-13	5.24681	18.7582	up
AT4G04810	methionine sulfoxide reductase B4	8.27947	9.03404	11.491	5.89521	3.43302	4.16319	-1.13494	0.000386239	0.0308761	9.60149	4.49714	down
AT4G05030	Copper transport protein family	29.096	23.9154	20.1556	48.9873	42.6911	60.6339	1.0389	8.32755e-07	0.000286928	24.389	50.7708	up
AT4G08780	Peroxidase superfamily protein	6.4495	6.38155	4.26474	10.3816	10.4365	13.9086	1.00678	1.61088e-05	0.00270629	5.6986	11.5756	up
AT4G09875	transposable element gene	0.116146	0.0495492	0	0.87522	0.333904	0.753089	3.59139	1.05621e-05	0.0020745	0.0552318	0.654071	up
AT4G11320	Papain family cysteine protease	1.18079	1.70711	5.7692	0.627414	0.215531	0.305139	-2.9915	5.97958e-06	0.00147731	2.8857	0.382695	down
AT4G12880	early nodulin-like protein 19	14.1103	19.8981	40.167	13.9726	7.72669	4.3646	-1.56877	0.000572648	0.0409882	24.7251	8.68797	down
AT4G13410	Nucleotide-diphospho-sugar transferases superfamily protein	1.17073	1.28934	2.92395	0.581155	0.19096	0.39324	-2.26924	5.31521e-05	0.00749123	1.79467	0.388452	down
AT4G13660	pinoresinol reductase 2	0.400032	0.298651	0.550739	3.65211	3.99317	4.53914	3.24194	6.15091e-18	1.59638e-14	0.416474	4.06147	up
AT4G15620	Uncharacterised protein family (UPF0497)	7.26866	8.58268	9.45855	4.47482	3.12244	4.35261	-1.11853	2.52831e-05	0.00390401	8.43663	3.98329	down
AT4G15680	Thioredoxin superfamily protein	1.12369	0.248567	1.03135	5.1294	3.64922	3.75739	2.34332	5.43533e-06	0.00139197	0.801204	4.17867	up
AT4G16260	Glycosyl hydrolase superfamily protein	10.6618	14.475	16.8412	8.9559	4.27418	7.9276	-1.02951	0.000710296	0.0472032	13.9927	7.05256	down
AT4G16590	cellulose synthase-like A01	3.1412	3.10584	3.50124	0.470478	0.121215	0.104007	-3.85455	3.14556e-16	5.50473e-13	3.24943	0.2319	down
AT4G16920	Disease resistance protein (TIR-NBS-LRR class) family	10.1766	7.06342	3.99131	14.3648	13.7474	19.7783	1.16719	4.8267e-05	0.00694251	7.07711	15.9635	up
AT4G17470	alpha/beta-Hydrolases superfamily protein	47.5008	42.8589	61.4351	21.3331	29.8482	25.4635	-1.01892	2.14992e-06	0.000644977	50.5982	25.5483	down
AT4G18970	GDSL-like Lipase/Acylhydrolase superfamily protein	1.25555	1.2498	3.05237	0.545838	0.0982183	0.202259	-2.78237	1.65415e-05	0.00271384	1.85257	0.282105	down
AT4G23550	WRKY family transcription factor	2.927	2.74222	1.53453	6.50589	4.04236	6.83787	1.25794	0.000201138	0.0193757	2.40125	5.79537	up
AT4G24510	HXXXD-type acyl-transferase family protein	1.77254	4.24485	4.02066	1.40717	0.763138	1.19131	-1.62229	0.000106641	0.0128705	3.34602	1.12054	down
AT4G24780	Pectin lyase-like superfamily protein	23.8806	23.6488	37.4834	15.2589	15.217	11.7328	-1.05082	1.48596e-05	0.0025578	28.3376	14.0696	down
AT4G24790	AAA-type ATPase family protein	0.920775	0.845141	1.13336	0.533731	0.389616	0.365768	-1.20707	0.000377564	0.0303787	0.966426	0.429705	down
AT4G25600	Oxoglutarate/iron-dependent oxygenase	2.03604	2.23283	2.79059	0.94516	0.992089	0.919347	-1.34097	0.000170654	0.0169896	2.35316	0.952199	down
AT4G35320		3.57589	4.67823	7.06255	2.43551	1.61545	1.31051	-1.56328	0.000127643	0.0145679	5.10556	1.78716	down
AT4G35770	Rhodanese/Cell cycle control phosphatase superfamily protein	25.1166	26.1156	29.8039	16.6491	14.2189	7.60647	-1.10917	5.66331e-05	0.00777317	27.0121	12.8248	down
AT4G36240	GATA transcription factor 7	2.17195	4.2799	3.39168	1.52876	1.40172	0.743504	-1.45637	0.000783839	0.0498807	3.28117	1.22466	down
AT4G36410	ubiquitin-conjugating enzyme 17	5.28822	5.96166	5.54	16.4808	13.7986	14.5848	1.38882	2.68159e-11	2.47549e-08	5.59663	14.9547	up
AT4G37390	Auxin-responsive GH3 family protein	10.2819	10.31	8.5466	3.50215	5.33328	5.71474	-1.02108	3.85936e-06	0.0010664	9.71283	4.85006	down
AT4G37970	cinnamyl alcohol dehydrogenase 6	2.5767	2.46626	1.98197	1.10584	0.728103	1.01045	-1.32816	0.00011533	0.0135303	2.34165	0.948128	down
AT4G38620	myb domain protein 4	12.0578	14.8323	11.571	40.1798	39.6337	35.8154	1.56317	3.06106e-25	2.14274e-21	12.8204	38.543	up
AT4G39330	cinnamyl alcohol dehydrogenase 9	3.57311	6.01206	9.90193	2.64241	2.58461	1.79689	-1.52365	6.72972e-05	0.00900154	6.4957	2.3413	down
AT4G39795	Protein of unknown function (DUF581)	0.644971	0.998697	2.80407	0.218085	0.137348	0.0707097	-3.45572	0.000479365	0.0358244	1.48258	0.142048	down
AT5G03270	lysine decarboxylase family protein	0.466124	0.463991	0.709281	0	0	0	-5.73227	0.000279615	0.024881	0.546465	0	down
AT5G06270		0.959046	1.14559	2.03474	0.428054	0.294093	0.378513	-1.96261	0.000588016	0.0414374	1.37979	0.366887	down
AT5G10430	arabinogalactan protein 4	1.33668	2.14937	1.56459	0.417206	0.197065	0	-3.07916	7.19209e-05	0.00938099	1.68355	0.204757	down
AT5G12030	heat shock protein 17.6A	1.21056	1.71239	1.6066	8.27271	3.1749	3.14328	1.64696	0.000727276	0.0480276	1.50985	4.86363	up
AT5G15480	C2H2-type zinc finger family protein	2.26122	1.32404	1.4168	3.74424	3.02728	6.03717	1.33912	0.000250327	0.0232154	1.66736	4.26956	up
AT5G16080	carboxyesterase 17	6.19696	5.0024	3.91394	12.9476	14.8314	16.7008	1.5423	2.0576e-13	2.40053e-10	5.03777	14.8266	up
AT5G18080	SAUR-like auxin-responsive protein family	5.15426	6.1568	15.1098	3.13707	0.846728	2.17957	-2.16549	0.000506305	0.037438	8.80695	2.05446	down
AT5G22460	alpha/beta-Hydrolases superfamily protein	5.89134	7.07262	7.18197	2.46253	1.44686	2.51212	-1.68399	1.15141e-09	8.14044e-07	6.71531	2.1405	down
AT5G24770	vegetative storage protein 2	129.167	146.516	243.636	49.8415	38.6539	43.6928	-2.01946	6.19268e-15	9.28902e-12	173.106	44.0627	down
AT5G24780	vegetative storage protein 1	25.8712	23.0824	61.8625	14.1283	7.43054	9.17371	-1.9081	8.44369e-07	0.000286928	36.9387	10.2442	down
AT5G25451		1.31814	1.78924	1.09405	3.58589	3.33013	3.84267	1.33786	0.000333352	0.0279463	1.40047	3.58623	up
AT5G25980	glucoside glucohydrolase 2	884.989	1051.73	796.089	666.894	376.521	305.125	-1.04785	5.22949e-05	0.00742022	910.937	449.513	down
AT5G28235	Ulp1 protease family protein	0.400383	0.328219	0.266225	0.023891	0.0225695	0	-4.4394	0.000492866	0.0367028	0.331609	0.0154868	down
AT5G38344	Toll-Interleukin-Resistance (TIR) domain family protein	1.87476	1.48603	1.26789	3.34567	2.7281	4.04218	1.10929	0.000376865	0.0303787	1.54289	3.37198	up
AT5G39530	Protein of unknown function (DUF1997)	9.36392	10.7723	16.3817	7.8208	5.58817	4.14939	-1.10193	0.000345068	0.0285293	12.1726	5.85278	down
AT5G40010	AAA-ATPase 1	47.7494	30.1763	17.8747	78.845	60.1207	90.659	1.2541	1.75985e-05	0.00284283	31.9335	76.5416	up
AT5G40230	nodulin MtN21 /EamA-like transporter family protein	9.30426	6.32047	6.23166	21.0765	19.3083	16.7791	1.36704	6.28698e-12	6.60133e-09	7.28546	19.0546	up
AT5G40800		4.36885	3.22499	3.88416	1.54364	0.517445	1.06557	-1.91081	8.88179e-06	0.00190324	3.826	1.04222	down
AT5G41730	Protein kinase family protein	3.25616	2.13586	1.47292	4.39131	4.88791	7.05706	1.24306	6.32728e-05	0.00851749	2.28831	5.44543	up
AT5G44570		128.471	83.9137	72.9093	221.68	201.383	299.542	1.32616	6.44396e-09	3.98009e-06	95.0979	240.869	up
AT5G46295		0.784453	0.976079	0.682096	0	0	0	-5.53842	0.000587797	0.0414374	0.814209	0	down
AT5G50800	Nodulin MtN3 family protein	3.50012	3.73982	4.66285	1.23779	2.2771	1.45746	-1.28985	0.000118073	0.0136238	3.9676	1.65745	down
AT5G52900		17.7209	21.783	26.8418	9.88361	9.15562	8.71143	-1.29527	1.72474e-09	1.16837e-06	22.1153	9.25022	down
AT5G54040	Cysteine/Histidine-rich C1 domain family protein	3.12018	2.1004	1.50292	4.75903	5.16263	6.71102	1.29746	7.40385e-06	0.00161959	2.24116	5.54423	up
AT5G55250	IAA carboxylmethyltransferase 1	1.58813	1.61014	1.68778	0.56683	0.112732	0.319202	-2.33173	1.24498e-05	0.00229338	1.62868	0.332921	down
AT5G58080	response regulator 18	0.888235	0.547343	0.220668	2.57434	1.19571	1.81543	1.75151	0.000432658	0.0332814	0.552082	1.86183	up
AT5G59190	subtilase family protein	0.231719	0.634311	0.201484	1.88043	1.11026	1.60044	2.08848	2.27481e-05	0.003565	0.355838	1.53038	up
AT5G60910	AGAMOUS-like 8	7.72999	8.7014	8.70009	3.33437	3.80762	4.20561	-1.17549	5.64215e-08	2.57576e-05	8.37716	3.78253	down
AT5G62165	AGAMOUS-like 42	0.700147	1.72402	1.40983	0.373803	0.0706254	0.0363594	-3.05096	0.000164068	0.016807	1.278	0.160263	down
AT5G64080	Bifunctional inhibitor/lipid-transfer protein/seed storage 2S albumin superfamily protein	10.7302	11.2408	15.4008	6.3692	4.84944	7.25862	-1.05467	6.88191e-05	0.00914684	12.4573	6.15909	down
AT5G66590	CAP (Cysteine-rich secretory proteins, Antigen 5, and Pathogenesis-related 1 protein) superfamily protein	3.7075	4.38251	10.6786	2.40931	1.33232	2.28635	-1.69842	0.000553848	0.0402307	6.25621	2.00932	down

## Sheet: C2vss2
DEGs between sad2-5 and Col-0 two days after inoculation of Pst DC3000
GeneID	Short_description	NormalizedTPM_Col_2d_rep1	NormalizedTPM_Col_2d_rep2	NormalizedTPM_Col_2d_rep3	NormalizedTPM_sad2_2d_rep1	NormalizedTPM_sad2_2d_rep2	NormalizedTPM_sad2_2d_rep3	Log2Foldchange_Col_2d_VS_sad2_2d	Pvalue_Col_2d_VS_sad2_2d	adjPvalue_Col_2d_VS_sad2_2d	MeanTPMCol_2d	MeanTPMsad2_2d	Significant
AT1G01120	3-ketoacyl-CoA synthase 1	4.72415	6.06777	2.62481	1.551	1.49244	1.17747	-1.65937	1.64681e-06	0.000123574	4.47225	1.40697	down
AT1G01250	Integrase-type DNA-binding superfamily protein	5.16612	8.16733	6.09994	1.34067	1.66388	1.88755	-1.98633	3.22321e-09	5.03007e-07	6.4778	1.6307	down
AT1G01610	glycerol-3-phosphate acyltransferase 4	4.13666	6.31046	3.38051	1.8203	1.98721	1.37999	-1.40941	7.18237e-06	0.000426114	4.60921	1.72917	down
AT1G01700	RHO guanyl-nucleotide exchange factor 2	4.26421	3.50959	2.55808	1.96071	1.78409	1.19901	-1.05771	0.00114276	0.0251383	3.44396	1.64794	down
AT1G02230	NAC domain containing protein 4	4.28457	4.0323	4.99797	9.73661	8.58362	11.7715	1.1737	1.15264e-06	9.15991e-05	4.43828	10.0306	up
AT1G02520	P-glycoprotein 11	2.42532	2.3598	0.711363	6.65765	5.50614	4.05393	1.57481	0.000106781	0.0038845	1.83216	5.40591	up
AT1G02770	Protein of unknown function (DUF626)	2.32955	1.68046	2.43254	0.71123	0.541876	0.534054	-1.85674	5.55769e-06	0.000341973	2.14751	0.59572	down
AT1G03070	Bax inhibitor-1 family protein	2.01902	1.83405	1.09134	0.780801	0.442017	0.270004	-1.72858	0.00158455	0.031982	1.64813	0.497607	down
AT1G03660	Ankyrin-repeat containing protein	7.08318	4.67946	7.42321	16.0422	12.462	15.1828	1.18296	0.000167521	0.00561952	6.39528	14.5623	up
AT1G03770	RING 1B	4.2003	3.99827	3.46677	2.08867	1.91896	1.66638	-1.03771	1.48794e-05	0.00078733	3.88845	1.89134	down
AT1G03940	HXXXD-type acyl-transferase family protein	51.3385	20.8908	25.8838	18.8122	12.4287	11.4585	-1.19604	0.000469913	0.0126724	32.7044	14.2332	down
AT1G04220	3-ketoacyl-CoA synthase 2	6.47881	4.54674	3.36063	2.64642	1.63217	1.64078	-1.2765	0.000104791	0.00383156	4.79539	1.97312	down
AT1G04240	AUX/IAA transcriptional regulator family protein	3.40045	7.85101	5.47412	1.39722	0.88985	1.89815	-2.00067	2.10717e-06	0.000150781	5.57519	1.39507	down
AT1G04600	myosin XI A	1.34186	0.671507	0.536981	0.458745	0.216809	0.289665	-1.395	0.00207756	0.0389742	0.850117	0.32174	down
AT1G05800	alpha/beta-Hydrolases superfamily protein	0.559887	0.13384	0.393862	0	0	0	-6.08965	0.000126278	0.00446556	0.36253	0	down
AT1G07430	highly ABA-induced PP2C gene 2	82.3504	43.6611	52.3523	27.533	22.5849	24.0081	-1.26259	3.28927e-07	2.98893e-05	59.4546	24.7087	down
AT1G07500		8.71617	6.90688	6.04185	2.50258	2.0706	2.89101	-1.531	0.000988071	0.0225184	7.22163	2.48806	down
AT1G07720	3-ketoacyl-CoA synthase 3	18.7873	17.93	14.8224	5.82655	7.01375	5.53665	-1.48254	6.48864e-16	3.48406e-13	17.1799	6.12565	down
AT1G08280	Glycosyltransferase family 29 (sialyltransferase) family protein	1.52939	2.33293	2.5311	1.19817	0.778624	0.871576	-1.17941	0.00220651	0.0407192	2.13114	0.949457	down
AT1G08630	threonine aldolase 1	5.08923	1.98474	4.09556	1.21699	0.793335	1.27209	-1.7677	2.48107e-05	0.00121437	3.72318	1.09414	down
AT1G08890	Major facilitator superfamily protein	14.9966	24.7335	19.7071	7.91287	8.59919	9.32027	-1.20188	2.71395e-07	2.54235e-05	19.8124	8.61077	down
AT1G09000	NPK1-related protein kinase 1	0.919082	0.717998	0.921325	0.362539	0.307854	0.376102	-1.29187	0.00167058	0.033138	0.852802	0.348832	down
AT1G09080	Heat shock protein 70 (Hsp 70) family protein	38.8079	12.0912	20.7559	12.4251	10.4582	9.04935	-1.16131	0.00154358	0.0313313	23.885	10.6442	down
AT1G09310	Protein of unknown function, DUF538	103.103	271.383	105.879	5.87307	13.0666	8.41643	-4.12365	7.5472e-24	1.4776e-20	160.122	9.11871	down
AT1G10060	branched-chain amino acid transaminase 1	3.40667	4.75027	3.9334	2.11727	1.99873	1.90272	-1.00807	3.6325e-05	0.00162302	4.03012	2.00624	down
AT1G10240	FAR1-related sequence 11	4.23627	3.74907	2.96169	7.98335	6.80051	8.00696	1.06445	1.32069e-07	1.38744e-05	3.64901	7.59694	up
AT1G10370	Glutathione S-transferase family protein	12.3618	7.60437	10.7976	35.4345	26.0305	21.0036	1.4189	1.54586e-07	1.55568e-05	10.2546	27.4896	up
AT1G10586	basic helix-loop-helix (bHLH) DNA-binding superfamily protein	8.44268	3.63796	6.96232	2.35951	1.61136	2.16193	-1.6367	4.68339e-05	0.00197768	6.34765	2.04427	down
AT1G10682	other RNA	20.8198	26.1622	20.5083	10.806	11.3808	7.8605	-1.16703	1.32981e-06	0.000103764	22.4967	10.0157	down
AT1G11130	Leucine-rich repeat protein kinase family protein	0.876297	1.83084	1.17125	0.166767	0.597917	0.184989	-2.02107	0.000312728	0.00929126	1.29279	0.316557	down
AT1G11170	Protein of unknown function (DUF707)	9.73615	6.07496	7.17827	3.7776	3.0669	3.61995	-1.13254	2.20795e-06	0.000155393	7.66313	3.48815	down
AT1G11420	DOMAIN OF UNKNOWN FUNCTION 724 2	1.40237	1.21125	1.65162	0.501152	0.598935	0.783977	-1.17877	0.0021992	0.0406191	1.42175	0.628022	down
AT1G11700	Protein of unknown function, DUF584	45.6278	32.8469	41.4943	17.7799	15.2285	19.4235	-1.19346	4.92784e-09	7.28478e-07	39.9897	17.4773	down
AT1G11785		6.76643	5.27971	5.29012	0.720397	0.16143	0.845215	-3.33579	8.7439e-10	1.60948e-07	5.77876	0.575681	down
AT1G12090	extensin-like protein	34.5109	139.584	88.6291	6.11026	21.6866	14.6154	-2.62774	0.000350698	0.0101514	87.5745	14.1374	down
AT1G12260	NAC 007	0.758255	1.33706	0.596161	0.277802	0.186753	0.260747	-1.88866	0.000538642	0.0141122	0.897159	0.241767	down
AT1G12845		2.74325	13.7712	4.52294	1.64863	2.28375	1.68809	-1.89783	0.00131166	0.0276128	7.01247	1.87349	down
AT1G12940	nitrate transporter2.5	0.947249	1.11861	0.969343	2.04033	4.07628	3.46097	1.66375	2.81064e-06	0.000192771	1.01173	3.19252	up
AT1G13250	galacturonosyltransferase-like 3	1.36096	5.81312	3.45907	0.601164	0.969922	0.507833	-2.35581	1.60791e-05	0.000840485	3.54438	0.692973	down
AT1G13300	myb-like transcription factor family protein	0	0	0.0281785	0.245107	0.282469	0.328657	4.69809	0.00250964	0.0447045	0.00939283	0.285411	up
AT1G13480	Protein of unknown function (DUF1262)	1.24556	1.2446	0.520251	4.39604	5.18617	3.51937	2.13838	1.85158e-08	2.38776e-06	1.00347	4.36719	up
AT1G13530	Protein of unknown function (DUF1262)	1.26116	1.08016	0.752522	2.99232	3.48677	3.26502	1.66893	6.93862e-07	5.8144e-05	1.03128	3.24804	up
AT1G13540	Protein of unknown function (DUF1262)	1.29771	1.11837	0.333558	4.14487	2.53872	3.14475	1.85685	0.000115489	0.00416373	0.916545	3.27611	up
AT1G13635	DNA glycosylase superfamily protein	0.184494	1.03348	0.410987	0	0.0572201	0	-4.77735	0.000719284	0.0173078	0.542987	0.0190734	down
AT1G13920	Remorin family protein	5.50723	10.8087	6.71615	1.08493	2.61818	2.42832	-1.89974	3.84887e-06	0.00025118	7.67737	2.04381	down
AT1G14210	Ribonuclease T2 family protein	7.58661	11.3158	7.12002	3.20844	3.66016	3.14835	-1.37278	1.2206e-06	9.62889e-05	8.67414	3.33898	down
AT1G14540	Peroxidase superfamily protein	7.39367	4.53973	5.06124	15.5987	11.5612	13.3737	1.25824	4.01918e-07	3.5826e-05	5.66488	13.5112	up
AT1G14860	nudix hydrolase homolog 18	0.295931	0.336025	0.370817	1.15197	1.44557	1.18937	1.91236	0.000169862	0.00568082	0.334258	1.2623	up
AT1G15010		8.56324	9.40519	6.24301	12.6063	22.0919	17.3693	1.11531	0.000186511	0.00612303	8.07048	17.3558	up
AT1G15260		4.9723	15.2732	6.50889	2.92661	2.9571	3.19645	-1.55467	0.000336484	0.00983245	8.91813	3.02672	down
AT1G15410	aspartate-glutamate racemase family	2.46088	4.50373	2.85687	1.03307	2.02032	1.60433	-1.06941	0.00286833	0.0493477	3.27382	1.55257	down
AT1G17030		9.05454	2.10195	3.84496	1.04434	0.60845	0.906708	-2.54325	6.73676e-07	5.6673e-05	5.00048	0.853165	down
AT1G17190	glutathione S-transferase tau 26	1.96359	3.24309	1.41664	0.416925	0.332182	0.173924	-2.84214	1.35678e-06	0.000105369	2.20777	0.307677	down
AT1G17840	white-brown complex homolog protein 11	7.68751	14.5391	7.05149	1.89187	2.70301	2.67027	-2.00169	3.02011e-10	6.25396e-08	9.75935	2.42171	down
AT1G18710	myb domain protein 47	8.01713	16.0896	10.9336	0.851569	2.77561	1.30793	-2.82001	1.72572e-10	3.91211e-08	11.6801	1.64504	down
AT1G18870	isochorismate synthase 2	8.33626	5.52591	8.11192	2.19844	1.34164	1.93176	-2.01057	2.91781e-12	8.49162e-10	7.32469	1.82395	down
AT1G19250	flavin-dependent monooxygenase 1	812.48	421.74	644.581	320.175	238.171	310.165	-1.11243	1.3782e-05	0.000738665	626.267	289.504	down
AT1G19630	cytochrome P450, family 722, subfamily A, polypeptide 1	2.01196	3.6023	2.3384	0.302683	0.9767	0.994353	-1.79361	0.000273143	0.00832025	2.65089	0.757912	down
AT1G19640	jasmonic acid carboxyl methyltransferase	91.2255	55.0068	75.8777	41.1332	24.7261	31.5209	-1.19151	2.95496e-06	0.000201386	74.0367	32.4601	down
AT1G19960		91.5034	313.307	197.413	61.7605	99.4803	90.5885	-1.25681	0.00137991	0.0286798	200.741	83.9431	down
AT1G20070		21.2752	19.7344	13.9239	45.1802	39.8693	33.3559	1.1131	9.62333e-08	1.05202e-05	18.3112	39.4685	up
AT1G20650	Protein kinase superfamily protein	4.79351	10.9896	6.17812	2.15622	3.16452	2.75777	-1.43806	3.53443e-05	0.00158909	7.3204	2.69284	down
AT1G20823	RING/U-box superfamily protein	4.89205	4.79241	4.04659	2.19059	1.87425	1.91592	-1.19707	3.62793e-05	0.00162302	4.57702	1.99359	down
AT1G20850	xylem cysteine peptidase 2	12.5918	15.5524	8.90874	4.80154	5.31997	5.57087	-1.23068	8.66504e-07	7.09544e-05	12.351	5.23079	down
AT1G21070	Nucleotide-sugar transporter family protein	2.60946	2.23365	3.31171	1.22414	0.793752	1.05121	-1.41974	2.54095e-05	0.00123805	2.71827	1.02303	down
AT1G21090	Cupredoxin superfamily protein	2.28812	2.62698	3.0795	1.12161	0.97577	0.866973	-1.43952	2.04826e-05	0.00103305	2.66487	0.988117	down
AT1G21100	O-methyltransferase family protein	5.51728	8.48997	9.16754	2.4411	2.55272	3.67186	-1.4225	4.59106e-06	0.000293392	7.72493	2.88856	down
AT1G21540	AMP-dependent synthetase and ligase family protein	0.27198	0.782367	0.511208	0.0705821	0.0421769	0	-3.81925	0.000101137	0.00371688	0.521852	0.0375863	down
AT1G22150	sulfate transporter 1;3	0.359892	0.538458	0.123794	1.16471	0.945481	0.990072	1.61759	0.00273461	0.0476863	0.340715	1.03342	up
AT1G22250		2.55051	6.48717	4.98563	0.900166	2.08832	1.88861	-1.52055	0.00171315	0.0338481	4.67444	1.6257	down
AT1G22370	UDP-glucosyl transferase 85A5	10.9532	16.0038	11.4737	2.55672	5.68877	6.43701	-1.37858	9.33817e-05	0.00349144	12.8102	4.89417	down
AT1G22500	RING/U-box superfamily protein	8.52096	9.65545	10.029	17.7511	18.2268	23.1376	1.06734	1.01419e-07	1.10311e-05	9.40179	19.7051	up
AT1G22550	Major facilitator superfamily protein	3.16483	3.46617	3.88131	0.396093	0.542991	0.656076	-2.71762	7.05657e-17	4.34201e-14	3.5041	0.53172	down
AT1G22740	RAB GTPase homolog G3B	2.65882	5.22003	3.68988	0.623221	1.07733	1.12814	-2.02609	2.51643e-06	0.000175385	3.85624	0.942898	down
AT1G23200	Plant invertase/pectin methylesterase inhibitor superfamily	9.81281	4.03907	6.34924	3.59244	1.56926	2.83837	-1.33595	0.000705312	0.0171247	6.73371	2.66669	down
AT1G23730	beta carbonic anhydrase 3	52.2417	36.9522	43.221	21.57	16.3325	25.348	-1.0632	3.65344e-06	0.000240613	44.1383	21.0835	down
AT1G24020	MLP-like protein 423	3.07216	18.7852	2.48977	0.0951954	0.383972	0.536108	-4.55645	1.08024e-08	1.4724e-06	8.11571	0.338425	down
AT1G24070	cellulose synthase-like A10	15.5632	26.2143	10.9748	4.54586	3.82387	2.93205	-2.21768	1.10851e-11	2.87625e-09	17.5841	3.76726	down
AT1G25530	Transmembrane amino acid transporter family protein	8.38082	7.52074	5.72814	2.55718	3.68625	2.84559	-1.24109	7.82524e-07	6.43223e-05	7.2099	3.02968	down
AT1G26208	other RNA	2.05987	4.75376	2.97643	0.982437	0.880594	1.6544	-1.47405	0.000589975	0.0150899	3.26335	1.17248	down
AT1G26210	SOB five-like 1	5.17204	6.78238	3.57339	1.37248	1.55585	1.40189	-1.83296	6.3567e-08	7.3601e-06	5.17594	1.44341	down
AT1G26400	FAD-binding Berberine family protein	3.95136	2.32112	3.14679	7.13695	6.1275	8.36709	1.20334	9.05033e-06	0.000521761	3.13976	7.21051	up
AT1G26450	Carbohydrate-binding X8 domain superfamily protein	6.44932	3.88212	3.66743	1.16956	1.33751	1.66556	-1.73371	1.24779e-06	9.80742e-05	4.66629	1.39087	down
AT1G26810	galactosyltransferase1	0.358679	0.915397	0.599257	0.141838	0.0953512	0.0998481	-2.48445	6.61687e-05	0.0026195	0.624444	0.112346	down
AT1G26945	basic helix-loop-helix (bHLH) DNA-binding superfamily protein	7.69121	7.37168	11.3323	1.63449	2.9301	3.89437	-1.64144	3.01322e-05	0.00139255	8.79838	2.81965	down
AT1G27020		18.1163	23.4076	20.8977	45.69	46.7346	56.2031	1.25241	1.38824e-11	3.55919e-09	20.8072	49.5426	up
AT1G27030		7.84885	12.797	7.95766	1.49718	3.80748	2.8759	-1.79558	1.65927e-06	0.000124076	9.53452	2.72686	down
AT1G27130	glutathione S-transferase tau 13	21.9111	55.0728	43.961	11.8668	17.2314	18.2297	-1.35434	8.36831e-05	0.00320676	40.3149	15.776	down
AT1G28290	arabinogalactan protein 31	0.174344	0.44872	0.33983	0.0301629	0	0.0283112	-4.07707	0.00278143	0.0483461	0.320964	0.0194913	down
AT1G28650	GDSL-like Lipase/Acylhydrolase superfamily protein	4.01694	0.848589	1.95094	0.226267	0.202811	0.51577	-2.83611	1.89535e-05	0.000964973	2.27216	0.314949	down
AT1G29090	Cysteine proteinases superfamily protein	2.19437	1.4799	1.77756	8.31765	4.67123	3.69295	1.60889	1.32569e-05	0.000717336	1.81728	5.56061	up
AT1G29395	COLD REGULATED 314 INNER MEMBRANE 1	165.389	363.633	208.335	48.8951	87.3108	108.353	-1.58388	8.77781e-06	0.000512301	245.785	81.5197	down
AT1G29670	GDSL-like Lipase/Acylhydrolase superfamily protein	5.75861	38.9613	16.5872	1.73125	5.09453	2.85136	-2.65789	0.00152663	0.0310751	20.4357	3.22571	down
AT1G30280	Chaperone DnaJ-domain superfamily protein	3.45617	7.67697	4.19377	2.38305	2.34727	2.58087	-1.06522	0.00182234	0.0354845	5.10897	2.43706	down
AT1G30282	other RNA	3.6836	6.34612	3.7934	1.31854	2.09779	1.88732	-1.37424	7.72047e-05	0.0030121	4.60771	1.76788	down
AT1G30720	FAD-binding Berberine family protein	0.599172	0.217712	0.120127	0.746362	1.13729	2.66206	2.31728	0.000804618	0.019063	0.312337	1.51524	up
AT1G31070	N-acetylglucosamine-1-phosphate uridylyltransferase 1	4.87796	6.96596	4.2768	2.69144	2.9031	1.84113	-1.11355	0.00011298	0.0040894	5.37357	2.47856	down
AT1G31710	Copper amine oxidase family protein	0.453547	1.20165	0.394665	0.0392336	0.210999	0.110475	-2.48216	0.00101014	0.0228273	0.683289	0.120236	down
AT1G32100	pinoresinol reductase 1	8.20483	9.53466	6.45268	3.4912	2.78541	4.68125	-1.13601	7.09729e-05	0.0027994	8.06405	3.65262	down
AT1G32900	UDP-Glycosyltransferase superfamily protein	10.0128	18.191	7.8555	1.7784	1.6826	1.94743	-2.72911	3.21307e-17	2.1624e-14	12.0198	1.80281	down
AT1G33480	RING/U-box superfamily protein	1.57821	1.57349	1.51132	0.359617	0.680491	0.487558	-1.60035	0.000649745	0.0161526	1.55434	0.509222	down
AT1G33940		0.906109	0.576168	1.02186	2.39849	2.61355	2.31746	1.5448	3.2346e-06	0.000216337	0.834713	2.44316	up
AT1G33950	Avirulence induced gene (AIG1) family protein	68.7861	62.7273	76.603	149.239	144.552	145.463	1.07531	1.06675e-12	3.48084e-10	69.3721	146.418	up
AT1G35140	Phosphate-responsive 1 family protein	2.65397	2.41083	2.15546	8.41789	8.40268	7.21875	1.73931	2.63831e-14	1.07205e-11	2.40675	8.01311	up
AT1G35260	MLP-like protein 165	4.67857	7.4127	4.49912	1.24238	1.26544	1.43113	-2.06989	1.91776e-08	2.44384e-06	5.53013	1.31299	down
AT1G35310	MLP-like protein 168	0.527514	0.814616	0.528801	0	0.0490819	0	-5.0712	0.000576384	0.014909	0.623644	0.0163606	down
AT1G36920		0	0.264598	0.0608321	20.4097	13.8221	15.7511	7.23585	2.41364e-24	5.30256e-21	0.108477	16.661	up
AT1G36922		0	0	0.277191	14.725	14.1248	11.073	7.0502	4.31667e-19	4.00307e-16	0.0923971	13.3076	up
AT1G41830	SKU5-similar 6	10.6334	13.5265	8.57936	4.6707	4.67463	3.95146	-1.29558	4.25072e-09	6.44672e-07	10.9131	4.43226	down
AT1G43640	tubby like protein 5	7.19871	3.4955	6.1229	3.15208	1.778	1.83635	-1.31971	0.000272064	0.00829911	5.6057	2.25548	down
AT1G44542	Cyclase family protein	11.7062	4.92784	11.3123	3.51423	3.11198	5.00734	-1.26494	0.00102254	0.0230316	9.31544	3.87785	down
AT1G45010	TRAM, LAG1 and CLN8 (TLC) lipid-sensing domain containing protein	0.877963	3.27407	1.50544	0.1439	0.472937	0.315154	-2.58774	0.000285985	0.00865024	1.88582	0.310664	down
AT1G45191	Glycosyl hydrolase superfamily protein	4.67197	4.69304	0.949889	0.0256599	0.137999	0.144508	-5.02479	3.39528e-12	9.74944e-10	3.4383	0.102722	down
AT1G45201	triacylglycerol lipase-like 1	43.8655	92.358	45.3118	8.65257	17.1127	14.9491	-2.14716	8.35827e-10	1.55176e-07	60.5118	13.5714	down
AT1G46554	other RNA	10.6946	15.6074	11.3504	4.45878	6.23954	5.59431	-1.20386	3.12259e-06	0.00021015	12.5508	5.43088	down
AT1G46768	related to AP2 1	14.2249	10.8814	13.926	4.61117	5.52636	6.90548	-1.19242	3.91796e-06	0.000254916	13.0108	5.681	down
AT1G47670	Transmembrane amino acid transporter family protein	1.21966	4.28253	2.03772	0.511294	0.370998	0.548463	-2.39831	3.45866e-06	0.000229187	2.5133	0.476918	down
AT1G47980		1.27214	0.726376	1.24489	0.150919	0.169093	0.354136	-2.26218	0.000437836	0.0120424	1.08114	0.224716	down
AT1G48300		130.847	252.623	160.235	69.6351	112.1	85.3788	-1.02158	0.000356133	0.0102399	181.235	89.0379	down
AT1G48330		14.3387	11.0954	12.8653	5.43392	5.43534	4.36115	-1.33006	1.72067e-07	1.68438e-05	12.7665	5.0768	down
AT1G48480	receptor-like kinase 1	1.65523	2.67672	2.52233	1.22729	0.880052	0.744334	-1.27562	0.000183269	0.00604423	2.28476	0.950559	down
AT1G48750	Bifunctional inhibitor/lipid-transfer protein/seed storage 2S albumin superfamily protein	7.44017	33.6534	12.3665	2.78674	4.78161	2.46619	-2.40771	6.7361e-06	0.000407314	17.82	3.34485	down
AT1G49430	long-chain acyl-CoA synthetase 2	1.50624	1.84061	0.83884	0.167523	0.633995	0.19218	-2.0542	0.000386746	0.0109592	1.39523	0.331232	down
AT1G50180	NB-ARC domain-containing disease resistance protein	1.55623	1.92905	0.86668	2.84384	3.45402	2.43234	1.01555	0.00216496	0.0400899	1.45065	2.91007	up
AT1G50590	RmlC-like cupins superfamily protein	2.68337	3.8188	2.42839	7.0565	7.53174	7.93052	1.3391	7.59189e-07	6.29489e-05	2.97685	7.50625	up
AT1G51080		2.02635	7.8512	2.90185	1.37368	1.15433	1.0476	-1.83622	0.00053259	0.0140047	4.2598	1.19187	down
AT1G51090	Heavy metal transport/detoxification superfamily protein	64.7928	129.821	83.7563	41.9586	44.1387	37.9516	-1.16576	1.04174e-05	0.000590392	92.7901	41.3496	down
AT1G51300	alpha/beta-Hydrolases superfamily protein	0.326497	0.118634	0.054549	0.88119	1.15439	1.3997	2.83348	0.00116916	0.0255366	0.16656	1.14509	up
AT1G51500	ABC-2 type transporter family protein	12.6854	24.2603	16.0442	2.68169	7.27739	4.46127	-1.87154	5.98312e-07	5.1541e-05	17.6633	4.80678	down
AT1G51800	Leucine-rich repeat protein kinase family protein	28.9198	18.4973	17.2527	56.3818	44.8559	44.3289	1.17566	2.0368e-07	1.98482e-05	21.5566	48.5222	up
AT1G51850	Leucine-rich repeat protein kinase family protein	1.90573	1.68926	0.860186	3.55764	3.36044	2.97986	1.16457	0.000171833	0.00571963	1.48506	3.29931	up
AT1G52000	Mannose-binding lectin superfamily protein	38.1683	102.669	69.998	10.3204	23.7758	13.4355	-2.14806	3.99976e-08	4.86661e-06	70.2785	15.8439	down
AT1G52030	myrosinase-binding protein 2	3.70713	5.53562	2.51704	0.351431	0.504001	0.2309	-3.42552	3.48406e-17	2.27372e-14	3.91993	0.362111	down
AT1G52040	myrosinase-binding protein 1	134.289	318.472	194.564	32.9299	82.9366	47.9345	-1.97818	2.28063e-07	2.2025e-05	215.775	54.6003	down
AT1G52110	Mannose-binding lectin superfamily protein	0.338688	0.205106	0.30179	0.796901	0.777317	0.791977	1.48645	0.00185177	0.0359523	0.281861	0.788732	up
AT1G52400	beta glucosidase 18	133.875	475.136	257.76	14.5967	35.9287	24.4084	-3.52755	5.17732e-16	2.85894e-13	288.924	24.978	down
AT1G52410	TSK-associating protein 1	44.1227	92.0012	51.1422	13.732	22.7941	14.2142	-1.87954	3.48459e-09	5.3603e-07	62.4221	16.9135	down
AT1G52690	Late embryogenesis abundant protein (LEA) family protein	69.7537	20.0511	38.3344	222.599	225.647	87.3466	2.06477	3.01379e-06	0.000204104	42.7131	178.531	up
AT1G52800	2-oxoglutarate (2OG) and Fe(II)-dependent oxygenase superfamily protein	1.76619	4.05108	3.43035	0.825027	0.739501	0.731357	-2.01828	1.31329e-05	0.000714219	3.08254	0.765295	down
AT1G52827	cadmium tolerance 1	2.26911	3.89342	2.738	0.916004	0.234585	0.245648	-2.69901	0.000514374	0.0136591	2.96684	0.465412	down
AT1G53070	Legume lectin family protein	1.68348	3.45902	1.60723	0.124824	0.261063	0.663912	-2.66693	4.10157e-05	0.00178088	2.24991	0.349933	down
AT1G53160	squamosa promoter binding protein-like 4	3.70035	12.0301	5.53153	1.4657	2.03859	1.47059	-2.09137	8.83666e-06	0.000514341	7.08732	1.65829	down
AT1G53470	mechanosensitive channel of small conductance-like 4	2.57044	2.00548	1.89697	8.72498	7.351	4.07163	1.63792	8.02785e-08	8.95792e-06	2.15763	6.71587	up
AT1G53480	mto 1 responding down 1	1.0596	0.962526	0.671497	12.8576	14.0065	14.2399	3.94579	6.52003e-51	1.40415e-46	0.897875	13.7013	up
AT1G53490	RING/U-box superfamily protein	1.07466	0.959372	0.789386	8.40505	9.41288	10.94	3.35836	2.76656e-46	2.97903e-42	0.941138	9.58597	up
AT1G54020	GDSL-like Lipase/Acylhydrolase superfamily protein	8.22388	5.29272	7.27556	3.49661	2.34355	1.86273	-1.43839	4.06874e-06	0.000263136	6.93072	2.56763	down
AT1G54215	proline-rich family protein	0.163633	0.0743208	0.0683467	0.764363	1.218	1.19573	3.41075	0.00117107	0.0255523	0.1021	1.05937	up
AT1G55260	Bifunctional inhibitor/lipid-transfer protein/seed storage 2S albumin superfamily protein	0.82955	7.12106	1.4899	0.0861111	0.810438	0.404124	-2.83774	0.00118152	0.025634	3.14684	0.433557	down
AT1G55990	glycine-rich protein	12.5179	9.83689	6.72238	1.85631	5.82357	2.12954	-1.55019	0.00183806	0.0357582	9.69239	3.26981	down
AT1G56060		22.5858	11.0407	16.8688	33.9756	40.7828	31.7033	1.07971	0.000179393	0.00592548	16.8318	35.4872	up
AT1G56230	Protein of unknown function (DUF1399)	8.9309	9.02889	5.6396	3.2591	3.34505	3.53451	-1.20981	1.40294e-07	1.44783e-05	7.86646	3.37955	down
AT1G56600	galactinol synthase 2	52.0981	76.3774	56.3801	5.61591	9.92844	11.9984	-2.73885	4.75649e-20	5.39135e-17	61.6186	9.18092	down
AT1G56710	Pectin lyase-like superfamily protein	0.82681	2.02787	1.33533	2.2315	4.25677	5.45108	1.51498	0.000744658	0.0178386	1.39667	3.97978	up
AT1G58225		57.6561	46.1647	51.0935	12.5869	13.5496	16.2156	-1.8673	2.30199e-22	3.30504e-19	51.6381	14.1174	down
AT1G58270	TRAF-like family protein	12.4036	26.9149	10.6643	0.636544	2.23036	0.678938	-3.80342	4.88156e-14	1.84438e-11	16.6609	1.18195	down
AT1G60130	Mannose-binding lectin superfamily protein	0.532283	0.273293	0.193327	0.984953	1.14124	1.19507	1.759	0.000356008	0.0102399	0.332967	1.10709	up
AT1G60190	ARM repeat superfamily protein	14.1899	8.5433	9.14302	4.68155	6.22614	4.00118	-1.09001	5.40309e-05	0.00223449	10.6254	4.96962	down
AT1G60690	NAD(P)-linked oxidoreductase superfamily protein	2.09034	5.62347	3.02227	1.25185	1.64571	0.979162	-1.46838	0.00147081	0.0302534	3.57869	1.29224	down
AT1G61110	NAC domain containing protein 25	6.57848	1.59355	5.91414	1.78849	0.670381	0.885128	-2.08753	0.000196643	0.00638749	4.69539	1.11467	down
AT1G61120	terpene synthase 04	260.045	104.938	185.117	108.755	45.3458	56.3474	-1.39064	0.000216826	0.00688726	183.367	70.1495	down
AT1G62480	Vacuolar calcium-binding protein-related	16.4393	10.2697	12.4554	43.2005	35.8256	29.6929	1.47377	7.72167e-10	1.47163e-07	13.0548	36.2397	up
AT1G62540	flavin-monooxygenase glucosinolate S-oxygenase 2	26.4027	24.6809	25.6017	7.21898	12.1157	8.87864	-1.43892	2.02006e-10	4.48494e-08	25.5618	9.40444	down
AT1G62990	KNOTTED-like homeobox of Arabidopsis thaliana 7	5.7259	3.93692	5.8403	2.59424	2.32531	1.26372	-1.33285	0.000104351	0.00382196	5.16771	2.06109	down
AT1G63295	Remorin family protein	5.35525	4.05386	4.5202	1.04231	1.34949	2.39146	-1.53283	0.000171232	0.00570842	4.64311	1.59442	down
AT1G64110	P-loop containing nucleoside triphosphate hydrolases superfamily protein	6.89656	3.99262	2.86246	2.61144	1.03584	1.15513	-1.51461	0.000344944	0.0100117	4.58388	1.6008	down
AT1G64670	alpha/beta-Hydrolases superfamily protein	0.376592	1.27714	0.52432	0	0.0934388	0.0244614	-4.16493	3.75961e-05	0.00166665	0.726016	0.0393001	down
AT1G64710	GroES-like zinc-binding dehydrogenase family protein	29.5619	42.0598	43.8056	6.14301	11.8791	15.5092	-1.78035	1.44509e-07	1.47495e-05	38.4758	11.1771	down
AT1G65060	4-coumarate:CoA ligase 3	4.35109	1.73034	1.34	0.561977	0.466408	0.351652	-2.41378	1.36857e-06	0.00010564	2.47381	0.460012	down
AT1G65480	PEBP (phosphatidylethanolamine-binding protein) family protein	5.12429	11.3046	6.156	15.2485	17.1642	15.6438	1.09188	0.000509968	0.0135767	7.52829	16.0188	up
AT1G65790	receptor kinase 1	33.503	29.8499	21.93	12.522	14.9039	13.6801	-1.04473	7.08183e-08	8.06953e-06	28.4276	13.702	down
AT1G65845		33.5347	42.8644	34.3578	85.3877	99.3223	107.249	1.4016	9.43018e-14	3.50152e-11	36.919	97.3196	up
AT1G65920	Regulator of chromosome condensation (RCC1) family with FYVE zinc finger domain	0.96801	1.41155	0.553283	0.264432	0.201467	0.223378	-2.08143	6.77339e-06	0.000407463	0.977615	0.229759	down
AT1G66370	myb domain protein 113	2.25243	1.22765	0.752643	0.0584533	0.0523938	0	-5.24534	2.4183e-05	0.00119178	1.41091	0.036949	down
AT1G66390	myb domain protein 90	94.117	91.4915	98.9141	22.1841	34.2957	30.7179	-1.70348	2.25708e-16	1.35024e-13	94.8409	29.0659	down
AT1G66830	Leucine-rich repeat protein kinase family protein	8.18427	5.5715	7.97367	4.21798	2.79988	3.54819	-1.04421	4.48869e-05	0.00191153	7.24315	3.52202	down
AT1G67265	ROTUNDIFOLIA like 21	0.905688	1.76296	0.70254	0	0.240768	0.189092	-2.93481	0.00259978	0.0458549	1.12373	0.143287	down
AT1G67590	Remorin family protein	0.578194	2.71365	1.15384	0.266752	0.209212	0.469455	-2.23016	0.00125887	0.0268691	1.4819	0.31514	down
AT1G67635		2.07982	1.65312	2.09937	3.64322	4.47502	4.60164	1.12654	0.000208418	0.00667929	1.9441	4.23996	up
AT1G67710	response regulator 11	1.46694	1.66569	1.20841	0.296091	0.0379139	0.337467	-2.69727	5.12148e-06	0.000319699	1.44701	0.223824	down
AT1G68220	Protein of unknown function (DUF1218)	20.8878	40.6334	25.3504	13.5004	17.2805	11.7597	-1.02854	0.000443897	0.0121471	28.9572	14.1802	down
AT1G68470	Exostosin family protein	2.22324	4.53169	2.85377	1.26649	1.00907	1.63782	-1.29492	0.000679194	0.0166596	3.2029	1.30446	down
AT1G68530	3-ketoacyl-CoA synthase 6	45.1847	80.0245	51.1233	5.89225	12.3292	8.29578	-2.72737	6.04765e-18	4.65151e-15	58.7775	8.83907	down
AT1G68600	Aluminium activated malate transporter family protein	88.4821	151.19	104.626	33.4961	51.2682	47.745	-1.37321	1.3112e-07	1.38421e-05	114.766	44.1698	down
AT1G68740	EXS (ERD1/XPR1/SYG1) family protein	8.47088	9.04455	7.0251	21.2117	16.0768	15.5963	1.10883	3.08165e-09	4.87988e-07	8.18018	17.6283	up
AT1G68760	nudix hydrolase 1	6.39644	7.87396	6.44202	2.29601	2.39173	1.33963	-1.78183	8.86205e-08	9.78733e-06	6.90414	2.00912	down
AT1G68765	Putative membrane lipoprotein	9.57526	4.66724	10.405	2.90914	2.8973	3.10979	-1.47117	0.000216755	0.00688726	8.21584	2.97208	down
AT1G68795	CLAVATA3/ESR-RELATED 12	5.01971	2.8024	3.88754	11.0184	9.34107	7.99851	1.27732	1.40808e-05	0.000750607	3.90322	9.45267	up
AT1G68850	Peroxidase superfamily protein	3.61125	1.31216	0.850166	0.272629	0.366551	0.0959595	-2.95294	3.01231e-05	0.00139255	1.92453	0.245046	down
AT1G69080	Adenine nucleotide alpha hydrolases-like superfamily protein	0.378042	1.20193	0.276328	0	0.0439681	0	-5.21061	0.000811447	0.0191637	0.618765	0.014656	down
AT1G70260	nodulin MtN21 /EamA-like transporter family protein	1.88239	3.39397	2.95437	0.0592124	0.689965	0.917026	-2.29206	0.000628331	0.0157346	2.74358	0.555401	down
AT1G70440	similar to RCD one 3	2.50957	1.70124	1.72094	4.89906	3.90329	5.51066	1.2786	2.63468e-05	0.00126936	1.97725	4.771	up
AT1G70830	MLP-like protein 28	34.2875	80.8895	39.1127	6.03474	11.2836	10.1104	-2.48311	7.15321e-12	1.95002e-09	51.4299	9.14293	down
AT1G70890	MLP-like protein 43	22.5465	74.7878	36.0073	7.83674	12.2452	10.4868	-2.12005	1.40507e-07	1.44783e-05	44.4472	10.1896	down
AT1G71695	Peroxidase superfamily protein	15.6078	32.7559	17.6664	10.582	7.54089	12.5234	-1.10365	0.000706593	0.0171365	22.01	10.2154	down
AT1G72080		5.54557	1.02707	2.56366	0.838333	0.901715	0.367205	-2.10889	0.00175134	0.0343818	3.04543	0.702418	down
AT1G73330	drought-repressed 4	4.7568	5.91297	4.46167	0.476453	0.698829	2.56125	-2.00302	0.000420946	0.011682	5.04381	1.24551	down
AT1G74290	alpha/beta-Hydrolases superfamily protein	6.35616	9.40798	8.46433	2.40633	4.8008	4.22577	-1.07988	0.000998302	0.0226589	8.07616	3.81096	down
AT1G74458		9.01544	15.6543	14.8625	6.12854	5.49324	7.15152	-1.07945	0.000603355	0.0152869	13.1774	6.25777	down
AT1G74460	GDSL-like Lipase/Acylhydrolase superfamily protein	1.29018	0.400189	0.105149	0	0.0585578	0.0613195	-3.84696	0.00212312	0.0395191	0.598506	0.0399591	down
AT1G75600	Histone superfamily protein	0.235742	0	0.0656437	1.63141	0.80426	1.37813	3.71069	0.000578068	0.0149272	0.100462	1.27127	up
AT1G75710	C2H2-like zinc finger protein	0.673842	2.89574	0.801057	0.134515	0.434055	0.328269	-2.26696	0.00138099	0.0286798	1.45688	0.298946	down
AT1G75750	GAST1 protein homolog 1	22.2707	38.6992	22.5237	101.044	118.916	159.937	2.19306	6.9874e-15	3.27132e-12	27.8312	126.633	up
AT1G75900	GDSL-like Lipase/Acylhydrolase superfamily protein	3.9683	7.96272	3.93345	0.368891	1.15728	1.183	-2.53408	1.14177e-07	1.21728e-05	5.28816	0.903055	down
AT1G76640	Calcium-binding EF-hand family protein	15.6474	12.4766	24.7629	8.30183	9.05889	9.14734	-1.00574	0.00196801	0.0374779	17.6289	8.83602	down
AT1G76790	O-methyltransferase family protein	26.8241	40.2654	25.2156	8.68911	12.1841	10.4108	-1.5548	2.46728e-10	5.3017e-08	30.7683	10.428	down
AT1G77060	Phosphoenolpyruvate carboxylase family protein	2.54047	6.60705	4.41888	1.84238	1.71615	1.25457	-1.50043	0.000249877	0.00777652	4.52213	1.60436	down
AT1G78070	Transducin/WD40 repeat-like superfamily protein	51.6707	62.2298	43.1808	22.1262	27.7206	20.8853	-1.14631	5.59355e-09	8.13937e-07	52.3605	23.5774	down
AT1G78490	cytochrome P450, family 708, subfamily A, polypeptide 3	16.4139	22.7212	13.4035	4.47497	6.37054	5.81746	-1.64814	9.5643e-11	2.28469e-08	17.5129	5.55432	down
AT1G78820	D-mannose binding lectin protein with Apple-like carbohydrate-binding domain	1.18513	7.44616	2.16566	0.410072	1.24052	0.481122	-2.32952	0.000522026	0.013774	3.59898	0.710573	down
AT1G78970	lupeol synthase 1	1.73728	2.55369	1.62278	0.75414	0.822912	0.477025	-1.5236	9.80118e-06	0.000561378	1.97125	0.684692	down
AT1G80050	adenine phosphoribosyl transferase 2	4.1926	5.03266	4.96167	1.86519	2.18268	1.99384	-1.23201	4.22848e-05	0.00182129	4.72898	2.0139	down
AT1G80130	Tetratricopeptide repeat (TPR)-like superfamily protein	59.9039	124.71	87.104	10.8678	23.1814	23.979	-2.22164	3.80976e-10	7.74028e-08	90.5725	19.3427	down
AT1G80580	Integrase-type DNA-binding superfamily protein	0.865916	1.17988	0.497308	4.10106	4.53196	3.84929	2.30838	2.42932e-08	3.02271e-06	0.847701	4.16077	up
AT1G80590	WRKY DNA-binding protein 66	3.18252	1.76669	3.64322	6.48485	5.70293	7.06291	1.15833	0.00111504	0.0246293	2.86415	6.4169	up
AT2G01150	RING-H2 finger protein 2B	3.00508	5.63856	4.23878	1.89211	1.83347	1.24796	-1.37798	0.00034809	0.0100895	4.29414	1.65785	down
AT2G01422		0	0.0476775	0.043845	84.7754	92.7865	94.2987	11.4757	1.45047e-28	3.90466e-25	0.0305075	90.6202	up
AT2G01760	response regulator 14	1.18794	2.5359	1.68702	0.524083	0.331591	0.752331	-1.75219	0.000426678	0.0117807	1.80362	0.536002	down
AT2G01913		1.07404	1.9025	1.16638	3.51194	3.94734	3.55795	1.41227	0.000191643	0.00626287	1.38097	3.67241	up
AT2G01950	BRI1-like 2	0.89389	3.13348	1.72321	0.559119	0.874362	0.424302	-1.63036	0.00071894	0.0173078	1.91686	0.619261	down
AT2G02850	plantacyanin	2.6521	4.38997	6.59719	11.7461	14.6412	11.3696	1.45398	5.6549e-05	0.00231089	4.54642	12.5856	up
AT2G03230	GCK domain-containing protein	1.09088	2.06447	0.151881	5.09575	6.59751	4.42863	2.30891	0.000652846	0.0161606	1.10241	5.37396	up
AT2G04190	TRAF-like family protein	22.7624	7.62742	11.4281	7.88603	3.93287	4.86967	-1.32224	0.00116828	0.0255366	13.9393	5.56286	down
AT2G04460	transposable element gene	3.22509	3.21481	1.50204	9.6286	6.7716	5.75619	1.48895	1.32417e-05	0.000717336	2.64731	7.38546	up
AT2G04570	GDSL-like Lipase/Acylhydrolase superfamily protein	2.26134	6.10623	2.69125	0.578805	0.518804	0.784726	-2.54939	1.06083e-07	1.14512e-05	3.68627	0.627445	down
AT2G05380	glycine-rich protein 3 short isoform	55.7735	219.942	136.017	35.9872	53.6322	46.2508	-1.59985	0.000103787	0.00380776	137.244	45.2901	down
AT2G06950	transposable element gene	2.80555	5.84449	3.46166	9.97177	12.5723	7.14768	1.2939	4.44623e-05	0.00189988	4.03723	9.89725	up
AT2G07213	other RNA	0.219612	0	0.0262081	0.846738	1.37197	1.10043	3.82431	1.56218e-05	0.000818566	0.0819401	1.10638	up
AT2G07215		0.169619	0	0	2.46502	3.41944	3.19509	5.86654	1.12333e-09	1.96684e-07	0.0565398	3.02652	up
AT2G09960	transposable element gene	2.03734	0.949074	0.53458	0.42026	0.08506	0.101796	-2.53707	0.000203468	0.00654013	1.17367	0.202372	down
AT2G12400		12.6695	11.7541	8.84867	5.62714	4.46406	3.50089	-1.2894	4.76758e-08	5.67263e-06	11.0908	4.5307	down
AT2G15020		0.478363	3.02202	1.07168	0.293424	0.364163	0.23304	-2.35725	0.000442134	0.0121142	1.52402	0.296876	down
AT2G15050	lipid transfer protein	4.37252	32.5699	16.1239	1.29682	2.73162	1.88668	-3.16225	1.35314e-07	1.41462e-05	17.6888	1.97171	down
AT2G15440	Protein of unknown function (DUF579)	0.205548	0.622391	0.0858542	0	0	0	-5.60918	0.00155479	0.0314995	0.304598	0	down
AT2G15780	Cupredoxin superfamily protein	11.9601	2.8377	12.0414	1.76035	1.49482	3.52197	-1.98615	0.000312786	0.00929126	8.9464	2.25905	down
AT2G16367		5.84801	29.7199	7.26183	0	0	0.153996	-7.9993	4.9386e-09	7.28478e-07	14.2766	0.0513319	down
AT2G16660	Major facilitator superfamily protein	35.6367	46.1314	29.2738	77.5679	88.632	64.8164	1.06118	5.35039e-07	4.64621e-05	37.014	77.0055	up
AT2G16990	Major facilitator superfamily protein	9.8353	9.83498	9.26828	3.95027	4.81246	4.96109	-1.07211	2.73803e-08	3.3695e-06	9.64619	4.57461	down
AT2G17470	Aluminium activated malate transporter family protein	0.495562	0.47267	0.289783	0.0257208	0.115273	0.0482836	-2.7003	0.00188355	0.036413	0.419338	0.0630924	down
AT2G17660	RPM1-interacting protein 4 (RIN4) family protein	0	0.439717	0.323497	2.00993	2.79243	2.4525	3.21563	7.87745e-05	0.00306779	0.254405	2.41828	up
AT2G17740	Cysteine/Histidine-rich C1 domain family protein	7.77509	9.61324	6.71156	17.3973	18.6483	17.3393	1.15184	8.53131e-09	1.21676e-06	8.0333	17.795	up
AT2G18050	histone H1-3	60.4841	93.4923	55.0034	13.6243	15.672	19.1285	-2.10214	2.50684e-16	1.45911e-13	69.6599	16.1416	down
AT2G18193	P-loop containing nucleoside triphosphate hydrolases superfamily protein	3.3686	5.42757	3.65616	8.26971	8.51058	8.21721	1.00674	2.58077e-05	0.00124898	4.15078	8.3325	up
AT2G18210		16.3633	5.32633	17.2385	4.9542	3.93313	4.73863	-1.5211	0.000310646	0.00927888	12.976	4.54199	down
AT2G18480	Major facilitator superfamily protein	0.464142	0.21081	0.794844	0.0481801	0.0647783	0	-3.71621	0.000342749	0.00997491	0.489932	0.0376528	down
AT2G18570	UDP-Glycosyltransferase superfamily protein	2.34695	2.82762	2.62097	1.28223	1.26425	0.746181	-1.24733	0.000120385	0.00428532	2.59851	1.09755	down
AT2G18780	F-box and associated interaction domains-containing protein	4.10825	4.37242	4.17462	1.30483	1.39777	1.46369	-1.60123	1.00625e-09	1.82107e-07	4.21843	1.38876	down
AT2G18890	Protein kinase superfamily protein	2.33925	3.34678	2.10069	1.21412	1.2515	1.16808	-1.09538	0.000864394	0.0202124	2.59557	1.21124	down
AT2G19810	CCCH-type zinc finger family protein	14.1427	29.5678	16.7069	2.29737	5.57496	4.49675	-2.27932	1.81299e-09	3.07437e-07	20.1391	4.12303	down
AT2G20670	Protein of unknown function (DUF506)	4.10587	4.06327	4.43379	8.07371	8.94501	8.94406	1.04217	2.55576e-07	2.43544e-05	4.20098	8.65426	up
AT2G20720	Pentatricopeptide repeat (PPR) superfamily protein	5.24172	5.56651	5.00879	14.3662	21.2101	19.7487	1.81104	7.2922e-18	5.41534e-15	5.27234	18.4417	up
AT2G21590	Glucose-1-phosphate adenylyltransferase family protein	10.0726	7.27335	4.35505	2.24636	2.01349	2.54931	-1.65885	1.47477e-07	1.49815e-05	7.23365	2.26972	down
AT2G21820		3.33351	4.48996	3.93699	1.19322	0.748669	0.447987	-2.31222	6.60957e-05	0.0026195	3.92015	0.796625	down
AT2G22170	Lipase/lipooxygenase, PLAT/LH2 family protein	4.28913	12.843	3.14065	0.274834	0.936107	1.03185	-3.15313	6.52882e-07	5.5139e-05	6.75759	0.747597	down
AT2G22510	hydroxyproline-rich glycoprotein family protein	13.5483	4.24024	1.61682	1.65456	1.27118	0.388245	-2.53325	0.000519645	0.0137483	6.46844	1.10466	down
AT2G22900	Galactosyl transferase GMA12/MNN10 family protein	3.53211	5.36349	3.8534	0.656686	2.30539	1.84911	-1.395	0.00160925	0.0322851	4.24967	1.60373	down
AT2G23180	cytochrome P450, family 96, subfamily A, polypeptide 1	1.97755	2.69457	2.23017	0.641497	1.035	0.650285	-1.56449	1.10189e-05	0.000614773	2.30077	0.775592	down
AT2G23190	cytochrome P450, family 81, subfamily D, polypeptide 7	0.10227	0.278703	0.405808	0	0	0	-5.84954	0.000358213	0.010286	0.262261	0	down
AT2G23540	GDSL-like Lipase/Acylhydrolase superfamily protein	2.02644	1.45032	1.0516	0.0318719	0.628495	0.0598305	-2.62514	0.00257165	0.0454637	1.50946	0.240066	down
AT2G23610	methyl esterase 3	7.28038	17.866	10.5902	5.03825	6.50434	4.65837	-1.14049	0.00106713	0.0238399	11.9122	5.40032	down
AT2G23620	methyl esterase 1	1.99996	1.569	2.46807	3.25562	5.70939	5.04864	1.2138	0.000926192	0.0213103	2.01234	4.67121	up
AT2G24210	terpene synthase 10	20.3703	11.4606	37.0891	6.2754	2.22142	3.79872	-2.50819	3.73701e-08	4.57274e-06	22.9734	4.09851	down
AT2G24440	selenium binding	3.34534	1.80689	3.51212	0.375418	0.588877	0.836882	-2.26174	7.08178e-06	0.000423328	2.88812	0.600392	down
AT2G24762	glutamine dumper 4	9.48326	14.9796	9.99052	6.28926	5.1471	5.54384	-1.02075	0.000140564	0.00485905	11.4845	5.66007	down
AT2G25680	molybdate transporter 1	6.77248	5.21143	4.37171	19.9575	14.9202	17.1508	1.67559	2.78541e-14	1.11086e-11	5.45188	17.3429	up
AT2G25940	alpha-vacuolar processing enzyme	7.83641	1.89518	4.84595	2.03364	1.37304	1.53695	-1.55886	0.000924088	0.0212847	4.85918	1.64788	down
AT2G26010	plant defensin 1.3	0.337183	0.842303	8.80222	0.0875028	0.078432	0.328524	-4.37188	0.000382457	0.0108519	3.32724	0.16482	down
AT2G26250	3-ketoacyl-CoA synthase 10	9.42144	17.4926	10.3237	3.08947	4.4564	3.34149	-1.76937	1.76813e-09	3.02211e-07	12.4126	3.62912	down
AT2G26330	Leucine-rich receptor-like protein kinase family protein	2.77217	6.17671	2.6544	1.24879	1.41133	1.24857	-1.56331	1.37882e-05	0.000738665	3.86776	1.3029	down
AT2G26355	other RNA	63.8998	57.9541	50.5171	20.2968	20.9592	27.005	-1.33009	2.47418e-12	7.50477e-10	57.457	22.7537	down
AT2G26695	Ran BP2/NZF zinc finger-like superfamily protein	3.6367	7.82414	5.54298	20.3986	15.019	14.2976	1.54116	1.78078e-06	0.00013089	5.66794	16.5717	up
AT2G26910	pleiotropic drug resistance 4	4.03127	9.73481	3.96948	2.04498	2.49491	1.50178	-1.54867	3.43057e-05	0.00154886	5.91185	2.01389	down
AT2G27080	Late embryogenesis abundant (LEA) hydroxyproline-rich glycoprotein family	8.88013	5.7307	8.73568	21.2832	16.5887	18.607	1.27145	8.54878e-08	9.49003e-06	7.78217	18.8263	up
AT2G27550	centroradialis	2.55369	0.787835	0.724506	0	0	0	-7.26664	4.02577e-07	3.5826e-05	1.35534	0	down
AT2G27990	BEL1-like homeodomain 8	6.33234	4.51415	3.59078	2.72072	1.89242	2.10424	-1.09815	0.000115616	0.00416373	4.81242	2.23913	down
AT2G28200	C2H2-type zinc finger family protein	46.0863	20.5884	39.402	17.1685	12.3043	19.6955	-1.10925	0.00055307	0.0144261	35.3589	16.3894	down
AT2G28630	3-ketoacyl-CoA synthase 12	0.194882	0.354056	0.434127	0.0449547	0.0402946	0.0632924	-2.7388	0.0023118	0.0421631	0.327688	0.0495139	down
AT2G28710	C2H2-type zinc finger family protein	33.1592	18.14	23.993	75.3035	54.6516	53.9262	1.28889	6.17065e-07	5.27345e-05	25.0974	61.2937	up
AT2G28900	outer plastid envelope protein 16-1	116.309	323.199	135.802	47.769	71.7464	45.1617	-1.79914	1.48022e-06	0.000112643	191.77	54.8924	down
AT2G29130	laccase 2	0.34268	0.732437	0.488332	0.0627738	0	0.03928	-3.97331	1.90887e-05	0.000969561	0.52115	0.0340179	down
AT2G29440	glutathione S-transferase tau 6	10.228	9.24479	15.4305	5.17654	3.693	4.2638	-1.42185	3.22387e-06	0.00021629	11.6344	4.37778	down
AT2G30500	Kinase interacting (KIP1-like) family protein	25.8815	13.1903	12.1494	42.0357	36.2298	30.3327	1.09228	0.000202136	0.00651676	17.0737	36.1994	up
AT2G30540	Thioredoxin superfamily protein	2.02495	3.67888	1.69158	0.509575	0.913502	0.478292	-1.94702	0.000626803	0.0157146	2.46514	0.63379	down
AT2G30660	ATP-dependent caseinolytic (Clp) protease/crotonase family protein	35.1458	10.5967	23.3128	61.5399	48.4532	50.1847	1.21534	0.00082024	0.0193206	23.0185	53.3926	up
AT2G30933	Carbohydrate-binding X8 domain superfamily protein	0.865008	1.53411	0.894646	0.256548	0.191628	0.401331	-1.9522	0.00204037	0.0384776	1.09792	0.283169	down
AT2G32690	glycine-rich protein 23	15.6	34.9316	27.8062	6.74319	13.3677	7.89997	-1.48436	4.86435e-05	0.00203811	26.1126	9.33697	down
AT2G32990	glycosyl hydrolase 9B8	2.66672	6.69726	4.06226	0.279144	1.7723	1.65938	-1.84338	0.00159936	0.0321904	4.47541	1.23694	down
AT2G34490	cytochrome P450, family 710, subfamily A, polypeptide 2	11.8785	15.3268	10.9171	4.53003	5.55867	6.88949	-1.16003	1.31475e-06	0.000102961	12.7075	5.6594	down
AT2G35000	RING/U-box superfamily protein	0.501863	0.325633	0.379312	0.818647	1.06732	1.14094	1.33674	0.00257047	0.0454637	0.402269	1.00897	up
AT2G35140	DCD (Development and Cell Death) domain protein	0.418909	0.530026	0.362441	0.0931816	0.0556814	0.131192	-2.22603	0.000256497	0.00794431	0.437125	0.0933515	down
AT2G35470		12.1042	17.676	14.7619	2.86285	6.32016	4.13017	-1.73734	1.63573e-07	1.62337e-05	14.8474	4.43773	down
AT2G35859		2.76756	6.23132	2.60833	0.810294	1.07844	1.08321	-1.95603	2.1074e-06	0.000150781	3.86907	0.990647	down
AT2G35860	FASCICLIN-like arabinogalactan protein 16 precursor	3.08287	6.53436	2.37569	0.322497	0.756019	0.651967	-2.77565	8.16389e-09	1.17212e-06	3.99764	0.576828	down
AT2G36570	Leucine-rich repeat protein kinase family protein	0.759318	2.38129	1.7519	0.281503	0.571928	0.123303	-2.3274	0.000133268	0.00465919	1.63084	0.325578	down
AT2G36870	xyloglucan endotransglucosylase/hydrolase 32	2.09519	6.03232	1.24595	0.737258	0.991247	0.484398	-2.0704	0.000684205	0.0167634	3.12449	0.737634	down
AT2G37090	Nucleotide-diphospho-sugar transferases superfamily protein	0.30524	1.22001	0.458978	0.0633707	0.142004	0.118961	-2.59907	0.00246706	0.0443124	0.661411	0.108112	down
AT2G37440	DNAse I-like superfamily protein	7.14477	4.41497	5.80011	14.2287	11.6909	9.66725	1.03472	2.67457e-05	0.0012857	5.78662	11.8623	up
AT2G37790	NAD(P)-linked oxidoreductase superfamily protein	1.46164	4.39416	1.68615	0.50575	0.874265	0.576424	-1.93711	0.000397953	0.0111884	2.51399	0.652146	down
AT2G37870	Bifunctional inhibitor/lipid-transfer protein/seed storage 2S albumin superfamily protein	173.022	157.436	134.743	24.6428	31.9805	21.64	-2.56675	2.13736e-38	9.20605e-35	155.067	26.0878	down
AT2G37900	Major facilitator superfamily protein	1.56957	2.23737	0.80687	0.12533	0.157272	0.329379	-2.89485	9.56142e-07	7.77037e-05	1.53793	0.203994	down
AT2G38310	PYR1-like 4	9.54499	13.6056	10.2112	22.3227	29.346	27.4218	1.24851	1.34071e-08	1.78232e-06	11.1206	26.3635	up
AT2G38465		26.079	34.9521	30.4283	13.935	14.0816	16.9117	-1.02497	2.59997e-06	0.000180042	30.4864	14.9761	down
AT2G38530	lipid transfer protein 2	32.696	27.2114	32.0995	2.5859	7.47503	5.1577	-2.58808	1.51166e-13	5.42585e-11	30.669	5.07288	down
AT2G38540	lipid transfer protein 1	120.569	297.162	71.096	20.1232	22.2715	19.6364	-2.96602	1.505e-12	4.76643e-10	162.942	20.677	down
AT2G38750	annexin 4	8.86334	13.863	10.9759	3.04526	6.67874	3.22319	-1.3773	9.25917e-05	0.00347396	11.2341	4.31573	down
AT2G38920	SPX (SYG1/Pho81/XPR1) domain-containing protein / zinc finger (C3HC4-type RING finger) protein-related	6.11507	1.65891	3.58276	1.6372	0.386179	0.997499	-1.91415	0.000892489	0.0206896	3.78558	1.00696	down
AT2G38940	phosphate transporter 1;4	20.6216	21.4455	25.5005	60.3887	49.8784	41.7461	1.16341	3.82756e-09	5.84612e-07	22.5225	50.6711	up
AT2G39030	Acyl-CoA N-acyltransferases (NAT) superfamily protein	925.376	728.13	1045.56	432.961	424.516	444.62	-1.05458	1.14875e-08	1.54621e-06	899.689	434.033	down
AT2G39330	jacalin-related lectin 23	57.2416	86.085	61.4031	18.4599	35.1788	28.0993	-1.31887	1.92178e-06	0.000138884	68.2432	27.246	down
AT2G39850	Subtilisin-like serine endopeptidase family protein	14.7325	17.8294	11.1558	6.31455	4.86403	2.99432	-1.62484	2.3595e-08	2.95431e-06	14.5726	4.7243	down
AT2G40130	Double Clp-N motif-containing P-loop nucleoside triphosphate hydrolases superfamily protein	5.01485	8.05	3.68424	1.75423	2.13486	1.41897	-1.65032	2.72423e-07	2.54235e-05	5.58303	1.76936	down
AT2G40475		1.19903	8.18444	2.28945	0.24893	1.43438	0.333783	-2.51869	0.00133868	0.0279288	3.89097	0.672364	down
AT2G40670	response regulator 16	58.5473	28.5462	38.2336	17.6639	11.7685	14.0386	-1.52548	2.54674e-07	2.43544e-05	41.7757	14.4903	down
AT2G41010	calmodulin (CAM)-binding protein of 25 kDa	3.02172	6.41819	5.90227	8.90264	11.2047	11.4301	1.03443	0.00162801	0.0325351	5.11406	10.5125	up
AT2G41231		0.869299	0.646084	2.70668	0.164068	0.07353	0.153996	-3.46702	0.00101848	0.0229676	1.40736	0.130531	down
AT2G41290	strictosidine synthase-like 2	0.30749	0.614502	0.976093	0.0319189	0.14305	0.0599187	-3.01208	0.000903507	0.0209225	0.632695	0.0782959	down
AT2G41660	Protein of unknown function, DUF617	2.19612	1.63473	2.47157	4.30606	5.78952	5.02242	1.26059	1.11797e-05	0.000622134	2.10081	5.03933	up
AT2G41820	Leucine-rich repeat protein kinase family protein	1.16618	1.61812	1.09195	0.505506	0.512722	0.524417	-1.32565	2.50513e-05	0.00122337	1.29209	0.514215	down
AT2G41905		27.3069	22.513	28.307	65.4854	55.1751	51.7186	1.13809	2.74314e-09	4.44182e-07	26.0423	57.4597	up
AT2G42280	basic helix-loop-helix (bHLH) DNA-binding superfamily protein	19.5584	13.7708	14.6984	40.8115	32.3956	34.9888	1.17416	8.07537e-10	1.52554e-07	16.0092	36.0653	up
AT2G42530	cold regulated 15b	105.881	393.315	213.625	30.2468	67.7187	61.7605	-2.15266	1.00851e-06	8.10421e-05	237.607	53.242	down
AT2G42540	cold-regulated 15a	397.865	1058.79	367.266	186.909	209.906	138.065	-1.76376	2.9899e-06	0.000203125	607.974	178.293	down
AT2G43440	F-box and associated interaction domains-containing protein	0.558835	1.21269	0.466832	0.12891	0.115547	0.120997	-2.60912	0.000510009	0.0135767	0.746119	0.121818	down
AT2G43530	Scorpion toxin-like knottin superfamily protein	208.548	612.208	455.643	111.008	257.508	142.495	-1.32177	0.00116705	0.0255366	425.466	170.337	down
AT2G43800	Actin-binding FH2 (formin homology 2) family protein	3.89407	2.34496	1.55948	1.13546	0.827771	0.69629	-1.54294	5.27574e-05	0.00219341	2.5995	0.886506	down
AT2G44240	Protein of Unknown Function (DUF239)	138.593	94.1485	113.905	492.092	394.83	365.866	1.85303	5.91208e-21	7.48956e-18	115.549	417.596	up
AT2G44370	Cysteine/Histidine-rich C1 domain family protein	0.998769	1.74733	2.194	4.03188	5.40367	4.36102	1.46934	6.34775e-05	0.00253158	1.6467	4.59886	up
AT2G44390	Cysteine/Histidine-rich C1 domain family protein	0.397394	0.481316	0.719267	1.5813	3.08126	2.38766	2.13074	0.000214785	0.00685251	0.532659	2.35007	up
AT2G45245		2.39446	3.63704	2.49211	1.10016	0.840026	0.841398	-1.61813	2.10836e-05	0.00105595	2.8412	0.927196	down
AT2G45470	FASCICLIN-like arabinogalactan protein 8	3.45065	11.7665	5.6099	1.18479	1.82758	1.11206	-2.33275	2.92304e-07	2.69398e-05	6.94236	1.37481	down
AT2G45600	alpha/beta-Hydrolases superfamily protein	7.45877	11.4127	9.29515	3.10972	5.23339	3.69319	-1.2241	2.17528e-05	0.00108442	9.38889	4.0121	down
AT2G46630		12.0425	5.66155	5.85359	3.80139	2.52273	2.26432	-1.45069	8.6424e-05	0.00326531	7.85256	2.86281	down
AT2G46640		8.37073	12.6345	7.23192	2.70918	3.10946	3.75228	-1.55285	7.52444e-08	8.51732e-06	9.4124	3.19031	down
AT2G46730		0.421108	0.948006	0.474138	0.0950283	0.204426	0.107033	-2.16896	0.000670233	0.0164585	0.614418	0.135496	down
AT2G46940		4.89722	2.49665	3.46481	0.311238	1.39487	1.21721	-1.87554	0.000696853	0.0169575	3.61956	0.974439	down
AT2G47180	galactinol synthase 1	22.9726	39.8897	27.6539	9.68569	16.0739	13.0215	-1.21871	1.38231e-05	0.000738694	30.1721	12.9271	down
AT2G47670	Plant invertase/pectin methylesterase inhibitor superfamily protein	3.6306	4.27345	3.75907	1.59242	1.23703	1.7936	-1.33617	8.28534e-05	0.00318063	3.88771	1.54102	down
AT2G47780	Rubber elongation factor protein (REF)	5.11782	6.4499	3.50494	1.29224	1.75887	2.11136	-1.53266	2.87143e-05	0.00135003	5.02422	1.72082	down
AT2G48090		22.7424	16.1452	23.0427	7.67086	5.03821	7.94476	-1.58759	9.99868e-09	1.38924e-06	20.6435	6.88461	down
AT3G02110	serine carboxypeptidase-like 25	0.760043	2.64658	1.29099	0.105195	0.235724	0.543052	-2.39685	0.000452704	0.0122944	1.56587	0.294657	down
AT3G02480	Late embryogenesis abundant protein (LEA) family protein	88.6569	17.4745	46.5016	277.923	269.259	131.924	2.15584	0.00173637	0.0341222	50.8777	226.369	up
AT3G02620	Plant stearoyl-acyl-carrier-protein desaturase family protein	0.313261	0.796773	0.575713	0.16259	0.029147	0	-3.18075	0.00249829	0.044576	0.561916	0.0639122	down
AT3G03170		3.4772	3.73293	2.59666	1.14847	1.37256	1.33463	-1.33763	0.000300121	0.00901452	3.26893	1.28522	down
AT3G03640	beta glucosidase 25	14.7607	18.1599	12.8294	42.2726	39.5794	27.367	1.25631	1.33568e-08	1.78232e-06	15.25	36.4063	up
AT3G04140	Ankyrin repeat family protein	0.732041	1.61257	1.48294	0.417941	0.391644	0.588425	-1.45895	0.0012682	0.0269683	1.27585	0.466003	down
AT3G04420	NAC domain containing protein 48	0.708864	0.643923	0.968992	4.51535	4.40703	4.01839	2.46788	7.96868e-15	3.57528e-12	0.773926	4.31359	up
AT3G05660	receptor like protein 33	15.1246	22.8568	11.2486	7.40165	7.33608	6.84038	-1.18313	4.68814e-06	0.000297878	16.41	7.1927	down
AT3G05936		9.74349	12.7012	9.88682	3.65711	5.7365	6.11431	-1.05299	0.000259432	0.0080045	10.7772	5.16931	down
AT3G06035	Glycoprotein membrane precursor GPI-anchored	5.97615	13.6686	5.52717	0.996995	2.3334	2.75538	-2.03268	3.13864e-05	0.00144431	8.39063	2.02859	down
AT3G07970	Pectin lyase-like superfamily protein	3.20043	1.81016	2.92575	0.940244	0.67422	1.05903	-1.57151	5.51209e-05	0.00226111	2.64545	0.891163	down
AT3G08770	lipid transfer protein 6	4.145	4.76933	1.55817	0.573694	0	0.403856	-3.42737	1.86589e-05	0.000952223	3.49083	0.32585	down
AT3G10080	RmlC-like cupins superfamily protein	0.739337	3.77777	2.43187	0.527633	0.515931	0.405198	-2.27019	0.000531968	0.0140047	2.31633	0.482921	down
AT3G11340	UDP-Glycosyltransferase superfamily protein	8.78302	7.11171	10.9938	22.2541	21.2787	25.5631	1.35716	2.25678e-09	3.71008e-07	8.96285	23.0319	up
AT3G13175		0.27864	1.32884	0.640108	0	0.0648144	0	-4.93935	0.00186706	0.0361446	0.749197	0.0216048	down
AT3G13610	2-oxoglutarate (2OG) and Fe(II)-dependent oxygenase superfamily protein	120.837	79.9473	105.857	241.119	221.367	224.367	1.16354	5.87717e-10	1.1829e-07	102.214	228.951	up
AT3G13980		0.715309	1.1139	0.426818	0	0	0.0331876	-5.96402	1.80146e-05	0.000928141	0.75201	0.0110625	down
AT3G14150	Aldolase-type TIM barrel family protein	3.3345	6.33091	3.63876	1.87101	1.84476	0.936612	-1.51705	0.000105669	0.00385059	4.43473	1.55079	down
AT3G14395		1.64218	0.542449	0.748268	3.0219	3.61152	2.47274	1.65323	0.00231411	0.0421631	0.977633	3.03539	up
AT3G14980	Acyl-CoA N-acyltransferase with RING/FYVE/PHD-type zinc finger protein	1.52488	2.42165	1.08677	0.708431	0.932645	0.706498	-1.09056	0.00193345	0.0370452	1.67777	0.782525	down
AT3G15270	squamosa promoter binding protein-like 5	2.32588	2.32408	1.86525	0.96575	0.605946	0.770493	-1.47731	0.000502703	0.013432	2.17174	0.78073	down
AT3G15750	Essential protein Yae1, N-terminal	13.9088	12.7185	12.6226	8.0584	5.37428	6.21303	-1.00088	6.64477e-06	0.000404242	13.0833	6.54857	down
AT3G16360	HPT phosphotransmitter 4	4.74163	2.95353	2.71611	0	0	0	-8.14179	2.22796e-10	4.84659e-08	3.47042	0	down
AT3G16400	nitrile specifier protein 1	41.6835	68.8573	58.6318	16.0175	26.6203	18.9388	-1.45784	5.62696e-08	6.58599e-06	56.3908	20.5255	down
AT3G16420	PYK10-binding protein 1	8.05705	10.3833	8.26276	2.0059	2.01128	1.88276	-2.17722	3.9142e-20	4.68313e-17	8.90105	1.96665	down
AT3G16470	Mannose-binding lectin superfamily protein	137.988	228.231	188.944	46.5767	77.9401	56.6564	-1.61476	1.06839e-09	1.90016e-07	185.054	60.3911	down
AT3G16660	Pollen Ole e 1 allergen and extensin family protein	2.88917	13.8795	9.23636	19.4365	26.4167	29.2325	1.52717	0.000987716	0.0225184	8.66834	25.0286	up
AT3G16800	Protein phosphatase 2C family protein	9.57173	9.42141	9.64409	3.45958	3.47306	2.20809	-1.64984	2.04765e-12	6.29976e-10	9.54574	3.04691	down
AT3G16920	chitinase-like protein 2	2.55051	4.41746	2.49992	0.988418	1.04416	1.62354	-1.36539	0.000592216	0.0151292	3.15596	1.21871	down
AT3G17070	Peroxidase family protein	28.8171	36.3091	25.2643	8.95888	17.6255	18.2074	-1.00299	0.000811541	0.0191637	30.1302	14.9306	down
AT3G17120		1.75925	8.10291	5.11261	0.823067	2.25934	0.603546	-2.02379	0.000745575	0.0178408	4.99159	1.22865	down
AT3G17520	Late embryogenesis abundant protein (LEA) family protein	4.58913	0.805715	1.35304	19.215	18.3713	5.4482	2.68473	8.44635e-06	0.000495642	2.24929	14.3449	up
AT3G17950		6.38668	9.66929	8.79504	2.29025	3.34936	3.16791	-1.49539	2.92716e-07	2.69398e-05	8.28367	2.93584	down
AT3G18850	lysophosphatidyl acyltransferase 5	0.746892	1.71878	0.935893	0.516872	0.208481	0.194056	-1.90061	0.00129974	0.0274963	1.13385	0.30647	down
AT3G19620	Glycosyl hydrolase family protein	2.84579	4.89548	2.71901	1.49549	1.4894	1.43834	-1.23777	4.78062e-05	0.00201478	3.48676	1.47441	down
AT3G20110	cytochrome P450, family 705, subfamily A, polypeptide 20	0.134457	0.101782	0.0187201	0.628075	0.604667	0.720521	2.97974	2.62895e-05	0.00126936	0.0849862	0.651088	up
AT3G20340		4.92121	2.14074	5.21115	14.5339	6.38465	9.99487	1.32277	0.00241736	0.0435651	4.09103	10.3045	up
AT3G20470	glycine-rich protein 5	1.58655	6.77365	1.81132	0.219589	0.0492064	0.412216	-3.8964	1.73949e-06	0.000129178	3.39051	0.227004	down
AT3G20640	basic helix-loop-helix (bHLH) DNA-binding superfamily protein	1.7061	3.29886	2.05639	0.885506	0.884421	0.854891	-1.42711	0.000112983	0.0040894	2.35378	0.874939	down
AT3G20820	Leucine-rich repeat (LRR) family protein	4.10844	16.2402	8.39245	2.26565	4.50954	2.40802	-1.64368	0.000658004	0.0162509	9.58038	3.06107	down
AT3G21080	ABC transporter-related	26.2472	32.9409	31.3843	80.4636	93.8549	89.564	1.54225	1.88665e-19	1.9348e-16	30.1908	87.9608	up
AT3G21510	histidine-containing phosphotransmitter 1	16.9247	7.73543	12.849	5.19325	3.86257	4.5633	-1.46141	1.08567e-05	0.000607297	12.503	4.53971	down
AT3G21550	DUF679 domain membrane protein 2	10.3322	11.1455	10.457	4.43452	4.29835	7.0662	-1.01159	0.000236175	0.00743113	10.6449	5.26636	down
AT3G21600	Senescence/dehydration-associated protein-related	7.56215	5.64753	3.7953	2.14087	2.25267	2.65014	-1.25832	4.85924e-05	0.00203811	5.66833	2.34789	down
AT3G22142	Bifunctional inhibitor/lipid-transfer protein/seed storage 2S albumin superfamily protein	0.0657404	0.793391	0.494256	0.0974879	0.0611674	0.0457515	-2.74391	0.000948702	0.0217123	0.451129	0.0681356	down
AT3G22840	Chlorophyll A-B binding family protein	37.4782	17.6655	19.0845	10.7305	9.5742	10.2557	-1.27151	2.91214e-05	0.00135934	24.7427	10.1868	down
AT3G22900	RNA polymerase Rpb7-like, N-terminal domain	2.40278	2.34236	1.61555	6.02258	3.54431	4.16826	1.11406	0.00225165	0.0413045	2.12023	4.57838	up
AT3G22910	ATPase E1-E2 type family protein / haloacid dehalogenase-like hydrolase family protein	63.177	22.5262	28.8191	134.693	85.6438	78.6606	1.38966	0.000137297	0.00476907	38.1741	99.6657	up
AT3G23090	TPX2 (targeting protein for Xklp2) protein family	1.00877	1.91601	0.970372	0.126927	0.455078	0.23827	-2.22894	0.000295027	0.00889875	1.29838	0.273425	down
AT3G23450		0.118473	1.20534	0.356288	0.0983848	0	0	-4.14394	0.00171764	0.0339058	0.560034	0.0327949	down
AT3G24255	RNA-directed DNA polymerase (reverse transcriptase)-related family protein	0.691182	0.764351	0.941397	0.187168	0.181746	0.0292797	-2.60177	1.07243e-05	0.000603026	0.798977	0.132731	down
AT3G24518		8.86437	8.95141	6.21065	1.30147	3.04942	2.67889	-1.75927	1.62242e-07	1.61761e-05	8.00881	2.34326	down
AT3G24520	heat shock transcription factor C1	8.41784	10.5691	7.43612	1.8581	1.86804	2.3568	-2.1135	1.45414e-18	1.20447e-15	8.80767	2.02765	down
AT3G24660	transmembrane kinase-like 1	2.12106	3.43823	2.90219	0.531459	1.02078	0.730433	-1.88632	1.14128e-07	1.21728e-05	2.82049	0.760892	down
AT3G25150	Nuclear transport factor 2 (NTF2) family protein with RNA binding (RRM-RBD-RNP motifs) domain	40.9557	39.2438	39.4737	11.7485	11.7803	12.3359	-1.73719	4.39033e-40	3.15167e-36	39.891	11.9549	down
AT3G25573		4.60833	3.12058	5.17952	2.17439	1.71511	1.30618	-1.32228	0.00256028	0.0454467	4.30281	1.73189	down
AT3G26300	cytochrome P450, family 71, subfamily B, polypeptide 34	5.91331	16.1147	8.81276	3.25647	4.33959	5.16638	-1.26801	0.000830595	0.0194925	10.2803	4.25415	down
AT3G26460	Polyketide cyclase/dehydrase and lipid transport superfamily protein	1.02953	2.2005	1.51771	0.12573	0.338088	0.413039	-2.42523	0.00063987	0.0159864	1.58258	0.292286	down
AT3G26960	Pollen Ole e 1 allergen and extensin family protein	2.59542	8.34242	5.12845	1.4507	1.95048	1.02123	-1.86356	0.000149835	0.00510578	5.35543	1.47414	down
AT3G27250		25.8021	23.087	18.324	4.70724	5.59299	5.85676	-2.04811	5.06425e-23	7.85953e-20	22.4044	5.38566	down
AT3G27416		1.36604	1.46651	0.726183	2.96494	3.46641	2.72242	1.37761	0.0015285	0.0310839	1.18624	3.05126	up
AT3G27809		23.0886	17.941	24.5547	12.6092	9.05889	11.1123	-1.00542	6.23212e-05	0.0024947	21.8614	10.9268	down
AT3G28007	Nodulin MtN3 family protein	32.5539	19.7515	20.9688	5.05825	6.47699	10.8519	-1.69858	3.01821e-07	2.76597e-05	24.4248	7.46239	down
AT3G28130	nodulin MtN21 /EamA-like transporter family protein	2.0751	6.03707	3.09214	1.19346	0.939286	1.01091	-1.83499	2.78391e-05	0.00132349	3.73477	1.04788	down
AT3G28220	TRAF-like family protein	9.97137	51.8388	24.3485	0.41403	4.1393	2.60071	-3.57989	0.000423361	0.0117041	28.7195	2.38468	down
AT3G28270	Protein of unknown function (DUF677)	9.99694	16.1288	12.1999	1.66939	2.93201	2.24449	-2.4804	9.05064e-18	6.49715e-15	12.7752	2.28196	down
AT3G28290	Protein of unknown function (DUF677)	0.794787	2.59911	1.15083	0.192506	0.271151	0.0516252	-3.13811	6.33831e-06	0.00038779	1.51491	0.171761	down
AT3G28300	Protein of unknown function (DUF677)	0.423887	1.13109	0.354101	0.0275009	0.0739501	0	-4.2062	8.48141e-05	0.00323284	0.63636	0.033817	down
AT3G28345	ABC transporter family protein	0.557638	0.204569	0.385208	0.0111318	0.13969	0.073139	-2.33353	0.00251938	0.0448409	0.382471	0.0746536	down
AT3G28899		0.220774	0.401097	0	22.2299	23.2121	32.0506	7.00692	1.06077e-14	4.47936e-12	0.20729	25.8309	up
AT3G29030	expansin A5	0.971887	5.91508	1.70495	0.26903	0.934424	0.157822	-2.64631	0.000714034	0.017278	2.86397	0.453759	down
AT3G29590	HXXXD-type acyl-transferase family protein	21.2341	10.3042	8.77875	2.40633	2.30067	1.92734	-2.59226	1.59022e-13	5.61426e-11	13.439	2.21145	down
AT3G29633		13.4741	13.819	9.80348	0.451186	0	0.846976	-4.84856	1.7697e-06	0.000130522	12.3655	0.432721	down
AT3G29781	transposable element gene	0	0	0	0.627401	0.437393	0.239916	6.84861	1.7456e-06	0.000129186	0	0.434903	up
AT3G30775	Methylenetetrahydrofolate reductase family protein	17.6431	9.42512	16.9801	28.667	28.9202	35.7963	1.08387	5.82672e-05	0.0023721	14.6828	31.1278	up
AT3G33528		0.0545442	0.495472	0.227822	3.90674	4.16151	3.72005	3.9027	6.86176e-12	1.89455e-09	0.25928	3.92943	up
AT3G42090	transposable element gene	0	0	0	13.6781	18.7308	13.5516	7.96519	6.46039e-10	1.26696e-07	0	15.3202	up
AT3G42100	transposable element gene	0	0	0	0.148251	0.140265	0.14688	6.76923	1.21043e-06	9.58373e-05	0	0.145132	up
AT3G42110	transposable element gene	0.154886	0.196975	0.0776321	1.25408	0.605271	0.69418	2.58006	0.000185796	0.00611821	0.143164	0.851176	up
AT3G44735	PHYTOSULFOKINE 3 PRECURSOR	5.22554	11.194	5.6683	2.91458	3.48326	2.43169	-1.31917	0.00132169	0.0277258	7.3626	2.94318	down
AT3G44990	xyloglucan endo-transglycosylase-related 8	0.32778	3.27525	0.383343	0.20415	0.182987	0	-3.36281	0.00232945	0.0424065	1.32879	0.129046	down
AT3G45060	high affinity nitrate transporter 2.6	4.16126	2.4374	1.63362	7.03408	6.38953	4.69691	1.15053	0.000922316	0.0212666	2.74409	6.04017	up
AT3G45160	Putative membrane lipoprotein	13.0727	34.5206	33.079	4.33928	3.32372	6.51662	-2.51449	2.44347e-09	3.98655e-07	26.8908	4.72654	down
AT3G45410	Concanavalin A-like lectin protein kinase family protein	5.20839	4.17567	4.72998	9.87106	10.7936	10.1877	1.13026	1.53833e-10	3.5623e-08	4.70468	10.2841	up
AT3G45638	other RNA	0.950486	0.99292	1.42921	0.19733	0.353748	0.277823	-2.02467	0.00167441	0.0331538	1.1242	0.2763	down
AT3G45970	expansin-like A1	16.7918	10.5394	17.2346	39.3723	40.7473	24.9108	1.23153	1.00742e-05	0.000573963	14.8553	35.0102	up
AT3G46770	AP2/B3-like transcriptional factor family protein	0.616212	0.639724	0.735376	0	0.0409534	0	-5.42812	0.000120031	0.00427979	0.66377	0.0136511	down
AT3G48130		0	0	0	1.22356	1.31606	2.98595	5.54894	0.00110563	0.0244464	0	1.84186	up
AT3G48280	cytochrome P450, family 71, subfamily A, polypeptide 25	0.961553	1.74692	0.760973	0.315201	0.235439	0.295851	-2.03108	0.000137658	0.00477393	1.15648	0.282164	down
AT3G48350	Cysteine proteinases superfamily protein	3.62285	5.83133	3.55736	1.22057	0.916633	1.36239	-1.89256	4.46367e-08	5.34054e-06	4.33718	1.16653	down
AT3G48720	HXXXD-type acyl-transferase family protein	0.375913	4.66681	2.57501	0.442244	0.48967	0.293008	-2.64409	0.000277458	0.008416	2.53924	0.408307	down
AT3G49330	Plant invertase/pectin methylesterase inhibitor superfamily protein	0.743785	0.405386	0.932	0	0	0	-5.70101	0.000413433	0.0115035	0.693724	0	down
AT3G49580	response to low sulfur 1	90.2453	75.8807	83.7644	32.1497	27.4626	33.7214	-1.4202	5.6241e-17	3.56237e-14	83.2968	31.1112	down
AT3G50240	ATP binding microtubule motor family protein	0.963486	1.36893	0.75327	0.346203	0.390767	0.156457	-1.78433	6.05503e-05	0.00244655	1.02856	0.297809	down
AT3G50840	Phototropic-responsive NPH3 family protein	12.1173	12.8535	10.6938	4.05751	4.50975	6.9694	-1.19163	2.23258e-06	0.000156615	11.8882	5.17888	down
AT3G50940	P-loop containing nucleoside triphosphate hydrolases superfamily protein	1.1046	0.92815	0.576717	0.114663	0.359718	0.0807177	-2.20906	0.00147783	0.0303689	0.869823	0.185033	down
AT3G50970	dehydrin family protein	195.17	174.61	146.372	86.2937	87.0791	57.4289	-1.15895	2.16009e-08	2.72045e-06	172.051	76.9339	down
AT3G51238	other RNA	38.9029	13.9358	13.7549	3.81266	3.46392	2.0936	-2.81929	8.32368e-12	2.21307e-09	22.1979	3.12339	down
AT3G51240	flavanone 3-hydroxylase	44.4657	13.3467	15.8104	5.19882	3.57859	1.24013	-2.87355	0.00011661	0.00419252	24.5409	3.33918	down
AT3G51480	glutamate receptor 3.6	1.90006	0.862994	0.710085	0.428208	0.290772	0.474996	-1.52631	0.00100388	0.0227334	1.15771	0.397992	down
AT3G51600	lipid transfer protein 5	42.5586	177.169	89.0424	20.6202	38.8238	30.0046	-1.78368	5.42757e-05	0.00223924	102.923	29.8162	down
AT3G52370	FASCICLIN-like arabinogalactan protein 15 precursor	1.35357	3.45223	1.56562	0.51339	0.557048	0.380426	-2.13185	1.34576e-05	0.000724559	2.12381	0.483621	down
AT3G52742	other RNA	0.630688	0.779155	0.632227	1.67599	1.5492	1.40104	1.17883	0.000748863	0.0178996	0.68069	1.54208	up
AT3G52748	other RNA	5.55075	7.56334	6.23585	19.1734	15.761	11.6556	1.26263	1.62946e-05	0.000849687	6.44998	15.53	up
AT3G52780	Purple acid phosphatases superfamily protein	23.5343	6.53863	18.8142	8.0265	2.43303	2.21903	-1.96067	0.000271634	0.00829773	16.2957	4.22619	down
AT3G52900	Family of unknown function (DUF662)	3.64953	3.70196	2.64221	1.32594	1.69783	1.42233	-1.15858	0.00238309	0.0432006	3.33123	1.48203	down
AT3G53065	D-galactoside/L-rhamnose binding SUEL lectin protein	0.727256	1.23868	1.89852	4.71829	5.66709	3.36576	1.80898	0.000379496	0.0107946	1.28815	4.58371	up
AT3G53480	pleiotropic drug resistance 9	0.758661	0.489883	0.442868	3.99456	2.53439	3.20608	2.53304	2.39986e-18	1.9142e-15	0.563804	3.24501	up
AT3G53980	Bifunctional inhibitor/lipid-transfer protein/seed storage 2S albumin superfamily protein	58.0786	97.8964	35.9166	5.04841	9.24689	4.60114	-3.33162	1.51463e-17	1.05223e-14	63.9638	6.29881	down
AT3G54260	TRICHOME BIREFRINGENCE-LIKE 36	0.804363	1.06556	1.0359	0.104371	0.218287	0.326545	-2.15392	0.000548399	0.0143329	0.968611	0.216401	down
AT3G54720	Peptidase M28 family protein	3.13222	3.9268	2.69306	1.06478	1.05666	0.928029	-1.6736	3.78363e-10	7.74028e-08	3.2507	1.01649	down
AT3G54990	Integrase-type DNA-binding superfamily protein	0.68141	0.655394	0.401807	3.74472	2.49875	3.47577	2.49403	1.07643e-09	1.90016e-07	0.579537	3.23975	up
AT3G55240	Plant protein 1589 of unknown function	5.88213	12.078	13.4104	1.27207	3.02153	3.34313	-2.03893	8.97089e-06	0.000519347	10.4568	2.54558	down
AT3G55646		2.24555	5.7115	1.22783	13.8164	11.8903	11.2576	2.01978	1.34092e-05	0.000723763	3.06163	12.3214	up
AT3G55940	Phosphoinositide-specific phospholipase C family protein	4.08942	6.99759	3.37644	0.937851	1.26094	1.32041	-2.0287	9.92505e-09	1.38796e-06	4.82115	1.17307	down
AT3G55990	Plant protein of unknown function (DUF828)	0.896858	1.79233	0.955237	0.0698236	0.166894	0.524297	-2.24238	0.00112058	0.0247263	1.21481	0.253672	down
AT3G56090	ferritin 3	29.9885	26.84	33.3814	70.8148	63.4054	51.2308	1.03491	4.27963e-08	5.14895e-06	30.07	61.817	up
AT3G56275		27.6226	19.7784	16.1796	0.809605	0.967572	1.0132	-4.49772	1.60574e-38	8.64529e-35	21.1935	0.930127	down
AT3G56370	Leucine-rich repeat protein kinase family protein	1.52687	2.68521	1.34693	0.938299	0.806935	0.761683	-1.14556	0.000689898	0.0168263	1.853	0.835639	down
AT3G56891	Heavy metal transport/detoxification superfamily protein	3.66459	2.95058	2.57425	8.0403	11.3139	8.03359	1.58537	9.98355e-07	8.05265e-05	3.06314	9.12927	up
AT3G57030	Calcium-dependent phosphotriesterase superfamily protein	5.59311	12.2044	7.14441	2.15034	3.71717	2.39316	-1.58973	1.28233e-05	0.000700922	8.31398	2.75356	down
AT3G57260	beta-1,3-glucanase 2	2530.94	2007.41	2457.47	1402.27	1100.06	986.685	-1.007	6.88151e-08	7.88299e-06	2331.94	1163.01	down
AT3G57310	Bifunctional inhibitor/lipid-transfer protein/seed storage 2S albumin superfamily protein	12.8389	8.86848	11.2838	2.63771	4.2308	4.56064	-1.52119	5.03803e-05	0.0021027	10.997	3.80971	down
AT3G57680	Peptidase S41 family protein	32.1239	17.494	19.0819	13.2718	8.88468	11.4667	-1.02599	0.000193154	0.00630268	22.8999	11.2077	down
AT3G57780		2.10777	1.89772	0.810261	0.677687	0.485949	0.399824	-1.61331	0.000379935	0.0107946	1.60525	0.521153	down
AT3G58810	metal tolerance protein A2	7.35986	3.58422	5.5846	2.2283	2.47285	2.64924	-1.16467	0.000129721	0.00456483	5.50956	2.45013	down
AT3G60530	GATA transcription factor 4	6.81479	16.358	8.84141	1.62032	4.14451	1.89178	-2.05704	4.05857e-06	0.000263136	10.6714	2.55221	down
AT3G61185		9.39682	7.11328	9.34499	27.8695	31.2256	31.3903	1.80773	8.92585e-15	3.84454e-12	8.61836	30.1618	up
AT3G61198	other RNA	20.0582	26.63	30.0934	54.5254	63.9157	70.6557	1.29682	1.48288e-08	1.95922e-06	25.5939	63.0323	up
AT3G62090	phytochrome interacting factor 3-like 2	8.13721	8.2527	5.69682	2.49565	4.08672	3.22085	-1.16121	1.45268e-05	0.000770566	7.36224	3.26774	down
AT3G62550	Adenine nucleotide alpha hydrolases-like superfamily protein	142.591	245.329	205.341	52.0527	60.3277	94.8103	-1.51509	2.53192e-07	2.43426e-05	197.753	69.0636	down
AT3G62690	AtL5	7.2112	6.83049	6.15271	2.36723	2.46591	2.52216	-1.45292	1.73192e-11	4.33704e-09	6.73147	2.45177	down
AT3G62700	multidrug resistance-associated protein 10	21.4263	29.3328	17.2547	8.52607	11.1409	9.01565	-1.23886	6.32507e-08	7.3601e-06	22.6713	9.56087	down
AT3G63200	PATATIN-like protein 9	0.713949	1.77748	0.353428	0.109794	0.0984127	0.309162	-2.43904	0.00209487	0.0391254	0.948286	0.172456	down
AT4G00130	DNA-binding storekeeper protein-related transcriptional regulator	0	0	0	1.06364	1.8538	0.6101	6.94494	1.43297e-06	0.000109824	0	1.17585	up
AT4G00360	cytochrome P450, family 86, subfamily A, polypeptide 2	17.1098	32.8982	19.4965	7.9167	10.644	8.69508	-1.34656	1.36017e-06	0.000105369	23.1681	9.08527	down
AT4G01060	CAPRICE-like MYB3	2.36964	3.4628	4.47544	0.320844	0.191723	0.602294	-3.22079	5.47796e-06	0.000339004	3.43596	0.37162	down
AT4G01080	TRICHOME BIREFRINGENCE-LIKE 26	7.88135	24.1597	10.7235	3.14662	7.06334	2.8764	-1.70281	0.000238188	0.00745583	14.2548	4.36212	down
AT4G01130	GDSL-like Lipase/Acylhydrolase superfamily protein	3.84136	5.66634	3.6211	1.35356	1.14766	1.06444	-1.87996	1.05641e-08	1.4491e-06	4.37627	1.18856	down
AT4G01390	TRAF-like family protein	4.43602	14.9432	9.41867	1.439	1.59079	2.83638	-2.29316	1.46647e-06	0.000111992	9.59929	1.95539	down
AT4G01440	nodulin MtN21 /EamA-like transporter family protein	7.26433	8.47289	7.47625	3.04645	3.46062	4.27499	-1.10276	1.63919e-06	0.000123432	7.73782	3.59402	down
AT4G01985		15.3578	2.7661	5.19811	3.29836	1.25238	0.902963	-2.09452	0.000533639	0.0140152	7.77399	1.8179	down
AT4G03210	xyloglucan endotransglucosylase/hydrolase 9	0.988055	2.31288	0.825389	0.118344	0.282869	0.333236	-2.47051	0.000323604	0.00949475	1.37544	0.244817	down
AT4G04223	other RNA	40.0542	39.9749	52.9519	17.7516	20.8616	17.9948	-1.23629	9.76555e-09	1.38308e-06	44.327	18.8693	down
AT4G04410	transposable element gene	6.08857	3.35415	2.73178	39.848	22.5962	25.8051	2.86492	2.78523e-19	2.72648e-16	4.05816	29.4164	up
AT4G04750	Major facilitator superfamily protein	12.6401	9.43805	5.24476	1.18234	2.71405	1.65109	-2.28136	9.82596e-09	1.38308e-06	9.10765	1.84916	down
AT4G05540	P-loop containing nucleoside triphosphate hydrolases superfamily protein	1.24977	1.11697	0.774596	3.61995	2.68203	2.1604	1.43494	8.03809e-06	0.000472974	1.04711	2.8208	up
AT4G06534		0.650904	1.83605	0.915778	0.213369	0.414376	0.100135	-2.21857	0.00185304	0.0359523	1.13425	0.242627	down
AT4G06536	SPla/RYanodine receptor (SPRY) domain-containing protein	0.981796	2.08098	1.29859	0.169858	0.304501	0	-3.19344	0.00108217	0.0240497	1.45379	0.15812	down
AT4G08160	glycosyl hydrolase family 10 protein / carbohydrate-binding domain-containing protein	1.81634	1.79993	1.00694	0.599915	0.675998	0.740056	-1.18416	0.000813345	0.0191853	1.54107	0.67199	down
AT4G08570	Heavy metal transport/detoxification superfamily protein	0.764919	1.70236	0.0319494	0	0	0	-6.89409	7.4359e-05	0.00291693	0.833077	0	down
AT4G08685	Pollen Ole e 1 allergen and extensin family protein	4.77695	13.9067	5.48093	1.91179	2.08845	1.06544	-2.25152	4.83996e-06	0.000306569	8.05486	1.68856	down
AT4G08780	Peroxidase superfamily protein	2.68556	2.11183	4.92214	8.77928	6.15363	7.61546	1.19746	0.00122883	0.0264113	3.23984	7.51612	up
AT4G08950	Phosphate-responsive 1 family protein	5.47064	5.21638	7.03948	11.8866	14.1954	10.9252	1.05663	5.067e-06	0.000317218	5.90883	12.3357	up
AT4G08991		12.6048	8.68625	8.07879	4.62466	5.66181	2.85854	-1.1529	0.00208299	0.0390081	9.78996	4.38167	down
AT4G09600	GAST1 protein homolog 3	1.79024	0.750567	2.58838	0.42885	0.128131	0.134174	-2.92626	0.000584343	0.0150172	1.70973	0.230385	down
AT4G09780	TRAF-like family protein	0.519954	0.413279	0.135735	0	0	0	-5.90654	0.000246059	0.00767989	0.356323	0	down
AT4G09820	basic helix-loop-helix (bHLH) DNA-binding superfamily protein	6.62431	2.15056	2.56719	1.58321	1.01666	0.975893	-1.65718	0.0003283	0.0096194	3.78069	1.19192	down
AT4G09875	transposable element gene	0.55107	0.344152	0.129472	1.91275	1.4581	1.05706	2.13294	2.81081e-05	0.00133334	0.341565	1.47597	up
AT4G10500	2-oxoglutarate (2OG) and Fe(II)-dependent oxygenase superfamily protein	428.526	147.963	245.135	161.53	103.118	125.654	-1.07047	0.00196998	0.0374783	273.875	130.101	down
AT4G11320	Papain family cysteine protease	1.98419	5.51325	2.92505	0.212026	0.488691	0.0568599	-3.77414	3.04169e-09	4.85228e-07	3.47416	0.252526	down
AT4G11500		0.407882	0.370514	0.340731	1.39722	1.78369	0.794816	1.83197	0.00118943	0.0257443	0.373043	1.32524	up
AT4G11911		0.203048	0.276669	0.678478	0	0	0	-5.42202	0.00184218	0.0358061	0.386065	0	down
AT4G12410	SAUR-like auxin-responsive protein family	37.1923	31.5167	40.6754	21.0089	15.7741	16.6461	-1.03885	5.71106e-07	4.93949e-05	36.4615	17.8097	down
AT4G12470	azelaic acid induced 1	9.03461	19.0704	11.997	52.8007	52.1376	47.5748	1.92661	2.85303e-12	8.45126e-10	13.3673	50.8377	up
AT4G12480	Bifunctional inhibitor/lipid-transfer protein/seed storage 2S albumin superfamily protein	155.535	239.48	199.851	572.752	595.547	417.188	1.41125	2.72922e-10	5.7624e-08	198.289	528.496	up
AT4G12490	Bifunctional inhibitor/lipid-transfer protein/seed storage 2S albumin superfamily protein	499.177	710.138	680.018	1906.09	2020.02	1499.31	1.51777	2.05375e-13	7.13381e-11	629.778	1808.48	up
AT4G12500	Bifunctional inhibitor/lipid-transfer protein/seed storage 2S albumin superfamily protein	39.7419	71.6661	57.572	178.378	197.063	177.251	1.70776	3.91161e-13	1.33715e-10	56.3267	184.231	up
AT4G12880	early nodulin-like protein 19	12.146	37.9564	13.5932	2.05108	3.8932	4.52979	-2.5912	5.21492e-08	6.13708e-06	21.2319	3.49135	down
AT4G13410	Nucleotide-diphospho-sugar transferases superfamily protein	0.646319	3.734	3.45544	0.0805091	0.769741	0.428211	-2.61457	0.000650933	0.0161526	2.61192	0.426154	down
AT4G13420	high affinity K+ transporter 5	0.190894	0.028901	0.0531556	0.710064	0.547648	0.294488	2.53467	0.000838106	0.0196403	0.0909837	0.5174	up
AT4G13570	histone H2A 4	6.65203	8.38973	5.05171	3.48109	3.22253	3.26738	-1.00528	0.000651469	0.0161526	6.69782	3.32367	down
AT4G13660	pinoresinol reductase 2	1.66075	1.5086	1.21392	10.2	9.14259	10.5851	2.77943	8.92143e-31	2.74474e-27	1.46109	9.97588	up
AT4G13840	HXXXD-type acyl-transferase family protein	11.0542	31.1401	19.4239	5.75057	9.836	7.13069	-1.43799	0.00011132	0.00404282	20.5394	7.57242	down
AT4G14090	UDP-Glycosyltransferase superfamily protein	114.14	49.2195	54.1465	21.1313	20.3542	14.1601	-1.9596	1.37644e-09	2.39057e-07	72.5019	18.5485	down
AT4G14100	transferases, transferring glycosyl groups	32.2698	32.1768	24.0561	12.8112	15.1617	12.4932	-1.12256	1.04377e-08	1.44094e-06	29.5009	13.4887	down
AT4G14440	3-hydroxyacyl-CoA dehydratase 1	5.5001	12.9977	4.45642	0.643913	2.7319	1.20877	-2.30687	3.79662e-05	0.00167207	7.6514	1.52819	down
AT4G14480	Protein kinase superfamily protein	3.5057	5.82535	3.73806	2.51481	2.20108	1.58287	-1.05461	0.0010097	0.0228273	4.35637	2.09959	down
AT4G14740	Plant protein of unknown function (DUF828) with plant pleckstrin homology-like region	2.00697	7.12283	4.1719	0.847867	1.21596	1.70532	-1.81541	0.00014391	0.00493509	4.4339	1.25638	down
AT4G15200	formin 3	0.371924	0.289586	0.162744	1.52591	1.69731	0.621211	2.23474	2.12057e-05	0.00105959	0.274751	1.28148	up
AT4G15210	beta-amylase 5	28.6011	81.5325	55.3087	218.988	338.615	141.745	2.07584	1.39122e-07	1.4474e-05	55.1474	233.116	up
AT4G15236	ABC-2 and Plant PDR ABC-type transporter family protein	0.0100135	0.0363846	0.0334599	0.259863	0.177022	0.185371	2.9312	0.000203425	0.00654013	0.0266193	0.207419	up
AT4G15620	Uncharacterised protein family (UPF0497)	16.0766	15.549	16.0811	1.18816	2.2268	2.73736	-2.94575	2.30623e-21	3.10419e-18	15.9022	2.05077	down
AT4G15910	drought-induced 21	42.2283	31.7478	34.4375	16.4788	17.4561	12.4716	-1.22266	7.53178e-09	1.08862e-06	36.1379	15.4688	down
AT4G16730	terpene synthase 02	22.5517	7.61778	14.0677	6.65825	2.0034	3.20204	-1.90322	4.05862e-05	0.00176936	14.7457	3.95456	down
AT4G16740	terpene synthase 03	510.108	168.126	271.692	185.212	67.9526	92.4408	-1.45907	0.000570655	0.014789	316.642	115.202	down
AT4G16750	Integrase-type DNA-binding superfamily protein	15.4927	22.7512	14.0171	5.44635	6.8621	4.67796	-1.61658	3.34845e-09	5.18793e-07	17.4203	5.66214	down
AT4G16770	2-oxoglutarate (2OG) and Fe(II)-dependent oxygenase superfamily protein	19.2998	23.7673	19.8753	10.3715	8.8616	9.97987	-1.10747	6.28869e-10	1.25401e-07	20.9808	9.73764	down
AT4G17030	expansin-like B1	95.3636	50.3532	65.8867	22.2712	26.9955	34.7035	-1.32563	1.81567e-06	0.000132669	70.5345	27.9901	down
AT4G17770	trehalose phosphatase/synthase 5	12.5644	14.6051	6.39574	5.53487	5.5081	3.54331	-1.19384	0.000158626	0.00536289	11.1884	4.86209	down
AT4G18440	L-Aspartase-like family protein	18.1774	59.4708	33.5824	14.542	22.0108	12.7282	-1.17463	0.00275047	0.0478466	37.0769	16.427	down
AT4G18640	Leucine-rich repeat protein kinase family protein	0.379198	0.609426	0.38987	0.0151394	0.12213	0.08526	-2.60667	0.000219297	0.00695549	0.459498	0.0741765	down
AT4G18770	myb domain protein 98	0.200929	0.324483	0.2611	0.0231749	0.041545	0.0217522	-3.17689	0.002805	0.0487166	0.262171	0.028824	down
AT4G18780	cellulose synthase family protein	1.0653	1.03766	0.868471	0.479637	0.382148	0.175075	-1.5222	0.000256744	0.00794431	0.990476	0.34562	down
AT4G19230	cytochrome P450, family 707, subfamily A, polypeptide 1	17.8618	9.57565	11.0948	40.2309	23.7419	23.0887	1.17686	8.53469e-05	0.00324168	12.8441	29.0205	up
AT4G20970	basic helix-loop-helix (bHLH) DNA-binding superfamily protein	2.98565	7.21029	5.47489	18.0664	17.2099	16.0349	1.70414	2.64802e-07	2.50122e-05	5.22361	17.1037	up
AT4G21620	glycine-rich protein	27.4932	36.5775	26.4221	7.00852	12.6772	11.912	-1.50983	7.7228e-08	8.66241e-06	30.1643	10.5326	down
AT4G21650	Subtilase family protein	17.3646	27.538	11.6189	0.195348	2.40361	0.86677	-4.00988	2.09692e-05	0.00105266	18.8405	1.15524	down
AT4G21680	NITRATE TRANSPORTER 1.8	26.1519	10.8801	15.9016	53.1433	40.6872	33.2854	1.26582	5.94189e-05	0.00240988	17.6445	42.372	up
AT4G21926		5.46716	9.98966	7.03435	2.80497	3.97593	3.24504	-1.16316	0.000718364	0.0173078	7.49706	3.34198	down
AT4G21960	Peroxidase superfamily protein	579.949	1453.35	807.744	325.484	456.02	421.762	-1.23545	0.000118152	0.00423379	947.013	401.089	down
AT4G22270	Protein of unknown function (DUF3537)	7.23019	5.75839	5.67832	3.67336	2.86619	2.38125	-1.06553	1.28214e-05	0.000700922	6.2223	2.9736	down
AT4G22470	protease inhibitor/seed storage/lipid transfer protein (LTP) family protein	43.2788	12.0589	21.0411	75.2813	45.8988	62.6646	1.27375	0.00133964	0.0279288	25.4596	61.2816	up
AT4G22880	leucoanthocyanidin dioxygenase	133.445	55.001	64.4726	15.1616	9.42026	6.75963	-3.01014	6.63291e-16	3.48406e-13	84.3061	10.4472	down
AT4G22960	Protein of unknown function (DUF544)	1.05049	0.665755	1.22448	0.253594	0.363689	0.380841	-1.55868	0.00193642	0.0370692	0.98024	0.332708	down
AT4G23020		0.491507	1.40993	0.648298	0	0.240693	0	-3.37611	0.00256635	0.0454513	0.849912	0.0802311	down
AT4G23210	cysteine-rich RLK (RECEPTOR-like protein kinase) 13	13.8965	16.4121	13.2891	40.9576	46.3619	39.6659	1.54457	5.10928e-23	7.85953e-20	14.5325	42.3285	up
AT4G23300	cysteine-rich RLK (RECEPTOR-like protein kinase) 22	5.34232	9.00764	6.49846	12.103	15.7842	13.789	1.00095	4.13188e-05	0.00179043	6.94948	13.8921	up
AT4G23550	WRKY family transcription factor	4.02074	2.4755	2.76167	7.88369	8.56286	7.57381	1.38331	2.90048e-07	2.69244e-05	3.08597	8.00678	up
AT4G23560	glycosyl hydrolase 9B15	3.91472	0.397444	1.80824	0.478078	0.0857038	0.269237	-2.8807	0.000264189	0.00811638	2.04014	0.277673	down
AT4G23670	Polyketide cyclase/dehydrase and lipid transport superfamily protein	242.2	591.85	304.468	49.154	88.6841	68.4737	-2.45808	1.3213e-12	4.24708e-10	379.506	68.7706	down
AT4G23870		1.22126	6.00911	3.48568	0.105644	0.520807	1.1899	-2.54881	0.00109759	0.0243186	3.57202	0.605449	down
AT4G23880		29.4888	23.3102	29.3175	11.0243	9.63072	10.7152	-1.38986	1.55335e-12	4.84826e-10	27.3722	10.4568	down
AT4G23990	cellulose synthase like G3	20.5062	15.5808	16.0483	5.03289	6.38052	7.40943	-1.46285	1.46456e-11	3.71067e-09	17.3784	6.27428	down
AT4G24010	cellulose synthase like G1	3.38929	4.16264	2.48461	0.646208	0.933188	0.96035	-1.97069	2.4864e-10	5.3017e-08	3.34552	0.846582	down
AT4G24510	HXXXD-type acyl-transferase family protein	2.21296	5.06189	2.04909	0.110706	0.347306	0.129888	-3.96604	9.66906e-12	2.53943e-09	3.10798	0.195967	down
AT4G24780	Pectin lyase-like superfamily protein	23.4822	32.7972	32.1886	7.40023	18.5441	14.1906	-1.13761	0.00059387	0.0151535	29.4894	13.3783	down
AT4G25434	nudix hydrolase homolog 10	15.2297	8.57596	12.7873	6.81569	5.24158	5.2238	-1.08419	8.47679e-05	0.00323284	12.1977	5.76036	down
AT4G25830	Uncharacterised protein family (UPF0497)	0.434649	1.18449	0.108928	0	0.0404415	0	-5.22018	0.00141808	0.0293915	0.576022	0.0134805	down
AT4G25835	P-loop containing nucleoside triphosphate hydrolases superfamily protein	2.21366	2.61628	2.06794	10.2046	8.50448	7.67641	1.93514	4.49978e-19	4.00307e-16	2.2993	8.79516	up
AT4G25960	P-glycoprotein 2	1.24449	3.63434	1.70117	0.330966	0.813415	0.521087	-1.97326	2.88862e-05	0.00135237	2.19333	0.555156	down
AT4G26150	cytokinin-responsive gata factor 1	1.66393	3.16832	2.0048	0.763972	0.863413	0.966487	-1.39533	0.000560427	0.0145765	2.27902	0.864624	down
AT4G26460	S-adenosyl-L-methionine-dependent methyltransferases superfamily protein	0.103028	0	0.0860662	0.855583	0.76689	2.50956	4.46493	0.001174	0.0255608	0.0630314	1.37734	up
AT4G27300	S-locus lectin protein kinase family protein	8.09641	12.5571	7.30455	4.37032	4.31376	4.01898	-1.13402	3.7236e-06	0.000243743	9.31936	4.23435	down
AT4G27435	Protein of unknown function (DUF1218)	11.2698	6.81081	11.593	4.25404	3.11977	4.71886	-1.29837	3.77146e-05	0.00166781	9.89121	4.03089	down
AT4G27560	UDP-Glycosyltransferase superfamily protein	57.043	85.0461	56.0061	31.3452	38.598	28.0256	-1.01279	6.41287e-06	0.00039124	66.0317	32.6563	down
AT4G28330		2.77713	2.96418	2.20392	0.720697	0.51679	0.676453	-2.05258	4.09924e-05	0.00178088	2.64841	0.63798	down
AT4G28556	PAK-box/P21-Rho-binding family protein	1.54652	1.5129	1.5652	3.17985	3.34831	2.86873	1.02224	0.000147683	0.0050484	1.54154	3.1323	up
AT4G28940	Phosphorylase superfamily protein	38.3109	11.5613	25.14	7.65937	4.13721	5.9648	-2.07842	2.57249e-07	2.44058e-05	25.0041	5.92046	down
AT4G29190	Zinc finger C-x8-C-x5-C-x3-H type family protein	102.137	152.591	118.042	46.2095	66.644	70.3532	-1.02068	1.82657e-05	0.000934373	124.257	61.0689	down
AT4G29400	Protein of unknown function (DUF3531)	5.33149	11.435	6.46413	2.8056	3.68602	3.35483	-1.23399	0.000320133	0.00943144	7.74354	3.28215	down
AT4G30230		16.3277	6.83738	10.3829	32.7358	19.6813	17.7512	1.06424	0.00230775	0.0421631	11.1827	23.3894	up
AT4G30280	xyloglucan endotransglucosylase/hydrolase 18	0.796304	1.41054	1.39693	3.88502	2.40797	2.75429	1.31357	0.00093803	0.0215597	1.20126	3.01576	up
AT4G30430	tetraspanin9	0.371231	0.303499	0.124046	1.81117	1.62342	0.506377	2.31839	0.000915614	0.0211347	0.266258	1.31365	up
AT4G30460	glycine-rich protein	110.476	86.8145	132.142	45.2612	46.7018	48.3116	-1.23544	2.22305e-09	3.68274e-07	109.811	46.7582	down
AT4G30650	Low temperature and salt responsive protein family	168.429	492.747	242.785	98.2284	151.919	113.268	-1.31043	0.000319477	0.00942502	301.321	121.139	down
AT4G31330	Protein of unknown function, DUF599	5.99471	8.66983	7.14927	2.57918	2.97233	4.419	-1.12596	0.000255721	0.00793545	7.27127	3.32351	down
AT4G31590	Cellulose-synthase-like C5	2.76435	5.078	2.47603	1.61012	1.67184	1.33172	-1.15656	0.000407851	0.0114071	3.43946	1.53789	down
AT4G31650	Transcriptional factor B3 family protein	9.26313	11.7905	5.71539	3.33184	4.19151	3.8954	-1.21771	3.78799e-05	0.00167169	8.92302	3.80625	down
AT4G32000	Protein kinase superfamily protein	1.36905	2.6765	1.86466	0.648782	0.747677	0.463964	-1.66929	0.000135135	0.00470918	1.97007	0.620141	down
AT4G32295		1.57821	1.64342	3.18342	0.279702	0.859568	0.562567	-1.91508	0.00066287	0.0163336	2.13502	0.567279	down
AT4G32650	potassium channel in Arabidopsis thaliana 3	0.702719	0.828117	0.745685	2.24751	1.9085	2.92374	1.63738	1.68367e-07	1.65569e-05	0.758841	2.35992	up
AT4G32810	carotenoid cleavage dioxygenase 8	98.2088	38.6733	66.2262	42.1554	20.3445	34.0099	-1.07302	0.00249029	0.0445202	67.7028	32.17	down
AT4G33220	pectin methylesterase 44	2.02512	11.2397	5.57709	1.33984	2.0499	0.910668	-2.13298	9.06186e-05	0.00340587	6.28063	1.43347	down
AT4G33550	Bifunctional inhibitor/lipid-transfer protein/seed storage 2S albumin superfamily protein	54.0346	52.463	34.2919	8.7751	12.5847	13.3759	-2.00694	8.90524e-15	3.84454e-12	46.9298	11.5786	down
AT4G33610	glycine-rich protein	11.1005	4.60221	2.37768	1.59546	2.59532	1.27566	-1.70287	0.0025623	0.0454467	6.02678	1.82215	down
AT4G34650	squalene synthase 2	1.21029	2.32971	0.40923	0.0897387	0.214496	0.308842	-2.65922	0.00041644	0.0115722	1.31641	0.204359	down
AT4G34980	subtilisin-like serine protease 2	19.2801	48.7496	28.975	11.5111	14.6853	13.659	-1.28111	5.91496e-05	0.00240348	32.3349	13.2852	down
AT4G35160	O-methyltransferase family protein	3.80704	2.30551	3.18027	6.49238	6.55029	8.62553	1.22579	9.61258e-06	0.000552044	3.09761	7.22273	up
AT4G35320		2.81003	7.89859	2.48028	1.32088	1.03596	0.154974	-2.39516	0.000588136	0.0150758	4.3963	0.837272	down
AT4G35560	Transducin/WD40 repeat-like superfamily protein	7.48213	4.06947	3.27211	1.43649	0.938406	1.10835	-2.08108	7.57e-10	1.4556e-07	4.94124	1.16108	down
AT4G36240	GATA transcription factor 7	2.80629	3.84469	2.26742	1.24163	1.54097	0.761998	-1.32569	0.00172704	0.0340288	2.9728	1.18153	down
AT4G36360	beta-galactosidase 3	5.68222	10.7039	6.37638	2.44634	4.90932	3.30392	-1.08822	0.00117847	0.0256101	7.58749	3.5532	down
AT4G36700	RmlC-like cupins superfamily protein	0.407749	0.514436	0.775857	3.48016	2.48709	1.63326	2.14124	4.58212e-07	4.02778e-05	0.566014	2.5335	up
AT4G37540	LOB domain-containing protein 39	7.08719	6.93313	5.32486	19.7633	17.8316	17.3651	1.51145	1.93013e-15	9.66681e-13	6.44839	18.32	up
AT4G37770	1-amino-cyclopropane-1-carboxylate synthase 8	1.1252	1.17118	1.03787	5.40207	3.83876	5.70995	2.1661	4.21087e-15	2.01523e-12	1.11142	4.98359	up
AT4G37970	cinnamyl alcohol dehydrogenase 6	4.35435	3.48825	3.37971	0.818586	0.574223	0.801739	-2.35384	4.1981e-12	1.18961e-09	3.74077	0.731516	down
AT4G38080	hydroxyproline-rich glycoprotein family protein	8.93677	6.30754	3.27622	2.60284	2.09373	0.876992	-1.72448	0.000614871	0.0155057	6.17351	1.85785	down
AT4G38340	Plant regulator RWP-RK family protein	1.0504	1.36545	1.01363	0.0751977	0.0337012	0.335261	-2.93844	1.94212e-05	0.000984128	1.14316	0.148053	down
AT4G38530	phospholipase C1	3.69931	1.96197	1.76587	0.357769	0.277924	1.36561	-1.87145	0.00197806	0.0375625	2.47572	0.6671	down
AT4G38620	myb domain protein 4	14.7842	16.4632	12.4044	45.2659	46.3654	40.8128	1.60485	3.32948e-23	5.9753e-20	14.5506	44.148	up
AT4G38690	PLC-like phosphodiesterases superfamily protein	4.55725	10.5108	7.74896	3.48927	4.48083	3.05462	-1.05213	0.00253765	0.0451286	7.60568	3.67491	down
AT4G38770	proline-rich protein 4	15.5721	69.9076	23.587	2.99345	5.78624	3.27389	-3.17002	9.65392e-11	2.28469e-08	36.3556	4.01786	down
AT4G38870	F-box and associated interaction domains-containing protein	0.130293	0.0887673	0.136053	1.79207	0.303074	0.476052	2.83646	0.00133834	0.0279288	0.118371	0.857064	up
AT4G39330	cinnamyl alcohol dehydrogenase 9	1.53124	9.60631	3.33778	0.173852	0.422966	0.279735	-4.03376	2.95135e-10	6.17089e-08	4.82511	0.292184	down
AT4G39404	other RNA	1.94424	1.76612	1.62415	5.12315	6.12275	5.82865	1.68505	0.000261661	0.0080502	1.77817	5.69152	up
AT4G39770	Haloacid dehalogenase-like hydrolase (HAD) superfamily protein	0.845584	3.42698	1.49425	0.573918	0.272342	0.570372	-2.02856	0.00107447	0.0239294	1.92227	0.47221	down
AT4G39800	myo-inositol-1-phosphate synthase 1	43.5075	77.0108	40.01	9.87584	16.0671	15.0683	-1.95967	6.84313e-11	1.65588e-08	53.5094	13.6704	down
AT5G01190	laccase 10	0.274968	0.145703	0.24884	0	0.0213201	0	-4.79421	0.00172392	0.0339984	0.22317	0.00710669	down
AT5G01240	like AUXIN RESISTANT 1	3.53753	6.93428	5.02892	2.14744	2.88725	2.41873	-1.05572	0.000607466	0.0153369	5.16691	2.48447	down
AT5G01360	Plant protein of unknown function (DUF828)	0.366021	0.741704	0.235201	0	0.0523938	0.0548648	-3.60568	0.00110006	0.0243482	0.447642	0.0357529	down
AT5G01380	Homeodomain-like superfamily protein	3.91905	1.73513	2.97122	8.82004	5.91397	6.57793	1.30487	0.000114985	0.00415489	2.87513	7.10398	up
AT5G01520	RING/U-box superfamily protein	52.3705	32.64	40.013	16.2795	14.3868	21.9689	-1.24303	6.05063e-07	5.19149e-05	41.6745	17.5451	down
AT5G01790		2.973	6.06458	2.13498	0.703851	0.679417	1.01637	-2.20779	2.22975e-05	0.001109	3.72419	0.799879	down
AT5G02020		31.6948	15.7093	22.0554	9.93409	9.84911	11.7827	-1.1325	3.41197e-05	0.0015437	23.1532	10.522	down
AT5G02190	Eukaryotic aspartyl protease family protein	0.519415	0.786382	0.30993	0.0513502	0.138081	0.0963956	-2.47408	0.0013212	0.0277258	0.538576	0.0952756	down
AT5G02430	Transducin/WD40 repeat-like superfamily protein	1.10533	0.683325	0.692519	2.58162	2.28543	1.45089	1.35332	8.20199e-05	0.00316666	0.827059	2.10598	up
AT5G03190	conserved peptide upstream open reading frame 47	19.2743	23.8289	14.0364	7.30882	9.19868	7.95289	-1.21589	1.23542e-07	1.31064e-05	19.0465	8.15346	down
AT5G03204		49.6205	56.0017	72.5398	23.0227	26.9318	21.6093	-1.32182	4.96543e-06	0.000311766	59.3874	23.8546	down
AT5G03435	Ca2+dependent plant phosphoribosyltransferase family protein	1.13731	0.948437	0.685299	0.445138	0.0867378	0.236154	-1.85829	0.00146163	0.0300933	0.923683	0.25601	down
AT5G03530	RAB GTPase homolog C2A	2.08455	4.20438	2.6268	1.02692	0.920463	1.37696	-1.42164	0.000489006	0.0130823	2.97191	1.10811	down
AT5G03640	Protein kinase superfamily protein	0.285077	0.436144	0.338416	0.0467248	0	0.0292376	-3.83796	2.70095e-05	0.00129261	0.353212	0.0253208	down
AT5G03760	Nucleotide-diphospho-sugar transferases superfamily protein	2.39577	8.52378	3.24461	0.471008	1.67184	0.725032	-2.29303	3.83708e-05	0.00168643	4.72139	0.95596	down
AT5G04530	3-ketoacyl-CoA synthase 19	0.75988	1.19781	0.560099	0.0463995	0.0415895	0	-4.83947	1.5685e-07	1.57113e-05	0.839263	0.0293297	down
AT5G04660	cytochrome P450, family 77, subfamily A, polypeptide 4	1.17013	1.37955	1.18546	0.516872	0.509621	0.606426	-1.19216	0.00191823	0.0368518	1.24505	0.544306	down
AT5G04885	Glycosyl hydrolase family protein	6.26678	8.22273	6.29662	2.74665	4.58371	2.81548	-1.03049	0.000142975	0.00491136	6.92871	3.38194	down
AT5G05160	Leucine-rich repeat protein kinase family protein	2.19833	2.87177	2.20369	0.738922	1.03244	0.979143	-1.39698	4.92042e-06	0.000310751	2.4246	0.916837	down
AT5G05270	Chalcone-flavanone isomerase family protein	32.0384	11.4637	8.44798	1.85253	2.09538	0.3312	-3.591	4.01324e-05	0.00175313	17.3167	1.42637	down
AT5G05840	Protein of unknown function (DUF620)	0.761788	1.94206	1.53961	0.280596	0.571611	0.526741	-1.61977	0.00190433	0.036716	1.41449	0.459649	down
AT5G05960	Bifunctional inhibitor/lipid-transfer protein/seed storage 2S albumin superfamily protein	18.7161	27.5261	25.1104	2.10262	2.03542	3.39448	-3.24366	2.46218e-24	5.30256e-21	23.7842	2.51084	down
AT5G06480	Immunoglobulin E-set superfamily protein	3.06248	3.30353	3.25117	1.72196	1.42473	0.994613	-1.22123	0.0023408	0.0425054	3.20573	1.38043	down
AT5G07030	Eukaryotic aspartyl protease family protein	0.851101	3.94702	0.729691	0.162747	0.125036	0.0218222	-4.15832	4.32586e-07	3.83381e-05	1.8426	0.103202	down
AT5G07990	Cytochrome P450 superfamily protein	47.5021	14.5624	12.917	3.65867	2.34847	2.21552	-3.17665	2.8647e-12	8.45126e-10	24.9938	2.74089	down
AT5G08260	serine carboxypeptidase-like 35	15.298	39.3771	20.7223	6.86494	13.1657	11.039	-1.27249	0.000631329	0.0157913	25.1325	10.3566	down
AT5G09480	hydroxyproline-rich glycoprotein family protein	1.92583	3.64458	0.625635	0	0.398193	0.208486	-3.31066	0.000396262	0.0111554	2.06535	0.202226	down
AT5G09520	hydroxyproline-rich glycoprotein family protein	10.6347	3.42139	3.63991	1.07326	1.8553	0.863465	-2.20284	0.000119842	0.00427979	5.89866	1.26401	down
AT5G09570	Cox19-like CHCH family protein	3.36212	4.74477	3.96214	9.59761	11.6192	11.2313	1.42662	4.18262e-08	5.06049e-06	4.02301	10.816	up
AT5G10140	K-box region and MADS-box transcription factor family protein	0.626522	1.51766	1.08164	3.72872	6.1403	3.58121	2.05515	1.71577e-06	0.000127857	1.07528	4.48341	up
AT5G10570	basic helix-loop-helix (bHLH) DNA-binding superfamily protein	0.510294	1.96115	0.885356	0	0	0.0764907	-5.44415	2.26883e-05	0.00112584	1.11893	0.0254969	down
AT5G11290	Plant protein of unknown function (DUF247)	0.538587	0.334747	0.402558	1.47126	1.23962	1.57427	1.75468	4.20762e-05	0.00181594	0.425297	1.42838	up
AT5G11590	Integrase-type DNA-binding superfamily protein	0.454688	1.65213	0.52592	0	0.130172	0.102233	-3.46751	0.000422434	0.0116935	0.877578	0.0774685	down
AT5G12950	Putative glycosyl hydrolase of unknown function (DUF1680)	19.255	24.5419	16.5865	8.82897	9.32357	9.40117	-1.12693	1.50705e-09	2.59646e-07	20.1278	9.18457	down
AT5G13400	Major facilitator superfamily protein	0.591998	1.85615	0.733827	0.0396466	0.390903	0.223276	-2.26283	0.00224057	0.0411363	1.06066	0.217942	down
AT5G13580	ABC-2 type transporter family protein	4.8376	1.73662	1.68035	0.949109	1.31475	0.307746	-1.67105	0.00284111	0.0491127	2.75152	0.857202	down
AT5G13930	Chalcone and stilbene synthase family protein	272.746	109.821	117.826	29.4569	21.3778	14.9149	-2.92244	8.9861e-16	4.60773e-13	166.798	21.9166	down
AT5G14650	Pectin lyase-like superfamily protein	30.3538	10.9657	22.6614	10.354	7.12937	11.4997	-1.14074	0.00151124	0.0308494	21.3269	9.66102	down
AT5G14830	transposable element gene	1.3028	1.13344	1.36423	0.514281	0.734136	0.393318	-1.2101	0.00134464	0.0280059	1.26682	0.547245	down
AT5G14920	Gibberellin-regulated family protein	8.87123	26.1822	14.9679	3.42143	4.53488	3.07473	-2.18062	1.58798e-08	2.07265e-06	16.6738	3.67702	down
AT5G15130	WRKY DNA-binding protein 72	2.30022	1.40601	1.74194	6.02512	5.44054	4.54513	1.55792	2.96046e-09	4.75794e-07	1.81606	5.33693	up
AT5G15340	Pentatricopeptide repeat (PPR) superfamily protein	0.445794	0.34421	0.521362	0.809822	1.18214	1.43334	1.38536	0.00185883	0.0360322	0.437122	1.14177	up
AT5G15500	Ankyrin repeat family protein	47.2594	31.839	27.5607	16.0677	15.8912	15.3709	-1.16457	9.31863e-08	1.02391e-05	35.5531	15.7766	down
AT5G15800	K-box region and MADS-box transcription factor family protein	0.610204	0.527906	0.8253	0.0904886	0.243325	0.141556	-2.04024	0.00284149	0.0491127	0.65447	0.158456	down
AT5G15970	stress-responsive protein (KIN2) / stress-induced protein (KIN2) / cold-responsive protein (COR6.6) / cold-regulated protein (COR6.6)	1637.67	4031.68	2403.38	393.344	915.272	771.256	-1.9505	2.11966e-07	2.05626e-05	2690.91	693.291	down
AT5G16530	Auxin efflux carrier family protein	1.06687	0.753765	0.726183	0.246102	0.183825	0.192494	-2.03037	0.00186798	0.0361446	0.848938	0.207474	down
AT5G17050	UDP-glucosyl transferase 78D2	68.3293	33.9714	41.4482	23.0078	23.9877	18.9527	-1.11902	2.91613e-05	0.00135934	47.9163	21.9827	down
AT5G17220	glutathione S-transferase phi 12	141.827	81.8562	97.5273	41.8088	31.4288	32.911	-1.59537	2.09243e-11	5.17962e-09	107.07	35.3829	down
AT5G17460		49.382	62.8921	42.2277	21.4164	23.4564	18.2956	-1.28667	4.13215e-11	1.01125e-08	51.5006	21.0561	down
AT5G19470	nudix hydrolase homolog 24	6.89029	4.54145	2.35591	0	0	0.156125	-6.43781	7.36978e-15	3.37693e-12	4.59588	0.0520415	down
AT5G19890	Peroxidase superfamily protein	2.87879	1.20469	2.99931	0.235037	0.15048	0.504246	-2.99479	5.29459e-07	4.61637e-05	2.36093	0.296587	down
AT5G20270	heptahelical transmembrane protein1	4.97241	5.22433	3.32804	0.839537	2.61984	0.321036	-1.82895	0.00240032	0.0434397	4.50826	1.26014	down
AT5G20635		0.203543	0.665625	0.374073	0	0	0	-5.82186	0.000322719	0.00948168	0.414414	0	down
AT5G20860	Plant invertase/pectin methylesterase inhibitor superfamily	1.49119	0.59109	0.249139	0.168865	0.0504533	0	-3.41605	0.000941772	0.0216226	0.777141	0.0731061	down
AT5G21960	Integrase-type DNA-binding superfamily protein	0.749839	1.48249	1.51071	3.38819	3.93984	3.22316	1.48317	0.00013235	0.00464217	1.24768	3.51706	up
AT5G22310		1.54225	5.07846	3.3819	1.17846	0.936714	1.02263	-1.67864	0.000131868	0.0046328	3.3342	1.04593	down
AT5G22500	fatty acid reductase 1	4.31814	2.87795	1.78401	11.3035	7.99186	4.91608	1.43837	0.000160365	0.00540473	2.99336	8.07048	up
AT5G23750	Remorin family protein	20.8846	19.3219	18.6643	9.39284	7.10241	10.195	-1.13982	2.4422e-08	3.02271e-06	19.6236	8.89676	down
AT5G23980	ferric reduction oxidase 4	3.27374	3.51146	3.3528	1.38236	1.53161	1.94624	-1.05762	1.77405e-05	0.000916209	3.37934	1.62007	down
AT5G24140	squalene monooxygenase 2	0.689495	0.237573	0.436951	1.7523	1.52641	0.81078	1.58765	0.00231346	0.0421631	0.454673	1.36316	up
AT5G24540	beta glucosidase 31	11.101	5.28998	11.6841	3.2924	1.64487	3.31824	-1.77219	4.68893e-06	0.000297878	9.35836	2.75184	down
AT5G24640		2.14201	3.0354	4.5092	9.24978	10.0448	9.6837	1.5657	1.24232e-05	0.000682514	3.22887	9.65942	up
AT5G24770	vegetative storage protein 2	384.032	589.517	373.486	89.3277	205.782	125.847	-1.67099	1.49253e-07	1.50907e-05	449.011	140.319	down
AT5G25110	CBL-interacting protein kinase 25	19.1543	10.9891	16.7403	5.23238	2.03613	3.18627	-2.17198	8.23396e-10	1.54197e-07	15.6279	3.48493	down
AT5G25390	Integrase-type DNA-binding superfamily protein	0.424912	1.77553	0.390453	0	0.0395355	0	-5.84596	9.89014e-05	0.00365935	0.86363	0.0131785	down
AT5G25610	BURP domain-containing protein	119.107	221.153	82.6061	7.55217	8.36205	5.75943	-4.27832	1.02976e-37	3.69616e-34	140.956	7.22455	down
AT5G26230		1.74876	5.65229	2.00444	0.506595	0.60544	1.14911	-2.0445	0.000482945	0.0129523	3.13517	0.753716	down
AT5G26940	Polynucleotidyl transferase, ribonuclease H-like superfamily protein	92.2068	41.268	60.7734	32.9285	21.4146	31.4694	-1.17538	9.9062e-05	0.00365935	64.7494	28.6042	down
AT5G27890		0.263424	0.478581	0.308078	0	0.02451	0	-5.24157	0.00031566	0.009338	0.350028	0.00817	down
AT5G28237	Pyridoxal-5'-phosphate-dependent enzyme family protein	389.922	139.653	312.607	182.89	80.7969	96.3555	-1.23268	0.00162546	0.0325334	280.727	120.014	down
AT5G28913	transposable element gene	1.14885	3.67348	1.42038	0.429323	0.812393	0.44774	-1.87589	0.00260981	0.0459942	2.0809	0.563152	down
AT5G35960	Protein kinase family protein	0.194076	0.470122	0.243187	0	0.030096	0	-4.73388	0.00243843	0.043908	0.302462	0.010032	down
AT5G37300	O-acyltransferase (WSD1-like) family protein	0.12629	0.803043	0.274297	0	0	0.0246095	-5.4977	0.000390092	0.011025	0.40121	0.00820315	down
AT5G37670	HSP20-like chaperones superfamily protein	8.20055	3.35947	5.17143	1.41876	1.72052	2.19332	-1.63889	0.000412582	0.0114946	5.57715	1.77753	down
AT5G37690	SGNH hydrolase-type esterase superfamily protein	0.99636	0.740519	0.151332	0.0940244	0	0.0294174	-3.95206	0.000695697	0.0169486	0.629404	0.0411473	down
AT5G38030	MATE efflux family protein	3.61687	1.42239	3.33461	0.961513	0.9234	1.03141	-1.52332	0.000198718	0.00644518	2.79129	0.972108	down
AT5G38120	AMP-dependent synthetase and ligase family protein	1.80999	1.66609	1.53217	0.70144	0.516453	0.235135	-1.79092	4.79897e-05	0.00201857	1.66942	0.484343	down
AT5G38280	PR5-like receptor kinase	2.18	2.09485	2.39302	0.542359	0.771112	0.526617	-1.85556	2.10902e-09	3.52092e-07	2.22262	0.613363	down
AT5G38910	RmlC-like cupins superfamily protein	1.3098	4.47591	0.833645	15.5386	13.7537	9.23697	2.54923	2.16017e-06	0.000153607	2.20645	12.8431	up
AT5G39530	Protein of unknown function (DUF1997)	4.27739	12.2645	9.45558	2.08414	3.60081	2.4098	-1.68549	3.76111e-05	0.00166665	8.66582	2.69825	down
AT5G40010	AAA-ATPase 1	8.26425	6.32954	4.17379	42.585	32.7176	27.419	2.46004	1.01559e-19	1.09358e-16	6.25586	34.2405	up
AT5G40020	Pathogenesis-related thaumatin superfamily protein	6.73149	6.47925	4.9157	1.80475	1.74209	3.64851	-1.32213	0.000343546	0.00998463	6.04215	2.39845	down
AT5G40350	myb domain protein 24	2.01902	1.49016	3.86517	1.13524	0.587054	0.778671	-1.58266	0.00269424	0.0472117	2.45812	0.833656	down
AT5G40390	Raffinose synthase family protein	14.779	10.1559	11.0029	5.46591	6.14813	3.85136	-1.21413	4.49383e-07	3.96636e-05	11.9792	5.15513	down
AT5G40790		0.686288	0.249366	0.152881	0	0	0	-5.43605	0.0019425	0.0371481	0.362845	0	down
AT5G40800		9.88389	5.55364	4.00066	0.158659	0.995483	0.496396	-3.52684	8.99767e-10	1.64215e-07	6.4794	0.550179	down
AT5G41460	Protein of unknown function (DUF604)	1.31516	4.64835	1.65795	0.372326	0.489469	0.675639	-2.29914	2.86024e-05	0.00134788	2.54048	0.512478	down
AT5G41730	Protein kinase family protein	2.20743	1.20667	1.79506	5.08979	3.67154	3.19757	1.19698	0.000127534	0.00450258	1.73639	3.9863	up
AT5G41900	alpha/beta-Hydrolases superfamily protein	0.924968	1.93719	0.36488	0.0533422	0.19125	0.0500675	-3.42204	4.49125e-05	0.00191153	1.07568	0.09822	down
AT5G42510	Disease resistance-responsive (dirigent-like protein) family protein	26.3735	4.83288	17.2062	6.15389	2.97013	3.18426	-1.98048	0.000315648	0.009338	16.1375	4.10276	down
AT5G42800	dihydroflavonol 4-reductase	181.316	85.967	87.1933	31.098	20.1838	17.4834	-2.36144	4.54415e-13	1.50558e-10	118.159	22.9217	down
AT5G43150		66.6311	111.131	79.3251	26.835	36.6557	31.5731	-1.43252	5.32516e-09	7.80154e-07	85.6957	31.6879	down
AT5G43500	actin-related protein 9	6.23892	7.78177	5.32335	14.5172	13.6159	11.3209	1.03079	3.46268e-07	3.12018e-05	6.44801	13.1513	up
AT5G44260	Zinc finger C-x8-C-x5-C-x3-H type family protein	1.51258	2.34529	2.83212	0.757993	0.412503	0.889324	-1.71123	0.000101001	0.00371688	2.22999	0.686607	down
AT5G44390	FAD-binding Berberine family protein	2.33309	4.27944	2.88599	7.77787	10.2695	6.95066	1.39617	1.55107e-06	0.000117619	3.16617	8.33269	up
AT5G44400	FAD-binding Berberine family protein	51.412	37.2163	46.0363	17.2807	19.8947	22.4971	-1.1712	3.10463e-09	4.88039e-07	44.8882	19.8908	down
AT5G44410	FAD-binding Berberine family protein	2.89733	6.55817	4.14631	1.57774	2.58531	1.87424	-1.16891	0.00155372	0.0314995	4.53394	2.01243	down
AT5G44430	plant defensin 1.2C	2.30278	6.52645	69.0211	0.0956157	1.19985	0.0897458	-5.84585	0.000407201	0.0114038	25.9501	0.461738	down
AT5G44550	Uncharacterised protein family (UPF0497)	1.65349	1.94378	0.406256	0.0504824	0.0904984	0	-4.79653	2.83623e-05	0.0013395	1.33451	0.0469936	down
AT5G44570		4.97297	8.68184	8.8927	37.1838	29.2805	31.1914	2.10411	3.11247e-14	1.21873e-11	7.51584	32.5519	up
AT5G44574		0.78433	2.42241	2.09665	4.64077	6.42199	6.34276	1.70446	0.0002763	0.0084045	1.7678	5.80184	up
AT5G44670	Domain of unknown function (DUF23)	3.40881	3.42146	2.26754	0.808177	1.64458	1.43512	-1.21191	0.000515224	0.0136649	3.0326	1.29596	down
AT5G45310		2.07175	2.26422	1.8118	0.571246	0.572267	0.378478	-2.01246	5.08268e-07	4.44962e-05	2.04926	0.50733	down
AT5G45820	CBL-interacting protein kinase 20	1.2806	5.671	4.01165	0.775441	0.843996	0.935789	-2.10607	4.44456e-05	0.00189988	3.65442	0.851742	down
AT5G45940	nudix hydrolase homolog 11	3.4772	7.31246	3.9393	2.12614	2.43757	1.57793	-1.26006	0.0015643	0.03162	4.90965	2.04721	down
AT5G46610	Aluminium activated malate transporter family protein	0.0589633	0.0178538	0	0.489653	0.292596	0.191497	3.72991	0.000667781	0.016417	0.0256057	0.324582	up
AT5G46871	Putative membrane lipoprotein	16.9018	13.5941	11.0306	32.1656	25.8825	39.111	1.23563	1.31091e-05	0.000714219	13.8422	32.3864	up
AT5G47550	Cystatin/monellin superfamily protein	39.8158	32.1417	36.5166	7.21898	12.3724	10.6477	-1.83691	4.29675e-13	1.44586e-10	36.1581	10.0797	down
AT5G47800	Phototropic-responsive NPH3 family protein	1.81248	2.38016	1.46471	0.633962	0.384939	0.575847	-1.82612	7.5997e-07	6.29489e-05	1.88578	0.531583	down
AT5G48360	Actin-binding FH2 (formin homology 2) family protein	0.29236	0.722957	0.447752	0.118022	0.120899	0.158252	-1.88123	0.00214641	0.0398361	0.48769	0.132391	down
AT5G48850	Tetratricopeptide repeat (TPR)-like superfamily protein	36.138	32.6242	25.1156	7.50259	7.31413	9.76442	-1.92517	4.64695e-19	4.00307e-16	31.2926	8.19371	down
AT5G48900	Pectin lyase-like superfamily protein	0.243855	1.89518	0.837469	0.0281259	0.0504205	0.0791977	-4.22904	1.52803e-05	0.000804588	0.992168	0.0525814	down
AT5G49120	Protein of unknown function (DUF581)	3.60746	2.73081	2.41084	0.499296	0.839132	0.234322	-2.46371	7.53401e-06	0.000445749	2.91637	0.52425	down
AT5G50720	HVA22 homologue E	4.68619	5.07325	6.2206	0.666368	2.50862	2.43929	-1.50188	0.00240421	0.0434469	5.32668	1.87142	down
AT5G50740	Heavy metal transport/detoxification superfamily protein	0.245209	1.59633	1.70699	0.084846	0.0380253	0.159275	-3.67185	0.000190233	0.00622624	1.18284	0.0940486	down
AT5G50800	Nodulin MtN3 family protein	4.69921	7.02367	3.36875	0.207575	0.527161	1.00663	-3.09492	1.97151e-09	3.31707e-07	5.03055	0.580455	down
AT5G51440	HSP20-like chaperones superfamily protein	5.31896	4.83167	2.06843	8.85317	10.1966	7.37148	1.12784	0.00167015	0.033138	4.07302	8.80708	up
AT5G51550	EXORDIUM like 3	1.33929	7.51584	3.85364	0.895936	1.77227	1.15991	-1.72907	0.00239828	0.0434394	4.23626	1.27604	down
AT5G52310	low-temperature-responsive protein 78 (LTI78) / desiccation-responsive protein 29A (RD29A)	362.752	569.782	239.215	120.465	123.631	85.3426	-1.8237	1.02842e-09	1.84568e-07	390.583	109.813	down
AT5G52320	cytochrome P450, family 96, subfamily A, polypeptide 4	7.02373	16.1396	10.7126	3.58197	4.2581	5.34116	-1.35937	4.37801e-05	0.00188193	11.292	4.39374	down
AT5G52390	PAR1 protein	71.5949	67.923	89.3206	12.7319	21.6488	20.0098	-2.07254	3.12516e-16	1.77114e-13	76.2795	18.1302	down
AT5G52940	Protein of unknown function (DUF295)	2.85715	3.73088	1.09394	5.40651	6.45218	6.06053	1.23904	0.00194906	0.0372117	2.56066	5.97307	up
AT5G54060	UDP-glucose:flavonoid 3-o-glucosyltransferase	48.3869	20.6678	22.3729	10.1385	6.61385	4.82623	-2.07919	1.87589e-08	2.40471e-06	30.4758	7.19287	down
AT5G54160	O-methyltransferase 1	586.031	490.64	548.835	1151.41	1109.19	1028.09	1.01642	4.64894e-14	1.78785e-11	541.835	1096.23	up
AT5G54400	S-adenosyl-L-methionine-dependent methyltransferases superfamily protein	4.41128	0.525527	2.96011	0.412871	0.639214	0.810278	-2.07553	0.0028345	0.0490705	2.6323	0.620788	down
AT5G55150	Protein of unknown function (DUF295)	0.50087	0.454983	0.193112	1.4398	1.21885	1.20125	1.76762	0.00108487	0.0240614	0.382989	1.28663	up
AT5G55180	O-Glycosyl hydrolases family 17 protein	14.8892	7.82664	6.30597	32.6138	29.2087	20.9234	1.52092	2.09532e-06	0.000150781	9.67395	27.582	up
AT5G55950	Nucleotide/sugar transporter family protein	1.41825	1.01709	0.581986	0.129141	0.208357	0.315154	-2.18506	0.000236456	0.00743113	1.00578	0.217551	down
AT5G56860	GATA type zinc finger transcription factor family protein	2.18827	5.64714	4.38307	1.2132	1.689	1.18718	-1.58241	7.91809e-05	0.00307805	4.07283	1.36313	down
AT5G56970	cytokinin oxidase 3	0.706339	0.665393	1.28937	2.63414	2.60448	2.82927	1.58507	1.94807e-05	0.000984827	0.887035	2.6893	up
AT5G57260	cytochrome P450, family 71, subfamily B, polypeptide 10	0.0518018	0.094112	0	1.20989	0.626579	0.201886	3.82497	0.000240959	0.00753164	0.0486379	0.67945	up
AT5G57560	Xyloglucan endotransglucosylase/hydrolase family protein	16.9953	8.12727	9.30167	30.4576	50.7109	23.2205	1.60869	6.752e-06	0.000407314	11.4747	34.7963	up
AT5G57760		0.754545	6.44293	3.65587	0.313301	1.12329	0.441101	-2.52662	0.00196821	0.0374779	3.61778	0.625899	down
AT5G57770	Plant protein of unknown function (DUF828) with plant pleckstrin homology-like region	0.198832	2.11579	1.16268	0.176912	0.0264287	0.221401	-3.04591	0.00108226	0.0240497	1.1591	0.141581	down
AT5G58080	response regulator 18	0.109748	0.0598163	0.220032	0.546835	0.551417	0.556037	2.06181	0.00196443	0.0374721	0.129866	0.551429	up
AT5G58390	Peroxidase superfamily protein	0.0342019	1.5845	1.14285	0	0.127291	0.0333236	-4.08673	0.00198112	0.0375625	0.920515	0.0535383	down
AT5G58860	cytochrome P450, family 86, subfamily A, polypeptide 1	1.75912	1.49143	0.39187	0.146084	0	0	-4.67525	5.30726e-06	0.000330338	1.21414	0.0486947	down
AT5G59320	lipid transfer protein 3	144.97	108.312	42.8416	14.6924	6.61316	4.17891	-3.53335	9.59305e-14	3.50163e-11	98.7078	8.49482	down
AT5G59620	transposable element gene	0	0	0	0.311238	0.162735	0.0730326	5.43151	0.00214644	0.0398361	0	0.182335	up
AT5G60580	RING/U-box superfamily protein	16.5987	10.1794	13.0354	6.15367	5.48017	6.85654	-1.10339	1.85987e-06	0.000134862	13.2712	6.16346	down
AT5G61290	Flavin-binding monooxygenase family protein	1.77893	4.37258	2.27279	0.597433	0.730229	0.71369	-2.04052	2.77683e-06	0.00019106	2.8081	0.68045	down
AT5G62040	PEBP (phosphatidylethanolamine-binding protein) family protein	1.48465	1.70353	1.50132	0.243336	0.508927	0.228398	-2.24605	0.00161006	0.0322851	1.56317	0.326887	down
AT5G62100	BCL-2-associated athanogene 2	2.13703	2.17156	1.02876	0.300791	0.572921	0.705813	-1.73452	0.00102895	0.0231309	1.77912	0.526508	down
AT5G62165	AGAMOUS-like 42	2.63897	2.11927	1.24603	0	0.106757	0.372638	-3.6145	3.45457e-06	0.000229187	2.00142	0.159798	down
AT5G62220	glycosyltransferase 18	5.58499	7.60999	6.19078	3.20534	3.12289	3.16553	-1.03014	4.48128e-06	0.000287229	6.46192	3.16459	down
AT5G62350	Plant invertase/pectin methylesterase inhibitor superfamily protein	27.3871	137.052	75.7773	17.3348	23.7003	26.0764	-1.83846	5.78576e-05	0.00235989	80.072	22.3705	down
AT5G62960		0.920901	1.58653	0.742763	0.428524	0.354555	0.154699	-1.79362	0.00288685	0.0495389	1.0834	0.312593	down
AT5G63580	flavonol synthase 2	1.94503	2.4669	1.59415	0.952372	0.853646	0.643612	-1.29181	0.00131662	0.0276901	2.00203	0.816543	down
AT5G64190		50.1179	13.1646	29.6315	13.761	9.74787	13.9445	-1.30614	0.00119737	0.0258642	30.9713	12.4845	down
AT5G64330	Phototropic-responsive NPH3 family protein	1.66098	6.95182	2.59351	0.612324	1.60322	1.08897	-1.75173	0.00104944	0.023518	3.73544	1.1015	down
AT5G64750	Integrase-type DNA-binding superfamily protein	1.90025	0.791157	0.925987	3.36977	3.51158	2.85432	1.44147	0.000141079	0.00486904	1.2058	3.24522	up
AT5G65510	AINTEGUMENTA-like 7	0.33448	0.0506394	0.0232844	1.07055	0.674295	1.46651	3.02912	0.000298121	0.00896696	0.136135	1.07045	up
AT5G67070	ralf-like 34	3.27958	11.3207	7.16524	1.62362	3.94341	1.67142	-1.5873	0.0024157	0.0435651	7.25516	2.41282	down
AT5G67090	Subtilisin-like serine endopeptidase family protein	0.544868	0.718476	0.513896	0.200696	0.179891	0.23975	-1.51582	0.00209652	0.0391254	0.592413	0.206779	down
AT5G67210	Protein of unknown function (DUF579)	2.83007	7.49294	5.44908	1.93462	2.63321	1.74859	-1.32325	0.00107351	0.0239294	5.25736	2.10547	down

## Sheet: C3vss3
DEGs between sad2-5 and Col-0 three days after inoculation of Pst DC3000
GeneID	Short_description	NormalizedTPM_Col_3d_rep1	NormalizedTPM_Col_3d_rep2	NormalizedTPM_Col_3d_rep3	NormalizedTPM_sad2_3d_rep1	NormalizedTPM_sad2_3d_rep2	NormalizedTPM_sad2_3d_rep3	Log2Foldchange_Col_3d_VS_sad2_3d	Pvalue_Col_3d_VS_sad2_3d	adjPvalue_Col_3d_VS_sad2_3d	MeanTPMCol_3d	MeanTPMsad2_3d	Significant
AT1G01560	MAP kinase 11	83.6086	86.08	74.518	28.7497	40.7015	48.9136	-1.00939	0.000129015	0.0281968	81.4022	39.4549	down
AT1G05575		50.5898	61.1987	36.5261	19.3234	24.689	16.9852	-1.26939	1.17456e-06	0.000890484	49.4382	20.3325	down
AT1G07135	glycine-rich protein	63.9264	60.5567	42.4539	15.6814	22.5337	25.4315	-1.35776	3.02953e-06	0.00163107	55.6457	21.2155	down
AT1G10240	FAR1-related sequence 11	2.91792	4.21688	4.71153	9.02686	7.57288	7.95085	1.06578	6.23301e-06	0.00284826	3.94877	8.18353	up
AT1G14210	Ribonuclease T2 family protein	9.17579	12.7528	13.813	5.64594	5.2377	5.2957	-1.12706	5.22635e-06	0.00262197	11.9139	5.39311	down
AT1G16420	metacaspase 8	12.0364	13.239	9.82255	3.86228	7.15618	4.49079	-1.15896	0.000103724	0.0236043	11.6993	5.16975	down
AT1G23052		0.946166	0.471319	0.852462	4.65636	3.4623	4.06611	2.43197	8.64305e-09	1.19242e-05	0.756649	4.06159	up
AT1G30250		50.5523	52.0919	66.3094	97.0392	128.662	115.153	1.03367	1.96656e-06	0.00120583	56.3179	113.618	up
AT1G36920		0.071699	0	0.613684	14.845	16.1485	9.26401	5.8944	9.13221e-19	6.71948e-15	0.228461	13.4192	up
AT1G36922		0	0.343572	0	8.91003	13.9968	10.0402	6.61862	1.67081e-15	6.83829e-12	0.114524	10.9824	up
AT1G47840	hexokinase 3	0.720764	0.653421	0.850915	0.138331	0.121691	0.0892028	-2.67364	2.14013e-05	0.00787352	0.7417	0.116408	down
AT1G52040	myrosinase-binding protein 1	89.4746	234.886	115.575	63.0891	42.2174	46.9943	-1.51746	1.49372e-05	0.00599498	146.645	50.7669	down
AT1G60270	beta glucosidase 6	1.4654	1.34841	1.28786	0.46606	0.204998	0.0939186	-2.46871	1.72725e-05	0.00668902	1.36722	0.254992	down
AT1G60860	ARF-GAP domain 2	2.59537	3.72183	3.32897	7.51805	8.1155	4.63104	1.07196	3.86384e-05	0.0111981	3.21539	6.75486	up
AT1G65060	4-coumarate:CoA ligase 3	0.690977	0.664361	0.274587	2.54922	3.1512	1.06285	2.04002	8.45255e-05	0.0205035	0.543308	2.25442	up
AT1G65390	phloem protein 2 A5	5.17611	8.14939	3.16451	1.25113	1.7668	1.24735	-1.9316	2.45903e-06	0.00139181	5.49667	1.42176	down
AT1G72920	Toll-Interleukin-Resistance (TIR) domain family protein	38.0887	47.4035	25.4693	15.301	12.5957	13.6428	-1.4024	7.15851e-08	7.90085e-05	36.9872	13.8465	down
AT1G72940	Toll-Interleukin-Resistance (TIR) domain-containing protein	62.6086	72.838	48.1921	24.9502	23.5582	23.6407	-1.33156	1.36788e-11	2.51622e-08	61.2129	24.0497	down
AT1G73540	nudix hydrolase homolog 21	75.6094	75.4475	35.5451	23.7362	26.4095	27.7837	-1.23646	9.03942e-05	0.0216887	62.2006	25.9765	down
AT1G74710	ADC synthase superfamily protein	148.482	178.278	106.674	66.6135	70.5749	59.1547	-1.12889	1.96536e-07	0.000206588	144.478	65.4477	down
AT1G80840	WRKY DNA-binding protein 40	130.677	183.157	103.69	72.9035	63.8982	52.8422	-1.13098	1.59211e-06	0.00113369	139.174	63.2146	down
AT2G01008		6.56541	4.77722	5.92454	8.93234	14.9364	19.0117	1.35245	0.000141706	0.0300771	5.75572	14.2935	up
AT2G01422		0	0	0	119.651	108.092	139.662	13.6203	8.15147e-30	1.79935e-25	0	122.469	up
AT2G04040	MATE efflux family protein	13.7478	16.5588	13.711	7.38475	7.82703	6.3829	-1.01531	6.73574e-09	9.91231e-06	14.6725	7.19823	down
AT2G07213	other RNA	0.0617798	0.194906	0.0330489	7.46155	2.87364	1.63528	5.33851	9.04196e-12	1.81447e-08	0.0965783	3.99016	up
AT2G07215		0.222675	0.351254	0.0595597	7.06431	4.74267	2.44755	4.46938	4.32577e-11	6.8205e-08	0.211163	4.75151	up
AT2G15490	UDP-glycosyltransferase 73B4	7.91202	8.50131	5.25779	3.9113	1.61213	2.77796	-1.37914	0.000140889	0.0300771	7.2237	2.76713	down
AT2G18780	F-box and associated interaction domains-containing protein	4.04496	3.80933	3.94013	1.31047	1.65535	1.38135	-1.42165	2.33881e-07	0.000234668	3.93148	1.44906	down
AT2G19900	NADP-malic enzyme 1	0.384905	0.0213038	0.260089	0.924564	1.22994	4.41702	3.369	0.000113645	0.0255981	0.222099	2.19051	up
AT2G32990	glycosyl hydrolase 9B8	1.19147	1.53141	1.91212	3.38938	3.71628	3.02903	1.14289	4.9831e-05	0.0134143	1.545	3.37823	up
AT2G35155	Trypsin family protein	4.466	5.72747	6.62337	1.53585	1.79555	2.81808	-1.40885	3.81004e-05	0.0111981	5.60561	2.04983	down
AT2G38530	lipid transfer protein 2	3.43385	3.86903	9.51267	16.5182	23.8984	17.3862	1.79741	2.26178e-05	0.00805268	5.60518	19.2676	up
AT2G39330	jacalin-related lectin 23	45.0929	110.159	39.1768	25.1682	23.4577	16.0066	-1.58184	3.90619e-05	0.0111981	64.8095	21.5442	down
AT2G44840	ethylene-responsive element binding factor 13	11.2848	21.1385	5.94243	2.3553	2.50364	4.03437	-2.06372	2.34925e-05	0.00810271	12.7886	2.96444	down
AT2G46400	WRKY DNA-binding protein 46	86.1679	129.047	59.3502	38.9958	48.5603	36.863	-1.12507	0.00012794	0.0281968	91.5217	41.473	down
AT3G04420	NAC domain containing protein 48	1.96693	1.93501	1.56134	4.16709	5.52981	4.75377	1.42301	6.86187e-07	0.000619467	1.8211	4.81689	up
AT3G04640	glycine-rich protein	105.191	93.9053	71.1304	27.2159	54.5548	28.1922	-1.28418	5.27202e-05	0.014021	90.0755	36.6543	down
AT3G20100	cytochrome P450, family 705, subfamily A, polypeptide 19	12.5993	7.60184	15.7346	29.1343	22.1237	29.9703	1.19261	0.000100341	0.0230721	11.9786	27.0761	up
AT3G23250	myb domain protein 15	23.7943	29.3095	12.4658	7.36992	8.63507	8.69044	-1.38402	2.78507e-05	0.00907295	21.8566	8.23181	down
AT3G25150	Nuclear transport factor 2 (NTF2) family protein with RNA binding (RRM-RBD-RNP motifs) domain	37.4847	50.2947	36.5558	15.5899	14.2029	10.2322	-1.63222	1.85874e-15	6.83829e-12	41.4451	13.3417	down
AT3G28899		1.08687	0	0.232567	17.9057	22.5634	23.015	5.57956	2.59511e-14	7.16055e-11	0.439811	21.1614	up
AT3G29781	transposable element gene	0	0	0	0.466153	0.798576	0.0197763	6.63536	0.000256712	0.0484329	0	0.428168	up
AT3G33528		0.53704	0	0.804407	5.55959	5.36413	3.08397	3.37323	6.33483e-06	0.00284826	0.447149	4.66923	up
AT3G42090	transposable element gene	0	0	0.771142	14.8429	20.1155	21.3418	6.25546	4.42284e-08	5.42387e-05	0.257047	18.7667	up
AT3G42100	transposable element gene	0	0	0	0.469582	0.198898	0.154209	7.49419	6.74667e-08	7.83821e-05	0	0.27423	up
AT3G42110	transposable element gene	0	0.0320744	0	1.7315	0.955746	0.84837	6.68546	4.05388e-07	0.000389067	0.0106915	1.17854	up
AT3G44260	Polynucleotidyl transferase, ribonuclease H-like superfamily protein	117.997	92.2244	50.6329	27.1754	41.817	31.5817	-1.35649	5.42393e-05	0.0141593	86.9513	33.5247	down
AT3G44350	NAC domain containing protein 61	5.26277	8.80747	4.23809	1.38582	1.49619	1.98025	-1.87657	1.02203e-05	0.00425665	6.10278	1.62075	down
AT3G46090	C2H2 and C2HC zinc fingers superfamily protein	86.7607	102.874	54.5458	33.0567	41.9416	36.9211	-1.10411	5.45229e-05	0.0141593	81.3934	37.3065	down
AT3G48650		50.2838	74.0602	35.6784	21.8358	24.5931	18.2704	-1.29374	4.13189e-06	0.0021211	53.3408	21.5664	down
AT3G51238	other RNA	8.65953	5.20003	4.02702	13.2267	21.7777	17.8355	1.58372	5.94046e-06	0.00284826	5.96219	17.6133	up
AT3G51240	flavanone 3-hydroxylase	7.62824	5.9019	4.72197	12.5854	22.3831	16.9893	1.53114	7.38401e-07	0.000626902	6.08404	17.3193	up
AT3G53370	S1FA-like DNA-binding protein	18.5627	18.5879	17.7427	7.97653	9.02189	9.79749	-1.00965	6.02377e-06	0.00284826	18.2977	8.93197	down
AT3G55980	salt-inducible zinc finger 1	93.8071	88.6559	56.2862	36.0674	41.9687	35.0995	-1.06251	6.70969e-06	0.00284826	79.5831	37.7119	down
AT4G03490	Ankyrin repeat family protein	1.21153	0.779653	0.773857	2.03298	2.49673	1.99567	1.24973	0.000122454	0.0273035	0.92168	2.17513	up
AT4G04410	transposable element gene	7.56115	4.35194	7.72757	26.1111	23.5383	20.6308	1.84362	5.09727e-13	1.12517e-09	6.54689	23.4267	up
AT4G04540	cysteine-rich RLK (RECEPTOR-like protein kinase) 39	16.1637	25.8789	12.8535	4.55011	2.66174	2.49477	-2.50198	2.39397e-14	7.16055e-11	18.2987	3.23554	down
AT4G07940	Protein of unknown function (DUF3245)	0.97818	1.44014	0.732585	0	0	0	-5.86125	0.000237977	0.0464877	1.0503	0	down
AT4G11070	WRKY family transcription factor	45.8548	39.6964	30.2671	17.3434	20.5496	17.1623	-1.05819	1.82918e-06	0.00118757	38.6061	18.3518	down
AT4G13660	pinoresinol reductase 2	2.92967	2.57936	3.86338	12.5517	17.9138	23.1387	2.55356	4.81193e-14	1.18021e-10	3.12414	17.8681	up
AT4G14090	UDP-Glycosyltransferase superfamily protein	45.0972	40.8448	21.2574	67.0164	137.977	73.3458	1.39145	0.000163606	0.0337606	35.7331	92.7796	up
AT4G22880	leucoanthocyanidin dioxygenase	39.7108	30.5213	15.421	55.9918	136.664	61.8783	1.58398	0.000223352	0.0441585	28.5511	84.8446	up
AT4G24026		21.2225	14.0645	16.7081	7.57744	8.94021	8.76665	-1.02086	0.000212265	0.0429865	17.3317	8.4281	down
AT4G24570	dicarboxylate carrier 2	103.571	80.8267	40.8945	14.7325	25.6169	29.2245	-1.65721	3.41474e-05	0.0106165	75.0972	23.1913	down
AT4G27280	Calcium-binding EF-hand family protein	89.4571	111.356	49.97	30.1213	35.5726	30.4882	-1.36395	6.6146e-06	0.00284826	83.5945	32.0607	down
AT4G30450	glycine-rich protein	13.0404	14.7786	10.9041	6.06003	6.75681	2.55599	-1.34402	0.000224053	0.0441585	12.9077	5.12428	down
AT4G30460	glycine-rich protein	36.4411	33.125	25.4758	12.2249	18.6734	13.079	-1.09543	2.13092e-05	0.00787352	31.6806	14.6591	down
AT4G34860	Plant neutral invertase family protein	7.96986	5.54423	7.18751	12.4046	12.7945	16.1216	1.02201	4.6411e-05	0.0127694	6.90053	13.7736	up
AT4G38620	myb domain protein 4	21.0366	20.6789	19.9113	64.5295	62.9566	47.604	1.51136	3.3122e-24	3.65568e-20	20.5423	58.3634	up
AT5G05300		122.719	90.1835	68.1375	30.7841	43.0953	37.9367	-1.30864	6.28492e-06	0.00284826	93.6799	37.272	down
AT5G07990	Cytochrome P450 superfamily protein	5.35094	6.35702	3.42538	14.6293	23.2835	12.877	1.75786	3.57905e-08	4.64729e-05	5.04445	16.9299	up
AT5G13930	Chalcone and stilbene synthase family protein	60.2063	51.0859	24.1149	91.2802	220.717	119.144	1.68962	4.41824e-05	0.0125036	45.1357	143.714	up
AT5G15800	K-box region and MADS-box transcription factor family protein	1.57353	4.2422	1.959	0.541397	0.14008	0.102683	-3.35444	7.01579e-07	0.000619467	2.59158	0.261386	down
AT5G21960	Integrase-type DNA-binding superfamily protein	16.6332	14.0208	3.71713	1.35359	2.04132	3.66292	-2.22924	0.000156423	0.0328846	11.457	2.35261	down
AT5G22380	NAC domain containing protein 90	27.1357	25.7157	15.401	11.2962	7.39829	6.25749	-1.45715	1.71589e-06	0.00118364	22.7508	8.31732	down
AT5G22460	alpha/beta-Hydrolases superfamily protein	2.0572	1.46347	3.07491	4.95038	6.99153	10.098	1.78155	2.25731e-05	0.00805268	2.19853	7.34663	up
AT5G22520		35.3126	45.0104	27.1963	14.7597	17.6263	11.4041	-1.28751	9.39381e-07	0.000760408	35.8398	14.5967	down
AT5G24910	cytochrome P450, family 714, subfamily A, polypeptide 1	6.58714	6.70993	3.85528	1.27743	2.76447	1.37979	-1.64586	3.05438e-05	0.00977135	5.71745	1.80723	down
AT5G38280	PR5-like receptor kinase	2.69633	4.62636	1.74606	0.2567	0.156338	0.111417	-4.12597	9.74085e-16	5.37549e-12	3.02291	0.174818	down
AT5G43500	actin-related protein 9	8.43462	8.96877	8.34081	22.8347	20.3454	14.8329	1.17307	3.0509e-11	5.18042e-08	8.5814	19.3377	up
AT5G46295		1.90387	1.36989	1.71532	0	0.0981243	0	-5.53292	9.25092e-05	0.0217616	1.66303	0.0327081	down
AT5G47850	CRINKLY4 related 4	11.9008	12.6239	4.37337	3.43663	3.27658	1.64042	-1.79806	2.63614e-05	0.00881668	9.63268	2.78454	down

## Sheet: C0vsOS0
DEGs between OESAD2/Col-0 and Col-0 before inoculation of Pst DC3000
GeneID	Short_description	NormalizedTPM_Col_0d_rep1	NormalizedTPM_Col_0d_rep2	NormalizedTPM_Col_0d_rep3	NormalizedTPM_OxSAD2_0d_rep1	NormalizedTPM_OxSAD2_0d_rep2	NormalizedTPM_OxSAD2_0d_rep3	Log2Foldchange_Col_0d_VS_OxSAD2_0d	Pvalue_Col_0d_VS_OxSAD2_0d	adjPvalue_Col_0d_VS_OxSAD2_0d	MeanTPMCol_0d	MeanTPMOxSAD2_0d	Significant
AT1G01030	AP2/B3-like transcriptional factor family protein	14.9394	20.9856	16.4726	1.57171	1.9939	2.31036	-3.11185	1.81943e-44	4.04556e-42	17.4659	1.95866	down
AT1G01070	nodulin MtN21 /EamA-like transporter family protein	0.586848	0.549284	0.535411	2.70393	2.13429	0.604199	1.7399	0.00168868	0.00625605	0.557181	1.81414	up
AT1G01320	Tetratricopeptide repeat (TPR)-like superfamily protein	51.9143	38.5991	34.8425	106.435	97.9499	81.4074	1.23985	1.7541e-14	4.90636e-13	41.7853	95.264	up
AT1G01340	cyclic nucleotide gated channel 10	18.6515	15.4301	18.4571	6.48322	8.73653	6.5837	-1.2295	6.76902e-14	1.77812e-12	17.5129	7.26782	down
AT1G01360	regulatory component of ABA receptor 1	28.2826	35.0892	30.7665	8.05769	8.78068	12.0493	-1.65788	5.45946e-16	1.7964e-14	31.3794	9.62922	down
AT1G01420	UDP-glucosyl transferase 72B3	4.28047	3.35236	3.33146	1.44839	0.941158	1.73258	-1.34642	1.46369e-05	9.41834e-05	3.65476	1.37404	down
AT1G01620	plasma membrane intrinsic protein 1C	97.7593	99.6732	84.3793	210.629	220.777	248.145	1.31587	2.45662e-26	1.95226e-24	93.9373	226.517	up
AT1G01695	Phosphatidylinositol N-acetyglucosaminlytransferase subunit P-related	0.0339944	0.0318184	0.235713	0.473453	0.681977	0.471035	2.4221	0.00893412	0.0262502	0.100508	0.542155	up
AT1G01700	RHO guanyl-nucleotide exchange factor 2	5.64643	4.29051	4.52558	1.14759	2.1992	1.95472	-1.40274	1.46091e-06	1.17454e-05	4.82084	1.76717	down
AT1G01760	adenosine deaminases;RNA binding;RNA binding;adenosine deaminases	1.28194	1.16831	0.964903	2.55058	2.81991	2.91465	1.32891	2.25412e-05	0.000138296	1.13838	2.76172	up
AT1G01830	ARM repeat superfamily protein	3.77614	2.82075	2.83232	8.1994	9.16585	6.42201	1.38066	5.47998e-12	1.12529e-10	3.14307	7.92908	up
AT1G02205	Fatty acid hydroxylase superfamily	7.4738	8.71789	6.77076	66.8593	59.9198	83.7379	3.24347	9.41919e-77	9.01498e-74	7.65415	70.1723	up
AT1G02310	Glycosyl hydrolase superfamily protein	0.85974	0.536472	1.18674	0.158385	0.248423	0.129769	-2.25258	0.000712542	0.00294005	0.860986	0.178859	down
AT1G02350	protoporphyrinogen oxidase-related	1.25562	1.46906	1.26967	2.7064	4.19827	2.3027	1.23384	0.0180322	0.0474359	1.33145	3.06913	up
AT1G02405	proline-rich family protein	11.2541	7.46797	10.1911	2.67362	1.12326	2.19056	-2.20717	4.37629e-09	5.6768e-08	9.63774	1.99581	down
AT1G02730	cellulose synthase-like D5	2.6414	2.08535	1.28405	5.33537	5.01744	7.45103	1.62663	7.15182e-10	1.0659e-08	2.0036	5.93462	up
AT1G02810	Plant invertase/pectin methylesterase inhibitor superfamily	0.417992	0.478178	0.322033	1.27057	1.94109	1.83596	2.09673	1.00056e-07	1.01922e-06	0.406068	1.68254	up
AT1G02900	rapid alkalinization factor 1	10.167	7.36967	11.9923	1.06466	1.95956	3.30227	-2.16445	1.38676e-07	1.37446e-06	9.84299	2.10883	down
AT1G02920	glutathione S-transferase 7	165.702	99.3814	120.354	34.5109	51.8895	32.6436	-1.64959	7.95007e-15	2.3027e-13	128.479	39.6813	down
AT1G02930	glutathione S-transferase 6	402.692	235.533	335.24	70.5169	89.4894	53.3398	-2.1453	1.13226e-23	7.71655e-22	324.488	71.1154	down
AT1G03300	DOMAIN OF UNKNOWN FUNCTION 724 1	0.461736	0.22638	0.228687	1.90298	2.37704	2.8495	3.02471	2.61587e-14	7.16209e-13	0.305601	2.37651	up
AT1G03350	BSD domain-containing protein	53.2338	52.7753	60.4489	18.1791	22.9512	22.7425	-1.34134	5.23393e-20	2.47241e-18	55.486	21.2909	down
AT1G03440	Leucine-rich repeat (LRR) family protein	9.00082	9.07082	7.80131	14.6066	21.5725	20.0829	1.16374	1.31345e-10	2.21385e-09	8.62432	18.754	up
AT1G03470	Kinase interacting (KIP1-like) family protein	4.01079	3.68762	3.59934	9.28643	7.39747	6.19102	1.06231	5.22716e-06	3.72621e-05	3.76592	7.62498	up
AT1G03600	photosystem II family protein	205.926	281.867	180.253	421.175	399.95	568.054	1.10165	5.24132e-08	5.62541e-07	222.682	463.059	up
AT1G03780	targeting protein for XKLP2	0.871617	0.668976	0.423057	1.52609	1.53487	2.6286	1.60015	2.103e-05	0.000129928	0.65455	1.89652	up
AT1G03870	FASCICLIN-like arabinoogalactan 9	52.899	49.6731	52.0762	103.377	95.5613	117.22	1.0779	3.78391e-16	1.26781e-14	51.5494	105.386	up
AT1G03905	P-loop containing nucleoside triphosphate hydrolases superfamily protein	6.05142	5.33729	7.96831	1.89091	2.33462	2.37132	-1.51303	5.55158e-08	5.94103e-07	6.45234	2.19895	down
AT1G04020	breast cancer associated RING 1	1.58799	1.60733	0.86423	2.49822	2.20203	3.71744	1.11202	0.000696347	0.00287917	1.35318	2.8059	up
AT1G04100	indoleacetic acid-induced protein 10	6.49439	7.03674	7.73975	2.66855	2.20292	3.62483	-1.2718	1.40811e-06	1.13708e-05	7.09029	2.8321	down
AT1G04310	ethylene response sensor 2	1.50522	1.14052	1.07166	3.88615	4.19402	4.38166	1.79755	7.9695e-16	2.57029e-14	1.23913	4.15394	up
AT1G04520	plasmodesmata-located protein 2	1.41094	1.92353	0.797551	4.60755	5.43549	9.90019	2.32608	1.42928e-09	2.03248e-08	1.37734	6.64775	up
AT1G04540	Calcium-dependent lipid-binding (CaLB domain) family protein	1.86258	1.60572	1.84801	0.707033	0.327772	0.799019	-1.46894	0.000272967	0.00126715	1.7721	0.611275	down
AT1G04570	Major facilitator superfamily protein	4.02578	3.85373	3.66771	0.591633	0.356907	0.316944	-3.15073	1.77643e-22	1.08024e-20	3.84907	0.421828	down
AT1G04650		0.12879	0.348243	0.235655	0.996501	1.16426	1.06139	2.20507	1.78976e-07	1.73476e-06	0.237563	1.07405	up
AT1G04660	glycine-rich protein	0.0687278	0.0321643	0	0.205114	0.229797	0.728236	3.64611	0.0045704	0.0148785	0.0336307	0.387716	up
AT1G04930	hydroxyproline-rich glycoprotein family protein	3.83237	3.73407	3.43055	1.25	1.40042	1.63864	-1.30687	2.1093e-06	1.63435e-05	3.66566	1.42968	down
AT1G05065	CLAVATA3/ESR-RELATED 20	6.49859	10.6857	9.13386	0.698907	2.93629	5.58314	-1.46194	0.0172385	0.0456919	8.77271	3.07278	down
AT1G05090	dentin sialophosphoprotein-related	3.19278	4.37519	4.01528	1.37013	1.79085	1.59883	-1.24778	8.13686e-07	6.89706e-06	3.86108	1.5866	down
AT1G05135		40.6783	71.2604	61.2286	25.5793	26.232	24.1232	-1.15525	5.29742e-08	5.68286e-07	57.7225	25.3115	down
AT1G05320		4.67369	4.0522	3.93714	12.2354	9.32128	8.91534	1.31513	6.53439e-13	1.52213e-11	4.22101	10.1573	up
AT1G05370	Sec14p-like phosphatidylinositol transfer family protein	0.239247	0.251924	0.362886	0.654517	0.76661	0.828766	1.43252	0.0105391	0.0302552	0.284686	0.749964	up
AT1G05400		1.19984	0.998255	1.50213	0.176832	0.396222	0.688191	-1.49125	0.0170356	0.0452195	1.23341	0.420415	down
AT1G05420	ovate family protein 12	8.51417	11.9842	6.92886	0.646566	0.144874	0.900568	-3.91864	6.29514e-17	2.29809e-15	9.14241	0.564003	down
AT1G05460	P-loop containing nucleoside triphosphate hydrolases superfamily protein	2.21631	2.01307	1.68225	4.29222	4.54564	4.27564	1.19748	1.82179e-11	3.49635e-10	1.97055	4.37117	up
AT1G05950		0.581245	0.50374	0.653053	1.54195	0.815763	1.5441	1.21947	0.00309585	0.0106416	0.579346	1.3006	up
AT1G06000	UDP-Glycosyltransferase superfamily protein	69.1103	61.8673	60.9638	28.7992	30.1511	32.4386	-1.02355	3.38937e-19	1.50149e-17	63.9804	30.463	down
AT1G06080	delta 9 desaturase 1	0.97954	1.05267	0.188667	2.45419	2.78996	9.07807	2.76109	5.40873e-06	3.84072e-05	0.740291	4.77407	up
AT1G06250	alpha/beta-Hydrolases superfamily protein	1.0749	0.384685	0.712441	1.9814	2.07889	1.52033	1.41399	0.00119228	0.00462104	0.724009	1.86021	up
AT1G06620	2-oxoglutarate (2OG) and Fe(II)-dependent oxygenase superfamily protein	161.73	115.529	152.439	47.8481	50.3987	29.0672	-1.7126	2.4503e-16	8.34959e-15	143.233	42.438	down
AT1G06640	2-oxoglutarate (2OG) and Fe(II)-dependent oxygenase superfamily protein	463.973	463.241	459.073	135.719	151.527	149.525	-1.62332	2.29553e-59	9.90814e-57	462.096	145.59	down
AT1G07090	Protein of unknown function (DUF640)	31.4002	43.7999	43.2846	5.55642	6.06813	7.19219	-2.61358	4.39194e-35	5.75475e-33	39.4949	6.27224	down
AT1G07135	glycine-rich protein	159.447	113.416	186.308	419.198	392.211	265.984	1.27162	3.52671e-09	4.6515e-08	153.057	359.131	up
AT1G07180	alternative NAD(P)H dehydrogenase 1	6.80743	5.14369	3.04666	1.45293	2.40027	3.20807	-1.02627	0.00342479	0.0116129	4.99926	2.35376	down
AT1G07290	golgi nucleotide sugar transporter 2	1.72444	1.11191	0.896779	0.228733	0.170839	0.187406	-2.60796	2.9331e-05	0.000174033	1.24438	0.195659	down
AT1G07430	highly ABA-induced PP2C gene 2	6.18724	3.3516	6.0383	1.26011	1.54749	0.833891	-2.06331	2.75873e-10	4.41336e-09	5.19238	1.21383	down
AT1G07490	ROTUNDIFOLIA like 3	0.896245	0.58076	0.597542	1.64602	1.2294	3.37156	1.66155	0.00647918	0.0200093	0.691516	2.08233	up
AT1G07520	GRAS family transcription factor	11.3909	8.49986	8.69224	23.5081	23.4107	14.9001	1.15921	9.71958e-09	1.19931e-07	9.52767	20.6063	up
AT1G07620	GTP-binding protein Obg/CgtA	8.3649	5.71067	9.94091	2.3163	3.60421	1.49364	-1.66732	1.30023e-07	1.29569e-06	8.0055	2.47138	down
AT1G07630	pol-like 5	34.9387	31.5495	35.3405	16.4551	17.3161	11.9068	-1.11657	6.12082e-12	1.24757e-10	33.9429	15.226	down
AT1G07725	exocyst subunit exo70 family protein H6	9.3105	9.68654	10.8941	3.68707	4.47	3.57546	-1.31333	2.75598e-14	7.52698e-13	9.96372	3.91085	down
AT1G07728	other RNA	11.7264	10.9758	12.0097	4.02823	4.64341	4.52139	-1.35265	2.94558e-17	1.10274e-15	11.5706	4.39767	down
AT1G07747	Bifunctional inhibitor/lipid-transfer protein/seed storage 2S albumin superfamily protein	0.461049	0.719229	2.26444	0	0	0	-5.37592	0.00245117	0.00868603	1.14824	0	down
AT1G07750	RmlC-like cupins superfamily protein	31.3957	28.4485	44.141	14.6978	20.5133	13.4455	-1.06311	1.48851e-06	1.19412e-05	34.6617	16.2189	down
AT1G08090	nitrate transporter 2:1	0.652263	0.719531	0.565338	0.208568	0.285593	0.189872	-1.47055	0.00662619	0.0203788	0.645711	0.228011	down
AT1G08250	arogenate dehydratase 6	34.7959	33.6294	40.0348	5.97239	4.74521	5.4176	-2.70357	2.00121e-57	8.00958e-55	36.1534	5.3784	down
AT1G08560	syntaxin of plants 111	4.64533	4.55668	3.31764	7.02428	8.73935	12.9945	1.25292	6.33784e-06	4.43186e-05	4.17322	9.58605	up
AT1G08650	phosphoenolpyruvate carboxylase kinase 1	92.0597	104.623	116.732	36.8953	38.3954	45.4879	-1.33495	4.36979e-17	1.6194e-15	104.471	40.2595	down
AT1G08730	Myosin family protein with Dil domain	0.121416	0.0437092	0.024285	0.362358	0.0728651	0.2436	1.9365	0.0171648	0.045524	0.0631366	0.226274	up
AT1G08770	prenylated RAB acceptor 1.E	22.7188	26.6286	31.0446	13.5402	13.2306	11.8445	-1.02158	8.14006e-08	8.46021e-07	26.7973	12.8718	down
AT1G08800	Protein of unknown function, DUF593	14.2247	14.4052	18.9987	7.22578	7.12099	4.83824	-1.27621	2.68358e-10	4.30252e-09	15.8762	6.395	down
AT1G08940	Phosphoglycerate mutase family protein	15.8524	12.6143	18.992	6.12481	7.45618	7.34949	-1.14007	2.75349e-07	2.56073e-06	15.8196	6.97683	down
AT1G09080	Heat shock protein 70 (Hsp 70) family protein	1.63154	0.4503	1.01526	0.520216	0.186502	0.323931	-1.51627	0.00904663	0.0265454	1.03236	0.34355	down
AT1G09310	Protein of unknown function, DUF538	449.037	453.647	427.372	1057.55	1008.09	982.604	1.24075	2.30182e-36	3.20696e-34	443.352	1016.08	up
AT1G09320	agenet domain-containing protein	6.31669	4.33162	5.36082	1.94191	1.98003	2.50277	-1.26258	6.40628e-08	6.77012e-07	5.33638	2.14157	down
AT1G09340	chloroplast RNA binding	241.058	311.28	236.157	510.267	465.784	633.773	1.07415	5.03879e-10	7.7027e-09	262.832	536.608	up
AT1G09350	galactinol synthase 3	1.87113	3.98036	2.86021	1.04917	0.379167	1.1369	-1.70868	0.000325165	0.00147311	2.9039	0.855077	down
AT1G09450	Protein kinase superfamily protein	0	0.0592952	0.146421	0.588202	0.611914	0.550774	3.07777	0.000100788	0.000526218	0.068572	0.58363	up
AT1G09480	NAD(P)-binding Rossmann-fold superfamily protein	0.757615	0.597154	0.518408	0.158671	0.222206	0.130003	-1.84316	0.0144566	0.0393414	0.624393	0.170293	down
AT1G09486		1.63173	2.0682	1.17856	0.473453	0.757752	0.471035	-1.48741	0.00115972	0.00451121	1.62616	0.567413	down
AT1G09500	NAD(P)-binding Rossmann-fold superfamily protein	2.62935	2.10214	3.67954	1.98903	1.12945	0.692046	-1.10716	0.0085482	0.0252749	2.80368	1.27018	down
AT1G09750	Eukaryotic aspartyl protease family protein	18.2596	21.5539	8.92201	49.4164	40.6391	66.8932	1.74222	1.0093e-09	1.47333e-08	16.2452	52.3163	up
AT1G09970	Leucine-rich receptor-like protein kinase family protein	712.395	625.724	726.214	282.027	306.243	212.701	-1.32453	1.50207e-18	6.32221e-17	688.111	266.99	down
AT1G10070	branched-chain amino acid transaminase 2	8.70354	7.6497	9.08458	3.69566	4.02208	3.28747	-1.17008	5.52949e-10	8.41193e-09	8.47927	3.66841	down
AT1G10140	Uncharacterised conserved protein UCP031279	12.739	13.1991	7.90868	5.65862	3.566	4.49135	-1.2475	1.87433e-05	0.000117549	11.2823	4.57199	down
AT1G10210	mitogen-activated protein kinase 1	5.75555	5.89914	5.5451	2.57893	2.46516	3.121	-1.02436	6.29363e-07	5.45225e-06	5.73327	2.7217	down
AT1G10330	Tetratricopeptide repeat (TPR)-like superfamily protein	1.29251	1.56386	1.66673	0.627224	0.808107	0.488204	-1.21052	0.00396566	0.013145	1.5077	0.641178	down
AT1G10370	Glutathione S-transferase family protein	108.581	161.921	189.02	7.96405	10.3069	11.2877	-3.9241	9.08331e-65	4.99877e-62	153.174	9.8529	down
AT1G10410	Protein of unknown function (DUF1336)	58.748	68.9629	81.3202	14.5888	17.3334	14.6292	-2.13162	6.67341e-37	9.47753e-35	69.677	15.5171	down
AT1G10550	xyloglucan:xyloglucosyl transferase 33	1.28472	1.12491	1.00575	2.51489	4.11081	3.85078	1.66339	2.34654e-06	1.80231e-05	1.13846	3.49216	up
AT1G10585	basic helix-loop-helix (bHLH) DNA-binding superfamily protein	19.833	13.1741	23.2895	9.48897	8.16759	8.95967	-1.03576	2.62077e-05	0.00015754	18.7655	8.87208	down
AT1G10640	Pectin lyase-like superfamily protein	0.0493705	0.392788	0.128373	1.22786	0.990445	2.43456	3.06599	3.03408e-06	2.27794e-05	0.190177	1.55095	up
AT1G10690		5.8692	8.14333	6.46352	0.618222	1.0774	1.35073	-2.6955	1.62526e-11	3.13832e-10	6.82535	1.01545	down
AT1G10720	BSD domain-containing protein	30.0644	30.7821	31.2599	10.6874	11.8513	13.6038	-1.30467	8.60081e-19	3.6763e-17	30.7021	12.0475	down
AT1G10740	alpha/beta-Hydrolases superfamily protein	6.19285	6.18004	5.52542	12.6839	12.4593	11.7654	1.08898	1.02056e-13	2.62142e-12	5.9661	12.3029	up
AT1G10850	Leucine-rich repeat protein kinase family protein	2.01698	1.90298	1.34261	3.41911	4.29814	5.74739	1.40868	7.42751e-08	7.771e-07	1.75419	4.48821	up
AT1G10930	DNA helicase (RECQl4A)	2.10227	2.21102	1.39107	4.36263	3.60273	3.97054	1.11691	3.1546e-07	2.88501e-06	1.90145	3.97863	up
AT1G10990		2.72373	2.32176	2.10781	0.290315	0.325251	1.70468	-1.54071	0.0169209	0.044953	2.38444	0.773414	down
AT1G11050	Protein kinase superfamily protein	27.4447	20.2418	25.5356	62.4964	60.1381	41.1978	1.20623	5.95406e-11	1.05614e-09	24.4074	54.6108	up
AT1G11130	Leucine-rich repeat protein kinase family protein	5.28278	5.04613	2.84662	8.16818	9.15111	8.23289	1.00667	6.30813e-06	4.41529e-05	4.39184	8.51739	up
AT1G11160	Transducin/WD40 repeat-like superfamily protein	0.325105	0.32603	0.34216	0.924053	0.685853	0.615142	1.2051	0.000911415	0.00365979	0.331098	0.741683	up
AT1G11175	other RNA	14.0325	16.0934	17.5947	4.63485	5.00715	4.7016	-1.69647	2.69691e-15	8.26784e-14	15.9069	4.7812	down
AT1G11300	protein serine/threonine kinases;protein kinases;ATP binding;sugar binding;kinases;carbohydrate binding	1.10999	0.998352	0.774159	1.85476	2.11661	2.37489	1.19062	6.19494e-08	6.55936e-07	0.960833	2.11542	up
AT1G11362	Plant invertase/pectin methylesterase inhibitor superfamily protein	0.901965	0.603021	0.670082	0.128184	0.0718045	0	-3.45976	0.00407507	0.013459	0.725023	0.0666627	down
AT1G11390	Protein kinase superfamily protein	19.1761	22.204	20.837	9.60871	9.9172	10.3815	-1.01469	2.83444e-13	6.97925e-12	20.739	9.96913	down
AT1G11410	S-locus lectin protein kinase family protein	4.08662	3.36233	2.97072	9.21276	8.06244	6.25885	1.22372	1.63277e-09	2.29516e-08	3.47322	7.84469	up
AT1G11580	methylesterase PCR A	144.296	104.982	128.603	34.6663	39.916	27.5183	-1.8445	4.9068e-29	4.57684e-27	125.96	34.0335	down
AT1G11740	ankyrin repeat family protein	0.0402736	0.131935	0.157079	0.360582	0.359088	0.492389	1.90294	0.00781982	0.0234488	0.109763	0.40402	up
AT1G11785		6.07319	7.75152	9.17184	3.38701	4.20482	1.42503	-1.33563	0.00174677	0.00644298	7.66552	3.00562	down
AT1G12030	Protein of unknown function (DUF506)	1.51395	2.58401	0.771876	0.753047	0.19851	0.508109	-1.67345	0.0104761	0.030098	1.62328	0.486555	down
AT1G12090	extensin-like protein	580.424	598.838	420.675	1230.57	1080.93	1345.92	1.24242	1.08155e-14	3.10001e-13	533.313	1219.14	up
AT1G12244	Polynucleotidyl transferase, ribonuclease H-like superfamily protein	4.90785	5.47872	4.566	8.4658	9.73546	11.8907	1.056	3.29858e-06	2.45061e-05	4.98419	10.0306	up
AT1G12300	Tetratricopeptide repeat (TPR)-like superfamily protein	0.463008	0.460457	0.188112	0.892425	0.790178	1.13216	1.40445	0.00101924	0.00403907	0.370526	0.938253	up
AT1G12320	Protein of unknown function (DUF1442)	16.157	20.2951	16.6039	1.8848	2.17027	5.23334	-2.45408	3.0082e-12	6.43532e-11	17.6853	3.09614	down
AT1G12420	ACT domain repeat 8	30.3965	29.0974	32.8288	10.4272	12.6377	11.5139	-1.3763	1.76976e-23	1.18774e-21	30.7742	11.5263	down
AT1G12540	basic helix-loop-helix (bHLH) DNA-binding superfamily protein	0.177043	0.331421	0.882331	0	0	0	-5.86301	0.000373152	0.00166245	0.463598	0	down
AT1G12610	Integrase-type DNA-binding superfamily protein	118.894	92.2284	97.5129	420.55	386.002	259.114	1.83431	1.43707e-23	9.67407e-22	102.878	355.222	up
AT1G12680	phosphoenolpyruvate carboxylase-related kinase 2	19.417	19.4172	19.6872	6.30968	6.99241	9.87276	-1.28827	2.57396e-11	4.80581e-10	19.5071	7.72495	down
AT1G12820	auxin signaling F-box 3	18.7646	20.6116	18.7767	5.21499	5.48845	9.22528	-1.49573	4.76526e-11	8.56307e-10	19.3843	6.64291	down
AT1G12970	plant intracellular ras group-related LRR 3	10.4778	10.2368	9.69003	4.29834	4.57481	4.29211	-1.16396	1.0821e-12	2.46332e-11	10.1349	4.38842	down
AT1G12980	Integrase-type DNA-binding superfamily protein	0.106396	0.0995855	0.922169	0	0	0	-5.88778	0.000906381	0.00364157	0.37605	0	down
AT1G13110	cytochrome P450, family 71 subfamily B, polypeptide 7	99.5421	93.218	100.362	22.104	20.179	23.5123	-2.10909	2.67817e-65	1.51165e-62	97.7075	21.9318	down
AT1G13245	ROTUNDIFOLIA like 17	29.2778	31.9829	27.43	4.18258	2.55594	8.53605	-2.47249	2.17378e-12	4.75187e-11	29.5636	5.09152	down
AT1G13280	allene oxide cyclase 4	66.8484	63.261	65.5939	30.4858	30.6252	30.8278	-1.04552	1.14144e-21	6.36113e-20	65.2344	30.6463	down
AT1G13310	Endosomal targeting BRO1-like domain-containing protein	0.409238	0.147324	0.272846	0	0.0350851	0	-4.60748	0.00366568	0.012307	0.27647	0.011695	down
AT1G13360		190.694	193.52	234.718	73.8708	86.8666	71.2659	-1.37795	4.32371e-21	2.26076e-19	206.311	77.3344	down
AT1G13390		96.8889	80.9769	108.425	50.5849	49.8783	33.4217	-1.05658	2.2159e-08	2.55653e-07	95.4302	44.6283	down
AT1G13420	sulfotransferase 4B	2.07985	1.36612	3.35235	0.471892	0.610012	0.416373	-2.15746	1.18628e-05	7.80677e-05	2.26611	0.499426	down
AT1G13470	Protein of unknown function (DUF1262)	52.5422	30.4519	51.8433	13.2232	13.1468	8.67859	-1.90096	1.2939e-15	4.08644e-14	44.9458	11.6829	down
AT1G13540	Protein of unknown function (DUF1262)	0.352956	0.198218	0.275327	0	0	0.0287685	-4.44308	0.00549563	0.0174155	0.2755	0.0095895	down
AT1G13550	Protein of unknown function (DUF1262)	0.313658	0.130481	1.08743	0	0.116527	0	-3.82121	0.00575227	0.0181177	0.510524	0.0388423	down
AT1G13630	Tetratricopeptide repeat (TPR)-like superfamily protein	1.85436	2.13152	2.10069	0.582551	1.01524	0.808753	-1.30493	9.24394e-06	6.24001e-05	2.02886	0.802181	down
AT1G13650		2.81726	3.43495	1.5422	4.72025	5.74273	10.2124	1.46348	8.98781e-05	0.000475598	2.59814	6.89179	up
AT1G13900	Purple acid phosphatases superfamily protein	22.4322	20.7314	24.6754	9.7409	10.4925	9.88776	-1.12993	1.31938e-16	4.69202e-15	22.613	10.0404	down
AT1G13960	WRKY DNA-binding protein 4	25.5244	22.8388	24.031	10.1294	12.1663	11.1031	-1.07298	1.22227e-16	4.35369e-15	24.1314	11.1329	down
AT1G13990		130.809	119.081	161.966	79.6086	73.209	46.9739	-1.00513	1.47272e-06	1.18318e-05	137.285	66.5972	down
AT1G14120	2-oxoglutarate (2OG) and Fe(II)-dependent oxygenase superfamily protein	0.855459	0.139252	2.22436	0.222006	0	0	-3.83206	0.00187802	0.00686612	1.07302	0.0740019	down
AT1G14200	RING/U-box superfamily protein	6.98853	4.91857	3.99117	1.77849	2.5963	2.91432	-1.06685	0.0016568	0.00614922	5.29943	2.4297	down
AT1G14250	GDA1/CD39 nucleoside phosphatase family protein	453.372	479.738	385.305	51.0914	37.0908	55.2861	-3.15009	8.66234e-73	6.57532e-70	439.472	47.8228	down
AT1G14260	RING/FYVE/PHD zinc finger superfamily protein	2.81171	1.86291	3.34061	0.471425	0.774627	0.746749	-1.96611	8.25579e-07	6.98711e-06	2.67174	0.664267	down
AT1G14345	NAD(P)-linked oxidoreductase superfamily protein	32.4932	27.4365	17.4123	102.933	91.3928	132.638	2.13668	1.30248e-21	7.22203e-20	25.7807	108.988	up
AT1G14360	UDP-galactose transporter 3	51.6587	46.412	41.0984	19.446	21.4307	23.444	-1.0648	1.03133e-14	2.95993e-13	46.3897	21.4402	down
AT1G14380	IQ-domain 28	5.39632	4.82982	4.09449	10.3571	10.0846	11.1219	1.19061	6.64262e-14	1.74909e-12	4.77354	10.5212	up
AT1G14480	Ankyrin repeat family protein	22.2441	12.6998	19.8961	48.1343	53.1023	33.2935	1.3395	3.23881e-09	4.30271e-08	18.28	44.8434	up
AT1G14700	purple acid phosphatase 3	5.20922	5.04163	5.62072	15.4056	18.1284	19.4676	1.78193	2.01499e-23	1.33603e-21	5.29053	17.6672	up
AT1G14780	MAC/Perforin domain-containing protein	10.2932	11.7123	12.6824	0.943667	2.27191	1.28313	-2.92331	3.00843e-26	2.37364e-24	11.5626	1.49957	down
AT1G14840	microtubule-associated proteins 70-4	5.5417	5.71591	4.06058	9.77462	11.3978	12.7929	1.1976	1.63286e-10	2.70054e-09	5.10606	11.3218	up
AT1G14870	PLANT CADMIUM RESISTANCE 2	94.0241	66.3961	83.3601	23.8006	27.7979	23.7417	-1.64932	3.37398e-25	2.54355e-23	81.2601	25.1134	down
AT1G14880	PLANT CADMIUM RESISTANCE 1	70.7014	28.8639	42.2235	18.0153	20.8926	18.5802	-1.24623	2.71844e-06	2.06206e-05	47.2629	19.1627	down
AT1G14900	high mobility group A	2.67723	3.35462	2.28302	4.98303	5.6308	6.79279	1.11389	6.13977e-05	0.000340012	2.77162	5.80221	up
AT1G15100	RING-H2 finger A2A	33.736	37.5937	37.2774	6.62165	6.97463	9.8304	-2.16323	2.24361e-26	1.79595e-24	36.2024	7.80889	down
AT1G15125	S-adenosyl-L-methionine-dependent methyltransferases superfamily protein	11.149	12.9853	7.15659	2.29329	3.92395	1.40067	-2.01004	1.96818e-08	2.29971e-07	10.4303	2.5393	down
AT1G15160	MATE efflux family protein	2.60001	1.27339	1.04815	4.15047	6.06512	3.89342	1.57685	8.57671e-06	5.82534e-05	1.64052	4.703	up
AT1G15175	other RNA	3.20343	3.698	2.17494	4.88644	6.01001	6.87571	1.02035	0.000878677	0.0035419	3.02545	5.92405	up
AT1G15190	Fasciclin-like arabinogalactan family protein	2.30925	2.88192	3.90294	1.11035	1.80161	1.28618	-1.09097	0.00329029	0.0112259	3.03137	1.39938	down
AT1G15260		4.07807	7.53229	5.3726	14.5508	9.87806	15.4673	1.27471	1.80349e-05	0.000113364	5.66098	13.2987	up
AT1G15290	Tetratricopeptide repeat (TPR)-like superfamily protein	11.562	9.03435	7.29963	27.2488	24.2094	21.0985	1.43096	1.46094e-16	5.13733e-15	9.29865	24.1856	up
AT1G15530	Concanavalin A-like lectin protein kinase family protein	15.023	15.1544	17.7506	5.33914	6.8576	6.31462	-1.33376	3.3118e-15	1.00555e-13	15.976	6.17045	down
AT1G15550	gibberellin 3-oxidase 1	0.176197	0	0	0.280453	0.196376	1.00529	3.21384	0.0136488	0.0375329	0.0587323	0.494041	up
AT1G15580	indole-3-acetic acid inducible 5	8.38698	9.03754	9.22404	0.911472	1.41391	1.72336	-2.66511	5.18226e-15	1.5395e-13	8.88285	1.34958	down
AT1G15670	Galactose oxidase/kelch repeat superfamily protein	12.1652	12.4363	14.283	1.45912	2.1155	1.80496	-2.81764	2.16738e-39	3.64202e-37	12.9615	1.79319	down
AT1G15720	TRF-like 5	4.14755	5.46889	5.03799	1.44562	1.24843	2.51691	-1.43673	1.01309e-05	6.7867e-05	4.88481	1.73698	down
AT1G15885		7.99385	6.45829	8.53304	19.6717	18.8503	13.4427	1.21566	9.74415e-07	8.13108e-06	7.66173	17.3216	up
AT1G15890	Disease resistance protein (CC-NBS-LRR class) family	4.94831	4.27529	4.96188	13.7834	14.1863	4.91434	1.25088	9.03014e-05	0.000477409	4.72849	10.9613	up
AT1G15980	NDH-dependent cyclic electron flow 1	92.45	119.336	91.6676	207.278	178.544	207.769	1.01171	7.60621e-11	1.33415e-09	101.151	197.864	up
AT1G16090	wall associated kinase-like 7	14.3594	3.98464	5.91539	3.69727	4.40578	3.30464	-1.02531	0.00848589	0.0251143	8.08647	3.80256	down
AT1G16120	wall associated kinase-like 1	0.121096	0.264471	0.332368	0.742887	0.697319	0.575764	1.50936	0.00534452	0.0170185	0.239312	0.67199	up
AT1G16220	Protein phosphatase 2C family protein	1.49935	1.01043	0.727738	1.73022	2.17238	2.54192	1.05481	0.00461378	0.0149975	1.07917	2.14817	up
AT1G16330	cyclin b3;1	0.363724	0.276609	0.275845	0.836749	0.684079	1.14879	1.60385	0.000884776	0.00356192	0.305393	0.889873	up
AT1G16380	Cation/hydrogen exchanger family protein	0.563113	0.245965	0.422993	0.0560192	0.104601	0.0611971	-2.44236	0.00102591	0.00406174	0.41069	0.073939	down
AT1G16390	organic cation/carnitine transporter 3	1.03794	0.462619	0.428389	1.89302	2.47888	1.65171	1.70204	3.46415e-05	0.000202379	0.642982	2.00787	up
AT1G16400	cytochrome P450, family 79, subfamily F, polypeptide 2	3.62947	3.39715	3.28877	9.23762	9.64004	2.68935	1.10114	0.00377996	0.0126207	3.43846	7.189	up
AT1G16420	metacaspase 8	4.43269	0.712133	2.26503	0.0658163	0.663628	0.350511	-2.73466	0.000146891	0.00073256	2.46995	0.359985	down
AT1G16500		26.116	29.1024	25.1168	0.700993	2.11062	2.90759	-3.7597	2.35983e-28	2.11166e-26	26.7784	1.9064	down
AT1G16510	SAUR-like auxin-responsive protein family	4.82198	4.03824	2.94756	0.605933	1.24456	1.07565	-1.96449	1.15651e-06	9.48519e-06	3.93592	0.97538	down
AT1G16630		0.193138	0.482066	0.167399	0.576407	1.00453	1.62669	1.9736	0.000327336	0.00148143	0.280868	1.06921	up
AT1G16635		0	0	0	0.203377	0.227851	0.249947	4.74018	0.013308	0.0367472	0	0.227058	up
AT1G16916		4.8544	9.08734	4.53747	2.55665	2.22779	3.4912	-1.10729	0.0101089	0.0291955	6.15973	2.75854	down
AT1G17020	senescence-related gene 1	1.2321	0.5914	1.28696	0.219998	0.422524	0.309	-1.67347	0.00361466	0.0121666	1.03682	0.317174	down
AT1G17070	GC-rich sequence DNA-binding factor-like protein with Tuftelin interacting domain	9.50403	11.146	10.8947	4.54277	4.10032	5.5238	-1.10911	1.58845e-09	2.24001e-08	10.5149	4.7223	down
AT1G17090		1.33315	2.69529	2.1261	5.1458	3.566	3.95529	1.07739	0.00415566	0.0136985	2.05151	4.22236	up
AT1G17100	SOUL heme-binding family protein	56.9413	60.9817	42.8259	111.89	95.8436	105.812	1.01249	2.32902e-10	3.77531e-09	53.583	104.515	up
AT1G17140	interactor of constitutive active rops 1	12.9205	13.0897	10.1223	22.7068	22.6383	26.388	1.03837	8.68686e-11	1.51165e-09	12.0441	23.911	up
AT1G17147	VQ motif-containing protein	11.0078	5.36627	10.5347	3.65025	3.49312	2.30536	-1.47001	6.12376e-05	0.000339382	8.9696	3.14957	down
AT1G17180	glutathione S-transferase TAU 25	5.57778	5.12406	1.43243	0.667917	1.95707	1.93639	-1.35452	0.0140286	0.038376	4.04476	1.52046	down
AT1G17230	Leucine-rich receptor-like protein kinase family protein	19.8103	17.1293	18.3178	8.13659	9.1433	8.97606	-1.02843	1.19098e-17	4.64019e-16	18.4191	8.75198	down
AT1G17232		24.2011	19.7194	20.3516	9.38662	9.19162	10.3912	-1.09914	1.48586e-12	3.31726e-11	21.4241	9.65648	down
AT1G17410	Nucleoside diphosphate kinase family protein	32.0184	27.3735	36.2763	15.1975	15.0438	12.6649	-1.11714	3.00414e-10	4.77269e-09	31.8894	14.3021	down
AT1G17744		47.0297	31.587	41.7372	9.12473	10.9461	8.28719	-2.04298	1.26382e-27	1.08673e-25	40.118	9.45266	down
AT1G17745	D-3-phosphoglycerate dehydrogenase	54.2756	32.317	46.0347	9.17937	12.3115	6.83298	-2.18516	9.46812e-22	5.31688e-20	44.2091	9.44129	down
AT1G17850	Rhodanese/Cell cycle control phosphatase superfamily protein	6.91092	7.41617	6.02808	12.3489	14.1538	17.0781	1.1451	1.89971e-10	3.10917e-09	6.78506	14.5269	up
AT1G17970	RING/U-box superfamily protein	6.76409	5.20253	5.7607	12.4633	10.9804	13.064	1.09303	9.48525e-10	1.38921e-08	5.90911	12.1692	up
AT1G17990	FMN-linked oxidoreductases superfamily protein	1.12674	0.648996	0.8013	1.00593	4.70113	1.2245	1.45673	0.00985176	0.0285652	0.859012	2.31052	up
AT1G18075	MIR159/MIR159B; miRNA	11.4221	15.591	9.07493	2.84072	2.65213	6.20657	-1.55463	0.00181779	0.00667027	12.0294	3.89981	down
AT1G18200	RAB GTPase homolog A6B	75.586	68.4625	85.0092	32.5582	34.5655	27.2261	-1.24049	7.6563e-16	2.48215e-14	76.3526	31.45	down
AT1G18265	Protein of unknown function, DUF593	2.12383	1.90837	1.47264	6.04266	4.9235	2.87359	1.37568	0.000111165	0.000574161	1.83495	4.61325	up
AT1G18300	nudix hydrolase homolog 4	193.376	118.059	165.552	509.769	515.206	277.868	1.49534	2.28837e-10	3.71214e-09	158.995	434.281	up
AT1G18360	alpha/beta-Hydrolases superfamily protein	10.1061	13.0498	9.99756	21.0549	19.2542	24.2805	1.00697	2.36425e-08	2.71347e-07	11.0512	21.5299	up
AT1G18370	ATP binding microtubule motor family protein	0.908494	0.876915	0.455228	0.903782	1.72448	3.12394	1.41892	0.00149563	0.00563177	0.746879	1.9174	up
AT1G18480	Calcineurin-like metallo-phosphoesterase superfamily protein	26.5115	27.0376	25.8159	10.9838	13.1641	12.5048	-1.07205	6.42466e-15	1.89579e-13	26.455	12.2176	down
AT1G18560	BED zinc finger ;hAT family dimerisation domain	5.56535	5.32236	5.81987	1.78532	2.4721	2.85976	-1.1849	1.55866e-07	1.52968e-06	5.56919	2.37239	down
AT1G18570	myb domain protein 51	13.7545	6.78771	9.97325	38.8134	45.2735	26.5224	1.9066	2.83515e-14	7.73359e-13	10.1718	36.8698	up
AT1G18650	plasmodesmata callose-binding protein 3	6.2076	6.66053	4.19928	10.9952	13.5558	17.4003	1.34904	1.97124e-07	1.89571e-06	5.68914	13.9838	up
AT1G18830	Transducin/WD40 repeat-like superfamily protein	0	0	0.0395487	0.31775	0.101711	0.0743829	3.61365	0.00943426	0.0274995	0.0131829	0.164615	up
AT1G18910	zinc ion binding;zinc ion binding	4.00786	3.52705	4.30442	1.87436	2.13632	1.63335	-1.03158	4.23046e-08	4.62848e-07	3.94644	1.88134	down
AT1G19050	response regulator 7	84.024	114.837	130.774	16.4776	20.1109	36.8357	-2.12583	8.52712e-14	2.20832e-12	109.878	24.4747	down
AT1G19150	photosystem I light harvesting complex gene 6	56.652	81.8621	60.2835	131.798	122.118	153.745	1.07834	3.34982e-09	4.4368e-08	66.2659	135.887	up
AT1G19250	flavin-dependent monooxygenase 1	2.94226	0.261148	0.70349	0.151396	0.367499	0.0413475	-2.76096	0.00160699	0.00599166	1.3023	0.186748	down
AT1G19300	Nucleotide-diphospho-sugar transferases superfamily protein	154.256	103.282	137.441	73.2884	65.1009	40.8795	-1.09377	4.61869e-07	4.10793e-06	131.66	59.7563	down
AT1G19310	RING/U-box superfamily protein	100.592	99.9019	109.176	36.3204	36.6314	35.1091	-1.47704	1.99902e-35	2.6832e-33	103.224	36.0203	down
AT1G19340	Methyltransferase MT-A70 family protein	2.25427	3.03631	1.93002	7.11061	6.12791	6.65496	1.5084	3.30553e-10	5.20491e-09	2.40687	6.63116	up
AT1G19350	Brassinosteroid signalling positive regulator (BZR1) family protein	68.3207	73.9657	60.4701	131.493	121.812	140.15	1.00259	1.37459e-14	3.88043e-13	67.5855	131.152	up
AT1G19380	Protein of unknown function (DUF1195)	927.252	985.817	1158.63	497.87	505.319	378.342	-1.11475	2.76112e-12	5.96472e-11	1023.9	460.511	down
AT1G19396		4.8352	3.22021	5.56091	1.01753	1.45087	1.21263	-1.8502	7.31641e-05	0.000396397	4.53877	1.22701	down
AT1G19397		5.15486	3.43843	4.21111	1.17888	1.12263	1.73859	-1.59935	2.76358e-05	0.000164953	4.26814	1.3467	down
AT1G19480	DNA glycosylase superfamily protein	4.65074	4.7526	4.77094	2.05628	2.2286	1.99607	-1.13408	3.29758e-08	3.6885e-07	4.72476	2.09365	down
AT1G19540	NmrA-like negative transcriptional regulator family protein	3.05246	1.81463	3.53948	0.738639	0.551683	1.27761	-1.6449	0.000359513	0.00160886	2.80219	0.855978	down
AT1G19550	Glutathione S-transferase family protein	9.10122	7.17361	12.4553	2.85916	4.37774	5.07559	-1.17997	0.00101139	0.00401219	9.5767	4.10416	down
AT1G19570	dehydroascorbate reductase	3455.76	3423.08	3748.08	967.244	1060.13	917	-1.81081	7.43576e-60	3.27367e-57	3542.31	981.458	down
AT1G19610	Arabidopsis defensin-like protein	5.59503	3.36657	1.81852	1.19272	1.55895	0.97722	-1.47988	0.00920958	0.0269266	3.59338	1.24296	down
AT1G19640	jasmonic acid carboxyl methyltransferase	66.8228	45.4165	47.0776	17.1525	27.0087	20.3195	-1.25875	8.06971e-11	1.41095e-09	53.1056	21.4936	down
AT1G19670	chlorophyllase 1	871.359	836.475	857.864	250.541	279.342	306.967	-1.57225	1.14849e-41	2.23732e-39	855.233	278.95	down
AT1G19770	purine permease 14	203.168	164.048	194.806	628.169	603.97	360.55	1.54575	7.62236e-15	2.2181e-13	187.341	530.897	up
AT1G19950	HVA22-like protein H (ATHVA22H)	2.09363	1.95962	1.81462	4.49098	3.24489	5.54601	1.23395	2.92278e-05	0.000173561	1.95596	4.42729	up
AT1G19960		23.9528	20.1777	22.7465	59.7787	49.3297	45.2432	1.2519	4.30261e-12	8.97757e-11	22.2923	51.4505	up
AT1G19968	other RNA	0	0	0	0.182198	1.02061	0	5.26548	0.0171052	0.0453712	0	0.400937	up
AT1G20010	tubulin beta-5 chain	58.3067	56.2179	51.8764	118.407	110.284	122.111	1.12266	4.91563e-24	3.45712e-22	55.467	116.934	up
AT1G20065		4.48393	5.07691	2.6327	0.431678	0.40302	0.294736	-3.39649	1.77511e-09	2.48099e-08	4.06451	0.376478	down
AT1G20070		67.6227	78.6529	76.2423	14.071	15.1886	17.8759	-2.19556	1.24698e-44	2.80099e-42	74.1726	15.7118	down
AT1G20190	expansin 11	2.37041	3.16435	2.32396	12.7184	10.6975	18.9722	2.48006	7.9524e-19	3.41907e-17	2.61958	14.1294	up
AT1G20460		27.4131	25.0347	30.3598	12.2151	13.5789	11.0167	-1.13236	9.97162e-09	1.22835e-07	27.6025	12.2702	down
AT1G20610	Cyclin B2;3	0.700251	0.587625	0.355787	1.17705	1.61472	1.69259	1.50538	0.000180893	0.000880071	0.547888	1.49478	up
AT1G20680	Protein of unknown function (DUF833)	0.262935	0.492209	0.493771	1.39505	2.00249	0.642933	1.70632	0.00640942	0.0198161	0.416305	1.34682	up
AT1G20720	RAD3-like DNA-binding helicase protein	0.401458	0.446215	0.250094	0.948516	1.1885	1.29864	1.69855	1.07443e-06	8.88485e-06	0.365922	1.14522	up
AT1G20823	RING/U-box superfamily protein	108.006	64.5222	86.9984	250.927	258.952	162.299	1.42024	2.27124e-11	4.2769e-10	86.509	224.059	up
AT1G20990	Cysteine/Histidine-rich C1 domain family protein	0.368839	0.172615	0.159843	0	0	0	-4.77066	0.0114917	0.0325192	0.233766	0	down
AT1G21050	Protein of unknown function, DUF617	3.1335	5.91168	3.09783	1.12026	1.14593	1.83571	-1.51344	0.000322074	0.00146091	4.04767	1.3673	down
AT1G21090	Cupredoxin superfamily protein	7.21385	7.85641	4.61632	26.6266	26.8627	19.9199	1.94576	8.42718e-19	3.61613e-17	6.56219	24.4697	up
AT1G21100	O-methyltransferase family protein	5.34071	5.08865	6.1812	0.890803	0.962356	0.573458	-2.75258	1.67355e-19	7.5802e-18	5.53685	0.808872	down
AT1G21120	O-methyltransferase family protein	14.4385	5.91822	9.35044	1.6536	2.86969	2.04553	-2.12885	1.05637e-10	1.80964e-09	9.90239	2.18961	down
AT1G21150	Mitochondrial transcription termination factor family protein	1.4161	0.958841	0.600634	2.06817	1.74618	1.91552	1.00907	0.00941767	0.0274548	0.991859	1.90996	up
AT1G21200	sequence-specific DNA binding transcription factors	10.7847	9.13984	13.9218	3.24653	4.14869	3.98994	-1.53295	5.10177e-12	1.05377e-10	11.2821	3.79506	down
AT1G21240	wall associated kinase 3	9.53278	3.32617	5.67122	1.1597	1.61359	0.505734	-2.4565	3.16477e-09	4.21197e-08	6.17673	1.09301	down
AT1G21310	extensin 3	48.3328	23.1676	39.3772	8.49909	6.19958	2.58148	-2.63262	1.49107e-06	1.19573e-05	36.9592	5.76005	down
AT1G21360	glycolipid transfer protein 2	0.629299	0.431946	0.545434	0.0417357	0	0.034195	-4.28448	0.00109646	0.00430161	0.53556	0.0253102	down
AT1G21430	Flavin-binding monooxygenase family protein	0.978553	0.739778	0.228347	0.224649	0.125841	0.0306766	-2.31526	0.0132459	0.0366034	0.648892	0.127055	down
AT1G21525		8.80497	8.46211	7.08645	3.44115	3.41715	3.1398	-1.23907	1.25542e-05	8.21753e-05	8.11784	3.3327	down
AT1G21528		0.713882	0.835233	2.62967	0.177545	0	0	-4.47376	0.00728071	0.022088	1.39293	0.0591816	down
AT1G21790	TRAM, LAG1 and CLN8 (TLC) lipid-sensing domain containing protein	25.2559	37.9304	33.8472	10.3287	9.28935	9.45816	-1.70069	1.51714e-17	5.84883e-16	32.3445	9.69208	down
AT1G21810	Plant protein of unknown function (DUF869)	0.492738	0.761979	0.612756	1.27874	0.859568	1.57155	1.03901	0.0112076	0.0318783	0.622491	1.23662	up
AT1G21830		25.54	32.7274	28.1975	6.69757	6.19647	8.07189	-1.99734	8.29935e-25	6.08978e-23	28.8216	6.98864	down
AT1G21910	Integrase-type DNA-binding superfamily protein	14.8296	14.0227	13.6113	130.959	131.334	79.0008	3.04867	2.34798e-54	8.20416e-52	14.1546	113.764	up
AT1G21980	phosphatidylinositol-4-phosphate 5-kinase 1	26.1176	28.4398	30.8865	9.04708	10.5743	12.6049	-1.36477	2.82345e-16	9.59146e-15	28.4813	10.7421	down
AT1G22360	UDP-glucosyl transferase 85A2	89.6794	96.1987	98.4705	40.396	39.9226	35.6982	-1.2526	1.28363e-24	9.3256e-23	94.7828	38.6723	down
AT1G22370	UDP-glucosyl transferase 85A5	6.73131	6.47306	6.47362	14.5547	15.0044	13.829	1.18375	3.46308e-15	1.04715e-13	6.55933	14.4627	up
AT1G22400	UDP-Glycosyltransferase superfamily protein	66.4807	90.9631	71.4821	31.2833	34.2194	43.3869	-1.02997	2.06939e-08	2.40261e-07	76.3087	36.2965	down
AT1G22410	Class-II DAHP synthetase family protein	298.385	262.727	309.976	85.4695	96.68	103.039	-1.56734	4.13017e-35	5.44415e-33	290.363	95.0627	down
AT1G22470		3.21446	2.31439	1.85739	23.2865	24.1596	23.7817	3.32706	9.27937e-40	1.6084e-37	2.46208	23.7426	up
AT1G22490	basic helix-loop-helix (bHLH) DNA-binding superfamily protein	3.89786	3.54606	6.7568	0.86975	1.38042	0.861066	-2.16962	1.34216e-08	1.61802e-07	4.73357	1.03708	down
AT1G22500	RING/U-box superfamily protein	9.59758	11.2509	13.1912	5.77812	4.05023	1.59493	-1.54264	2.86403e-05	0.000170394	11.3466	3.80776	down
AT1G22630		39.2969	44.1378	40.7524	79.6949	76.5301	86.4244	1.0101	2.64082e-13	6.50979e-12	41.3957	80.8831	up
AT1G22640	myb domain protein 3	6.12335	5.57753	7.58696	1.14473	2.01533	2.31126	-1.7732	2.88462e-08	3.26165e-07	6.42928	1.82377	down
AT1G22650	Plant neutral invertase family protein	13.0722	11.7035	12.7874	4.71173	5.41069	6.65924	-1.11399	7.85703e-10	1.16469e-08	12.521	5.59389	down
AT1G23030	ARM repeat superfamily protein	13.5043	11.7248	14.2468	25.5514	28.263	35.6109	1.22468	6.11717e-13	1.4324e-11	13.1586	29.8084	up
AT1G23140	Calcium-dependent lipid-binding (CaLB domain) family protein	7.79043	4.83967	4.72058	3.15488	3.38085	1.5172	-1.06737	0.00649703	0.0200588	5.78356	2.68431	down
AT1G23205	Plant invertase/pectin methylesterase inhibitor superfamily protein	1.72701	2.44778	1.45409	4.9578	4.45452	18.9025	2.38686	3.39329e-06	2.51503e-05	1.87629	9.43829	up
AT1G23400	RNA-binding CRS1 / YhbY (CRM) domain-containing protein	20.1384	19.918	14.8438	38.3279	32.9767	47.6785	1.16748	3.18948e-10	5.0402e-09	18.3	39.661	up
AT1G23840		3.19661	1.72615	2.27332	0.652313	1.64432	0.567858	-1.30334	0.00771167	0.0231687	2.39869	0.954831	down
AT1G23850		16.8232	11.8167	15.1963	4.73548	6.45866	3.90398	-1.50015	1.40446e-11	2.72632e-10	14.612	5.03271	down
AT1G24070	cellulose synthase-like A10	64.2947	47.916	57.0478	4.71593	8.54906	5.10652	-3.16684	2.67747e-50	7.85855e-48	56.4195	6.12384	down
AT1G24140	Matrixin family protein	30.7814	18.1381	28.1647	89.3737	89.2562	44.3492	1.57658	2.65502e-09	3.58118e-08	25.6947	74.3264	up
AT1G24260	K-box region and MADS-box transcription factor family protein	0.0388252	0	0.0673021	0.30899	0.25963	0.443035	3.2851	0.0103094	0.029673	0.0353758	0.337218	up
AT1G25370	Protein of unknown function (DUF1639)	52.1208	43.0704	66.5055	12.7538	12.8002	8.02373	-2.23215	6.19375e-23	3.96346e-21	53.8989	11.1926	down
AT1G25422		10.1192	7.95919	12.3083	4.1451	4.17004	2.46049	-1.4635	2.27185e-07	2.15561e-06	10.1289	3.59188	down
AT1G25425	CLAVATA3/ESR-RELATED 43	10.0847	11.9301	9.59055	3.55314	4.05877	6.9069	-1.06727	0.000610845	0.00256417	10.5351	4.8396	down
AT1G25430	transposable element gene	0.548377	0.497722	0.770557	2.13254	2.10209	0.96843	1.54907	5.96132e-06	4.1979e-05	0.605552	1.73435	up
AT1G25530	Transmembrane amino acid transporter family protein	2.0743	1.84067	1.26084	4.15388	3.45278	3.11792	1.10351	9.15142e-05	0.000483094	1.72527	3.57486	up
AT1G25560	AP2/B3 transcription factor family protein	147.698	179.641	196.589	79.256	77.8072	80.5559	-1.10203	3.79367e-13	9.14677e-12	174.642	79.2063	down
AT1G26200	TRAM, LAG1 and CLN8 (TLC) lipid-sensing domain containing protein	2.12112	2.20594	2.24699	0.93783	1.05069	1.07574	-1.05752	0.0070602	0.0215347	2.19135	1.02142	down
AT1G26250	Proline-rich extensin-like family protein	6.20248	0.458326	1.43829	0.108251	0	0	-6.13829	0.000773624	0.00316539	2.6997	0.0360837	down
AT1G26330	DNA binding	0.0568027	0.319001	0.0787725	0.282541	0.747036	0.425945	1.69899	0.0127467	0.0354508	0.151525	0.485174	up
AT1G26380	FAD-binding Berberine family protein	5.53259	1.75697	2.07653	0.933695	0.825832	0.684472	-1.87293	2.42166e-05	0.000147016	3.12203	0.814666	down
AT1G26390	FAD-binding Berberine family protein	1.65695	1.17492	0.870385	0.0999004	0.195864	0.184164	-2.89054	1.58684e-07	1.55595e-06	1.23408	0.159976	down
AT1G26420	FAD-binding Berberine family protein	4.0237	1.97842	3.24468	1.41872	1.56107	0.664225	-1.30624	0.000783101	0.0032	3.08226	1.21467	down
AT1G26540	Agenet domain-containing protein	0.566742	0.342235	0.237684	0.872984	0.509394	1.2666	1.28461	0.0116728	0.0329428	0.38222	0.882992	up
AT1G26761	Arabinanase/levansucrase/invertase	3.30164	4.86869	3.67154	8.39721	8.60926	12.8207	1.37692	1.07395e-07	1.08694e-06	3.94729	9.94239	up
AT1G26810	galactosyltransferase1	2.79007	2.06883	1.58599	5.46108	5.53268	5.15367	1.37961	6.43122e-10	9.68334e-09	2.1483	5.38248	up
AT1G26960	homeobox protein 23	5.88908	5.54679	8.28239	2.02654	2.76576	3.01889	-1.29604	5.41772e-06	3.84586e-05	6.57275	2.60373	down
AT1G27020		7.66584	10.0322	9.53042	1.62184	2.74483	2.17698	-2.02519	7.19596e-15	2.10086e-13	9.07616	2.18122	down
AT1G27120	Galactosyltransferase family protein	1.38719	1.80045	1.07408	2.208	2.10264	5.00507	1.18331	0.00193216	0.00704403	1.42057	3.10524	up
AT1G27190	Leucine-rich repeat protein kinase family protein	11.509	11.67	10.2759	21.7415	23.4708	20.9568	1.02753	2.13387e-16	7.31664e-15	11.1516	22.0564	up
AT1G27330	Ribosome associated membrane protein RAMP4	285.194	345.808	350.557	134.028	131.374	145.51	-1.21574	9.07297e-17	3.26345e-15	327.186	136.971	down
AT1G27580	Protein of unknown function (DUF295)	0.202104	0.227	0.630612	0	0.0450499	0.0658917	-3.19605	0.017296	0.0458002	0.353239	0.0369805	down
AT1G27695	glycine-rich protein	4.92713	7.34753	5.42862	2.40925	3.25762	2.85883	-1.01788	0.00396923	0.0131529	5.90109	2.8419	down
AT1G27700	Syntaxin/t-SNARE family protein	22.6841	24.4754	27.6493	6.53892	6.7684	12.6076	-1.48138	1.49356e-08	1.7878e-07	24.9362	8.6383	down
AT1G27730	salt tolerance zinc finger	214.567	154.166	226.349	599.682	631.452	371.777	1.47082	3.34204e-12	7.10804e-11	198.361	534.304	up
AT1G27760	interferon-related developmental regulator family protein / IFRD protein family	70.1642	61.4866	75.4935	22.0366	23.3182	22.0463	-1.57742	2.81841e-35	3.7601e-33	69.0481	22.467	down
AT1G27820	Polynucleotidyl transferase, ribonuclease H-like superfamily protein	0	0.17761	0	0.660703	0.528721	1.00533	3.67536	0.00148072	0.00558136	0.0592034	0.731583	up
AT1G27910	plant U-box 45	55.053	59.4289	67.0506	21.0291	22.0176	28.3568	-1.30398	4.45043e-15	1.33108e-13	60.5108	23.8012	down
AT1G27930	Protein of unknown function (DUF579)	71.7266	89.4665	91.7803	33.4154	29.1924	33.5553	-1.35467	3.15446e-17	1.17893e-15	84.3245	32.0544	down
AT1G28040	RING/U-box superfamily protein	0.78231	0.39428	0.365106	0.149664	0.100604	0.0490492	-2.32607	0.00531609	0.0169378	0.513899	0.0997725	down
AT1G28050	B-box type zinc finger protein with CCT domain	299.484	262.375	347.365	84.1137	98.3683	72.5984	-1.79478	3.60543e-30	3.49632e-28	303.075	85.0268	down
AT1G28060	Pre-mRNA-splicing factor 3	24.085	21.5252	24.4404	10.9063	11.0253	10.2796	-1.07784	4.90747e-18	1.99682e-16	23.3502	10.7371	down
AT1G28130	Auxin-responsive GH3 family protein	0.615017	0.11513	0.319833	1.10129	0.685452	0.885601	1.41901	0.0127432	0.0354489	0.349993	0.89078	up
AT1G28190		34.1744	27.4856	41.9402	9.52596	10.198	6.55607	-1.944	4.5879e-18	1.8772e-16	34.5334	8.76	down
AT1G28310	Dof-type zinc finger DNA-binding family protein	8.77093	13.0744	7.71937	1.72354	0.754276	2.64776	-2.46569	7.46097e-11	1.30972e-09	9.85489	1.70853	down
AT1G28390	Protein kinase superfamily protein	16.1762	15.0915	12.1024	5.37284	5.99003	5.62609	-1.30492	5.01104e-15	1.49267e-13	14.4567	5.66299	down
AT1G28560	snRNA activating complex family protein	1.76854	1.58912	1.47154	2.48657	3.46911	3.53646	1.02196	9.81009e-05	0.000513798	1.60973	3.16405	up
AT1G28670	GDSL-like Lipase/Acylhydrolase superfamily protein	5.77177	5.90145	4.13257	11.6709	11.8867	12.8093	1.2522	6.72907e-11	1.18407e-09	5.2686	12.1223	up
AT1G28680	HXXXD-type acyl-transferase family protein	22.7856	21.1518	22.9478	8.75301	10.7601	11.5529	-1.06176	7.94146e-12	1.60087e-10	22.2951	10.3554	down
AT1G28685	other RNA	25.3907	19.4175	21.7819	9.32863	11.4159	11.2413	-1.01096	1.3384e-10	2.24903e-09	22.1967	10.662	down
AT1G28710	Nucleotide-diphospho-sugar transferase family protein	6.85294	6.77599	6.1183	13.0966	17.1419	13.9641	1.20402	1.20573e-13	3.07908e-12	6.58241	14.7342	up
AT1G28720	pre-tRNA	22.7451	14.3846	15.4514	33.6349	32.8864	37.0778	1.03499	0.00491337	0.015838	17.527	34.533	up
AT1G28730	pre-tRNA	0.614732	1.15077	0	7.95006	21.2392	13.0273	4.64233	1.96056e-05	0.000122537	0.588499	14.0722	up
AT1G29060	Target SNARE coiled-coil domain protein	12.6777	15.5093	13.2051	5.25497	5.01973	6.57158	-1.24815	3.04274e-08	3.42258e-07	13.7974	5.61543	down
AT1G29070	Ribosomal protein L34	140.465	212.987	140.181	280.157	306.969	444.498	1.10605	7.47915e-07	6.37393e-06	164.544	343.874	up
AT1G29160	Dof-type zinc finger DNA-binding family protein	12.4902	11.2984	12.0608	1.33428	3.45681	4.98774	-1.82092	4.65965e-06	3.35205e-05	11.9498	3.25961	down
AT1G29170	SCAR family protein	2.09707	1.97584	1.54075	4.0066	3.14212	3.97319	1.03986	1.43344e-06	1.15414e-05	1.87122	3.7073	up
AT1G29280	WRKY DNA-binding protein 65	3.09206	3.10087	5.01542	1.9335	1.42771	0.792081	-1.4065	0.000831069	0.0033685	3.73612	1.38443	down
AT1G29300	Plant protein of unknown function (DUF641)	18.2895	16.1145	19.5721	5.19155	6.8219	4.92935	-1.63544	1.90252e-20	9.41128e-19	17.9921	5.6476	down
AT1G29400	MEI2-like protein 5	54.0656	56.3765	52.547	13.6789	14.5595	19.2229	-1.73374	5.62358e-28	4.93195e-26	54.3297	15.8204	down
AT1G29430	SAUR-like auxin-responsive protein family	6.64556	10.2059	5.36847	2.95252	3.02018	4.25967	-1.06734	0.00196597	0.00715677	7.40665	3.41079	down
AT1G29530		6.08732	6.8372	5.41224	18.8705	16.6767	20.7107	1.66546	5.52677e-19	2.42352e-17	6.11225	18.7526	up
AT1G29600	Zinc finger C-x8-C-x5-C-x3-H type family protein	0.983571	0.672755	1.40989	1.99457	2.4454	1.9117	1.08212	0.00789485	0.0236329	1.02207	2.11723	up
AT1G29640	Protein of unknown function, DUF584	7.20655	7.06393	9.93483	2.59671	2.46648	1.52628	-1.85061	1.02521e-08	1.26078e-07	8.06844	2.19649	down
AT1G29660	GDSL-like Lipase/Acylhydrolase superfamily protein	66.4074	87.3255	54.4953	129.88	120.973	187.364	1.12075	2.50781e-07	2.35212e-06	69.4094	146.072	up
AT1G29680	Protein of unknown function (DUF1264)	14.719	17.124	13.4313	7.37289	7.10486	6.252	-1.08546	5.41912e-08	5.80491e-07	15.0914	6.90992	down
AT1G29715		1.37776	0.268661	1.06147	0.247473	0.255926	0.109179	-2.10608	0.0013019	0.00499318	0.902632	0.204192	down
AT1G30190		0.793202	0.197981	0.366664	3.26156	4.59703	2.28436	2.95952	4.39683e-08	4.80097e-07	0.452616	3.38099	up
AT1G30260		65.4771	76.5005	74.8572	23.2495	20.6632	28.4668	-1.53714	4.53085e-18	1.85731e-16	72.2783	24.1265	down
AT1G30300	Metallo-hydrolase/oxidoreductase superfamily protein	14.0741	17.2312	19.798	7.78913	8.47403	7.3048	-1.08196	2.93338e-08	3.30591e-07	17.0345	7.85599	down
AT1G30320	Remorin family protein	116.854	121.344	142.675	6.83066	6.65695	7.28172	-4.15409	4.01212e-171	2.94396e-167	126.958	6.92311	down
AT1G30473	Heavy metal transport/detoxification superfamily protein	1.82012	1.56841	1.10179	0.431114	0.70839	0.918376	-1.06483	0.0145553	0.0395612	1.49677	0.68596	down
AT1G30475		7.324	5.74354	6.89696	2.99317	2.73563	3.29134	-1.09478	4.08993e-06	2.97625e-05	6.65483	3.00672	down
AT1G30520	acyl-activating enzyme 14	5.87179	7.33522	4.80541	13.8935	13.3493	17.1226	1.34821	3.80111e-11	6.92663e-10	6.00414	14.7885	up
AT1G30600	Subtilase family protein	1.85328	1.42854	1.71429	4.12114	4.00955	4.46821	1.38249	5.65199e-12	1.15845e-10	1.66537	4.19963	up
AT1G30640	Protein kinase family protein	69.7071	69.1681	77.0039	35.4631	39.1404	28.3237	-1.02989	3.87098e-12	8.13091e-11	71.9597	34.3091	down
AT1G30690	Sec14p-like phosphatidylinositol transfer family protein	18.3968	16.3016	17.0117	33.345	32.9174	38.4048	1.06436	1.99067e-16	6.87922e-15	17.2367	34.8891	up
AT1G30720	FAD-binding Berberine family protein	16.0925	14.6103	13.6835	6.12035	6.74352	6.87946	-1.12137	2.85217e-14	7.76734e-13	14.7954	6.58111	down
AT1G30760	FAD-binding Berberine family protein	0.728281	0.593707	0.692312	0.0233711	0.157101	0.0957423	-2.84404	5.13892e-05	0.000289317	0.671433	0.0920714	down
AT1G30840	purine permease 4	0.473228	1.0422	0.627307	1.8554	2.38892	1.92858	1.55788	8.45818e-05	0.000450278	0.714246	2.05763	up
AT1G30860	RING/U-box superfamily protein	0.775912	1.10516	0.804086	0.419504	0.187994	0.261219	-1.57907	0.000571768	0.00242138	0.895051	0.289572	down
AT1G31175		7.03996	8.29383	8.14211	2.84998	3.53946	4.01847	-1.13063	4.30283e-08	4.70244e-07	7.8253	3.4693	down
AT1G31290	ARGONAUTE 3	1.0988	0.416009	0.631345	4.02851	4.22433	1.95221	2.30319	5.70764e-10	8.64115e-09	0.715385	3.40168	up
AT1G31710	Copper amine oxidase family protein	17.159	6.11657	9.31257	3.39008	3.79803	3.74155	-1.51595	6.59056e-07	5.66933e-06	10.8627	3.64322	down
AT1G31900		2.05864	1.44515	1.93298	0	0.382401	0.419485	-2.69976	0.013875	0.0380473	1.81225	0.267295	down
AT1G32060	phosphoribulokinase	465.847	495.454	422.823	911.665	823.26	950.766	1.0022	2.02364e-16	6.97125e-15	461.374	895.23	up
AT1G32080	membrane protein, putative	91.6218	128.236	93.2077	233.683	204.284	263.394	1.20702	1.16469e-11	2.28915e-10	104.355	233.787	up
AT1G32090	early-responsive to dehydration stress protein (ERD4)	6.84176	6.82872	4.80582	11.9352	13.0281	12.4349	1.06537	1.59759e-10	2.65017e-09	6.15877	12.4661	up
AT1G32190	alpha/beta-Hydrolases superfamily protein	1.0084	1.40303	1.34646	2.60282	2.24778	2.55462	1.01821	0.000863756	0.0034875	1.25263	2.46841	up
AT1G32350	alternative oxidase 1D	34.7006	16.7816	15.8552	4.80459	9.43826	7.172	-1.59839	1.86173e-07	1.79668e-06	22.4458	7.13829	down
AT1G32690		9.4805	7.89342	8.31261	3.72866	4.30022	1.70719	-1.36942	3.99359e-05	0.000230737	8.56218	3.24536	down
AT1G32700	PLATZ transcription factor family protein	54.2918	62.9187	68.0866	5.89673	8.71164	8.41501	-2.97092	2.67153e-57	1.03173e-54	61.7657	7.67446	down
AT1G32740	SBP (S-ribonuclease binding protein) family protein	2.37764	2.77325	2.31441	0.727787	1.34535	0.894439	-1.30109	0.000469512	0.00203853	2.48844	0.989194	down
AT1G32860	Glycosyl hydrolase superfamily protein	36.3186	35.4135	34.275	14.0461	16.3203	15.734	-1.15767	2.73032e-21	1.45175e-19	35.3357	15.3668	down
AT1G32900	UDP-Glycosyltransferase superfamily protein	13.6699	9.24183	11.2356	1.16506	1.62032	1.74454	-2.86206	1.26495e-37	1.92037e-35	11.3825	1.50997	down
AT1G32910	HXXXD-type acyl-transferase family protein	27.3813	10.7801	18.0674	7.66994	8.62827	4.78423	-1.36511	1.03576e-05	6.92384e-05	18.7429	7.02748	down
AT1G32920		361.671	269.947	413.09	876.539	820.106	474.585	1.09606	2.02122e-06	1.57428e-05	348.236	723.743	up
AT1G32960	Subtilase family protein	14.9352	7.18885	10.288	4.26927	6.85187	4.38627	-1.0166	0.000129196	0.00065293	10.804	5.16914	down
AT1G33030	O-methyltransferase family protein	1.94	1.54681	1.3078	0.357395	0.160161	0.117129	-2.8787	7.46454e-07	6.36641e-06	1.5982	0.211562	down
AT1G33170	S-adenosyl-L-methionine-dependent methyltransferases superfamily protein	4.18896	4.82705	3.69921	9.29764	8.65472	12.1111	1.29016	2.39307e-10	3.86207e-09	4.23841	10.0212	up
AT1G33230	TMPIT-like protein	29.7499	37.2003	35.5337	14.6674	16.1076	14.7248	-1.13339	1.85491e-13	4.6658e-12	34.1613	15.1666	down
AT1G33240	GT-2-like 1	8.68684	11.1305	7.95314	18.6092	16.3179	29.394	1.25984	1.40674e-07	1.39301e-06	9.25683	21.4404	up
AT1G33260	Protein kinase superfamily protein	12.0409	14.2755	13.6271	1.76235	2.46803	3.5647	-2.30821	2.19804e-19	9.87457e-18	13.3145	2.59836	down
AT1G33480	RING/U-box superfamily protein	1.30659	1.79621	0.778569	3.45262	3.27651	4.8589	1.6336	2.09322e-05	0.000129506	1.29379	3.86268	up
AT1G33560	Disease resistance protein (CC-NBS-LRR class) family	5.26726	2.95806	4.03382	8.58724	8.91965	7.74058	1.09232	1.30905e-07	1.30389e-06	4.08638	8.41582	up
AT1G33720	cytochrome P450, family 76, subfamily C, polypeptide 6	4.30274	1.61606	4.10939	12.3505	12.5844	9.27023	1.8166	7.90672e-09	9.86123e-08	3.34273	11.4017	up
AT1G33760	Integrase-type DNA-binding superfamily protein	40.4546	21.2596	31.0197	326.6	356.049	193.588	3.28799	3.68718e-40	6.65295e-38	30.9113	292.079	up
AT1G33790	jacalin lectin family protein	3.35097	2.58106	2.90439	0.902846	1.01149	0.49789	-1.84287	1.22187e-09	1.75568e-08	2.94547	0.804076	down
AT1G33930	P-loop containing nucleoside triphosphate hydrolases superfamily protein	0.0875582	0.532699	0.0758896	0.609729	0.975859	1.28459	2.08326	0.012891	0.0357877	0.232049	0.956727	up
AT1G34065	S-adenosylmethionine carrier 2	2.01185	1.56923	1.91811	3.10219	3.25127	5.13805	1.1162	0.000419524	0.00184626	1.83306	3.83051	up
AT1G34190	NAC domain containing protein 17	50.2704	50.4352	52.9856	21.0663	22.2436	23.5154	-1.1583	1.12615e-22	6.94398e-21	51.2304	22.2751	down
AT1G34355	forkhead-associated (FHA) domain-containing protein	0.221544	0.0901579	0.108533	0.383296	0.440156	0.690895	1.92029	0.000115016	0.000591551	0.140078	0.504782	up
AT1G34420	leucine-rich repeat transmembrane protein kinase family protein	19.529	14.0662	16.781	8.80319	9.3354	4.25298	-1.12825	1.29708e-05	8.4567e-05	16.7921	7.46385	down
AT1G34640	peptidases	2.42223	4.19085	3.18095	7.81315	7.03541	5.68357	1.10173	0.000940719	0.00376168	3.26467	6.84404	up
AT1G35140	Phosphate-responsive 1 family protein	315.377	225.766	295.206	1126.29	1104.86	686.522	1.84682	1.20057e-20	6.04764e-19	278.783	972.56	up
AT1G35180	TRAM, LAG1 and CLN8 (TLC) lipid-sensing domain containing protein	0.891155	1.29751	0.686572	2.95511	2.53822	3.06684	1.62428	7.91362e-05	0.000424263	0.958412	2.85339	up
AT1G35210		11.6103	5.18534	7.96872	24.566	23.8438	16.7649	1.44833	2.32985e-07	2.20116e-06	8.2548	21.7249	up
AT1G35230	arabinogalactan protein 5	29.5791	17.5815	22.144	8.94941	12.7535	7.74308	-1.19295	2.7791e-06	2.1059e-05	23.1015	9.81534	down
AT1G35260	MLP-like protein 165	2.94302	1.78241	2.55081	0.74629	0.836096	0.658487	-1.65807	0.000441486	0.00192826	2.42541	0.746958	down
AT1G35310	MLP-like protein 168	0.391688	0.418989	0.824472	0	0.0623637	0.0456077	-3.9015	0.0053185	0.016943	0.54505	0.0359905	down
AT1G35350	EXS (ERD1/XPR1/SYG1) family protein	147.595	116.148	158.839	71.8433	74.9347	46.3579	-1.08905	2.44122e-08	2.79306e-07	140.861	64.3787	down
AT1G35530	DEAD/DEAH box RNA helicase family protein	0.10298	0.0385552	0.116033	0.22538	0.493526	0.30217	2.01794	0.000977743	0.00389122	0.0858559	0.340359	up
AT1G36370	serine hydroxymethyltransferase 7	127.147	110.957	138.108	57.5956	55.2502	40.8613	-1.25008	1.37919e-14	3.88735e-13	125.404	51.2357	down
AT1G36600	transposable element gene	0.251741	0.257048	0.218193	0	0	0.0373068	-4.06167	0.00375758	0.0125536	0.242327	0.0124356	down
AT1G36610	transposable element gene	0.173401	0.0541006	0.125244	0	0	0.0235558	-3.6879	0.0163538	0.043673	0.117582	0.00785193	down
AT1G37150	holocarboxylase synthetase 2	0.274424	0.440328	0.475705	0	0.0436932	0	-4.83669	0.00150534	0.00566059	0.396819	0.0145644	down
AT1G42550	plastid movement impaired1	11.2543	12.08	8.99177	21.1171	19.7353	22.4986	1.01858	1.93903e-11	3.69877e-10	10.7754	21.117	up
AT1G43160	related to AP2 6	65.1264	37.7856	73.9421	5.8063	5.74609	2.85434	-3.5832	8.36625e-34	1.0009e-31	58.9514	4.80225	down
AT1G43675	transposable element gene	6.10492	6.81302	5.29134	28.3808	20.0197	17.7029	1.90592	2.1163e-11	4.00568e-10	6.06976	22.0345	up
AT1G43770	RING/FYVE/PHD zinc finger superfamily protein	3.18198	3.02309	2.94456	1.33283	1.46656	1.57953	-1.01514	4.58711e-05	0.000261528	3.04988	1.45964	down
AT1G44000		19.7735	30.5098	17.6577	38.1894	43.0076	61.8301	1.1181	6.56854e-06	4.57719e-05	22.647	47.6757	up
AT1G44110	Cyclin A1;1	0.437683	0.640105	0.592741	0.843612	0.975618	2.72017	1.49262	0.00606497	0.0189212	0.556843	1.51313	up
AT1G44130	Eukaryotic aspartyl protease family protein	1.9623	1.97274	1.88976	0.506105	1.29602	0.681233	-1.20649	0.00571321	0.0180127	1.9416	0.827785	down
AT1G44160	HSP40/DnaJ peptide-binding protein	0.274532	0.456817	0.475892	0.0606907	0.067994	0.0745879	-2.53166	0.00591852	0.0185458	0.402414	0.0677576	down
AT1G44350	IAA-leucine resistant (ILR)-like gene 6	301.275	287.387	311.895	89.8069	93.6018	62.8064	-1.83048	1.79496e-30	1.77185e-28	300.186	82.0717	down
AT1G44800	nodulin MtN21 /EamA-like transporter family protein	16.8945	10.664	21.6377	9.3896	10.2083	4.34729	-1.00439	0.00185281	0.00678295	16.3987	7.98173	down
AT1G44830	Integrase-type DNA-binding superfamily protein	1.47536	2.81938	2.71732	6.11543	6.78283	9.11914	1.6852	1.70005e-06	1.34616e-05	2.33735	7.33913	up
AT1G44900	minichromosome maintenance (MCM2/3/5) family protein	2.16405	2.88775	1.66021	3.66562	3.65043	6.31653	1.07322	0.000255741	0.00119925	2.23734	4.54419	up
AT1G45145	thioredoxin H-type 5	640.575	443.6	674.217	153.027	165.873	103.628	-2.01583	6.00544e-23	3.85416e-21	586.131	140.843	down
AT1G45230	Protein of unknown function (DUF3223)	18.9979	19.0765	14.6679	32.0521	33.7328	36.3741	1.00202	6.71512e-11	1.18256e-09	17.5808	34.053	up
AT1G45233	THO complex, subunit 5	7.16899	5.994	6.38552	2.98803	2.08435	3.48747	-1.13347	4.36656e-06	3.15876e-05	6.51617	2.85328	down
AT1G45616	receptor like protein 6	1.09725	2.08179	2.75026	0.0885048	0.0165259	0.0483427	-5.21961	9.86394e-18	3.8705e-16	1.97643	0.0511244	down
AT1G46264	heat shock transcription factor B4	1.98182	2.02672	2.03581	0.25557	0.490843	1.40594	-1.42115	0.01221	0.0342131	2.01478	0.717449	down
AT1G47056	VIER F-box proteine 1	14.384	16.2038	15.8919	7.01331	6.81174	8.43388	-1.01667	4.4692e-09	5.7735e-08	15.4932	7.41964	down
AT1G47520	transposable element gene	0.569653	0.867983	0.482255	1.10704	1.4322	2.26755	1.37305	0.000228933	0.00108657	0.639963	1.60226	up
AT1G47580	Pentatricopeptide repeat (PPR) superfamily protein	2.06622	3.10452	1.83799	6.92381	5.81775	13.4287	1.95333	4.69397e-07	4.16814e-06	2.33625	8.72341	up
AT1G47750	peroxin 11A	18.0666	19.6139	21.8121	10.3259	9.49487	8.89921	-1.01145	2.82111e-08	3.20109e-07	19.8309	9.57332	down
AT1G47860	transposable element gene	1.94223	2.17631	1.49146	0.376334	0.313645	0.526433	-2.14662	1.57721e-17	6.05917e-16	1.87	0.405471	down
AT1G48040	Protein phosphatase 2C family protein	12.2202	12.2057	13.672	4.02508	4.08288	6.23916	-1.35935	7.9102e-10	1.17178e-08	12.6993	4.78237	down
AT1G48330		11.4273	17.3996	10.1137	1.52107	2.24226	6.03448	-1.92982	2.86617e-05	0.000170475	12.9802	3.26594	down
AT1G48480	receptor-like kinase 1	4.47623	6.14009	2.7091	9.52024	8.5155	18.1322	1.4941	7.30414e-06	5.04506e-05	4.44181	12.056	up
AT1G48560		1.80615	2.52652	1.54825	0.493622	0.929079	0.857405	-1.32608	0.00023242	0.00110193	1.96031	0.760035	down
AT1G48745		8.35902	12.2144	13.2913	3.23054	4.69168	5.44077	-1.30418	1.54055e-05	9.83816e-05	11.2882	4.45433	down
AT1G49000		4.88308	5.21507	8.51891	2.30432	1.18614	1.22463	-1.94569	2.79135e-06	2.11446e-05	6.20568	1.5717	down
AT1G49010	Duplicated homeodomain-like superfamily protein	6.13779	4.42465	3.53554	8.57109	7.05317	11.8388	1.02369	0.000241266	0.00113921	4.69932	9.15435	up
AT1G49160	Protein kinase superfamily protein	0.859431	0.804419	1.15459	2.39392	2.682	1.76876	1.31065	3.63097e-05	0.000211232	0.93948	2.28156	up
AT1G49220	RING/U-box superfamily protein	0.172893	0.485479	0.399606	1.49064	1.99117	1.22131	2.16872	0.000654041	0.0027242	0.35266	1.56771	up
AT1G49430	long-chain acyl-CoA synthetase 2	4.66002	3.86325	1.89586	8.00394	7.61038	8.12362	1.24651	6.04406e-06	4.24802e-05	3.47304	7.91265	up
AT1G49470	Family of unknown function (DUF716)	5.00406	4.97421	3.22767	1.5436	2.11845	1.96029	-1.18361	0.000105882	0.000549712	4.40198	1.87411	down
AT1G49490	Leucine-rich repeat (LRR) family protein	1.25266	0.651377	0.663497	2.07694	1.95845	2.18383	1.33824	2.39288e-05	0.00014563	0.855845	2.07307	up
AT1G49580	Calcium-dependent protein kinase (CDPK) family protein	4.08745	4.51971	3.16067	9.30852	7.99458	8.91686	1.20496	3.00502e-10	4.77269e-09	3.92261	8.73999	up
AT1G49620	Cyclin-dependent kinase inhibitor family protein	4.48778	4.9356	4.95937	0.837093	1.68809	2.10327	-1.58666	4.03272e-05	0.000232876	4.79425	1.54282	down
AT1G49660	carboxyesterase 5	13.844	16.1128	13.5989	38.8416	34.8394	46.1494	1.50613	2.09974e-18	8.78738e-17	14.5186	39.9435	up
AT1G49750	Leucine-rich repeat (LRR) family protein	121.559	89.2286	64.9207	237.467	193.412	197.872	1.24544	2.95057e-10	4.69637e-09	91.9029	209.583	up
AT1G49840	Protein of unknown function (DUF620)	7.19028	6.10605	5.63361	15.3008	15.1253	14.438	1.29322	2.66688e-18	1.11173e-16	6.30998	14.9547	up
AT1G49870		0.433776	0.435011	0.201412	0.570231	1.00144	1.23746	1.45003	0.0017585	0.00648405	0.356733	0.936377	up
AT1G50110	D-aminoacid aminotransferase-like PLP-dependent enzymes superfamily protein	1.58556	1.54722	0.58479	2.18142	2.03034	3.54708	1.12748	0.0103107	0.029673	1.23919	2.58628	up
AT1G50180	NB-ARC domain-containing disease resistance protein	3.12954	2.60733	2.33989	0.957942	1.20737	0.756833	-1.42999	1.11109e-07	1.12143e-06	2.69225	0.974048	down
AT1G50420	scarecrow-like 3	11.9556	13.6959	10.5983	1.39925	1.89632	3.2359	-2.41761	1.19983e-17	4.66641e-16	12.0833	2.17716	down
AT1G50732		11.6687	16.4204	14.2289	29.0605	26.8174	28.9917	1.04391	2.26752e-07	2.15243e-06	14.106	28.2899	up
AT1G50750	Plant mobile domain protein family	4.42442	2.15528	3.20754	19.2094	18.3314	10.2824	2.33888	4.71191e-17	1.7345e-15	3.26242	15.9411	up
AT1G51080		9.56277	12.3174	9.69511	25.4848	23.2715	24.5272	1.25765	7.3049e-13	1.69623e-11	10.5251	24.4278	up
AT1G51100		11.6397	14.3079	8.74624	21.121	19.1528	33.4291	1.13869	1.733e-05	0.000109339	11.5646	24.5676	up
AT1G51140	basic helix-loop-helix (bHLH) DNA-binding superfamily protein	6.5642	6.37347	5.35891	15.2009	13.2355	13.7421	1.25332	1.97255e-14	5.48947e-13	6.09886	14.0595	up
AT1G51355		1.18029	0.883788	0.767244	0.293541	0.263092	0.192404	-1.87682	0.0124539	0.0347726	0.943773	0.249679	down
AT1G51440	alpha/beta-Hydrolases superfamily protein	6.20941	8.9969	8.13744	3.06389	2.38067	3.15814	-1.39638	6.67667e-09	8.41291e-08	7.78125	2.86757	down
AT1G51450	TRAUCO	7.76587	8.91874	9.99317	2.91487	3.15944	4.77644	-1.25168	3.09625e-07	2.8399e-06	8.8926	3.61691	down
AT1G51680	4-coumarate:CoA ligase 1	247.999	225.125	257.061	26.795	31.4247	39.8853	-2.85085	2.45676e-68	1.54516e-65	243.395	32.7016	down
AT1G51750	transposable element gene	0.407307	0.148258	0.568765	0.135065	0	0	-3.02052	0.0120082	0.0337337	0.374777	0.0450216	down
AT1G51760	peptidase M20/M25/M40 family protein	600.305	506.922	659.151	222.875	253.562	162.555	-1.42739	4.47855e-16	1.48697e-14	588.793	212.997	down
AT1G51780	IAA-leucine resistant (ILR)-like gene 5	26.3656	19.9426	54.6492	0.431396	0.257764	0.235635	-6.73891	2.79494e-30	2.73445e-28	33.6525	0.308265	down
AT1G51790	Leucine-rich repeat protein kinase family protein	30.4292	27.0399	28.4477	7.14018	7.33279	6.58138	-1.98543	3.02195e-63	1.51187e-60	28.6389	7.01812	down
AT1G51800	Leucine-rich repeat protein kinase family protein	74.0755	57.3967	71.0174	6.70338	8.48738	7.56123	-3.11055	1.53901e-102	2.60602e-99	67.4965	7.584	down
AT1G51805	Leucine-rich repeat protein kinase family protein	380.785	399.516	468.035	147.29	145.143	115.445	-1.57487	1.00603e-25	7.77044e-24	416.112	135.959	down
AT1G51820	Leucine-rich repeat protein kinase family protein	65.4086	55.0965	55.9413	8.16679	9.762	8.64568	-2.68665	1.40737e-108	2.81641e-105	58.8155	8.85816	down
AT1G51850	Leucine-rich repeat protein kinase family protein	9.48793	6.30187	9.07129	0.275701	0.417894	0.531502	-4.28149	8.73734e-52	2.78746e-49	8.28703	0.408366	down
AT1G51860	Leucine-rich repeat protein kinase family protein	2.05325	1.65834	1.79397	0.444759	0.313732	0.418386	-2.16848	1.77761e-11	3.4205e-10	1.83519	0.392292	down
AT1G51890	Leucine-rich repeat protein kinase family protein	3.52491	1.23909	2.15658	0.53948	1.35101	0.455009	-1.52376	0.000936507	0.00374688	2.30686	0.781833	down
AT1G51950	indole-3-acetic acid inducible 18	91.5124	75.7217	104.692	39.2532	46.4128	36.8961	-1.11012	2.97435e-12	6.38151e-11	90.6421	40.8541	down
AT1G52000	Mannose-binding lectin superfamily protein	128.719	140.492	129.752	52.9415	63.1363	41.9338	-1.29751	7.7789e-17	2.82569e-15	132.988	52.6706	down
AT1G52030	myrosinase-binding protein 2	41.0287	25.2599	27.7484	1.51831	2.3214	1.75622	-4.0254	1.60902e-78	1.60997e-75	31.3457	1.86531	down
AT1G52040	myrosinase-binding protein 1	544.267	481.58	566.898	68.2862	71.1627	34.9168	-3.15219	1.1184e-43	2.43756e-41	530.915	58.1219	down
AT1G52140		25.3344	25.4331	25.1012	8.94459	14.0072	13.4019	-1.0199	1.78938e-07	1.73476e-06	25.2896	12.1179	down
AT1G52190	Major facilitator superfamily protein	27.5757	25.3209	25.0765	77.3243	76.7159	66.0703	1.54156	1.41863e-41	2.73932e-39	25.991	73.3702	up
AT1G52200	PLAC8 family protein	56.0405	43.8265	58.355	19.9072	22.7971	12.2931	-1.48725	3.26614e-11	6.00649e-10	52.7407	18.3324	down
AT1G52270		3.1335	3.05513	1.41454	1.03908	0.873092	1.11739	-1.26455	0.0121089	0.033973	2.53439	1.00985	down
AT1G52342		1.37509	3.70033	2.97959	11.6276	11.1111	10.2273	2.06014	1.7853e-08	2.10385e-07	2.685	10.9887	up
AT1G52400	beta glucosidase 18	1983.69	1669.38	1802.38	357.3	430.574	225.335	-2.38778	1.02344e-32	1.17339e-30	1818.48	337.736	down
AT1G52410	TSK-associating protein 1	296.445	226.863	287.932	46.2865	59.3219	34.7318	-2.49088	3.91023e-40	6.94161e-38	270.414	46.7801	down
AT1G52560	HSP20-like chaperones superfamily protein	2.31534	0.907173	1.49342	0.482092	0.660129	0.526653	-1.44818	0.012558	0.0350101	1.57198	0.556292	down
AT1G52570	phospholipase D alpha 2	1.20059	0.637347	0.403813	2.01438	1.41798	1.40213	1.17689	0.00395592	0.0131206	0.747251	1.6115	up
AT1G52630	O-fucosyltransferase family protein	7.95698	9.69746	8.81229	2.50114	4.03382	5.292	-1.11785	4.07109e-05	0.000234783	8.82225	3.94232	down
AT1G52700	alpha/beta-Hydrolases superfamily protein	1.81557	2.20457	2.04145	6.1995	4.86734	6.7192	1.59932	6.73754e-08	7.09973e-07	2.02053	5.92868	up
AT1G52720		598.818	673.59	745.037	262.235	269.223	227.601	-1.37189	2.61657e-22	1.54835e-20	672.482	253.02	down
AT1G52750	alpha/beta-Hydrolases superfamily protein	0.603113	0.345988	0.219213	0.44515	0.737235	1.91875	1.48429	0.0145803	0.0396241	0.389438	1.03371	up
AT1G52760	lysophospholipase 2	80.8965	78.777	87.6131	23.8035	23.0664	25.836	-1.72162	4.10393e-40	7.22718e-38	82.4289	24.2353	down
AT1G52790	2-oxoglutarate (2OG) and Fe(II)-dependent oxygenase superfamily protein	0.996221	0.444025	1.39798	0.283158	0.105744	0.115999	-2.45113	0.00320468	0.0109558	0.946076	0.168301	down
AT1G52855		7.12333	6.89211	10.475	2.70716	2.58691	2.93564	-1.5323	4.64087e-06	3.34073e-05	8.16349	2.74323	down
AT1G52890	NAC domain containing protein 19	226.075	161.859	222.95	54.4885	62.5099	33.4828	-1.98071	9.66867e-20	4.48077e-18	203.628	50.1604	down
AT1G53080	Legume lectin family protein	0.883136	0.729359	0.990574	2.7907	4.1687	3.00631	1.97031	9.6003e-07	8.02016e-06	0.867689	3.32191	up
AT1G53110		14.0731	14.4936	15.1152	3.97533	5.3977	3.68192	-1.70876	3.21845e-21	1.69899e-19	14.5606	4.35165	down
AT1G53140	Dynamin related protein 5A	0.636122	0.31337	0.246656	0.882621	0.708974	0.927817	1.146	0.0111733	0.0318062	0.398716	0.839804	up
AT1G53160	squamosa promoter binding protein-like 4	37.0302	29.2942	36.6612	13.1014	13.4692	12.2076	-1.36586	2.6194e-17	9.83975e-16	34.3285	12.9261	down
AT1G53180		0.447078	0.26901	0.33214	0.762444	1.38806	0.884974	1.57521	0.0033002	0.0112527	0.349409	1.01183	up
AT1G53345		1.21111	1.23664	0.763427	2.33664	3.39499	2.8717	1.46955	3.41714e-05	0.000200004	1.07039	2.86778	up
AT1G53500	NAD-dependent epimerase/dehydratase family protein	51.9178	63.9618	61.8412	21.2834	24.9773	26.407	-1.25072	2.10417e-16	7.22607e-15	59.2403	24.2226	down
AT1G53520	Chalcone-flavanone isomerase family protein	13.5418	23.6486	11.2645	30.6048	36.0096	53.8543	1.35804	3.4111e-06	2.52398e-05	16.1516	40.1562	up
AT1G53580	glyoxalase II 3	71.6551	64.7222	74.4277	32.8452	36.3587	30.822	-1.03444	2.26965e-16	7.77012e-15	70.2683	33.342	down
AT1G53625		17.3082	13.0569	16.7928	3.59787	5.27847	2.24596	-2.06029	1.1729e-10	1.99529e-09	15.7193	3.70743	down
AT1G53633		5.29951	6.61371	7.48531	1.75734	0.437514	1.51982	-2.31945	2.92362e-06	2.20478e-05	6.46618	1.23822	down
AT1G53700	WAG 1	1.27286	1.54338	1.75513	0.0863355	0.128966	0.21221	-3.34801	3.07714e-09	4.11276e-08	1.52379	0.142504	down
AT1G54000	GDSL-like Lipase/Acylhydrolase superfamily protein	2.72331	1.44185	2.1458	0.656772	0.705148	0.627793	-1.61688	2.08194e-05	0.000128916	2.10366	0.663238	down
AT1G54010	GDSL-like Lipase/Acylhydrolase superfamily protein	23.955	20.378	26.4129	0.868831	0.695274	1.29659	-4.55659	5.70285e-75	4.82834e-72	23.582	0.953565	down
AT1G54020	GDSL-like Lipase/Acylhydrolase superfamily protein	23.4984	18.2884	41.4591	0.60843	1.72205	1.4955	-4.41325	3.59227e-34	4.39315e-32	27.7486	1.27533	down
AT1G54030	GDSL-like Lipase/Acylhydrolase superfamily protein	110.683	93.3131	122.283	44.0925	43.9633	33.7361	-1.38084	7.73526e-18	3.06804e-16	108.76	40.5973	down
AT1G54095	Protein of unknown function (DUF1677)	1.75976	1.29773	1.80256	0	0	0	-7.37208	2.32634e-08	2.67413e-07	1.62002	0	down
AT1G54160	nuclear factor Y, subunit A5	4.17782	3.79705	4.59192	2.19854	2.05821	1.35716	-1.12918	5.84383e-05	0.000324767	4.18893	1.87131	down
AT1G54260	winged-helix DNA-binding transcription factor family protein	26.1341	23.007	27.7962	11.5329	11.5443	13.7354	-1.01696	7.71661e-10	1.14542e-08	25.6458	12.2709	down
AT1G54385	ARM repeat superfamily protein	0.251958	0.904017	0.418563	0.87728	1.21686	2.1221	1.45867	0.00651581	0.0201074	0.524846	1.40541	up
AT1G54540	Late embryogenesis abundant (LEA) hydroxyproline-rich glycoprotein family	1.69247	0.0960083	0.355617	0	0	0	-6.20569	0.000272729	0.00126631	0.714699	0	down
AT1G54820	Protein kinase superfamily protein	7.57433	7.36009	4.86105	16.3068	14.8537	15.4341	1.28661	3.34302e-11	6.1376e-10	6.59849	15.5315	up
AT1G54890	Late embryogenesis abundant (LEA) protein-related	0.860951	0.952358	0.407026	0	0	0.0318972	-5.71825	4.74039e-05	0.000269221	0.740112	0.0106324	down
AT1G55210	Disease resistance-responsive (dirigent-like protein) family protein	135.627	118.463	134.816	50.4785	53.6754	56.9481	-1.22641	9.98946e-24	6.82913e-22	129.635	53.7007	down
AT1G55370	NDH-dependent cyclic electron flow 5	6.07609	6.20892	4.17926	12.5882	13.2333	18.3332	1.47555	5.03592e-11	9.01265e-10	5.48809	14.7182	up
AT1G55380	Cysteine/Histidine-rich C1 domain family protein	0.178291	0.0208598	0.21248	0.57644	0.521613	0.58128	2.0724	0.00372725	0.0124807	0.13721	0.559778	up
AT1G55490	chaperonin 60 beta	161.098	213.907	136.971	300.203	298.076	437.511	1.06252	2.96078e-07	2.72587e-06	170.659	345.263	up
AT1G55590	RNI-like superfamily protein	23.6198	21.8904	21.3876	7.9235	9.37146	9.57427	-1.27029	4.55481e-21	2.37595e-19	22.2993	8.95641	down
AT1G55990	glycine-rich protein	4.10992	0.394548	1.09606	0	0.469806	0	-3.60777	0.00654563	0.0201833	1.86684	0.156602	down
AT1G56020		2.64808	4.98665	3.03291	0.501779	0.772972	0.745153	-2.36336	1.7813e-09	2.48805e-08	3.55588	0.673302	down
AT1G56210	Heavy metal transport/detoxification superfamily protein	1.08733	0.868063	0.803833	1.90886	1.42571	2.18957	1.06097	0.00486079	0.0156961	0.919742	1.84138	up
AT1G56520	Disease resistance protein (TIR-NBS-LRR class) family	12.4941	6.80171	8.19325	38.7702	38.7396	21.5718	1.90077	3.10483e-14	8.3861e-13	9.16303	33.0272	up
AT1G56555		0.16577	0.0775797	0.0718394	0.824553	0.277133	2.90497	3.76188	0.00162744	0.00605455	0.105063	1.33555	up
AT1G56600	galactinol synthase 2	3.61441	4.65912	5.19374	17.6629	14.3466	4.10891	1.45516	0.000392967	0.00174333	4.48909	12.0395	up
AT1G56650	production of anthocyanin pigment 1	14.2855	8.24925	10.8707	4.43202	3.72401	1.89457	-1.69045	3.06447e-07	2.8131e-06	11.1351	3.3502	down
AT1G56720	Protein kinase superfamily protein	3.16606	2.46283	2.3733	5.44803	5.76983	6.41656	1.19189	2.57355e-09	3.4777e-08	2.6674	5.87814	up
AT1G57560	myb domain protein 50	17.7785	8.33957	17.5544	1.72349	1.5631	1.47934	-3.14896	7.32989e-23	4.63658e-21	14.5575	1.58864	down
AT1G57610	Protein of unknown function (DUF607)	62.1962	64.12	74.0047	13.6036	21.6462	21.9146	-1.7703	1.57459e-19	7.17629e-18	66.7736	19.0548	down
AT1G57630	Toll-Interleukin-Resistance (TIR) domain family protein	121.525	61.7023	116.713	22.3973	26.043	15.0142	-2.19944	2.43611e-16	8.31413e-15	99.98	21.1515	down
AT1G57640	transposable element gene	0.707772	0.298577	0.492488	0.0694184	0.0333309	0.0568761	-3.15765	1.11498e-07	1.12433e-06	0.499612	0.0532085	down
AT1G57650	ATP binding	3.24163	1.53652	2.35937	0.186047	0.463189	0.0508109	-3.35165	1.79682e-09	2.50497e-08	2.37917	0.233349	down
AT1G58170	Disease resistance-responsive (dirigent-like protein) family protein	3.87047	6.71956	6.11415	0.372619	1.32195	2.3406	-2.00097	0.000186411	0.000903251	5.56806	1.34506	down
AT1G58200	MSCS-like 3	128.068	129.698	134.066	47.4327	52.6209	49.7009	-1.34592	9.4749e-38	1.45854e-35	130.61	49.9181	down
AT1G58225		15.321	9.0881	16.8859	6.83674	6.67567	2.92922	-1.29392	0.000248166	0.00116778	13.765	5.48054	down
AT1G58340	MATE efflux family protein	2.00506	0.998255	0.979854	0.827573	0.57056	0.486805	-1.0207	0.0179372	0.047231	1.32772	0.628313	down
AT1G58520	lipases;hydrolases, acting on ester bonds	4.5449	3.97879	4.15157	9.48137	9.0795	7.52867	1.08533	1.34027e-12	3.0198e-11	4.22509	8.69651	up
AT1G58590	other RNA	13.0706	19.8999	20.421	6.97578	6.93992	8.09303	-1.2407	4.93596e-07	4.36192e-06	17.7972	7.33624	down
AT1G59810	AGAMOUS-like 50	0.467543	0.0972478	0.0450261	2.01551	2.08435	0.127027	2.87249	0.00585333	0.0183756	0.203272	1.40896	up
AT1G60430	actin-related protein C3	13.9513	10.9583	13.471	5.43794	5.95593	7.08214	-1.00526	6.40772e-07	5.53149e-06	12.7935	6.15867	down
AT1G60460		0.176237	0.164956	0.152751	1.00185	0.477022	0.513022	2.06215	0.00121571	0.00470076	0.164648	0.663963	up
AT1G60540		7.95429	6.28247	7.25312	3.16521	3.47324	3.64132	-1.01603	2.88486e-08	3.26165e-07	7.16329	3.42659	down
AT1G60590	Pectin lyase-like superfamily protein	0.290307	0.689763	0.135487	3.04352	2.53866	4.93265	3.29079	1.70004e-11	3.27984e-10	0.371852	3.50495	up
AT1G60800	NSP-interacting kinase 3	12.6435	11.4799	8.64753	28.2703	25.518	27.1304	1.35506	4.94358e-18	2.0078e-16	10.9236	26.9729	up
AT1G60890	Phosphatidylinositol-4-phosphate 5-kinase family protein	5.3398	3.78595	4.08592	11.4203	11.5297	8.8944	1.31684	1.85674e-13	4.6658e-12	4.40389	10.6148	up
AT1G61110	NAC domain containing protein 25	0.232601	0.124407	0.345606	0	0	0	-5.27076	0.00233384	0.00831443	0.234205	0	down
AT1G61120	terpene synthase 04	165.913	83.0838	194.934	7.95871	9.15466	5.11456	-4.28093	5.31521e-52	1.72064e-49	147.977	7.40931	down
AT1G61255		1.55444	2.29728	0.709098	0	0.729459	0.133367	-2.41693	0.0172652	0.0457405	1.52027	0.287609	down
AT1G61380	S-domain-1 29	51.3282	49.1603	57.2007	25.3464	24.8177	19.6621	-1.13495	6.66347e-15	1.95838e-13	52.5631	23.2754	down
AT1G61460	S-locus protein kinase, putative	8.33847	6.18609	8.07313	23.2675	20.0181	13.7604	1.38007	7.72204e-11	1.35339e-09	7.53257	19.0153	up
AT1G61470	Polynucleotidyl transferase, ribonuclease H-like superfamily protein	5.55242	3.1182	2.42915	28.6176	26.1088	12.7149	2.66052	1.36521e-14	3.86775e-13	3.69992	22.4804	up
AT1G61550	S-locus lectin protein kinase family protein	0.771816	0.361206	0.463125	0.0442969	0.165425	0.241956	-1.74963	0.00591383	0.0185365	0.532049	0.150559	down
AT1G61560	Seven transmembrane MLO family protein	31.7372	20.5655	31.8851	9.15847	9.65823	5.72654	-1.73739	3.95737e-14	1.06366e-12	28.0626	8.18108	down
AT1G61610	S-locus lectin protein kinase family protein	132.747	72.1092	125.553	40.1138	37.4117	18.1306	-1.74374	6.06174e-10	9.15835e-09	110.136	31.8854	down
AT1G61640	Protein kinase superfamily protein	21.4586	18.6858	22.7484	7.92522	8.81565	6.50874	-1.39701	4.78212e-18	1.95304e-16	20.9642	7.74987	down
AT1G61660	basic helix-loop-helix (bHLH) DNA-binding superfamily protein	101.048	85.9947	94.5314	41.737	47.8401	40.3475	-1.07271	3.39349e-20	1.62747e-18	93.8579	43.3082	down
AT1G61740	Sulfite exporter TauE/SafE family protein	133.731	167.87	171.563	50.1281	55.9317	86.1135	-1.25861	5.36503e-09	6.83848e-08	157.721	64.0578	down
AT1G61800	glucose-6-phosphate/phosphate translocator 2	65.9256	55.2104	68.4114	1.54347	1.88641	2.82811	-4.86197	9.10113e-116	2.22604e-112	63.1824	2.086	down
AT1G61810	beta-glucosidase 45	0.409347	0.574718	0.310446	0.101806	0.142571	0	-2.42524	0.00967218	0.0280926	0.431504	0.0814591	down
AT1G61830		0.16577	0.398981	0.431036	0.706759	0.976564	1.35115	1.63659	0.00205887	0.00746161	0.331929	1.01149	up
AT1G62050	Ankyrin repeat family protein	7.67238	7.90873	5.82083	2.91426	2.13221	4.88914	-1.04823	0.000394129	0.00174707	7.13398	3.31187	down
AT1G62290	Saposin-like aspartyl protease family protein	2.40627	2.38874	3.68665	8.80139	7.09741	6.39893	1.43012	1.97632e-08	2.30535e-07	2.82722	7.43257	up
AT1G62300	WRKY family transcription factor	19.7505	13.6149	19.2582	6.5051	8.50255	4.85844	-1.36737	1.16975e-09	1.68739e-08	17.5412	6.62203	down
AT1G62320	ERD (early-responsive to dehydration stress) family protein	9.27367	8.26758	11.3094	3.94565	5.16787	4.10732	-1.08975	2.84675e-08	3.22519e-07	9.61688	4.40695	down
AT1G62480	Vacuolar calcium-binding protein-related	61.9881	86.2713	54.7816	122.296	141.08	175.845	1.15679	1.5552e-08	1.85452e-07	67.6804	146.407	up
AT1G62510	Bifunctional inhibitor/lipid-transfer protein/seed storage 2S albumin superfamily protein	1.98985	0.956408	2.23741	6.58059	5.45444	6.96967	1.92127	7.36174e-08	7.71318e-07	1.72789	6.3349	up
AT1G62540	flavin-monooxygenase glucosinolate S-oxygenase 2	7.78378	9.28549	8.48819	3.31499	3.51545	4.47836	-1.1297	5.18438e-08	5.57245e-07	8.51915	3.7696	down
AT1G62560	flavin-monooxygenase glucosinolate S-oxygenase 3	25.4162	26.234	27.2625	67.695	55.5585	34.748	1.04245	2.08854e-06	1.61998e-05	26.3042	52.6672	up
AT1G62610	NAD(P)-binding Rossmann-fold superfamily protein	20.7309	18.2523	14.3425	9.11833	7.43887	7.97225	-1.06832	5.52829e-09	7.04249e-08	17.7752	8.17648	down
AT1G62620	Flavin-binding monooxygenase family protein	7.04546	5.91041	7.44947	3.11184	2.54142	3.52655	-1.1009	1.61726e-06	1.28755e-05	6.80178	3.05994	down
AT1G62660	Glycosyl hydrolases family 32 protein	102.74	75.16	93.2985	33.1684	32.7104	22.4359	-1.57425	8.54153e-19	3.65807e-17	90.3996	29.4382	down
AT1G62720	Pentatricopeptide repeat (PPR-like) superfamily protein	0.765472	1.27942	1.11367	0.244768	0.274223	0.222827	-2.06207	9.29595e-05	0.00048955	1.05285	0.247273	down
AT1G62790	Bifunctional inhibitor/lipid-transfer protein/seed storage 2S albumin superfamily protein	73.4808	73.7744	83.5411	26.5557	29.9433	29.9461	-1.37551	9.70822e-23	6.03692e-21	76.9321	28.815	down
AT1G62840	Protein of unknown function (DUF1442)	45.5239	47.5212	60.1331	13.6782	13.4831	10.6524	-1.98263	2.36696e-26	1.88782e-24	51.0594	12.6046	down
AT1G62860		5.08374	5.00598	5.20887	1.59805	2.59076	2.4492	-1.16343	2.92478e-07	2.69499e-06	5.09953	2.21267	down
AT1G62960	ACC synthase 10	4.05423	4.2438	3.30601	7.92321	7.70024	10.0895	1.19835	4.11084e-09	5.35772e-08	3.86801	8.57097	up
AT1G62975	basic helix-loop-helix (bHLH) DNA-binding superfamily protein	4.73202	3.09275	4.87925	0.162327	0.272791	0.132998	-4.47682	5.82543e-18	2.3358e-16	4.23467	0.189372	down
AT1G63100	GRAS family transcription factor	0.649246	0.314321	0.601532	1.06904	1.47216	1.67879	1.48024	0.000370581	0.00165234	0.5217	1.40666	up
AT1G63380	NAD(P)-binding Rossmann-fold superfamily protein	2.29384	3.02533	3.47926	0.570486	0.406723	0.594888	-2.43452	2.61593e-07	2.4452e-06	2.93281	0.524032	down
AT1G63400	Pentatricopeptide repeat (PPR) superfamily protein	0.714706	0.382261	0.353977	1.26964	1.8207	1.12346	1.59027	0.000316988	0.00144171	0.483648	1.4046	up
AT1G63640	P-loop nucleoside triphosphate hydrolases superfamily protein with CH (Calponin Homology) domain	2.88002	2.60544	2.16199	4.66325	5.72133	4.92075	1.04709	1.70553e-09	2.3898e-08	2.54915	5.10178	up
AT1G64170	cation/H+ exchanger 16	1.38088	0.748281	1.13386	0.307278	0.263254	0.385044	-1.7082	7.07893e-05	0.000385047	1.08767	0.318525	down
AT1G64200	vacuolar H+-ATPase subunit E isoform 3	227.286	221.252	211.971	47.6143	47.0843	65.8817	-1.99188	5.08314e-35	6.62102e-33	220.17	53.5268	down
AT1G64300	Protein kinase family protein	4.39191	4.08033	4.15908	1.29456	1.74041	1.90919	-1.30568	1.62834e-09	2.29039e-08	4.21044	1.64805	down
AT1G64360		123.82	87.9324	117.199	26.9036	30.0534	11.9825	-2.21662	2.65299e-15	8.1451e-14	109.65	22.9798	down
AT1G64380	Integrase-type DNA-binding superfamily protein	106.104	155.028	146.72	55.0101	55.7864	46.582	-1.33834	8.58635e-14	2.21584e-12	135.951	52.4595	down
AT1G64400	AMP-dependent synthetase and ligase family protein	6.35863	6.45508	7.92553	17.945	14.4949	11.0701	1.10801	1.64139e-07	1.60801e-06	6.91308	14.5033	up
AT1G64405		0.658424	0.342377	0.760903	0	0	0	-5.45289	0.00104826	0.00413833	0.587235	0	down
AT1G64460	Protein kinase superfamily protein	14.3898	12.3715	14.0486	6.71525	5.36094	5.9632	-1.12992	2.08427e-09	2.87476e-08	13.6033	6.01313	down
AT1G64510	Translation elongation factor EF1B/ribosomal protein S6 family protein	163.775	241.565	159.576	312.601	326.067	509.444	1.06699	3.06893e-06	2.30018e-05	188.305	382.704	up
AT1G64640	early nodulin-like protein 8	18.3428	13.4716	12.6623	38.433	33.1679	44.0582	1.43402	5.89354e-14	1.55858e-12	14.8256	38.553	up
AT1G64890	Major facilitator superfamily protein	12.7992	15.0624	14.8778	6.20506	6.56246	7.70727	-1.01852	7.3813e-09	9.25311e-08	14.2465	6.82493	down
AT1G65060	4-coumarate:CoA ligase 3	0.6168	1.21436	0.20278	1.2272	1.4934	2.73905	1.4793	0.00812686	0.0242473	0.67798	1.81988	up
AT1G65310	xyloglucan endotransglucosylase/hydrolase 17	0.421932	0.394924	1.38967	9.69608	10.4396	12.9652	3.92346	5.12237e-22	2.95955e-20	0.735509	11.0337	up
AT1G65450	HXXXD-type acyl-transferase family protein	3.46704	6.07151	3.51391	0.806634	0.747891	1.68642	-1.95156	8.50923e-07	7.19055e-06	4.35082	1.08032	down
AT1G65481		1.6266	0.881438	1.92924	0.425833	0.19083	0	-2.84698	0.00373007	0.0124844	1.47909	0.205554	down
AT1G65500		28.4049	29.8405	26.3832	6.32631	7.1821	2.76442	-2.35223	7.62776e-15	2.2181e-13	28.2095	5.42428	down
AT1G65510		6.17806	6.21414	7.43268	3.02714	3.90527	2.25473	-1.08452	0.00215674	0.00776645	6.60829	3.06238	down
AT1G65610	Six-hairpin glycosidases superfamily protein	2.92979	2.21339	3.33742	0.541281	0.443151	0.426427	-2.54624	1.68953e-14	4.73177e-13	2.82687	0.470286	down
AT1G65690	Late embryogenesis abundant (LEA) hydroxyproline-rich glycoprotein family	8.97293	7.18724	6.80499	1.1158	1.34623	0.105485	-3.14542	2.0622e-09	2.84966e-08	7.65505	0.855837	down
AT1G65710		0.161732	0.277529	0.0467262	0.321786	0.660934	0.659118	1.80978	0.0176084	0.0465266	0.161996	0.547279	up
AT1G65850	Disease resistance protein (TIR-NBS-LRR class) family	0.365567	0.316821	0.375525	0.18857	0.0301803	0.0220714	-2.09384	0.00839326	0.024897	0.352638	0.0802739	down
AT1G65880	benzoyloxyglucosinolate 1	0.557057	0.4266	0.526712	0.125947	0	0.0412765	-3.10496	0.000580149	0.00245249	0.503456	0.0557412	down
AT1G65890	acyl activating enzyme 12	25.6464	15.4224	25.5549	3.17774	3.94432	2.82837	-2.70329	2.02304e-32	2.28376e-30	22.2079	3.31681	down
AT1G66050	Zinc finger (C3HC4-type RING finger) family protein	0.0647717	0.202086	0.0748531	0.343657	0.481265	0.527937	2.02364	0.00486317	0.0156992	0.113904	0.450953	up
AT1G66090	Disease resistance protein (TIR-NBS class)	141.008	71.7989	105.786	247.565	256.99	130.661	1.04414	7.06929e-05	0.000384618	106.198	211.739	up
AT1G66100	Plant thionin	275.874	241.128	281	65.6547	46.9144	51.3303	-2.23681	1.9315e-43	4.16845e-41	266.001	54.6331	down
AT1G66130	NAD(P)-binding Rossmann-fold superfamily protein	7.08952	7.27494	5.3273	20.22	15.8029	17.468	1.49203	5.42043e-15	1.60592e-13	6.56392	17.8303	up
AT1G66230	myb domain protein 20	12.1288	12.6448	12.5825	2.7473	3.78499	6.63112	-1.45312	1.11497e-06	9.17871e-06	12.4521	4.3878	down
AT1G66280	Glycosyl hydrolase superfamily protein	0.284026	0.17723	0.143602	0	0	0	-5.52423	0.000719097	0.00296599	0.201619	0	down
AT1G66370	myb domain protein 113	7.58584	6.98846	6.31605	0.0594212	0.0665718	0	-7.4564	2.39988e-12	5.21506e-11	6.96345	0.0419977	down
AT1G66390	myb domain protein 90	0.224446	0.126047	0.466883	0	0.0500301	0	-4.10086	0.0179009	0.0471534	0.272459	0.0166767	down
AT1G66400	calmodulin like 23	11.329	6.44544	10.6856	21.546	22.4057	19.011	1.19099	1.89665e-07	1.82957e-06	9.48666	20.9876	up
AT1G66460	Protein kinase superfamily protein	3.8229	1.98789	2.96982	0.704272	1.38868	0.64627	-1.64934	3.05596e-05	0.000180593	2.92687	0.913074	down
AT1G66600	ABA overly sensitive mutant 3	0.684172	0.591119	0.63861	0.209423	0	0.0857924	-2.62089	0.0112775	0.0320367	0.637967	0.098405	down
AT1G66725	MIR163; miRNA	11.9623	5.40073	10.1242	1.40004	2.27434	2.17945	-2.18138	1.08103e-08	1.32351e-07	9.16243	1.95128	down
AT1G66820	glycine-rich protein	20.4879	24.6785	16.4838	45.9231	35.0703	51.7179	1.15667	2.00623e-07	1.92768e-06	20.5501	44.2371	up
AT1G66840	Plant protein of unknown function (DUF827)	2.47302	3.34349	1.88697	5.40401	6.19566	7.27027	1.33956	1.07557e-07	1.08807e-06	2.56782	6.28998	up
AT1G66920	Protein kinase superfamily protein	19.8633	18.8142	24.9822	7.21681	7.86868	3.92433	-1.7108	5.23024e-12	1.07803e-10	21.2199	6.33661	down
AT1G66960	Terpenoid cyclases family protein	2.26419	1.14597	1.52635	0.200217	0.373851	0.150372	-2.74573	5.52846e-10	8.41193e-09	1.6455	0.24148	down
AT1G67000	Protein kinase superfamily protein	7.85119	3.95245	6.35755	1.35361	1.34219	0.446166	-2.49343	2.33086e-11	4.38165e-10	6.05373	1.04732	down
AT1G67040		0.513829	0.561096	0.210306	1.27791	0.763568	1.47746	1.51886	0.000590574	0.00248953	0.42841	1.17298	up
AT1G67050		4.26609	4.49215	3.20235	8.82896	5.85843	10.5557	1.13373	5.20096e-05	0.000292138	3.98686	8.41437	up
AT1G67070	Mannose-6-phosphate isomerase, type I	2.37743	2.81707	1.90715	0.80514	0.366449	1.07196	-1.59301	0.000110561	0.000571847	2.36722	0.747851	down
AT1G67090	ribulose bisphosphate carboxylase small chain 1A	6552.66	8918.57	6419.66	12404	12660.9	18349	1.03164	1.93894e-07	1.86628e-06	7296.96	14471.3	up
AT1G67180	zinc finger (C3HC4-type RING finger) family protein / BRCT domain-containing protein	0.122098	0.714268	0.31748	1.18429	0.646389	2.28894	1.87778	0.0060877	0.0189787	0.384616	1.37321	up
AT1G67190	F-box/RNI-like superfamily protein	16.462	19.0061	20.3762	3.60229	4.31518	5.9937	-1.95965	1.22938e-18	5.2043e-17	18.6147	4.63706	down
AT1G67460	Minichromosome maintenance (MCM2/3/5) family protein	2.37696	1.84123	2.20228	5.43594	5.14612	3.18446	1.14092	4.63257e-05	0.000263778	2.14015	4.58884	up
AT1G67510	Leucine-rich repeat protein kinase family protein	13.9544	11.2008	11.633	30.8829	30.2601	21.3782	1.21071	2.50985e-12	5.44864e-11	12.2627	27.5071	up
AT1G67590	Remorin family protein	1.15848	2.7427	0.797367	4.06754	4.70891	5.47107	1.64344	8.92295e-05	0.00047262	1.56618	4.74917	up
AT1G67630	DNA polymerase alpha 2	1.19284	2.23298	1.25153	3.74733	2.61226	4.41778	1.25074	0.000185661	0.000899816	1.55912	3.59246	up
AT1G67690	Zincin-like metalloproteases family protein	2.98806	2.66084	2.24814	4.68592	4.94916	5.73355	1.01233	8.70754e-07	7.33611e-06	2.63235	5.12287	up
AT1G67750	Pectate lyase family protein	3.19045	1.49311	0.960813	4.1691	5.06254	7.00799	1.5956	3.91254e-05	0.000226292	1.88146	5.41321	up
AT1G67830	alpha-fucosidase 1	4.8278	5.6732	3.23758	7.6774	8.64055	12.2359	1.10743	5.49076e-05	0.000306538	4.57953	9.51794	up
AT1G67850	Protein of unknown function (DUF707)	41.7264	36.6627	41.8497	13.844	14.1721	11.4333	-1.56651	6.56898e-30	6.31454e-28	40.0796	13.1498	down
AT1G67865		3414.68	3264.11	4385.77	1596.2	1602.28	1069.82	-1.3365	1.52556e-12	3.40244e-11	3688.18	1422.77	down
AT1G67880	beta-1,4-N-acetylglucosaminyltransferase family protein	14.6896	9.31158	12.1144	51.9104	47.6803	26.4927	1.85025	7.92263e-14	2.05904e-12	12.0385	42.0278	up
AT1G67920		35.0675	24.0099	33.7999	13.0545	12.0639	7.19097	-1.48372	7.18338e-09	9.01526e-08	30.9591	10.7698	down
AT1G68050	flavin-binding, kelch repeat, f box 1	48.0102	50.76	52.9773	17.1707	18.3731	24.4147	-1.29527	1.12419e-14	3.21388e-13	50.5825	19.9862	down
AT1G68210	pseudo-response regulator 6	0.175638	0.127863	0.524351	0	0	0	-6.28889	5.1575e-05	0.000290141	0.275951	0	down
AT1G68240	basic helix-loop-helix (bHLH) DNA-binding superfamily protein	0	0	0.0382094	0.219278	0.196533	0.826435	4.87856	0.00271801	0.00949405	0.0127365	0.414082	up
AT1G68340	Protein of unknown function (DUF1639)	56.2094	44.893	65.2376	30.0517	28.3693	19.5124	-1.05429	2.93845e-07	2.70645e-06	55.4467	25.9778	down
AT1G68440		52.4994	52.6774	53.602	19.0884	26.0362	22.035	-1.20179	5.14006e-17	1.8858e-15	52.9263	22.3865	down
AT1G68470	Exostosin family protein	4.8891	2.61109	3.29033	0.400543	0.705168	0.93764	-2.33553	2.2062e-09	3.02775e-08	3.59684	0.681117	down
AT1G68490		29.5623	39.6614	32.9393	11.8887	10.9949	19.7782	-1.21327	5.68116e-07	4.95089e-06	34.0543	14.2206	down
AT1G68500		17.1304	31.9863	20.7261	1.47059	2.71362	6.16618	-2.70012	6.59136e-10	9.89063e-09	23.2809	3.45013	down
AT1G68620	alpha/beta-Hydrolases superfamily protein	5.91739	4.19398	6.40358	1.02081	1.02929	0.808497	-2.49444	1.07127e-15	3.41767e-14	5.50498	0.952867	down
AT1G68765	Putative membrane lipoprotein	3.96364	1.08206	1.71771	0.410738	0.368132	1.07689	-1.76628	0.0157678	0.0423392	2.25447	0.618586	down
AT1G68780	RNI-like superfamily protein	0.398956	0.878634	0.488172	1.77432	1.51703	3.34743	1.95748	1.61894e-05	0.00010285	0.588587	2.21293	up
AT1G68795	CLAVATA3/ESR-RELATED 12	3.60519	4.62037	5.3361	1.87601	1.35997	2.44121	-1.20516	0.00111258	0.00435089	4.52055	1.8924	down
AT1G68890	magnesium ion binding;thiamin pyrophosphate binding;hydro-lyases;catalytics;2-succinyl-5-enolpyruvyl-6-hydroxy-3-cyclohexene-1-carboxylic-acid synthases	11.702	10.0163	7.31835	22.2377	20.0102	20.1342	1.15532	4.01095e-12	8.40085e-11	9.67887	20.794	up
AT1G69140		1.75538	1.87774	0.869399	12.7229	10.3411	10.9351	2.97626	2.25936e-13	5.6198e-12	1.50084	11.333	up
AT1G69160		2.80049	3.46485	1.72979	0.288204	0.64577	1.33808	-1.74915	0.000746332	0.00306855	2.66504	0.757352	down
AT1G69170	Squamosa promoter-binding protein-like (SBP domain) transcription factor family protein	4.98508	5.6173	4.55145	2.16665	2.29252	2.78112	-1.01602	5.92263e-06	4.17333e-05	5.05127	2.41343	down
AT1G69350	Tetratricopeptide repeat (TPR)-like superfamily protein	1.3106	1.96273	1.67145	0.428391	0.709479	1.19032	-1.03779	0.0117885	0.0332053	1.64826	0.776062	down
AT1G69440	Argonaute family protein	0.756114	0.301434	0.412627	1.61582	1.04558	1.50648	1.57064	5.44493e-05	0.00030452	0.490059	1.3893	up
AT1G69520	S-adenosyl-L-methionine-dependent methyltransferases superfamily protein	11.2045	15.1832	15.6541	3.38274	5.96429	3.40765	-1.69773	2.98714e-09	4.00463e-08	14.0139	4.25156	down
AT1G69526	S-adenosyl-L-methionine-dependent methyltransferases superfamily protein	2.01326	1.5365	2.04026	4.74513	3.31396	4.51893	1.22015	1.59777e-05	0.000101681	1.86334	4.19267	up
AT1G69580	Homeodomain-like superfamily protein	15.3693	21.0942	15.5306	4.33695	5.68238	8.88342	-1.41245	2.7345e-07	2.54463e-06	17.3314	6.30092	down
AT1G69610	Protein of unknown function (DUF1666)	14.2428	10.1196	15.7302	3.26315	2.81403	2.86706	-2.11949	2.60804e-23	1.71375e-21	13.3642	2.98141	down
AT1G69760		33.5392	56.9808	53.9295	19.9644	22.0945	20.7641	-1.16806	4.77666e-08	5.17209e-07	48.1498	20.941	down
AT1G69870	nitrate transporter 1.7	253.595	273.552	289.106	69.7549	67.4499	58.2838	-2.02163	7.56158e-55	2.72874e-52	272.084	65.1628	down
AT1G69930	glutathione S-transferase TAU 11	8.86903	3.281	6.77196	1.89065	1.88281	0.826161	-2.00004	2.57182e-06	1.95759e-05	6.30733	1.53321	down
AT1G69950	transposable element gene	4.98033	6.48481	4.76917	1.798	2.37248	3.09361	-1.11297	1.63645e-05	0.000103723	5.41144	2.42136	down
AT1G70140	formin 8	36.4141	33.3101	37.195	9.1992	9.00542	6.16141	-2.09418	3.2572e-34	4.00563e-32	35.6397	8.12201	down
AT1G70210	CYCLIN D1;1	4.33842	4.92209	2.86767	8.54465	8.35186	14.341	1.41852	2.67056e-07	2.49097e-06	4.04273	10.4125	up
AT1G70260	nodulin MtN21 /EamA-like transporter family protein	0.816841	0.877823	0.629319	0.0300965	0.134873	0.123294	-2.96233	6.30181e-05	0.000347935	0.774661	0.0960876	down
AT1G70280	NHL domain-containing protein	10.8106	11.8422	7.75506	23.4272	23.0109	22.6731	1.23218	6.44645e-13	1.50483e-11	10.136	23.0371	up
AT1G70430	Protein kinase superfamily protein	1.13172	0.789647	0.285354	1.71949	1.5136	1.4759	1.16041	0.00915137	0.026792	0.735575	1.56966	up
AT1G70518		15.0036	12.8304	15.5459	5.90248	6.84079	7.61536	-1.0446	2.14749e-06	1.66102e-05	14.46	6.78621	down
AT1G70690	Receptor-like protein kinase-related family protein	12.3065	10.3901	12.3878	4.97467	6.0081	3.64226	-1.22806	2.95744e-08	3.32833e-07	11.6948	4.87501	down
AT1G70700	TIFY domain/Divergent CCT motif family protein	1119.58	1128.74	1254.45	535.329	556.868	434.905	-1.15767	6.65011e-18	2.64718e-16	1167.59	509.034	down
AT1G70740	Protein kinase superfamily protein	25.4505	15.8885	22.7285	85.2998	82.6736	50.502	1.81533	3.87807e-16	1.29739e-14	21.3558	72.8252	up
AT1G70750	Protein of unknown function, DUF593	18.1563	14.4443	17.4232	6.61137	8.32449	7.50306	-1.11342	1.04515e-13	2.67833e-12	16.6746	7.47964	down
AT1G70830	MLP-like protein 28	417.211	250.303	354.513	87.4026	77.2647	71.2867	-2.06525	1.89176e-30	1.85908e-28	340.676	78.6513	down
AT1G70985	hydroxyproline-rich glycoprotein family protein	0.144172	0.269886	0.562313	2.22307	3.05298	5.69926	3.50936	1.02315e-07	1.04126e-06	0.325457	3.65843	up
AT1G71050	Heavy metal transport/detoxification superfamily protein	5.58939	7.01802	4.21433	2.35074	1.82327	3.88906	-1.00002	0.00508203	0.0163119	5.60725	2.68769	down
AT1G71130	Integrase-type DNA-binding superfamily protein	17.8711	16.8944	18.6906	6.69652	5.64337	10.2449	-1.18849	2.82728e-06	2.1402e-05	17.8187	7.52827	down
AT1G71390	receptor like protein 11	0.169149	0.0175913	0.179187	0	0	0	-5.1404	0.00668153	0.0205162	0.121976	0	down
AT1G71450	Integrase-type DNA-binding superfamily protein	0.56466	0.121965	0.301175	2.07409	2.08163	2.15959	2.74311	4.81835e-07	4.26484e-06	0.329267	2.1051	up
AT1G71520	Integrase-type DNA-binding superfamily protein	8.74567	4.05734	7.58016	0.302619	0.76283	0.495886	-3.67523	8.57136e-13	1.98195e-11	6.79439	0.520445	down
AT1G71780		21.0788	22.0112	24.401	8.03592	8.20386	11.4149	-1.23989	1.40322e-09	1.99801e-08	22.497	9.21822	down
AT1G71880	sucrose-proton symporter 1	152.365	195.909	191.356	39.7121	41.715	43.9725	-2.0664	2.84691e-43	6.08438e-41	179.877	41.7999	down
AT1G71910		4.22568	3.30279	3.77581	1.69017	1.06816	1.49132	-1.35502	4.68212e-05	0.000266393	3.76809	1.41655	down
AT1G72000	Plant neutral invertase family protein	0.0590143	0.138092	0.358047	0	0	0	-5.12523	0.00581258	0.0182789	0.185051	0	down
AT1G72030	Acyl-CoA N-acyltransferases (NAT) superfamily protein	6.49157	8.33154	5.20021	21.9666	22.4176	23.1686	1.80033	1.89415e-18	7.95722e-17	6.67444	22.5176	up
AT1G72060	serine-type endopeptidase inhibitors	18.3379	13.6594	11.7333	2.76985	4.60125	6.33868	-1.61253	1.89002e-06	1.48377e-05	14.5769	4.56993	down
AT1G72070	Chaperone DnaJ-domain superfamily protein	11.2052	12.7021	9.11844	4.27306	4.64851	5.42911	-1.15204	3.4464e-06	2.54668e-05	11.0086	4.78356	down
AT1G72120	Major facilitator superfamily protein	33.7616	27.4096	35.1728	9.9326	10.1527	5.80987	-1.85745	1.13417e-17	4.42669e-16	32.1147	8.63173	down
AT1G72130	Major facilitator superfamily protein	10.1337	12.4172	10.2231	3.98995	2.72437	5.10669	-1.41848	1.04507e-08	1.28305e-07	10.9246	3.94034	down
AT1G72180	Leucine-rich receptor-like protein kinase family protein	137.673	129.056	137.647	48.6511	57.279	65.8058	-1.19141	5.53905e-18	2.23317e-16	134.792	57.2453	down
AT1G72230	Cupredoxin superfamily protein	1.73571	4.33229	2.17302	7.33852	3.97647	6.13051	1.12457	0.00537398	0.0171024	2.74701	5.81517	up
AT1G72240		4.26329	3.55508	3.76232	22.7481	23.9305	12.3833	2.39047	1.08313e-15	3.44845e-14	3.86023	19.6873	up
AT1G72250	Di-glucose binding protein with Kinesin motor domain	1.28259	1.08258	0.873448	2.10757	2.05487	2.26815	1.04312	4.01663e-06	2.93261e-05	1.07954	2.14353	up
AT1G72260	thionin 2.1	1.85062	3.0794	4.9011	0	0	0	-8.45917	5.88819e-11	1.04699e-09	3.27704	0	down
AT1G72270		0.314784	0.222184	0.18338	0.657104	0.506122	0.975815	1.63492	2.23932e-06	1.72719e-05	0.240116	0.713014	up
AT1G72280	endoplasmic reticulum oxidoreductins 1	43.131	35.5295	41.6479	22.028	21.8808	13.7918	-1.01869	9.5569e-08	9.77498e-07	40.1028	19.2336	down
AT1G72410	COP1-interacting protein-related	6.45227	6.05897	4.53413	11.1936	10.8983	11.7965	1.04169	2.87206e-11	5.32625e-10	5.68179	11.2961	up
AT1G72470	exocyst subunit exo70 family protein D1	15.2491	19.3316	22.7596	6.3958	5.50844	8.85926	-1.42302	1.13454e-09	1.64199e-08	19.1135	6.92117	down
AT1G72645		9.81226	11.8999	7.3158	17.476	14.9341	27.046	1.08724	7.88852e-05	0.000423124	9.676	19.8187	up
AT1G72910	Toll-Interleukin-Resistance (TIR) domain-containing protein	7.57419	2.85909	3.32292	97.1475	91.8157	55.079	4.21055	1.10908e-17	4.34415e-16	4.5854	81.3474	up
AT1G72920	Toll-Interleukin-Resistance (TIR) domain family protein	4.79836	2.28432	2.68894	40.4922	36.3288	25.961	3.45232	9.35566e-39	1.49236e-36	3.25721	34.2607	up
AT1G72940	Toll-Interleukin-Resistance (TIR) domain-containing protein	15.9629	8.96465	10.9427	51.4226	52.1762	29.9961	1.94691	1.75996e-15	5.47979e-14	11.9567	44.5316	up
AT1G72950	Disease resistance protein (TIR-NBS class)	1.25394	0.856466	0.822467	3.54002	4.45705	2.8728	1.93648	6.42553e-09	8.1197e-08	0.977624	3.62329	up
AT1G72970	Glucose-methanol-choline (GMC) oxidoreductase family protein	9.43294	13.4172	6.15866	15.3873	16.3208	27.5982	1.08136	0.000230127	0.001092	9.66961	19.7688	up
AT1G73320	S-adenosyl-L-methionine-dependent methyltransferases superfamily protein	2.94209	1.84593	1.70935	4.56714	4.50417	3.87372	1.04894	0.000175424	0.000856995	2.16579	4.31501	up
AT1G73325	Kunitz family trypsin and protease inhibitor protein	34.6676	53.1932	36.4126	10.7281	7.29991	16.9863	-1.77612	3.7932e-09	4.96727e-08	41.4245	11.6714	down
AT1G73330	drought-repressed 4	3.14251	7.70553	4.06639	0.0440311	0	0	-8.30637	4.13213e-11	7.48647e-10	4.97148	0.014677	down
AT1G73360	homeodomain GLABROUS 11	0.288625	0.256643	0.100064	0.660395	0.466436	0.611652	1.49728	0.00337747	0.0114824	0.215111	0.579494	up
AT1G73390	Endosomal targeting BRO1-like domain-containing protein	12.2801	11.5163	11.7943	27.0271	23.7004	22.3372	1.08227	6.60754e-15	1.94454e-13	11.8636	24.3549	up
AT1G73500	MAP kinase kinase 9	16.394	17.1007	16.8485	55.9645	48.4384	41.19	1.57442	2.51546e-24	1.79782e-22	16.7811	48.531	up
AT1G73540	nudix hydrolase homolog 21	121.881	77.0308	91.7287	768.59	732.071	430.315	2.78052	3.7422e-36	5.14856e-34	96.88	643.659	up
AT1G73805	Calmodulin binding protein-like	43.7893	30.8623	36.2285	112.292	128.082	88.4388	1.61368	8.26723e-22	4.67832e-20	36.96	109.604	up
AT1G73810	Core-2/I-branching beta-1,6-N-acetylglucosaminyltransferase family protein	14.8145	10.1001	11.8363	5.21581	7.8479	2.98146	-1.15933	0.000118148	0.000604271	12.2503	5.34839	down
AT1G73830	BR enhanced expression 3	0.16408	0.575916	0.0355535	0.571303	0.502898	4.48021	2.90336	0.00279712	0.00974257	0.258517	1.85147	up
AT1G74000	strictosidine synthase 3	2.32137	1.81065	1.8108	0.423376	0.603685	0.756833	-1.67636	0.000115216	0.000592168	1.98094	0.594631	down
AT1G74010	Calcium-dependent phosphotriesterase superfamily protein	12.083	8.35927	14.4285	3.00509	2.85439	3.23825	-1.89287	4.31837e-14	1.15505e-12	11.6236	3.03258	down
AT1G74088		1.62185	0.7835	0.725527	2.49822	2.97377	2.55856	1.4202	0.00120726	0.00466971	1.04362	2.67685	up
AT1G74290	alpha/beta-Hydrolases superfamily protein	0.436261	0.296972	0.481246	1.34145	1.28186	0.54954	1.41593	0.0189873	0.0495222	0.404827	1.05762	up
AT1G74310	heat shock protein 101	23.1722	12.2123	13.9995	6.32991	6.4526	6.25768	-1.31932	8.3161e-10	1.22778e-08	16.4613	6.34673	down
AT1G74360	Leucine-rich repeat protein kinase family protein	38.6049	22.2592	37.0165	16.5239	18.8145	10.2944	-1.05842	1.44268e-05	9.29402e-05	32.6269	15.2109	down
AT1G74660	mini zinc finger 1	4.16949	2.77685	2.71037	1.9144	0.983019	0.980318	-1.26218	0.0101647	0.0293259	3.2189	1.29258	down
AT1G74670	Gibberellin-regulated family protein	42.5688	52.893	34.0215	188.176	172.956	145.958	2.0139	2.35669e-28	2.11166e-26	43.1611	169.03	up
AT1G74930	Integrase-type DNA-binding superfamily protein	26.5178	7.80716	11.4084	92.427	93.8768	32.6175	2.31977	0.000306892	0.00140245	15.2445	72.9738	up
AT1G74940	Protein of unknown function (DUF581)	11.2944	14.6215	16.6544	2.40767	3.55566	5.94786	-1.79326	1.57559e-08	1.87681e-07	14.1901	3.9704	down
AT1G75020	lysophosphatidyl acyltransferase 4	11.9456	9.1987	11.8387	24.1224	26.0705	21.6842	1.16658	4.53873e-14	1.21104e-12	10.9943	23.959	up
AT1G75040	pathogenesis-related gene 5	41.1895	38.2994	44.3906	6.38002	12.7854	9.31342	-2.08612	1.44686e-20	7.23858e-19	41.2932	9.49296	down
AT1G75190		0.627811	2.15463	0.952254	3.59119	2.62392	4.26427	1.52838	0.00196475	0.00715467	1.2449	3.49313	up
AT1G75230	DNA glycosylase superfamily protein	36.43	32.9827	37.6983	96.4168	95.6553	55.1542	1.24704	1.17737e-09	1.69727e-08	35.7036	82.4088	up
AT1G75290	NAD(P)-binding Rossmann-fold superfamily protein	5.50368	5.97388	5.49177	2.66855	3.09277	2.48798	-1.00354	9.15056e-05	0.000483094	5.65644	2.74977	down
AT1G75450	cytokinin oxidase 5	31.7221	31.7698	43.7677	7.17881	7.42402	7.05279	-2.27035	1.52513e-38	2.4153e-36	35.7532	7.21854	down
AT1G75460	ATP-dependent protease La (LON) domain protein	47.37	55.8467	44.5892	97.2949	93.5137	103.6	1.03832	1.55137e-14	4.36704e-13	49.2686	98.1362	up
AT1G75540	salt tolerance homolog2	12.9813	10.2438	12.4483	3.67498	5.61789	6.5848	-1.12023	2.94876e-06	2.2207e-05	11.8911	5.29256	down
AT1G75580	SAUR-like auxin-responsive protein family	4.25346	6.00065	5.98408	0.490597	0.274817	1.00489	-3.11123	1.1571e-10	1.97146e-09	5.41273	0.590103	down
AT1G75640	Leucine-rich receptor-like protein kinase family protein	0.0123426	0.173289	0.0106978	0.454309	0.46771	0.462767	2.85237	0.000527438	0.00225841	0.0654431	0.461595	up
AT1G75690	DnaJ/Hsp40 cysteine-rich domain superfamily protein	107.048	141.79	104.605	213.341	201.767	288.8	1.03854	5.15599e-08	5.54736e-07	117.815	234.636	up
AT1G75780	tubulin beta-1 chain	1.72231	1.58648	0.75824	2.77404	2.55941	5.9272	1.53495	0.000252557	0.00118566	1.35568	3.75355	up
AT1G75800	Pathogenesis-related thaumatin superfamily protein	100.945	120.434	104.624	39.2394	42.8157	55.9449	-1.19647	1.77601e-12	3.92917e-11	108.668	46	down
AT1G75810		18.0065	18.7986	22.1006	9.64551	11.9289	7.18435	-1.00383	1.34404e-05	8.72495e-05	19.6352	9.58627	down
AT1G75860		259.188	242.285	274.865	73.9015	87.2978	83.6932	-1.62272	4.91982e-42	9.66965e-40	258.78	81.6308	down
AT1G75900	GDSL-like Lipase/Acylhydrolase superfamily protein	5.84279	6.52727	6.69773	19.7812	14.3543	14.4917	1.39296	4.29281e-12	8.96561e-11	6.35593	16.2091	up
AT1G76060	LYR family of Fe/S cluster biogenesis protein	22.867	24.2718	23.5997	9.20491	11.0351	11.4328	-1.11569	1.71232e-10	2.82438e-09	23.5795	10.5576	down
AT1G76065	LYR family of Fe/S cluster biogenesis protein	3.95004	4.8822	7.28619	2.56932	2.08833	2.51787	-1.13042	0.00104076	0.00411018	5.37281	2.39184	down
AT1G76070		55.8476	46.8502	62.1905	24.0918	29.0764	22.2613	-1.08938	2.0637e-11	3.91623e-10	54.9628	25.1432	down
AT1G76110	HMG (high mobility group) box protein with ARID/BRIGHT DNA-binding domain	5.12054	6.88962	4.49362	10.379	11.521	14.7381	1.19662	2.73237e-07	2.54431e-06	5.50126	12.2127	up
AT1G76185		8.70702	10.0901	9.38841	2.88729	3.69684	4.09759	-1.35488	4.13265e-08	4.535e-07	9.39517	3.56057	down
AT1G76210	Arabidopsis protein of unknown function (DUF241)	0	0.040143	0.0743454	0.725319	0.956001	0.139828	3.96151	0.00183195	0.00671551	0.0381628	0.607049	up
AT1G76240	Arabidopsis protein of unknown function (DUF241)	5.2211	4.8869	5.27952	1.21981	2.55686	2.74033	-1.1949	0.000260488	0.0012164	5.12917	2.17233	down
AT1G76270	O-fucosyltransferase family protein	15.4951	16.0011	19.2319	5.63008	7.15585	6.91928	-1.3255	1.6163e-14	4.53822e-13	16.9094	6.5684	down
AT1G76310	CYCLIN B2;4	1.57722	1.56853	0.797433	2.90926	2.3438	4.28516	1.33783	0.000490417	0.00211719	1.31439	3.17941	up
AT1G76380	DNA-binding bromodomain-containing protein	22.7361	16.9071	20.7936	6.77898	8.72793	5.97735	-1.45198	1.02678e-15	3.28524e-14	20.1456	7.16142	down
AT1G76390	ARM repeat superfamily protein	43.2555	38.4457	52.4364	16.5847	18.3909	15.2143	-1.37935	2.36295e-18	9.87013e-17	44.7125	16.73	down
AT1G76470	NAD(P)-binding Rossmann-fold superfamily protein	3.52032	1.85343	3.17831	0.0729596	0.326957	0.0896662	-4.14535	3.40466e-12	7.22726e-11	2.85069	0.163194	down
AT1G76520	Auxin efflux carrier family protein	43.8554	33.7598	41.5988	21.1084	19.7125	16.4452	-1.01342	1.13705e-10	1.93879e-09	39.738	19.0887	down
AT1G76540	cyclin-dependent kinase B2;1	3.70493	3.7774	2.60909	6.08801	6.3782	7.46859	1.0341	1.03199e-05	6.90073e-05	3.36381	6.64493	up
AT1G76560	CP12 domain-containing protein 3	15.3918	12.7522	19.3407	8.1322	6.48427	6.84298	-1.10354	1.1416e-05	7.54886e-05	15.8283	7.15315	down
AT1G76600		86.2113	53.3196	63.3497	230.681	225.537	142.458	1.61018	2.85458e-14	7.76734e-13	67.6269	199.558	up
AT1G76610	Protein of unknown function, DUF617	3.68839	4.74691	4.39567	1.73271	1.37027	2.08771	-1.25374	0.000223459	0.00106311	4.27699	1.73023	down
AT1G76620	Protein of unknown function, DUF547	8.01347	8.30195	8.46785	17.8003	17.3241	20.6684	1.21523	7.70326e-16	2.4937e-14	8.26109	18.5976	up
AT1G76640	Calcium-binding EF-hand family protein	10.0509	2.58922	21.339	0.366926	0.822161	0.676419	-4.16025	8.26472e-10	1.22183e-08	11.3264	0.621836	down
AT1G76650	calmodulin-like 38	444.221	316.263	444.412	906.078	888.384	581.58	1.023	1.58679e-07	1.55595e-06	401.632	792.014	up
AT1G76680	12-oxophytodienoate reductase 1	309.503	257.394	351.658	120.991	129.511	108.203	-1.31557	6.42524e-19	2.80632e-17	306.185	119.568	down
AT1G76690	12-oxophytodienoate reductase 2	12.5279	12.8088	15.4996	4.63658	5.59978	5.81953	-1.30609	2.71729e-11	5.06056e-10	13.6121	5.35197	down
AT1G76740		0.397296	0.203641	0.0573916	0.395235	0.875051	0.732462	1.67484	0.00345245	0.0116885	0.219443	0.667583	up
AT1G76790	O-methyltransferase family protein	80.2141	75.4888	90.4252	29.0753	32.9489	24.3155	-1.4731	3.89178e-22	2.27845e-20	82.0427	28.7799	down
AT1G76800	Vacuolar iron transporter (VIT) family protein	4.97362	5.3386	4.66674	0.726286	2.28849	2.30587	-1.45079	0.000298816	0.00137079	4.99299	1.77355	down
AT1G76930	extensin 4	31.0145	8.46531	13.4233	3.86168	4.10337	3.588	-2.13043	1.11712e-08	1.3639e-07	17.6344	3.85102	down
AT1G76952	inflorescence deficient in abscission (IDA)-like 5	4.33533	4.34093	6.81607	0	0	0.164354	-6.30784	3.10105e-08	3.48283e-07	5.16411	0.0547847	down
AT1G76960		77.9125	69.0815	108.363	31.5481	21.6135	7.62425	-2.03394	0.000533553	0.00228016	85.1191	20.2619	down
AT1G76980		44.0906	36.6521	49.2702	14.8039	13.1735	8.45578	-1.79673	3.88853e-16	1.29891e-14	43.3376	12.1444	down
AT1G76990	ACT domain repeat 3	46.1334	49.7206	47.3506	18.7703	18.4706	21.78	-1.234	1.28217e-20	6.44393e-19	47.7349	19.6736	down
AT1G77020	DNAJ heat shock N-terminal domain-containing protein	4.69741	4.15095	2.73113	7.05311	7.51164	9.01298	1.08126	6.19126e-06	4.34316e-05	3.85983	7.85924	up
AT1G77110	Auxin efflux carrier family protein	1.06081	1.24642	0.743378	2.08817	1.48417	2.33637	1.01044	0.00337882	0.0114852	1.01687	1.96957	up
AT1G77400		3.40144	2.94788	3.60328	1.58746	1.77849	0.92414	-1.18705	0.000861627	0.00347954	3.31753	1.43003	down
AT1G77450	NAC domain containing protein 32	49.9666	44.3946	49.3179	15.6888	17.7975	12.5312	-1.6039	3.39958e-24	2.42184e-22	47.8931	15.3392	down
AT1G77520	O-methyltransferase family protein	4.32691	5.31555	5.88585	2.86964	2.61216	1.78787	-1.06417	0.000119446	0.000610062	5.17611	2.42322	down
AT1G77530	O-methyltransferase family protein	2.52819	2.26912	2.22129	0.861329	0.270194	0.197598	-2.35914	9.07912e-06	6.1344e-05	2.33953	0.44304	down
AT1G77580	Plant protein of unknown function (DUF869)	2.04681	1.76937	1.11866	5.27855	5.15818	4.28233	1.6292	2.59555e-12	5.61256e-11	1.64495	4.90635	up
AT1G77640	Integrase-type DNA-binding superfamily protein	6.45763	5.51485	8.21172	23.352	26.1095	10.8727	1.61267	2.16568e-07	2.06556e-06	6.72807	20.1114	up
AT1G77680	Ribonuclease II/R family protein	69.878	75.2719	76.874	9.49085	11.813	18.46	-2.43664	2.63661e-28	2.34031e-26	74.008	13.2546	down
AT1G77690	like AUX1 3	4.86945	2.78263	2.24353	7.08781	9.19754	7.9588	1.35037	6.1139e-07	5.30699e-06	3.29854	8.08138	up
AT1G77730	Pleckstrin homology (PH) domain superfamily protein	0.332787	0.571057	0.865313	0.0551768	0	0	-4.914	0.00135664	0.00517121	0.589719	0.0183923	down
AT1G77855		2.59013	1.56869	2.07988	5.5702	4.75467	3.75659	1.22227	4.73203e-05	0.000269005	2.07956	4.69382	up
AT1G77885		10.8212	8.34112	10.4089	3.63056	2.50669	2.3866	-1.74933	7.10389e-12	1.43994e-10	9.85707	2.84128	down
AT1G78080	related to AP2 4	334.199	301.661	359.428	132.986	144.502	151.063	-1.17272	6.52286e-22	3.73926e-20	331.762	142.85	down
AT1G78100	F-box family protein	62.2941	80.2148	81.7598	21.6147	20.2858	28.4664	-1.63031	1.758e-17	6.74196e-16	74.7562	23.4556	down
AT1G78210	alpha/beta-Hydrolases superfamily protein	42.2631	44.3972	46.1705	16.8721	19.2953	19.1233	-1.22302	4.0782e-19	1.79907e-17	44.2769	18.4302	down
AT1G78240	S-adenosyl-L-methionine-dependent methyltransferases superfamily protein	114.789	126.894	129.042	46.7113	48.5969	43.5392	-1.37675	1.1946e-30	1.19531e-28	123.575	46.2824	down
AT1G78260	RNA-binding (RRM/RBD/RNP motifs) family protein	0.595005	0.592849	0.182994	0.801954	1.77553	2.01811	1.80394	0.00036357	0.00162559	0.456949	1.53186	up
AT1G78310	VQ motif-containing protein	4.78066	7.2602	6.31138	1.29133	2.39944	2.03861	-1.64738	4.98743e-08	5.37387e-07	6.11741	1.90979	down
AT1G78320	glutathione S-transferase TAU 23	4.40994	2.91956	3.07644	1.44452	1.79817	1.62187	-1.04721	0.00330391	0.0112601	3.46864	1.62152	down
AT1G78430	ROP interactive partner 2	0.20655	0.303802	0.434772	0.469665	0.920821	1.56328	1.67922	0.00722443	0.0219453	0.315041	0.984589	up
[truncated: 2,296 more rows]

## Sheet: C1vsOS1
DEGs between OESAD2/Col-0 and Col-0 one day after inoculation of Pst DC3000
[truncated: 989 more rows]

## Sheet: C2vsOS2
DEGs between OESAD2/Col-0 and Col-0 two days after inoculation of Pst DC3000
[truncated: 472 more rows]

[truncated: 1 more sheets: C3vsOS3]
