# Supplementary material for: Transcriptomic Analysis Revealed Key Defense Genes and Signaling Pathways Mediated by the Arabidopsis thaliana Gene SAD2 in Response to Infection with Pseudomonas syringae pv. Tomato DC3000
Source: Int J Mol Sci. 2023 Feb 20;24(4):4229. doi: 10.3390/ijms24044229 (PMC9963955; doi:10.3390/ijms24044229)
Supplement: Supplementary file 1 [file ijms-24-04229-s001.zip › Table S2.xlsx]

## Sheet: Sheet1
Table S2. Average transcripts per million tags (TPM) values for the 45 putative SAD2-mediated defense-response genes in SAD2 knockout and overexpression lines (sad2-5 and OESAD2/Col-0, respectively) compared to wild-type Col-0 plants after infection with Pseudomonas syringae pv. tomato DC3000
GeneID	Short_description	s0	s1	s2	s3	OES0	OES1	OES2	OES3
AT5G21960	Integrase-type DNA-binding superfamily protein	6.27374	0.641668	3.51706	2.35261	7.0442	0.367846	3.84418	2.70763
AT2G38530	lipid transfer protein 2	54.0858	43.0204	5.07288	19.2676	8.67983	119.653	7.30968	7.9608
AT5G46871	Putative membrane lipoprotein	4.5646	29.3758	32.3864	43.3304	2.26286	11.5208	11.5235	16.4364
AT3G51240	flavanone 3-hydroxylase	1.39672	1.88268	3.33918	17.3193	2.23907	0.814834	1.11008	9.78971
AT5G22460	alpha/beta-Hydrolases superfamily protein	3.51289	2.1405	6.36205	7.34663	6.37548	1.31145	3.03527	3.62154
AT5G24640		6.93828	7.0929	9.65942	5.6501	5.19812	6.75123	5.2845	4.6727
AT4G14090	UDP-Glycosyltransferase superfamily protein	4.84446	5.42143	18.5485	92.7796	4.41638	1.62706	4.50354	27.5801
AT5G64750	Integrase-type DNA-binding superfamily protein	129.779	2.02936	3.24522	2.42016	65.8817	3.84711	1.78483	1.35576
AT1G59359	Ribosomal protein S5 family protein	0.204265	1.25185	0.084573	0.481265	0.053371	0.0473467	0.0131615	0.231008
AT1G65060	4-coumarate:CoA ligase 3	0.368682	0.197652	0.460012	2.25442	1.81988	0.126474	0.149878	0.818574
AT4G22880	leucoanthocyanidin dioxygenase	0.171662	2.47792	10.4472	84.8446	0.126325	0.399558	2.0154	24.4018
AT3G43930	BRCT domain-containing DNA repair protein	0.28528	1.11809	0.952288	0.450592	0.0712452	0.109734	0.469266	0.21815
AT1G12940	nitrate transporter2.5	0.0149773	7.35356	3.19252	6.83191	0	2.4476	0.85486	1.35538
AT5G38910	RmlC-like cupins superfamily protein	0	17.2189	12.8431	2.11683	0	2.99992	3.8406	2.15728
AT5G13930	Chalcone and stilbene synthase family protein	1.14675	6.90203	21.9166	143.714	3.03029	2.90343	5.28679	38.282
AT5G57560	Xyloglucan endotransglucosylase/hydrolase family protein	1826.21	9.31719	34.7963	41.8869	2182.6	11.9269	13.1769	18.0782
AT2G01008		2.00185	3.06469	7.6199	14.2935	0.329813	0.583451	1.73042	3.11852
AT3G20100	cytochrome P450, family 705, subfamily A, polypeptide 19	10.1288	9.53509	11.1306	27.0761	6.77187	2.47066	6.92617	14.3046
AT3G17520	Late embryogenesis abundant protein (LEA) family protein	0	0.39106	14.3449	6.63599	0	0.0115849	0.268709	0.418674
AT1G27020		21.9142	15.6177	49.5426	145.337	2.18122	4.18482	40.5465	161.685
AT5G07990	Cytochrome P450 superfamily protein	2.0134	0.740335	2.74089	16.9299	2.35036	0.546623	0.563293	5.69914
AT1G23052		1.90926	2.09913	1.84007	4.06159	1.48664	0.766554	1.00567	2.24037
AT1G52690	Late embryogenesis abundant protein (LEA) family protein	0.293349	7.91955	178.531	115.328	0.162458	4.42672	6.5377	10.9336
AT3G51238	other RNA	1.15179	1.61797	3.12339	17.6133	1.85735	0.831069	1.08406	8.85404
AT4G28940	Phosphorylase superfamily protein	0.0595345	1.36045	5.92046	20.6476	0	2.17408	22.1724	34.3599
AT5G19890	Peroxidase superfamily protein	0.063782	0.661725	0.296587	0.457823	0.00932189	1.5953	3.27668	1.45378
AT1G61110	NAC domain containing protein 25	0.0102951	0.854985	1.11467	1.27286	0	1.94937	1.86653	3.40487
AT3G25573		0.262207	1.38434	1.73189	0.979191	0.292941	4.17122	2.199	0.536072
AT1G66100	Plant thionin	43.9148	36.8818	9.35283	4.78393	54.6331	163.817	61.0337	42.5532
AT5G24780	vegetative storage protein 1	109.741	10.2442	60.0614	31.5008	41.148	53.5006	229.864	124.526
AT4G01390	TRAF-like family protein	1.39913	4.41061	1.95539	6.55158	0.0487609	0.0351477	1.22502	10.9514
AT3G41979	rRNA	21.7687	14.1234	12.4475	41.7471	96.9004	89.8498	118.013	132.91
AT1G10586	basic helix-loop-helix (bHLH) DNA-binding superfamily protein	0.240942	1.31255	2.04427	3.65699	0.0190364	1.85879	4.48623	4.14989
AT4G23560	glycosyl hydrolase 9B15	0.00756795	0.0504509	0.277673	1.5608	0.0161998	0.260569	5.66835	3.50928
AT4G13410	Nucleotide-diphospho-sugar transferases superfamily protein	6.46207	0.388452	0.426154	1.68731	3.58168	3.92134	3.07511	8.2337
AT1G04800	glycine-rich protein	23.0056	3.89658	1.3396	2.32047	105.222	29.5748	10.4336	10.1394
AT2G15490	UDP-glycosyltransferase 73B4	1.40673	0.885763	2.40235	2.76713	0.439531	2.50249	9.03382	5.93938
AT4G16730	terpene synthase 02	0.00744874	0.753223	3.95456	8.294	0	2.10709	13.9575	22.5359
AT1G78970	lupeol synthase 1	8.94318	2.98973	0.684692	0.883833	10.1238	0.465682	1.89348	1.89639
AT1G76640	Calcium-binding EF-hand family protein	4.3653	2.88877	8.83602	3.15361	0.621836	10.7166	22.7099	5.94004
AT1G26945	basic helix-loop-helix (bHLH) DNA-binding superfamily protein	1.10352	12.186	2.81965	5.79419	2.73454	31.661	4.28368	10.6082
AT1G43640	tubby like protein 5	0.0748343	2.33542	2.25548	1.38861	0.0206314	4.24236	7.29515	2.36104
AT2G29440	glutathione S-transferase tau 6	42.4289	2.01992	4.37778	7.65613	12.1493	11.2105	6.78293	10.3691
AT3G10200	S-adenosyl-L-methionine-dependent methyltransferases superfamily protein	0.533871	0.0804356	0.0355111	0.0442667	1.80195	0.212601	0.22953	0.531868
AT2G04040	MATE efflux family protein	2.5294	4.0612	5.44112	7.19823	1.11178	6.90584	8.51754	13.5664
