# Supplementary material for: Transcriptomic Analysis Revealed Key Defense Genes and Signaling Pathways Mediated by the Arabidopsis thaliana Gene SAD2 in Response to Infection with Pseudomonas syringae pv. Tomato DC3000
Source: Int J Mol Sci. 2023 Feb 20;24(4):4229. doi: 10.3390/ijms24044229 (PMC9963955; doi:10.3390/ijms24044229)
Supplement: Supplementary file 1 [file ijms-24-04229-s001.zip › Table S3.xlsx]

## Sheet: TableS3.EnrichGO
Table S3. Significantly enriched Gene Ontology (GO) terms among differentially expressed genes (DEGs) in SAD2 knockout and overexpression mutants compared to wild-type Arabidopsis
ID	Description	GeneNumber	Type
GO:0044699	single-organism process	760	Biological Process
GO:0050896	response to stimulus	615	Biological Process
GO:0044763	single-organism cellular process	499	Biological Process
GO:0006950	response to stress	351	Biological Process
GO:0044710	single-organism metabolic process	350	Biological Process
GO:0042221	response to chemical	320	Biological Process
GO:0032502	developmental process	249	Biological Process
GO:0009628	response to abiotic stimulus	244	Biological Process
GO:0044767	single-organism developmental process	243	Biological Process
GO:0010033	response to organic substance	236	Biological Process
GO:0051716	cellular response to stimulus	229	Biological Process
GO:0009719	response to endogenous stimulus	214	Biological Process
GO:1901700	response to oxygen-containing compound	205	Biological Process
GO:0009725	response to hormone	201	Biological Process
GO:0007154	cell communication	194	Biological Process
GO:0044700	single organism signaling	175	Biological Process
GO:0023052	signaling	175	Biological Process
GO:0007165	signal transduction	174	Biological Process
GO:0044711	single-organism biosynthetic process	162	Biological Process
GO:0001101	response to acid chemical	161	Biological Process
GO:0009605	response to external stimulus	151	Biological Process
GO:0006952	defense response	150	Biological Process
GO:0051704	multi-organism process	150	Biological Process
GO:0055114	oxidation-reduction process	141	Biological Process
GO:0009056	catabolic process	132	Biological Process
GO:0005975	carbohydrate metabolic process	116	Biological Process
GO:0009755	hormone-mediated signaling pathway	97	Biological Process
GO:0019748	secondary metabolic process	77	Biological Process
GO:0071555	cell wall organization	62	Biological Process
GO:0005976	polysaccharide metabolic process	56	Biological Process
GO:0044262	cellular carbohydrate metabolic process	51	Biological Process
GO:0006869	lipid transport	37	Biological Process
GO:0009698	phenylpropanoid metabolic process	36	Biological Process
GO:0009699	phenylpropanoid biosynthetic process	27	Biological Process
GO:0009813	flavonoid biosynthetic process	20	Biological Process
GO:0003824	catalytic activity	645	Molecular Function
GO:0001071	nucleic acid binding transcription factor activity	147	Molecular Function
GO:0003700	transcription factor activity, sequence-specific DNA binding	147	Molecular Function
GO:0016491	oxidoreductase activity	135	Molecular Function
GO:0016757	transferase activity, transferring glycosyl groups	69	Molecular Function
GO:0016798	hydrolase activity, acting on glycosyl bonds	56	Molecular Function
GO:0046906	tetrapyrrole binding	55	Molecular Function
GO:0016705	oxidoreductase activity, acting on paired donors, with incorporation or reduction of molecular oxygen	55	Molecular Function
GO:0004553	hydrolase activity, hydrolyzing O-glycosyl compounds	52	Molecular Function
GO:0020037	heme binding	50	Molecular Function
GO:0016758	transferase activity, transferring hexosyl groups	49	Molecular Function
GO:0008289	lipid binding	44	Molecular Function
GO:0030246	carbohydrate binding	41	Molecular Function
GO:0004497	monooxygenase activity	41	Molecular Function
GO:0019825	oxygen binding	37	Molecular Function
GO:0015926	glucosidase activity	19	Molecular Function
GO:0008422	beta-glucosidase activity	17	Molecular Function
GO:0008378	galactosyltransferase activity	11	Molecular Function
GO:0031224	intrinsic component of membrane	402	Cellular Component
GO:0071944	cell periphery	382	Cellular Component
GO:0005576	extracellular region	319	Cellular Component
GO:0005886	plasma membrane	302	Cellular Component
GO:0030312	external encapsulating structure	99	Cellular Component
GO:0005618	cell wall	99	Cellular Component
GO:0048046	apoplast	56	Cellular Component
GO:0009505	plant-type cell wall	48	Cellular Component
GO:0044421	extracellular region part	23	Cellular Component
