# Supplementary material for: Transcriptomic Analysis Revealed Key Defense Genes and Signaling Pathways Mediated by the Arabidopsis thaliana Gene SAD2 in Response to Infection with Pseudomonas syringae pv. Tomato DC3000
Source: Int J Mol Sci. 2023 Feb 20;24(4):4229. doi: 10.3390/ijms24044229 (PMC9963955; doi:10.3390/ijms24044229)
Supplement: Supplementary file 1 [file ijms-24-04229-s001.zip › Table S4.xlsx]

## Sheet: Sheet1
Table S4. Significantly enriched Kyoto Encyclopedia of Genes and Genomes (KEGG) biochemical pathway annotations among differentially expressed genes (DEGs) in SAD2 knockout and over-expression mutants compared to wild-type Arabidopsis.
#Term	Database	ID	Input number	Background number	P-Value	Corrected P-Value	Input	Hyperlink
Phenylpropanoid biosynthesis	KEGG PATHWAY	ath00940	31	166	2.84009e-08	2.41407e-06	832525|835504|833954|824238|842945|843498|842478|825184|825182|844421|820564|832111|835952|830368|818419|830088|838016|843126|820964|826447|843218|829953|825450|826448|821201|842479|841088|828285|836531|3767579|842814	http://www.genome.jp/kegg-bin/show_pathway?ath00940/ath:AT1G65060%09red/ath:AT5G54160%09red/ath:AT1G14540%09red/ath:AT1G80820%09red/ath:AT1G45191%09red/ath:AT4G08780%09red/ath:AT4G39330%09red/ath:AT1G61810%09red/ath:AT3G60140%09red/ath:AT3G60120%09red/ath:AT1G67980%09red/ath:AT3G03640%09red/ath:AT1G61820%09red/ath:AT4G08770%09red/ath:AT5G58390%09red/ath:AT4G37970%09red/ath:AT5G39580%09red/ath:AT5…
Biosynthesis of secondary metabolites	KEGG PATHWAY	ath01110	104	1107	2.25569e-07	9.58666e-06	832525|838844|840102|842536|842479|842478|831241|824482|817165|832111|817480|838016|841200|827200|828387|828140|822186|842779|839883|843498|829716|817412|819219|816955|838468|829417|839395|840184|821418|833954|836609|825184|825182|818419|838551|827575|830088|829933|841670|837082|839131|843218|827655|825450|843031|843182|828285|836531|3767579|830332|823888|836625|828959|827000|837542|844421|828759…	http://www.genome.jp/kegg-bin/show_pathway?ath01110/ath:AT1G01480%09red/ath:AT3G25900%09red/ath:AT1G45191%09red/ath:AT4G39330%09red/ath:AT1G61810%09red/ath:AT4G37770%09red/ath:AT3G30775%09red/ath:AT1G32900%09red/ath:AT4G00400%09red/ath:AT1G32100%09red/ath:AT4G34650%09red/ath:AT5G39580%09red/ath:AT1G07720%09red/ath:AT1G10060%09red/ath:AT1G31710%09red/ath:AT5G38120%09red/ath:AT4G37970%09red/ath:AT5…
Metabolic pathways	KEGG PATHWAY	ath01100	173	2246	5.78489e-06	0.000163905	832525|837576|823888|842779|842536|842479|842478|841820|844345|817165|832111|817480|819886|831317|828019|820083|839870|838016|838498|841200|828387|828140|833137|822186|841367|834948|817493|818785|843498|829716|817412|819219|828665|830010|838468|828067|828064|828959|839395|840184|821418|828580|836237|820770|818050|833954|836609|820815|821499|825184|825182|818419|822361|838035|817628|819130|844085|…	http://www.genome.jp/kegg-bin/show_pathway?ath01100/ath:AT2G19800%09red/ath:AT1G01480%09red/ath:AT3G25900%09red/ath:AT1G45191%09red/ath:AT4G39330%09red/ath:AT1G61810%09red/ath:AT3G27400%09red/ath:AT1G10370%09red/ath:AT4G37770%09red/ath:AT3G30775%09red/ath:AT5G20410%09red/ath:AT1G14700%09red/ath:AT2G43870%09red/ath:AT4G00400%09red/ath:AT5G10170%09red/ath:AT5G28237%09red/ath:AT4G34650%09red/ath:AT5…
Pentose and glucuronate interconversions	KEGG PATHWAY	ath00040	18	96	2.07955e-05	0.000441903	828580|824918|818991|819130|818785|819886|839452|831317|819988|829458|825155|836439|828067|828064|841820|820815|834948|822361	http://www.genome.jp/kegg-bin/show_pathway?ath00040/ath:AT2G43870%09red/ath:AT2G41850%09red/ath:AT1G53830%09red/ath:AT3G07010%09red/ath:AT4G02330%09red/ath:AT5G48900%09red/ath:AT4G33220%09red/ath:AT3G57510%09red/ath:AT2G45220%09red/ath:AT5G63180%09red/ath:AT3G15720%09red/ath:AT3G59850%09red/ath:AT5G14650%09red/ath:AT3G27400%09red/ath:AT3G07970%09red/ath:AT4G24780%09red/ath:AT1G04680%09red/ath:AT4…
Plant hormone signal transduction	KEGG PATHWAY	ath04075	33	273	5.26337e-05	0.000894773	836485|839570|831866|817145|830041|843096|818411|830999|28718697|818662|831669|837255|834390|816849|28721172|826850|821705|829893|828834|821111|839568|827102|820883|835920|816640|830427|835148|830039|835860|831670|829361|814707|827989	http://www.genome.jp/kegg-bin/show_pathway?ath04075/ath:AT1G04240%09red/ath:AT3G03820%09red/ath:AT2G23170%09red/ath:AT5G18080%09red/ath:AT4G38860%09red/ath:AT4G38840%09red/ath:AT2G01760%09red/ath:AT4G14550%09red/ath:AT2G40670%09red/ath:AT5G18020%09red/ath:AT1G67710%09red/ath:AT2G21050%09red/ath:AT4G27260%09red/ath:AT4G32280%09red/ath:AT5G01240%09red/ath:AT5G63650%09red/ath:AT5G05440%09red/ath:AT3…
Flavonoid biosynthesis	KEGG PATHWAY	ath00941	8	22	0.00010159	0.00129848	830409|830693|843126|836480|828387|831241|824287|834291	http://www.genome.jp/kegg-bin/show_pathway?ath00941/ath:AT4G22880%09red/ath:AT5G05270%09red/ath:AT3G51240%09red/ath:AT1G67980%09red/ath:AT5G42800%09red/ath:AT5G63600%09red/ath:AT5G13930%09red/ath:AT5G07990%09red
Starch and sucrose metabolism	KEGG PATHWAY	ath00500	23	165	0.000106934	0.00129848	842747|832525|820591|842945|842479|842478|836609|825184|825182|816697|818212|830368|818580|841200|827185|827498|825450|830076|821201|841088|3767579|830135|840184	http://www.genome.jp/kegg-bin/show_pathway?ath00500/ath:AT1G45191%09red/ath:AT1G61810%09red/ath:AT3G60140%09red/ath:AT3G60120%09red/ath:AT4G39210%09red/ath:AT3G03640%09red/ath:AT1G32900%09red/ath:AT4G17770%09red/ath:AT1G64390%09red/ath:AT5G04885%09red/ath:AT2G39930%09red/ath:AT5G24540%09red/ath:AT1G66280%09red/ath:AT1G61820%09red/ath:AT3G13790%09red/ath:AT1G47840%09red/ath:AT3G62750%09red/ath:AT2…
Cutin, suberine and wax biosynthesis	KEGG PATHWAY	ath00073	9	31	0.000157678	0.00167533	837602|836003|832311|823579|834106|830721|832383|833704|828019	http://www.genome.jp/kegg-bin/show_pathway?ath00073/ath:AT4G00360%09red/ath:AT5G58860%09red/ath:AT5G41040%09red/ath:AT1G02205%09red/ath:AT3G44540%09red/ath:AT5G37300%09red/ath:AT5G22500%09red/ath:AT5G23190%09red/ath:AT5G08250%09red
Fatty acid elongation	KEGG PATHWAY	ath00062	9	35	0.000339668	0.00320797	827458|817412|843182|839578|839131|837286|817165|839395|830332	http://www.genome.jp/kegg-bin/show_pathway?ath00062/ath:AT1G04220%09red/ath:AT2G26250%09red/ath:AT1G68530%09red/ath:AT1G01120%09red/ath:AT2G28630%09red/ath:AT4G17470%09red/ath:AT1G25450%09red/ath:AT1G07720%09red/ath:AT5G04530%09red
Cyanoamino acid metabolism	KEGG PATHWAY	ath00460	12	69	0.000860754	0.00731641	821201|832525|841088|842945|830368|842479|842478|3767579|825450|825184|827024|825182	http://www.genome.jp/kegg-bin/show_pathway?ath00460/ath:AT1G66280%09red/ath:AT5G24540%09red/ath:AT1G61820%09red/ath:AT1G60270%09red/ath:AT1G45191%09red/ath:AT4G13890%09red/ath:AT1G61810%09red/ath:AT3G60140%09red/ath:AT3G60120%09red/ath:AT3G62750%09red/ath:AT3G03640%09red/ath:AT5G04885%09red
Galactose metabolism	KEGG PATHWAY	ath00052	10	57	0.00214049	0.0165401	841200|837457|832147|820591|842622|833137|824919|819331|842114|834037	http://www.genome.jp/kegg-bin/show_pathway?ath00052/ath:AT1G09350%09red/ath:AT2G47180%09red/ath:AT1G63180%09red/ath:AT1G56600%09red/ath:AT5G40390%09red/ath:AT5G30500%09red/ath:AT1G47840%09red/ath:AT5G20250%09red/ath:AT3G57520%09red/ath:AT3G13790%09red
MAPK signaling pathway - plant	KEGG PATHWAY	ath04016	16	134	0.00459956	0.0325802	836344|836485|834470|822119|834469|837255|817145|837082|832546|830427|818411|828455|837421|817173|816436|835179	http://www.genome.jp/kegg-bin/show_pathway?ath04016/ath:AT1G09000%09red/ath:AT2G26040%09red/ath:AT1G01480%09red/ath:AT5G63650%09red/ath:AT1G07430%09red/ath:AT5G05440%09red/ath:AT4G23550%09red/ath:AT2G38310%09red/ath:AT5G62230%09red/ath:AT5G44420%09red/ath:AT5G44430%09red/ath:AT5G24770%09red/ath:AT2G19190%09red/ath:AT3G25250%09red/ath:AT5G51060%09red/ath:AT2G26330%09red
