# Supplementary material for: Transcriptomic Analysis Revealed Key Defense Genes and Signaling Pathways Mediated by the Arabidopsis thaliana Gene SAD2 in Response to Infection with Pseudomonas syringae pv. Tomato DC3000
Source: Int J Mol Sci. 2023 Feb 20;24(4):4229. doi: 10.3390/ijms24044229 (PMC9963955; doi:10.3390/ijms24044229)
Supplement: Supplementary file 1 [file ijms-24-04229-s001.zip › Table S6.xlsx]

## Sheet: Sheet1
	Table S6. Average transcripts per million tags (TPM) values for 49 major transcription factors in wild-type Col-0, SAD2 knockout, and SAD2 overexpression lines (sad2-5 and OESAD2/Col-0, respectively) after infection with Pseudomonas syringae pv. tomato DC3000
	GeneID	Transcription factor	C0	C1	C2	C3	s0	s1	s2	s3	OES0	OES1	OES2	OES3
	AT1G80580	ERF/AP2	0	1.73713	0.847701	1.14565	0	2.4085	4.16077	2.95744	0	3.98405	0.995978	1.38713
	AT5G21960	ERF/AP2	4.10022	1.30744	1.24768	11.457	6.27374	0.641668	3.51706	2.35261	7.0442	0.367846	3.84418	2.70763
	AT4G16750	ERF/AP2	5.14865	11.0264	17.4203	4.98561	4.78876	7.37253	5.66214	4.91028	4.62243	5.26531	8.00157	5.72939
	AT1G01250	ERF/AP2	3.10674	5.39552	6.4778	1.60008	1.97752	1.749	1.6307	1.68034	5.62181	1.64707	1.38557	2.73575
	AT5G25390	ERF/AP2	0	0.605132	0.86363	0.0146654	0.148795	0.244582	0.0131785	0.0465704	0.161894	0.0687669	0.0273706	0.0128113
	AT5G64750	ERF/AP2	232.049	0.784441	1.2058	2.85526	129.779	2.02936	3.24522	2.42016	65.8817	3.84711	1.78483	1.35576
	AT5G11590	ERF/AP2	4.77512	2.17468	0.877578	0.109693	2.527	2.02257	0.0774685	0.0951339	2.81658	0.96846	0.276466	0.269763
	AT4G25480	ERF/AP2	5.02795	16.7023	27.4157	4.57341	4.42824	11.468	13.9716	5.02115	8.25544	4.57696	11.4973	5.25257
	AT5G61590	ERF/AP2	48.6209	50.2089	63.588	69.1774	25.9494	42.9388	52.0637	89.5955	34.6847	20.3345	49.2593	73.6366
	AT1G28370	ERF/AP2	126.582	10.1633	13.1571	34.7995	305.92	9.71106	11.9861	17.0088	220.858	9.54589	12.2237	15.8535
	AT1G06160	ERF/AP2	0.0761088	3.63447	3.024	5.96334	0.833446	2.18173	1.07689	10.5696	0.108077	0.554518	1.31351	7.179
	AT4G31060	ERF/AP2	3.95967	3.0412	2.71141	2.94465	4.43136	3.40505	2.53091	3.91206	6.62176	1.24285	3.47123	3.71479
	AT5G07580	ERF/AP2	77.6988	37.0728	35.1653	48.3444	25.7215	28.1368	29.5745	58.3247	21.6521	14.118	28.8199	49.2981
	AT4G28140	ERF/AP2	167.841	3.6074	20.7304	50.9093	117.554	7.76279	17.0023	48.4554	43.0712	4.78669	9.66275	29.1457
	AT5G61600	ERF/AP2	4.82495	25.6653	26.49	47.939	13.2628	24.7076	20.2523	24.2712	87.8434	25.3408	23.0854	23.3137
	AT1G74930	ERF/AP2	15.2445	4.48541	5.86433	9.53573	71.3004	3.17966	3.93202	4.04527	72.9738	3.70728	6.11592	3.38623
	AT1G43160	ERF/AP2	58.9514	92.7463	53.2526	34.9422	40.2079	120.289	73.5272	47.4824	4.80225	182.901	61.4086	24.6326
	AT2G40340	ERF/AP2	4.6335	6.6781	9.45787	12.9559	3.02946	12.0653	15.2373	12.3527	3.02436	13.9168	10.0256	10.2019
	AT5G53290	ERF/AP2	7.64866	2.25292	3.16224	2.66204	3.19329	2.93738	4.97679	2.95706	1.49069	4.97037	4.94386	3.5606
	AT1G46768	ERF/AP2	3.86249	8.56379	13.0108	6.6662	1.18582	6.38389	5.681	7.63257	2.03732	6.13119	7.57585	6.48686
	AT2G44840	ERF/AP2	44.069	7.21574	3.60625	12.7886	93.9351	5.14297	3.84751	2.96444	157.448	7.58882	6.55152	4.87262
	AT5G07310	ERF/AP2	1.03243	0.046346	1.04635	1.59995	0.621162	0.200344	1.92532	1.71321	0.0522466	0.581498	1.06553	3.15593
	AT5G61890	ERF/AP2	8.01708	3.7585	9.95098	9.29048	5.14559	6.31485	11.5543	9.87047	0.468699	10.0532	9.26854	6.9078
	AT1G18710	MYB	60.2227	11.8771	11.6801	2.66155	87.092	6.73003	1.64504	3.20675	53.0019	3.77974	3.39112	2.87582
	AT4G01060	MYB	0.836212	3.25372	3.43596	0.485717	0.828411	2.04982	0.37162	0.571806	0.96315	2.02294	0.282431	0.290783
	AT1G66370	MYB	6.96345	0.546509	1.41091	1.59505	1.02782	0.161602	0.036949	0.406715	0.0419977	0	0.274957	1.12336
	AT1G66390	MYB	0.272459	26.359	94.8409	110.578	0.372603	21.6483	29.0659	103.277	0.0166767	8.44415	22.4351	102.61
	AT5G07690	MYB	20.0465	7.46227	8.57225	4.89728	17.4908	5.05965	3.45686	4.12673	15.9545	2.94086	8.20018	6.71961
	AT5G62470	MYB	114.466	3.56064	4.69325	2.14897	114.431	4.40697	2.91631	3.04281	81.6909	1.91816	1.67665	2.24489
	AT4G21440	MYB	1.80039	2.82693	6.12857	6.28871	1.05762	3.88341	7.42328	8.32398	0.922124	2.52414	3.11709	2.43798
	AT1G74650	MYB	0.375078	0.909404	0.635434	0.367289	1.84719	1.40574	0.403605	1.00113	0.418926	0.196866	0.151119	0.404296
	AT4G38620	MYB	41.333	12.8204	14.5506	20.5423	11.3245	38.543	44.148	58.3634	5.5222	10.3956	16.9099	25.5121
	AT1G13300	MYB	0.0222643	0.00941995	0.00939283	0.490471	0.0443432	0.0317603	0.285411	0.663895	0.0132928	0.0373607	0.128691	1.10871
	AT1G57560	MYB	14.5575	38.5482	12.0334	11.6883	7.65796	49.315	18.8498	8.69778	1.58864	68.153	26.6437	14.1628
	AT3G06490	MYB	3.10421	3.16506	9.31463	10.8521	4.1582	3.16995	7.81678	8.75158	3.11118	6.32515	11.7223	8.59869
	AT4G18770	MYB	0.604229	0.900886	0.262171	0.0231162	0.568154	0.593689	0.028824	0.115856	0.890403	0.421286	0.108499	0.0286137
	AT3G23250	MYB	198.773	6.96068	6.37814	21.8566	252.444	5.97614	9.56589	8.23181	127.463	9.04949	7.67404	11.6282
	AT5G40350	MYB	5.43863	0.117464	2.45812	1.25383	14.5127	0.0803503	0.833656	1.29195	9.10896	0.359469	2.33459	2.76044
	AT2G32460	MYB	0.0493981	4.11959	4.47871	2.01577	0.0229572	5.9341	4.54221	1.55135	0.00819031	12.4236	5.96358	1.84145
	AT4G09820	bHLH	0.47924	0.644331	3.78069	1.86801	0	0.604347	1.19192	4.74675	0.0393625	0.0246832	0.137587	1.20354
	AT5G10570	bHLH	0.0528515	0.890537	1.11893	0.726126	0.231402	0.486423	0.0254969	0.541258	0.164848	0.0361308	0.601528	1.56132
	AT1G26945	bHLH	1.58932	21.4972	8.79838	2.84643	1.10352	12.186	2.81965	5.79419	2.73454	31.661	4.28368	10.6082
	AT4G20970	bHLH	10.9571	9.94334	5.22361	6.97204	11.7593	16.4949	17.1037	7.52576	3.8915	34.0578	12.1834	7.11512
	AT4G00480	bHLH	0.569741	0.301745	0.174535	0.0545853	0.205341	0.0803677	0.0225308	0.103588	0.437791	0.027538	0.23665	0.143832
	AT2G18300	bHLH	16.4086	25.4361	11.8811	16.4922	10.3704	21.7423	11.0913	22.1386	16.4571	10.1066	18.9726	20.558
	AT4G00050	bHLH	5.40069	8.16293	6.84064	5.35924	6.45352	4.78813	3.93881	4.26775	8.6492	3.89475	3.73276	5.38355
	AT2G22750	bHLH	0.0346677	0.0191024	0.428477	0.0692935	0	0.0867063	0.221883	0.230496	0	0.114611	0.339505	0.564842
	AT3G20640	bHLH	3.88293	1.91247	2.35378	2.51611	2.23568	1.21556	0.874939	1.97145	2.36084	0.881558	1.94761	2.44154
	AT5G50915	bHLH	28.7417	0.670084	0.19974	1.21828	22.011	1.09249	0.336566	0.877345	61.3288	4.22159	0.709981	3.30121
