# Supplementary material for: Transcriptomic Analysis Revealed Key Defense Genes and Signaling Pathways Mediated by the Arabidopsis thaliana Gene SAD2 in Response to Infection with Pseudomonas syringae pv. Tomato DC3000
Source: Int J Mol Sci. 2023 Feb 20;24(4):4229. doi: 10.3390/ijms24044229 (PMC9963955; doi:10.3390/ijms24044229)
Supplement: Supplementary file 1 [file ijms-24-04229-s001.zip › Table S7.xlsx]

## Sheet: Sheet1
TableS7 Primers of RT-qPCR
Gene ID	Primer Name	Primer Sequence (5' to 3')	Locations of primer (in CDS)	Product Size (bp)	Primer concentrations	Efficiency of amplification
AT2G37620	ACTIN1-F	CGCCGACAGAATGAGCAAAG	933-952 bp	201	10pmol/ul	1
	ACTIN1-R	CAGAAGCACTTCCTGTGAAC	1114-1133 bp		10pmol/ul
AT2G31660	SAD2-qPCR-F	ATGACGACGATTCTGATGATGA	2852-2873 bp	221	10pmol/ul	1
	SAD2-qPCR-F	CTTCTCGATCTCCACTCTTCTC	3051-3072 bp		10pmol/ul
AT1G04800	AT1G04800-qPCR-F	ACTATGGGAGAAGCAGAGTTTG	64-85 bp	107	10pmol/ul	1
	AT1G04800-qPCR-R	CCTAAGTCGCCGAATTCTTTTT	149-170 bp		10pmol/ul
AT1G26945	AT1G26945-qPCR-F	TTTCTAAGCTCCAACACCTCAT	77-98 bp	118	10pmol/ul	1
	AT1G26945-qPCR-R	TCAACCTCTCTGTGTAAGTTCC	173-194 bp		10pmol/ul
AT1G66100	AT1G66100-qPCR-F	CAAATATTTGCTGTCCGTCCAT	71-92 bp	128	10pmol/ul	1
	AT1G66100-qPCR-R	TCTAGGACATGTCGACTCACTA	177-198 bp		10pmol/ul
AT2G04040	AT2G04040-qPCR-F	CTGCTATTGCTTCCAACATACC	332-353 bp	148	10pmol/ul	1
	AT2G04040-qPCR-R	CCAAATAAAGCCGGTATAAGCC	458-479 bp		10pmol/ul
AT2G15490	AT2G15490-qPCR-F	AGGAATAAAGGAAAAGGGCTGA	1030-1051 bp	220	10pmol/ul	1
	AT2G15490-qPCR-R	CTCCAACGTTCACTCCTATTCT	1228-1249 bp		10pmol/ul
AT3G51240	AT3G51240-qPCR-F	ACTCGAGCAGATTATCCATAGC	845-866 bp	128	10pmol/ul	1
	AT3G51240-qPCR-R	CTTATACATCTCGGCAAACGTG	951-972 bp		10pmol/ul
AT4G22880	AT4G22880-qPCR-F	CTGATTCGATTGTGATGCACAT	791-812 bp	148	10pmol/ul	1
	AT4G22880-qPCR-R	ACAATCTTATCCTTTGGGGGTT	917-938 bp		10pmol/ul
AT5G07990	AT5G07990-qPCR-F	CGTTAGCATTTAAACCCGAGAG	1226-1247	154	10pmol/ul	1
	AT5G07990-qPCR-R	GCCGTAAGAAACTGAATCGTAC	1358-1379		10pmol/ul
AT5G13930	AT5G13930-qPCR-F	TCTTTGGATGAGATCAGACAGG	22-43 bp	120	10pmol/ul	1
	AT5G13930-qPCR-R	GCGGAAGTAGTAGTCAGGATAC	120-141 bp		10pmol/ul
AT5G46871	AT5G46871-qPCR-F	TGAAGACCTCAGCTTTCTTCAT	2-23 bp	190	10pmol/ul	1
	AT5G46871-qPCR-R	GTCGGAAGAGATTTTGGCTTAC	170-191 bp		10pmol/ul
